# Supplementary material for: ROPPSA: TV Program Recommendation Based on Personality and Social Awareness
Source: Hindawi journal article supplement (doi:10.1155/2020/1971286), 2020-06-08
Supplement: f1 [file 1971286.f1.zip]

Archive with 2 entries (2 files):
- 1971286.f1/1971286.final-supplementary file-dataset description_MPE_3087397.pdf
- 1971286.f1/ROPPSA-ATU-Dataset [Protected].xlsx
