# Supplementary material for: ROPPSA: TV Program Recommendation Based on Personality and Social Awareness
Source: Hindawi journal article supplement (doi:10.1155/2020/1971286), 2020-06-08
Supplement: f1 [file 1971286.f1.zip › 1971286.f1/1971286.final-supplementary file-dataset description_MPE_3087397.pdf]

**Title of Research Article:** ROPPSA: TV Program Recommendation Based on Personality and Social Awareness

**Journal:** Mathematical Problems in Engineering

**Special Issue:** Big Data Modelling of Engineering and Management

**Supplementary Material**

### Dataset Description

The dataset utilized in the research article above involves relevant data collected from students in Accra Technical University (ATU), Ghana and is an extension from a dataset used in [1]. Data was gathered from students in Higher National Diploma (HND) Marketing ( $n=2864$ ), HND Computer Science ( $n=720$ ) and HND Building Technology ( $n=812$ ). Therefore, the ATU dataset utilized in this paper contains a total of 4396 TV viewers (2421 males representing 55.07% and 1975 females representing 44.93%).

The ATU dataset in this research article contains tie strength data which comprises of computations of contact frequencies (Fig. 1) and contact duration (Fig. 2) of ATU students (users designated as TV viewers).

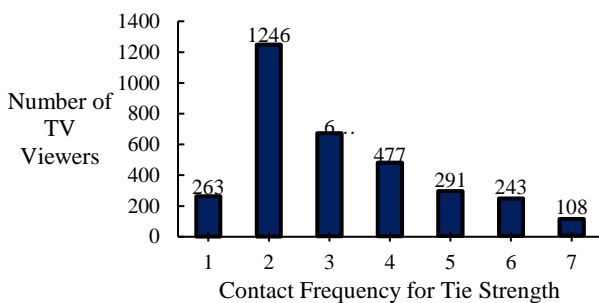

Fig. 1. ATU dataset – contact frequency trends.

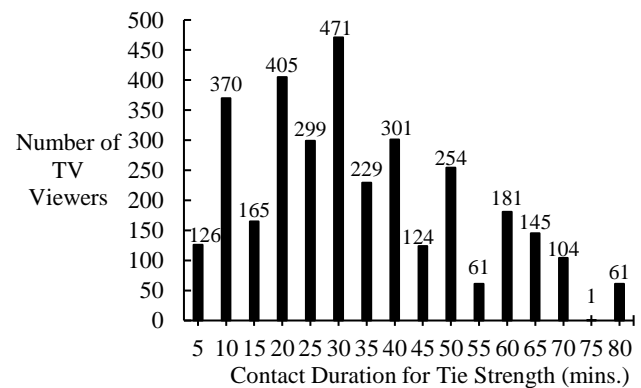

Fig. 2. ATU dataset – contact duration trends.

The ATU dataset also comprises of personality trait ratings (scale of 1 to 5) of all users (TV viewers) in accordance to the Big Five Personality Traits (BFPT). The total number of personality ratings for all the traits combined in the ATU dataset is 22,541. Fig. 3 illustrates the personality trait data utilized in our ATU dataset for experimentation.

Additionally, in order to ensure and substantiate recommendation accuracy in our experimentation procedure, we gathered TV program interests of TV viewers in accordance to the following: *Movie/TV Series-Horror, Action, Comedy, Adventure and Drama; Sports/Games-Football, Basketball, Hockey, Boxing and Athletics*. Tables 1 and 2 illustrate data regarding TV program interests of TV viewers in the ATU dataset in accordance to their ratings.

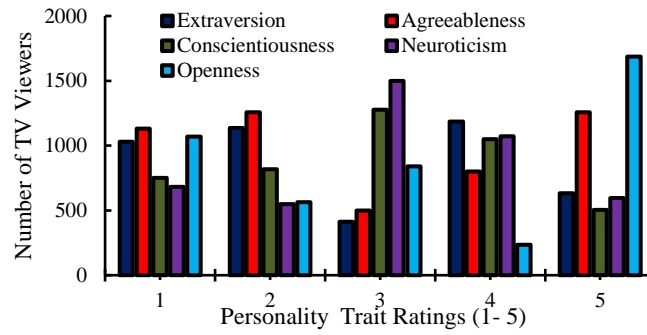

Fig. 3. ATU dataset – personality Data.

TABLE 1  
ATU DATASET – SPORTS TV PROGRAM RATINGS

| Category                   | Ratings (1 - 5) |      |      |      |      |
|----------------------------|-----------------|------|------|------|------|
|                            | 1               | 2    | 3    | 4    | 5    |
| Football                   | 1975            | 0    | 0    | 0    | 2421 |
| Basketball                 | 1381            | 594  | 2421 | 0    | 594  |
| Hockey                     | 2978            | 108  | 570  | 148  | 592  |
| Boxing                     | 1381            | 0    | 594  | 1483 | 938  |
| Athletics                  | 1381            | 2077 | 0    | 938  | 0    |
| Total Ratings              | 9097            | 2781 | 3588 | 2573 | 4550 |
| Grand Total of all Ratings | <b>22,589</b>   |      |      |      |      |

TABLE 2  
ATU DATASET – MOVIE/TV SERIES PROGRAM RATINGS

| Category                   | Ratings (1 - 5) |      |      |      |      |
|----------------------------|-----------------|------|------|------|------|
|                            | 1               | 2    | 3    | 4    | 5    |
| Horror                     | 1890            | 2139 | 85   | 170  | 112  |
| Comedy                     | 167             | 1941 | 2039 | 146  | 1941 |
| Action                     | 114             | 108  | 1951 | 148  | 2075 |
| Adventure                  | 120             | 1477 | 525  | 1702 | 572  |
| Drama                      | 164             | 1805 | 129  | 2007 | 291  |
| Total Ratings              | 2456            | 7472 | 4732 | 4177 | 4996 |
| Grand Total of all Ratings | <b>23,833</b>   |      |      |      |      |

## REFERENCE

- [1] N. Y. Asabere, B. Xu, A. Acakpovi, and N. Deonauth, "SARVE-2: Exploiting Social Venue Recommendation in the Context of Smart Conferences," *IEEE Trans. on Emerging Topics in Comp.*, DOI: 10.1109/TETC.2018.2854718, 2018.
