# Supplementary material for: ROPPSA: TV Program Recommendation Based on Personality and Social Awareness
Source: Hindawi journal article supplement (doi:10.1155/2020/1971286), 2020-06-08
Supplement: f1 [file 1971286.f1.zip › 1971286.f1/ROPPSA-ATU-Dataset [Protected].xlsx]

## Sheet: Tie Strength
ACCRA TECHNICAL UNIVERSITY
ATU Dataset - HND Marketing
No.	Contact	Sex	Frequency	Duration (mins.)	Past SocTie	Frequency	Duration (mins.)	Present SocTie	SocTie, β=0.1	SocTie, β=0.2	SocTie, β=0.3	SocTie, β=0.4	SocTie, β=0.5
1	ABABIO ABEDNEGO A.	Male
	ABOAGYE ELIZABETH BOADIWAA	Female	7	10	0.0614035	6	10	0.0833333	0.0811404	0.0789474	0.0767544	0.0745614	0.0723684
	ABOE ANDREWS	Male	5	60	0.263158	4	60	0.333333	0.326316	0.319298	0.312281	0.305263	0.298246
	ABRAHAM-QUANSAH MARY EVA	Female	4	65	0.22807	3	65	0.270833	0.266557	0.262281	0.258004	0.253728	0.249452
2	ABALEM JENNIFER	Female
	ADDAE SANDRA	Female	4	30	0.105263	1	30	0.0416667	0.0480263	0.054386	0.0607456	0.0671053	0.0734649
	ADJEI FREDERICK YAW	Male	5	35	0.153509	2	35	0.0972222	0.102851	0.10848	0.114108	0.119737	0.125365
	ADJEI PRINCE BAFFOUR	Male	6	25	0.131579	1	25	0.0347222	0.0444079	0.0540936	0.0637792	0.0734649	0.0831506
3	ABBAN VIDA OWUSU	Female
	ADJEI SAMUEL	Male	7	50	0.307018	2	10	0.0277778	0.0557018	0.0836257	0.11155	0.139474	0.167398
	ADJORLOLO MERCY NORKPLIM	Female	4	30	0.105263	3	30	0.125	0.123026	0.121053	0.119079	0.117105	0.115132
	ADOCTOR VICTORIA	Female	5	45	0.197368	4	45	0.25	0.244737	0.239474	0.234211	0.228947	0.223684
4	ADU AFRIYIE	Male
	ADU EMMANUEL	Male	7	35	0.214912	6	35	0.291667	0.283991	0.276316	0.26864	0.260965	0.253289
	ADZOWU MILLICENT	Female	1	5	0.00438596	2	65	0.180556	0.162939	0.145322	0.127705	0.110088	0.0924708
	AFORDE JAMES ABLORDE	Male	2	50	0.0877193	2	50	0.138889	0.133772	0.128655	0.123538	0.118421	0.113304
5	ABDALLAH FATIMATU	Female
	AGBENYEGA STEPHEN	Male	4	30	0.105263	3	30	0.125	0.123026	0.121053	0.119079	0.117105	0.115132
	AGBOGBA LANDRY KWAME	Male	5	20	0.0877193	4	20	0.111111	0.108772	0.106433	0.104094	0.101754	0.0994152
	AGGERH BARNABAS KOBBY	Male	6	10	0.0526316	5	10	0.0694444	0.0677632	0.0660819	0.0644006	0.0627193	0.061038
6	ABDULAI FAIZA	Female
	AGOE JEHOSHAPHAT SOWAH	Male	2	15	0.0263158	1	15	0.0208333	0.0213816	0.0219298	0.0224781	0.0230263	0.0235746
	AGUDA NARKIE PATRICIA	Female	3	40	0.105263	2	40	0.111111	0.110526	0.109942	0.109357	0.108772	0.108187
	AGYARE PRISCILLA DARFOUR	Female	2	20	0.0350877	1	20	0.0277778	0.0285088	0.0292398	0.0299708	0.0307018	0.0314327
7	ABEKAH EMMANUEL	Male
	AGYEI RICHARD KWAME	Male	4	40	0.140351	1	40	0.0555556	0.0640351	0.0725146	0.0809942	0.0894737	0.0979532
	AGYEMAN DUAH BOATEMAA	Female	4	50	0.175439	2	50	0.138889	0.142544	0.146199	0.149854	0.153509	0.157164
	AGYEMAN PAUL BOAKYE	Male	3	25	0.0657895	1	25	0.0347222	0.0378289	0.0409357	0.0440424	0.0471491	0.0502558
8	ABOAGYE DAVID ADU	Male
	AGYIRI GEORGINA	Female	3	40	0.105263	1	40	0.0555556	0.0605263	0.0654971	0.0704678	0.0754386	0.0804094
	AHIABLEY PORTIA	Female	4	20	0.0701754	2	20	0.0555556	0.0570175	0.0584795	0.0599415	0.0614035	0.0628655
	AHONI MAUDLIN AYONGO	Female	4	30	0.105263	2	30	0.0833333	0.0855263	0.0877193	0.0899123	0.0921053	0.0942982
9	ABOAGYE FELIX	Male
	AKAGBO REBECCA	Female	4	30	0.105263	1	10	0.0138889	0.0230263	0.0321637	0.0413012	0.0504386	0.059576
	AKOTO REINDOLF APPIAH	Male	2	20	0.0350877	4	20	0.111111	0.103509	0.0959064	0.0883041	0.0807018	0.0730994
	AKUFFO GIDEON	Male	1	30	0.0263158	1	30	0.0416667	0.0401316	0.0385965	0.0370614	0.0355263	0.0339912
10	ABU ABDUL MANAF	Male
	ALAGBO EMMANUEL	Male	3	40	0.105263	2	40	0.111111	0.110526	0.109942	0.109357	0.108772	0.108187
	ALLOTEY KPAKPO VINCENT	Male	2	50	0.0877193	1	50	0.0694444	0.0712719	0.0730994	0.0749269	0.0767544	0.0785819
	ALLOTEY PEARL NAA AKU	Female	2	60	0.105263	1	60	0.0833333	0.0855263	0.0877193	0.0899123	0.0921053	0.0942982
11	ABUBAKAR ARAFAT SUFYAN	Male
	AMAKYE JAMES SARPONG	Male	7	70	0.429825	6	70	0.583333	0.567982	0.552632	0.537281	0.52193	0.506579
	AMEVOR ERIC	Male	5	80	0.350877	4	80	0.444444	0.435088	0.425731	0.416374	0.407018	0.397661
	AMOAH CHARLOTTE KORKOR	Female	4	10	0.0350877	3	10	0.0416667	0.0410088	0.0403509	0.039693	0.0390351	0.0383772
12	ACHEAMPONG CHRISTABEL	Female
	AMOAH MILDRED	Female	4	5	0.0175439	3	5	0.0208333	0.0205044	0.0201754	0.0198465	0.0195175	0.0191886
	AMOAKO ERNESTINA OPOKUA	Female	2	10	0.0175439	1	10	0.0138889	0.0142544	0.0146199	0.0149854	0.0153509	0.0157164
	AMPONSAH CECILIA ABENA	Female	1	15	0.0131579	1	15	0.0208333	0.0200658	0.0192982	0.0185307	0.0177632	0.0169956
13	ACHEAMPONG KINGSLEY	Male
	AMUZU STELLA KABUKI	Female	5	20	0.0877193	4	20	0.111111	0.108772	0.106433	0.104094	0.101754	0.0994152
	ANABI MUSAH AHMED	Male	6	25	0.131579	5	25	0.173611	0.169408	0.165205	0.161001	0.156798	0.152595
	ANDERSON GIFTY	Female	2	30	0.0526316	1	30	0.0416667	0.0427632	0.0438596	0.0449561	0.0460526	0.0471491
14	ACHEAMPONG MICHAEL APPIAH	Male
	ANDERSON VIVIAN	Female	3	35	0.0921053	2	35	0.0972222	0.0967105	0.0961988	0.0956871	0.0951754	0.0946637
	ANKOMAH GEORGINA	Female	3	40	0.105263	2	40	0.111111	0.110526	0.109942	0.109357	0.108772	0.108187
	ANNANG FRANCISCA TORSHIE	Female	2	45	0.0789474	1	45	0.0625	0.0641447	0.0657895	0.0674342	0.0690789	0.0707237
15	ACQUAH BENJAMIN	Male
	ANNOR RICHAEL	Female	2	50	0.0877193	1	50	0.0694444	0.0712719	0.0730994	0.0749269	0.0767544	0.0785819
	ANSAH FAUSTINA	Female	3	55	0.144737	2	55	0.152778	0.151974	0.15117	0.150365	0.149561	0.148757
	ANSAH MARFO DOREEN	Female	2	60	0.105263	1	60	0.0833333	0.0855263	0.0877193	0.0899123	0.0921053	0.0942982
16	ACQUAH KINGSLEY OCANSEY	Male
	ANTHONIO HENRIETTA	Female	3	65	0.171053	2	65	0.180556	0.179605	0.178655	0.177705	0.176754	0.175804
	APPIAH ISAAC	Male	2	70	0.122807	1	70	0.0972222	0.0997807	0.102339	0.104898	0.107456	0.110015
	APPIAH MOSES	Male	6	5	0.0263158	5	5	0.0347222	0.0338816	0.0330409	0.0322003	0.0313596	0.030519
17	ACQUAH PHILIP	Male
	APPIAH PRINCE KWESI	Male	2	20	0.0350877	3	10	0.0416667	0.0410088	0.0403509	0.039693	0.0390351	0.0383772
	ARKO HAGAR	Female	3	25	0.0657895	4	20	0.111111	0.106579	0.102047	0.0975146	0.0929825	0.0884503
	ARKOH GALAHAD AHINSAH	Female	2	20	0.0350877	3	20	0.0833333	0.0785088	0.0736842	0.0688596	0.0640351	0.0592105
18	ADAM HALIMATU SADIA	Female
	ARTHUR EBENEZER	Male	6	25	0.131579	4	25	0.138889	0.138158	0.137427	0.136696	0.135965	0.135234
	ARTHUR ESSUMAN JAMES	Male	6	30	0.157895	4	30	0.166667	0.165789	0.164912	0.164035	0.163158	0.162281
	ARYEETEY MESHACK	Male	4	35	0.122807	3	35	0.145833	0.143531	0.141228	0.138925	0.136623	0.13432
19	ADAMA-TETTEY MARYNSKY	Female
	ASABIRE SOPHIA	Female	4	30	0.105263	3	6	0.025	0.0330263	0.0410526	0.0490789	0.0571053	0.0651316
	ASAHENE EMMANUELLA	Female	4	25	0.0877193	3	12	0.05	0.0537719	0.0575439	0.0613158	0.0650877	0.0688596
	ASAMANY CARL	Male	6	15	0.0789474	4	18	0.1	0.0978947	0.0957895	0.0936842	0.0915789	0.0894737
20	ADAMS AFISHETU	Female
	ASAMOAH MERCY	Female	5	25	0.109649	4	24	0.133333	0.130965	0.128596	0.126228	0.12386	0.121491
	ASARE ERIC AGYIRI AWERE	Male	5	30	0.131579	4	27	0.15	0.148158	0.146316	0.144474	0.142632	0.140789
	ASHITEY MCZILL HAFIZ OKO	Male	2	30	0.0526316	3	30	0.125	0.117763	0.110526	0.103289	0.0960526	0.0888158
21	ADAMS ANASS	Male
	ASIEDU MAVIS	Female	1	10	0.00877193	2	10	0.0277778	0.0258772	0.0239766	0.022076	0.0201754	0.0182749
	ATIEMO JOSEPHINE	Female	1	60	0.0526316	2	60	0.166667	0.155263	0.14386	0.132456	0.121053	0.109649
	AWUDER WILLIAM YAO	Male	2	65	0.114035	3	65	0.270833	0.255154	0.239474	0.223794	0.208114	0.192434
22	ADARKWAH IRENE	Female
	AYER PERCY OKAI	Male	1	30	0.0263158	2	30	0.0833333	0.0776316	0.0719298	0.0662281	0.0605263	0.0548246
	AYISI BENJAMIN	Male	3	35	0.0921053	4	35	0.194444	0.184211	0.173977	0.163743	0.153509	0.143275
	AZAMETSI MIRABLE	Female	2	25	0.0438596	3	25	0.104167	0.098136	0.0921053	0.0860746	0.0800439	0.0740132
23	ADDAE PORTIA	Female
	BEDIAKO PRISCILLA ODURO	Female	4	10	0.0350877	5	10	0.0694444	0.0660088	0.0625731	0.0591374	0.0557018	0.0522661
	BELLEY BETTY	Female	1	30	0.0263158	2	30	0.0833333	0.0776316	0.0719298	0.0662281	0.0605263	0.0548246
	BOATEMAA SLYVIA	Female	2	45	0.0789474	3	45	0.1875	0.176645	0.165789	0.154934	0.144079	0.133224
24	ADDEY AUGUSTINE	Male
	BOATENG ABRAHAM AMEGAVIE	Male	2	35	0.0614035	3	35	0.145833	0.13739	0.128947	0.120504	0.112061	0.103618
	BONDZIE SAMUEL AIDOO	Male	3	65	0.171053	4	65	0.361111	0.342105	0.323099	0.304094	0.285088	0.266082
	BONI MAXWELL EDEM	Male	4	50	0.175439	5	50	0.347222	0.330044	0.312865	0.295687	0.278509	0.26133
25	ADDICO FRANCIS AWULEY	Male
	BOTCHWAY HANNAH	Female	2	30	0.0526316	3	30	0.125	0.117763	0.110526	0.103289	0.0960526	0.0888158
	BOTCHWAY JEMIMA ATSWEI	Female	3	20	0.0526316	4	20	0.111111	0.105263	0.0994152	0.0935673	0.0877193	0.0818713
	BOTCHWAY MICHAEL	Male	2	10	0.0175439	3	10	0.0416667	0.0392544	0.0368421	0.0344298	0.0320175	0.0296053
26	ADDISON EMMANUEL	Male
	BOYETEY SOLOMON BUERNOR	Male	2	15	0.0263158	3	15	0.0625	0.0588816	0.0552632	0.0516447	0.0480263	0.0444079
	BRENYAH SYLVESTER	Male	6	40	0.210526	7	40	0.388889	0.371053	0.353216	0.33538	0.317544	0.299708
	CLELAND VERA VASTU	Female	2	20	0.0350877	2	20	0.0555556	0.0535088	0.051462	0.0494152	0.0473684	0.0453216
27	ADDISON STEPHEN EBO	Male
	DADZIE ISAAC	Male	1	40	0.0350877	1	40	0.0555556	0.0535088	0.051462	0.0494152	0.0473684	0.0453216
	DAMALIE DEBORAH YAYRA	Female	1	50	0.0438596	1	50	0.0694444	0.066886	0.0643275	0.061769	0.0592105	0.056652
	DARKO MOSES	Male	6	25	0.131579	6	25	0.208333	0.200658	0.192982	0.185307	0.177632	0.169956
28	ADDO NAOMI	Female
	DARKOA DORA	Female	2	40	0.0701754	2	40	0.111111	0.107018	0.102924	0.0988304	0.0947368	0.0906433
	DENTAAH AMPOFO PATIENCE O.	Female	2	20	0.0350877	2	20	0.0555556	0.0535088	0.051462	0.0494152	0.0473684	0.0453216
	DJIDONU DANIEL KWESI	Male	2	30	0.0526316	2	30	0.0833333	0.0802632	0.077193	0.0741228	0.0710526	0.0679825
29	ADDO PATIENCE	Female
	DOE KENNEDY	Male	1	10	0.00877193	1	10	0.0138889	0.0133772	0.0128655	0.0123538	0.0118421	0.0113304
	DOKU ESTHER MAKU	Female	2	20	0.0350877	2	20	0.0555556	0.0535088	0.051462	0.0494152	0.0473684	0.0453216
	DOWUONA PRISCILLA NORKAI	Female	2	30	0.0526316	2	30	0.0833333	0.0802632	0.077193	0.0741228	0.0710526	0.0679825
30	ADDY MELIORA GENEVIEVE	Female
	DZRAMADO SANDRA	Female	2	40	0.0701754	2	40	0.111111	0.107018	0.102924	0.0988304	0.0947368	0.0906433
	DZUFLE BRIDGET	Female	5	50	0.219298	5	50	0.347222	0.33443	0.321637	0.308845	0.296053	0.28326
	EDZEOU BERNARD	Male	6	60	0.315789	6	60	0.5	0.481579	0.463158	0.444737	0.426316	0.407895
31	ADEKPUITOR PETER	Male
	ENTSIEH EVANS	Male	6	70	0.368421	6	70	0.583333	0.561842	0.540351	0.51886	0.497368	0.475877
	FOMETU GLADYS COURINE	Female	3	80	0.210526	3	80	0.333333	0.321053	0.308772	0.296491	0.284211	0.27193
	GANYO REBECCA EYRAM	Female	2	10	0.0175439	2	10	0.0277778	0.0267544	0.025731	0.0247076	0.0236842	0.0226608
32	ADEKU CALEB KOJO	Male
	GBADGO CHARLOTTE	Female	2	5	0.00877193	2	5	0.0138889	0.0133772	0.0128655	0.0123538	0.0118421	0.0113304
	GODOMEY ABRAHAM	Male	2	10	0.0175439	2	10	0.0277778	0.0267544	0.025731	0.0247076	0.0236842	0.0226608
	GYAN FELICIA	Female	2	15	0.0263158	2	15	0.0416667	0.0401316	0.0385965	0.0370614	0.0355263	0.0339912
33	ADETI CLIFFORD KWABLA	Male
	GYAN MANTEY	Male	2	20	0.0350877	2	20	0.0555556	0.0535088	0.051462	0.0494152	0.0473684	0.0453216
	GYEKYE EMMANUEL	Male	3	25	0.0657895	3	25	0.104167	0.100329	0.0964912	0.0926535	0.0888158	0.0849781
	HAGAN EDWIN EBOH	Male	2	30	0.0526316	2	30	0.0833333	0.0802632	0.077193	0.0741228	0.0710526	0.0679825
34	ADINKRAH ABIGAIL	Female
	HAMMOND NATHANIEL	Male	5	35	0.153509	5	35	0.243056	0.234101	0.225146	0.216192	0.207237	0.198282
	IBRAHIM MOHAMMED SANUSI	Male	3	40	0.105263	3	40	0.166667	0.160526	0.154386	0.148246	0.142105	0.135965
	IBRAHIM SEMIRATU	Female	5	45	0.197368	5	45	0.3125	0.300987	0.289474	0.277961	0.266447	0.254934
35	ADIOK JOSHUA ALLEN	Male
	INUSAH MOHAMMED	Male	3	50	0.131579	3	50	0.208333	0.200658	0.192982	0.185307	0.177632	0.169956
	KABAH ALIAYIRE ALEX	Male	4	55	0.192982	4	55	0.305556	0.294298	0.283041	0.271784	0.260526	0.249269
	KELVIN NKANSAH	Male	3	60	0.157895	3	60	0.25	0.240789	0.231579	0.222368	0.213158	0.203947
36	ADJAKLOE FLOSSIE DZIFA	Female
	KUDJUH BRIGHT DOSU	Male	2	65	0.114035	2	65	0.180556	0.173904	0.167251	0.160599	0.153947	0.147295
	KUMI DANIEL DARKO	Male	1	70	0.0614035	1	70	0.0972222	0.0936404	0.0900585	0.0864766	0.0828947	0.0793129
	KUMI MARY POKUAA	Female	2	5	0.00877193	2	5	0.0138889	0.0133772	0.0128655	0.0123538	0.0118421	0.0113304
37	ADJASOO LINDA SELINAM	Female
	KUSI LYDIA ADJOA ADJEIWAA	Female	4	10	0.0350877	4	10	0.0555556	0.0535088	0.051462	0.0494152	0.0473684	0.0453216
	KWARTENG JESSE SARPONG	Male	5	20	0.0877193	5	20	0.138889	0.133772	0.128655	0.123538	0.118421	0.113304
	LANTEI- LAMPTEY JESSE NII	Male	2	20	0.0350877	2	20	0.0555556	0.0535088	0.051462	0.0494152	0.0473684	0.0453216
38	ADJEI - BAAH STEPHEN	Male
	MASOPEH FELICIA VANILLA NAA AMELEY	Female	4	25	0.0877193	4	25	0.138889	0.133772	0.128655	0.123538	0.118421	0.113304
	MENDS FIDELIA APPIAH	Female	3	30	0.0789474	3	30	0.125	0.120395	0.115789	0.111184	0.106579	0.101974
	MENSAH BETTY TELUS	Female	2	35	0.0614035	2	35	0.0972222	0.0936404	0.0900585	0.0864766	0.0828947	0.0793129
39	ADJEI BELINDA ADJETEY	Female
	MENSAH CHARLES GYAMFI	Male	2	10	0.0175439	2	6	0.0166667	0.0167544	0.0168421	0.0169298	0.0170175	0.0171053
	MENSAH PHILOMINA TECHIE	Female	3	15	0.0394737	3	12	0.05	0.0489474	0.0478947	0.0468421	0.0457895	0.0447368
	MENYE GODWIN JR	Male	3	20	0.0526316	3	18	0.075	0.0727632	0.0705263	0.0682895	0.0660526	0.0638158
40	ADJEI DANIEL	Male
	MOHAMMED ADAM ZAKIYU	Male	3	25	0.0657895	3	25	0.104167	0.100329	0.0964912	0.0926535	0.0888158	0.0849781
	NARTEH GEOFFREY	Male	2	25	0.0438596	2	30	0.0833333	0.079386	0.0754386	0.0714912	0.0675439	0.0635965
	NKANSAH LOCTUS ADJEI	Female	1	30	0.0263158	1	30	0.0416667	0.0401316	0.0385965	0.0370614	0.0355263	0.0339912
41	ADJEI HENRY	Male
	NORTEY NICHOLAS	Male	5	10	0.0438596	5	10	0.0694444	0.066886	0.0643275	0.061769	0.0592105	0.056652
	NUAMAH SAMUEL	Male	2	60	0.105263	2	60	0.166667	0.160526	0.154386	0.148246	0.142105	0.135965
	NUKPE DAVID CONVERY	Male	7	65	0.399123	7	65	0.631944	0.608662	0.58538	0.562098	0.538816	0.515534
42	ADJEI JENNIFER ODUA	Female
	NYARKO ANISA	Female	2	30	0.0526316	2	30	0.0833333	0.0802632	0.077193	0.0741228	0.0710526	0.0679825
	NYARKO NICHOLAS	Male	2	35	0.0614035	2	35	0.0972222	0.0936404	0.0900585	0.0864766	0.0828947	0.0793129
	NYARKO WILLIAM KWABENA	Male	1	25	0.0219298	1	25	0.0347222	0.033443	0.0321637	0.0308845	0.0296053	0.028326
43	ADJEIBEA RACHEAL	Female
	NYEDU ISHMAEL	Male	4	10	0.0350877	4	10	0.0555556	0.0535088	0.051462	0.0494152	0.0473684	0.0453216
	OBENG JULIANA	Female	3	30	0.0789474	3	30	0.125	0.120395	0.115789	0.111184	0.106579	0.101974
	OBUOBI SOLOMON	Male	3	45	0.118421	3	45	0.1875	0.180592	0.173684	0.166776	0.159868	0.152961
44	ADJETEY ERAMI NII ADJEI	Male
	ODOI ERIC AKO	Male	5	35	0.153509	5	35	0.243056	0.234101	0.225146	0.216192	0.207237	0.198282
	OFFEI OSEI FRANCIS	Male	4	65	0.22807	4	65	0.361111	0.347807	0.334503	0.321199	0.307895	0.294591
	OPOKU SAMUEL	Male	2	50	0.0877193	2	50	0.138889	0.133772	0.128655	0.123538	0.118421	0.113304
45	ADJIN-TETTEY JEREMIAH	Male
	OPOKUA GIFTY NANA AMA	Female	2	30	0.0526316	2	30	0.0833333	0.0802632	0.077193	0.0741228	0.0710526	0.0679825
	OSEI RICHMOND KOFI	Male	3	20	0.0526316	3	20	0.0833333	0.0802632	0.077193	0.0741228	0.0710526	0.0679825
	OUEDORAOGO ROGER PETER	Male	6	10	0.0526316	6	10	0.0833333	0.0802632	0.077193	0.0741228	0.0710526	0.0679825
46	ADJOKATSE BERNICE	Female
	OWUSU ALEX	Male	4	15	0.0526316	4	15	0.0833333	0.0802632	0.077193	0.0741228	0.0710526	0.0679825
	OWUSU-APENTENG STEPHEN	Male	3	40	0.105263	3	40	0.166667	0.160526	0.154386	0.148246	0.142105	0.135965
	PARRY JESSICA	Male	2	20	0.0350877	2	20	0.0555556	0.0535088	0.051462	0.0494152	0.0473684	0.0453216
47	ADOM JENNIFER ESTHER OHENEBA	Female
	QUAICOE ENOCH	Male	2	40	0.0701754	2	40	0.111111	0.107018	0.102924	0.0988304	0.0947368	0.0906433
	QUANSAH BELINDA	Female	3	50	0.131579	3	50	0.208333	0.200658	0.192982	0.185307	0.177632	0.169956
	QUARTEY EVELYN NAA KWARLEY	Female	7	25	0.153509	7	25	0.243056	0.234101	0.225146	0.216192	0.207237	0.198282
48	ADOM KWADWO BOAKYE	Male
	QUARTEY SALOMEY	Female	2	40	0.0701754	2	40	0.111111	0.107018	0.102924	0.0988304	0.0947368	0.0906433
	SAHEED AZEEZAT	Female	2	20	0.0350877	2	20	0.0555556	0.0535088	0.051462	0.0494152	0.0473684	0.0453216
	SHAIBU FAUZIYATU	Female	2	30	0.0526316	2	30	0.0833333	0.0802632	0.077193	0.0741228	0.0710526	0.0679825
49	ADU BONA SUSANNA	Female
	SOWAH ALEXANDRA ENYONAM	Female	4	10	0.0350877	4	10	0.0555556	0.0535088	0.051462	0.0494152	0.0473684	0.0453216
	SULLEY HINDU MUNIRU	Female	3	20	0.0526316	3	20	0.0833333	0.0802632	0.077193	0.0741228	0.0710526	0.0679825
	TAGOE DAVID	Male	4	30	0.105263	4	30	0.166667	0.160526	0.154386	0.148246	0.142105	0.135965
50	ADU DORA	Female
	TAWIAH ADAMA OKOE	Male	2	40	0.0701754	2	40	0.111111	0.107018	0.102924	0.0988304	0.0947368	0.0906433
	TETTEH KELVIN	Male	3	50	0.131579	3	50	0.208333	0.200658	0.192982	0.185307	0.177632	0.169956
	TETTEH MALVIN	Male	4	60	0.210526	4	60	0.333333	0.321053	0.308772	0.296491	0.284211	0.27193
51	ADU PRISCILLA NKETIA	Female
	WADIE LINDA NKANSAH	Female	5	70	0.307018	5	70	0.486111	0.468202	0.450292	0.432383	0.414474	0.396564
	WENOMA LINDA	Female	3	80	0.210526	3	80	0.333333	0.321053	0.308772	0.296491	0.284211	0.27193
	YARTEY SEFIATU	Female	2	10	0.0175439	2	10	0.0277778	0.0267544	0.025731	0.0247076	0.0236842	0.0226608
52	ADU-AGYEI AWURA AKUA	Female
	OWUSU ALEX	Male	2	5	0.00877193	2	5	0.0138889	0.0133772	0.0128655	0.0123538	0.0118421	0.0113304
	OWUSU-APENTENG STEPHEN	Male	2	10	0.0175439	2	10	0.0277778	0.0267544	0.025731	0.0247076	0.0236842	0.0226608
	PARRY JESSICA	Male	3	15	0.0394737	3	15	0.0625	0.0601974	0.0578947	0.0555921	0.0532895	0.0509868
53	ADU-TWUM FREDERICK ASANTE	Male
	QUAICOE ENOCH	Male	2	20	0.0350877	2	20	0.0555556	0.0535088	0.051462	0.0494152	0.0473684	0.0453216
	QUANSAH BELINDA	Female	2	25	0.0438596	2	25	0.0694444	0.066886	0.0643275	0.061769	0.0592105	0.056652
	QUARTEY EVELYN NAA KWARLEY	Female	3	30	0.0789474	3	30	0.125	0.120395	0.115789	0.111184	0.106579	0.101974
54	ADUSEI GIFTY YEBOAH	Female
	QUARTEY SALOMEY	Female	2	35	0.0614035	2	35	0.0972222	0.0936404	0.0900585	0.0864766	0.0828947	0.0793129
	SAHEED AZEEZAT	Female	3	40	0.105263	3	40	0.166667	0.160526	0.154386	0.148246	0.142105	0.135965
	SHAIBU FAUZIYATU	Female	2	45	0.0789474	2	45	0.125	0.120395	0.115789	0.111184	0.106579	0.101974
55	ADUUM REBECCA	Female
	AFARI STEPHEN	Male	2	50	0.0877193	2	50	0.138889	0.133772	0.128655	0.123538	0.118421	0.113304
	AFOTEY PATRICK DUNYO	Male	3	55	0.144737	3	55	0.229167	0.220724	0.212281	0.203838	0.195395	0.186952
	AFRAH TRACY NTOW	Female	2	60	0.105263	2	60	0.166667	0.160526	0.154386	0.148246	0.142105	0.135965
56	ABABIO ABEDNEGO A.	Male
	ABOAGYE ELIZABETH BOADIWAA	Female	7	10	0.0614035	6	10	0.0833333	0.0811404	0.0789474	0.0767544	0.0745614	0.0723684
	ABOE ANDREWS	Male	5	60	0.263158	4	60	0.333333	0.326316	0.319298	0.312281	0.305263	0.298246
	ABRAHAM-QUANSAH MARY EVA	Female	4	65	0.22807	3	65	0.270833	0.266557	0.262281	0.258004	0.253728	0.249452
57	ABALEM JENNIFER	Female
	ADDAE SANDRA	Female	4	30	0.105263	1	30	0.0416667	0.0480263	0.054386	0.0607456	0.0671053	0.0734649
	ADJEI FREDERICK YAW	Male	5	35	0.153509	2	35	0.0972222	0.102851	0.10848	0.114108	0.119737	0.125365
	ADJEI PRINCE BAFFOUR	Male	6	25	0.131579	1	25	0.0347222	0.0444079	0.0540936	0.0637792	0.0734649	0.0831506
58	ABBAN VIDA OWUSU	Female
	ADJEI SAMUEL	Male	7	50	0.307018	2	10	0.0277778	0.0557018	0.0836257	0.11155	0.139474	0.167398
	ADJORLOLO MERCY NORKPLIM	Female	4	30	0.105263	3	30	0.125	0.123026	0.121053	0.119079	0.117105	0.115132
	ADOCTOR VICTORIA	Female	5	45	0.197368	4	45	0.25	0.244737	0.239474	0.234211	0.228947	0.223684
59	ADU AFRIYIE	Male
	ADU EMMANUEL	Male	7	35	0.214912	6	35	0.291667	0.283991	0.276316	0.26864	0.260965	0.253289
	ADZOWU MILLICENT	Female	1	5	0.00438596	2	65	0.180556	0.162939	0.145322	0.127705	0.110088	0.0924708
	AFORDE JAMES ABLORDE	Male	2	50	0.0877193	2	50	0.138889	0.133772	0.128655	0.123538	0.118421	0.113304
60	ABDALLAH FATIMATU	Female
	AGBENYEGA STEPHEN	Male	4	30	0.105263	3	30	0.125	0.123026	0.121053	0.119079	0.117105	0.115132
	AGBOGBA LANDRY KWAME	Male	5	20	0.0877193	4	20	0.111111	0.108772	0.106433	0.104094	0.101754	0.0994152
	AGGERH BARNABAS KOBBY	Male	6	10	0.0526316	5	10	0.0694444	0.0677632	0.0660819	0.0644006	0.0627193	0.061038
61	ABDULAI FAIZA	Female
	AGOE JEHOSHAPHAT SOWAH	Male	2	15	0.0263158	1	15	0.0208333	0.0213816	0.0219298	0.0224781	0.0230263	0.0235746
	AGUDA NARKIE PATRICIA	Female	3	40	0.105263	2	40	0.111111	0.110526	0.109942	0.109357	0.108772	0.108187
	AGYARE PRISCILLA DARFOUR	Female	2	20	0.0350877	1	20	0.0277778	0.0285088	0.0292398	0.0299708	0.0307018	0.0314327
62	ABEKAH EMMANUEL	Male
	AGYEI RICHARD KWAME	Male	4	40	0.140351	1	40	0.0555556	0.0640351	0.0725146	0.0809942	0.0894737	0.0979532
	AGYEMAN DUAH BOATEMAA	Female	4	50	0.175439	2	50	0.138889	0.142544	0.146199	0.149854	0.153509	0.157164
	AGYEMAN PAUL BOAKYE	Male	3	25	0.0657895	1	25	0.0347222	0.0378289	0.0409357	0.0440424	0.0471491	0.0502558
63	ABOAGYE DAVID ADU	Male
	AGYIRI GEORGINA	Female	3	40	0.105263	1	40	0.0555556	0.0605263	0.0654971	0.0704678	0.0754386	0.0804094
	AHIABLEY PORTIA	Female	4	20	0.0701754	2	20	0.0555556	0.0570175	0.0584795	0.0599415	0.0614035	0.0628655
	AHONI MAUDLIN AYONGO	Female	4	30	0.105263	2	30	0.0833333	0.0855263	0.0877193	0.0899123	0.0921053	0.0942982
64	ABOAGYE FELIX	Male
	AKAGBO REBECCA	Female	4	30	0.105263	1	10	0.0138889	0.0230263	0.0321637	0.0413012	0.0504386	0.059576
	AKOTO REINDOLF APPIAH	Male	2	20	0.0350877	4	20	0.111111	0.103509	0.0959064	0.0883041	0.0807018	0.0730994
	AKUFFO GIDEON	Male	1	30	0.0263158	1	30	0.0416667	0.0401316	0.0385965	0.0370614	0.0355263	0.0339912
65	ABU ABDUL MANAF	Male
	ALAGBO EMMANUEL	Male	3	40	0.105263	2	40	0.111111	0.110526	0.109942	0.109357	0.108772	0.108187
	ALLOTEY KPAKPO VINCENT	Male	2	50	0.0877193	1	50	0.0694444	0.0712719	0.0730994	0.0749269	0.0767544	0.0785819
	ALLOTEY PEARL NAA AKU	Female	2	60	0.105263	1	60	0.0833333	0.0855263	0.0877193	0.0899123	0.0921053	0.0942982
66	ABUBAKAR ARAFAT SUFYAN	Male
	AMAKYE JAMES SARPONG	Male	7	70	0.429825	6	70	0.583333	0.567982	0.552632	0.537281	0.52193	0.506579
	AMEVOR ERIC	Male	5	80	0.350877	4	80	0.444444	0.435088	0.425731	0.416374	0.407018	0.397661
	AMOAH CHARLOTTE KORKOR	Female	4	10	0.0350877	3	10	0.0416667	0.0410088	0.0403509	0.039693	0.0390351	0.0383772
67	ACHEAMPONG CHRISTABEL	Female
	AMOAH MILDRED	Female	4	5	0.0175439	3	5	0.0208333	0.0205044	0.0201754	0.0198465	0.0195175	0.0191886
	AMOAKO ERNESTINA OPOKUA	Female	2	10	0.0175439	1	10	0.0138889	0.0142544	0.0146199	0.0149854	0.0153509	0.0157164
	AMPONSAH CECILIA ABENA	Female	1	15	0.0131579	1	15	0.0208333	0.0200658	0.0192982	0.0185307	0.0177632	0.0169956
68	ACHEAMPONG KINGSLEY	Male
	AMUZU STELLA KABUKI	Female	5	20	0.0877193	4	20	0.111111	0.108772	0.106433	0.104094	0.101754	0.0994152
	ANABI MUSAH AHMED	Male	6	25	0.131579	5	25	0.173611	0.169408	0.165205	0.161001	0.156798	0.152595
	ANDERSON GIFTY	Female	2	30	0.0526316	1	30	0.0416667	0.0427632	0.0438596	0.0449561	0.0460526	0.0471491
69	ACHEAMPONG MICHAEL APPIAH	Male
	ANDERSON VIVIAN	Female	3	35	0.0921053	2	35	0.0972222	0.0967105	0.0961988	0.0956871	0.0951754	0.0946637
	ANKOMAH GEORGINA	Female	3	40	0.105263	2	40	0.111111	0.110526	0.109942	0.109357	0.108772	0.108187
	ANNANG FRANCISCA TORSHIE	Female	2	45	0.0789474	1	45	0.0625	0.0641447	0.0657895	0.0674342	0.0690789	0.0707237
70	ACQUAH BENJAMIN	Male
	ANNOR RICHAEL	Female	2	50	0.0877193	1	50	0.0694444	0.0712719	0.0730994	0.0749269	0.0767544	0.0785819
	ANSAH FAUSTINA	Female	3	55	0.144737	2	55	0.152778	0.151974	0.15117	0.150365	0.149561	0.148757
	ANSAH MARFO DOREEN	Female	2	60	0.105263	1	60	0.0833333	0.0855263	0.0877193	0.0899123	0.0921053	0.0942982
71	ACQUAH KINGSLEY OCANSEY	Male
	ANTHONIO HENRIETTA	Female	3	65	0.171053	2	65	0.180556	0.179605	0.178655	0.177705	0.176754	0.175804
	APPIAH ISAAC	Male	2	70	0.122807	1	70	0.0972222	0.0997807	0.102339	0.104898	0.107456	0.110015
	APPIAH MOSES	Male	6	5	0.0263158	5	5	0.0347222	0.0338816	0.0330409	0.0322003	0.0313596	0.030519
72	ACQUAH PHILIP	Male
	APPIAH PRINCE KWESI	Male	2	20	0.0350877	3	10	0.0416667	0.0410088	0.0403509	0.039693	0.0390351	0.0383772
	ARKO HAGAR	Female	3	25	0.0657895	4	20	0.111111	0.106579	0.102047	0.0975146	0.0929825	0.0884503
	ARKOH GALAHAD AHINSAH	Female	2	20	0.0350877	3	20	0.0833333	0.0785088	0.0736842	0.0688596	0.0640351	0.0592105
73	ADAM HALIMATU SADIA	Female
	ARTHUR EBENEZER	Male	6	25	0.131579	4	25	0.138889	0.138158	0.137427	0.136696	0.135965	0.135234
	ARTHUR ESSUMAN JAMES	Male	6	30	0.157895	4	30	0.166667	0.165789	0.164912	0.164035	0.163158	0.162281
	ARYEETEY MESHACK	Male	4	35	0.122807	3	35	0.145833	0.143531	0.141228	0.138925	0.136623	0.13432
74	ADAMA-TETTEY MARYNSKY	Female
	ASABIRE SOPHIA	Female	4	30	0.105263	3	10	0.0416667	0.0480263	0.054386	0.0607456	0.0671053	0.0734649
	ASAHENE EMMANUELLA	Female	4	25	0.0877193	3	15	0.0625	0.0650219	0.0675439	0.0700658	0.0725877	0.0751096
	ASAMANY CARL	Male	6	15	0.0789474	4	20	0.111111	0.107895	0.104678	0.101462	0.0982456	0.0950292
75	ADAMS AFISHETU	Female
	ASAMOAH MERCY	Female	5	25	0.109649	4	25	0.138889	0.135965	0.133041	0.130117	0.127193	0.124269
	ASARE ERIC AGYIRI AWERE	Male	5	20	0.0877193	4	30	0.166667	0.158772	0.150877	0.142982	0.135088	0.127193
	ASHITEY MCZILL HAFIZ OKO	Male	2	30	0.0526316	3	25	0.104167	0.0990132	0.0938596	0.0887061	0.0835526	0.0783991
76	ADAMS ANASS	Male
	ASIEDU MAVIS	Female	1	10	0.00877193	2	10	0.0277778	0.0258772	0.0239766	0.022076	0.0201754	0.0182749
	ATIEMO JOSEPHINE	Female	1	60	0.0526316	2	60	0.166667	0.155263	0.14386	0.132456	0.121053	0.109649
	AWUDER WILLIAM YAO	Male	2	65	0.114035	3	65	0.270833	0.255154	0.239474	0.223794	0.208114	0.192434
77	ADARKWAH IRENE	Female
	AYER PERCY OKAI	Male	1	30	0.0263158	2	30	0.0833333	0.0776316	0.0719298	0.0662281	0.0605263	0.0548246
	AYISI BENJAMIN	Male	3	35	0.0921053	4	35	0.194444	0.184211	0.173977	0.163743	0.153509	0.143275
	AZAMETSI MIRABLE	Female	2	25	0.0438596	3	25	0.104167	0.098136	0.0921053	0.0860746	0.0800439	0.0740132
78	ADDAE PORTIA	Female
	BEDIAKO PRISCILLA ODURO	Female	4	10	0.0350877	5	10	0.0694444	0.0660088	0.0625731	0.0591374	0.0557018	0.0522661
	BELLEY BETTY	Female	1	30	0.0263158	2	30	0.0833333	0.0776316	0.0719298	0.0662281	0.0605263	0.0548246
	BOATEMAA SLYVIA	Female	2	45	0.0789474	3	45	0.1875	0.176645	0.165789	0.154934	0.144079	0.133224
79	ADDEY AUGUSTINE	Male
	BOATENG ABRAHAM AMEGAVIE	Male	2	35	0.0614035	3	35	0.145833	0.13739	0.128947	0.120504	0.112061	0.103618
	BONDZIE SAMUEL AIDOO	Male	3	65	0.171053	4	65	0.361111	0.342105	0.323099	0.304094	0.285088	0.266082
	BONI MAXWELL EDEM	Male	4	50	0.175439	5	50	0.347222	0.330044	0.312865	0.295687	0.278509	0.26133
80	ADDICO FRANCIS AWULEY	Male
	BOTCHWAY HANNAH	Female	2	30	0.0526316	3	30	0.125	0.117763	0.110526	0.103289	0.0960526	0.0888158
	BOTCHWAY JEMIMA ATSWEI	Female	3	20	0.0526316	4	20	0.111111	0.105263	0.0994152	0.0935673	0.0877193	0.0818713
	BOTCHWAY MICHAEL	Male	2	10	0.0175439	3	10	0.0416667	0.0392544	0.0368421	0.0344298	0.0320175	0.0296053
81	ADDISON EMMANUEL	Male
	BOYETEY SOLOMON BUERNOR	Male	2	15	0.0263158	3	15	0.0625	0.0588816	0.0552632	0.0516447	0.0480263	0.0444079
	BRENYAH SYLVESTER	Male	6	40	0.210526	7	40	0.388889	0.371053	0.353216	0.33538	0.317544	0.299708
	CLELAND VERA VASTU	Female	2	20	0.0350877	2	20	0.0555556	0.0535088	0.051462	0.0494152	0.0473684	0.0453216
82	ADDISON STEPHEN EBO	Male
	DADZIE ISAAC	Male	1	40	0.0350877	1	40	0.0555556	0.0535088	0.051462	0.0494152	0.0473684	0.0453216
	DAMALIE DEBORAH YAYRA	Female	1	50	0.0438596	1	50	0.0694444	0.066886	0.0643275	0.061769	0.0592105	0.056652
	DARKO MOSES	Male	6	25	0.131579	6	25	0.208333	0.200658	0.192982	0.185307	0.177632	0.169956
83	ADDO NAOMI	Female
	DARKOA DORA	Female	2	40	0.0701754	2	40	0.111111	0.107018	0.102924	0.0988304	0.0947368	0.0906433
	DENTAAH AMPOFO PATIENCE O.	Female	2	20	0.0350877	2	20	0.0555556	0.0535088	0.051462	0.0494152	0.0473684	0.0453216
	DJIDONU DANIEL KWESI	Male	2	30	0.0526316	2	30	0.0833333	0.0802632	0.077193	0.0741228	0.0710526	0.0679825
84	ADDO PATIENCE	Female
	DOE KENNEDY	Male	1	10	0.00877193	1	10	0.0138889	0.0133772	0.0128655	0.0123538	0.0118421	0.0113304
	DOKU ESTHER MAKU	Female	2	20	0.0350877	2	20	0.0555556	0.0535088	0.051462	0.0494152	0.0473684	0.0453216
	DOWUONA PRISCILLA NORKAI	Female	2	30	0.0526316	2	30	0.0833333	0.0802632	0.077193	0.0741228	0.0710526	0.0679825
85	ADDY MELIORA GENEVIEVE	Female
	DZRAMADO SANDRA	Female	2	40	0.0701754	2	40	0.111111	0.107018	0.102924	0.0988304	0.0947368	0.0906433
	DZUFLE BRIDGET	Female	5	50	0.219298	5	50	0.347222	0.33443	0.321637	0.308845	0.296053	0.28326
	EDZEOU BERNARD	Male	6	60	0.315789	6	60	0.5	0.481579	0.463158	0.444737	0.426316	0.407895
86	ADEKPUITOR PETER	Male
	ENTSIEH EVANS	Male	6	70	0.368421	6	70	0.583333	0.561842	0.540351	0.51886	0.497368	0.475877
	FOMETU GLADYS COURINE	Female	3	80	0.210526	3	80	0.333333	0.321053	0.308772	0.296491	0.284211	0.27193
	GANYO REBECCA EYRAM	Female	2	10	0.0175439	2	10	0.0277778	0.0267544	0.025731	0.0247076	0.0236842	0.0226608
87	ADEKU CALEB KOJO	Male
	GBADGO CHARLOTTE	Female	2	5	0.00877193	2	5	0.0138889	0.0133772	0.0128655	0.0123538	0.0118421	0.0113304
	GODOMEY ABRAHAM	Male	2	10	0.0175439	2	10	0.0277778	0.0267544	0.025731	0.0247076	0.0236842	0.0226608
	GYAN FELICIA	Female	2	15	0.0263158	2	15	0.0416667	0.0401316	0.0385965	0.0370614	0.0355263	0.0339912
88	ADETI CLIFFORD KWABLA	Male
	GYAN MANTEY	Male	2	20	0.0350877	2	20	0.0555556	0.0535088	0.051462	0.0494152	0.0473684	0.0453216
	GYEKYE EMMANUEL	Male	3	25	0.0657895	3	25	0.104167	0.100329	0.0964912	0.0926535	0.0888158	0.0849781
	HAGAN EDWIN EBOH	Male	2	30	0.0526316	2	30	0.0833333	0.0802632	0.077193	0.0741228	0.0710526	0.0679825
89	ADINKRAH ABIGAIL	Female
	HAMMOND NATHANIEL	Male	5	35	0.153509	5	35	0.243056	0.234101	0.225146	0.216192	0.207237	0.198282
	IBRAHIM MOHAMMED SANUSI	Male	3	40	0.105263	3	40	0.166667	0.160526	0.154386	0.148246	0.142105	0.135965
	IBRAHIM SEMIRATU	Female	5	45	0.197368	5	45	0.3125	0.300987	0.289474	0.277961	0.266447	0.254934
90	ADIOK JOSHUA ALLEN	Male
	INUSAH MOHAMMED	Male	3	50	0.131579	3	50	0.208333	0.200658	0.192982	0.185307	0.177632	0.169956
	KABAH ALIAYIRE ALEX	Male	4	55	0.192982	4	55	0.305556	0.294298	0.283041	0.271784	0.260526	0.249269
	KELVIN NKANSAH	Male	3	60	0.157895	3	60	0.25	0.240789	0.231579	0.222368	0.213158	0.203947
91	ADJAKLOE FLOSSIE DZIFA	Female
	KUDJUH BRIGHT DOSU	Male	2	65	0.114035	2	65	0.180556	0.173904	0.167251	0.160599	0.153947	0.147295
	KUMI DANIEL DARKO	Male	1	70	0.0614035	1	70	0.0972222	0.0936404	0.0900585	0.0864766	0.0828947	0.0793129
	KUMI MARY POKUAA	Female	2	5	0.00877193	2	5	0.0138889	0.0133772	0.0128655	0.0123538	0.0118421	0.0113304
92	ADJASOO LINDA SELINAM	Female
	KUSI LYDIA ADJOA ADJEIWAA	Female	4	10	0.0350877	4	10	0.0555556	0.0535088	0.051462	0.0494152	0.0473684	0.0453216
	KWARTENG JESSE SARPONG	Male	5	20	0.0877193	5	20	0.138889	0.133772	0.128655	0.123538	0.118421	0.113304
	LANTEI- LAMPTEY JESSE NII	Male	2	20	0.0350877	2	20	0.0555556	0.0535088	0.051462	0.0494152	0.0473684	0.0453216
93	ADJEI - BAAH STEPHEN	Male
	MASOPEH FELICIA VANILLA NAA AMELEY	Female	4	25	0.0877193	4	25	0.138889	0.133772	0.128655	0.123538	0.118421	0.113304
	MENDS FIDELIA APPIAH	Female	3	30	0.0789474	3	30	0.125	0.120395	0.115789	0.111184	0.106579	0.101974
	MENSAH BETTY TELUS	Female	2	35	0.0614035	2	35	0.0972222	0.0936404	0.0900585	0.0864766	0.0828947	0.0793129
94	ADJEI BELINDA ADJETEY	Female
	MENSAH CHARLES GYAMFI	Male	2	5	0.00877193	2	5	0.0138889	0.0133772	0.0128655	0.0123538	0.0118421	0.0113304
	MENSAH PHILOMINA TECHIE	Female	3	15	0.0394737	3	15	0.0625	0.0601974	0.0578947	0.0555921	0.0532895	0.0509868
	MENYE GODWIN JR	Male	3	20	0.0526316	3	20	0.0833333	0.0802632	0.077193	0.0741228	0.0710526	0.0679825
95	ADJEI DANIEL	Male
	MOHAMMED ADAM ZAKIYU	Male	3	20	0.0526316	3	25	0.104167	0.0990132	0.0938596	0.0887061	0.0835526	0.0783991
	NARTEH GEOFFREY	Male	2	25	0.0438596	2	20	0.0555556	0.054386	0.0532164	0.0520468	0.0508772	0.0497076
	NKANSAH LOCTUS ADJEI	Female	1	30	0.0263158	1	25	0.0347222	0.0338816	0.0330409	0.0322003	0.0313596	0.030519
96	ADJEI HENRY	Male
	NORTEY NICHOLAS	Male	5	10	0.0438596	5	10	0.0694444	0.066886	0.0643275	0.061769	0.0592105	0.056652
	NUAMAH SAMUEL	Male	2	60	0.105263	2	60	0.166667	0.160526	0.154386	0.148246	0.142105	0.135965
	NUKPE DAVID CONVERY	Male	7	65	0.399123	7	65	0.631944	0.608662	0.58538	0.562098	0.538816	0.515534
97	ADJEI JENNIFER ODUA	Female
	NYARKO ANISA	Female	2	30	0.0526316	2	30	0.0833333	0.0802632	0.077193	0.0741228	0.0710526	0.0679825
	NYARKO NICHOLAS	Male	2	35	0.0614035	2	35	0.0972222	0.0936404	0.0900585	0.0864766	0.0828947	0.0793129
	NYARKO WILLIAM KWABENA	Male	1	25	0.0219298	1	25	0.0347222	0.033443	0.0321637	0.0308845	0.0296053	0.028326
98	ADJEIBEA RACHEAL	Female
	NYEDU ISHMAEL	Male	4	10	0.0350877	4	10	0.0555556	0.0535088	0.051462	0.0494152	0.0473684	0.0453216
	OBENG JULIANA	Female	3	30	0.0789474	3	30	0.125	0.120395	0.115789	0.111184	0.106579	0.101974
	OBUOBI SOLOMON	Male	3	45	0.118421	3	45	0.1875	0.180592	0.173684	0.166776	0.159868	0.152961
99	ADJETEY ERAMI NII ADJEI	Male
	ODOI ERIC AKO	Male	5	35	0.153509	5	35	0.243056	0.234101	0.225146	0.216192	0.207237	0.198282
	OFFEI OSEI FRANCIS	Male	4	65	0.22807	4	65	0.361111	0.347807	0.334503	0.321199	0.307895	0.294591
	OPOKU SAMUEL	Male	2	50	0.0877193	2	50	0.138889	0.133772	0.128655	0.123538	0.118421	0.113304
100	ADJIN-TETTEY JEREMIAH	Male
	OPOKUA GIFTY NANA AMA	Female	2	30	0.0526316	2	30	0.0833333	0.0802632	0.077193	0.0741228	0.0710526	0.0679825
	OSEI RICHMOND KOFI	Male	3	20	0.0526316	3	20	0.0833333	0.0802632	0.077193	0.0741228	0.0710526	0.0679825
	OUEDORAOGO ROGER PETER	Male	6	10	0.0526316	6	10	0.0833333	0.0802632	0.077193	0.0741228	0.0710526	0.0679825
101	ADJOKATSE BERNICE	Female
	OWUSU ALEX	Male	4	15	0.0526316	4	15	0.0833333	0.0802632	0.077193	0.0741228	0.0710526	0.0679825
	OWUSU-APENTENG STEPHEN	Male	3	40	0.105263	3	40	0.166667	0.160526	0.154386	0.148246	0.142105	0.135965
	PARRY JESSICA	Male	2	20	0.0350877	2	20	0.0555556	0.0535088	0.051462	0.0494152	0.0473684	0.0453216
102	ADOM JENNIFER ESTHER OHENEBA	Female
	QUAICOE ENOCH	Male	2	40	0.0701754	2	40	0.111111	0.107018	0.102924	0.0988304	0.0947368	0.0906433
	QUANSAH BELINDA	Female	3	50	0.131579	3	50	0.208333	0.200658	0.192982	0.185307	0.177632	0.169956
	QUARTEY EVELYN NAA KWARLEY	Female	7	25	0.153509	7	25	0.243056	0.234101	0.225146	0.216192	0.207237	0.198282
103	ADOM KWADWO BOAKYE	Male
	QUARTEY SALOMEY	Female	2	40	0.0701754	2	40	0.111111	0.107018	0.102924	0.0988304	0.0947368	0.0906433
	SAHEED AZEEZAT	Female	2	20	0.0350877	2	20	0.0555556	0.0535088	0.051462	0.0494152	0.0473684	0.0453216
	SHAIBU FAUZIYATU	Female	2	30	0.0526316	2	30	0.0833333	0.0802632	0.077193	0.0741228	0.0710526	0.0679825
104	ADU BONA SUSANNA	Female
	SOWAH ALEXANDRA ENYONAM	Female	4	10	0.0350877	4	10	0.0555556	0.0535088	0.051462	0.0494152	0.0473684	0.0453216
	SULLEY HINDU MUNIRU	Female	3	20	0.0526316	3	20	0.0833333	0.0802632	0.077193	0.0741228	0.0710526	0.0679825
	TAGOE DAVID	Male	4	30	0.105263	4	30	0.166667	0.160526	0.154386	0.148246	0.142105	0.135965
105	ADU DORA	Female
	TAWIAH ADAMA OKOE	Male	2	40	0.0701754	2	40	0.111111	0.107018	0.102924	0.0988304	0.0947368	0.0906433
	TETTEH KELVIN	Male	3	50	0.131579	3	50	0.208333	0.200658	0.192982	0.185307	0.177632	0.169956
	TETTEH MALVIN	Male	4	60	0.210526	4	60	0.333333	0.321053	0.308772	0.296491	0.284211	0.27193
106	ADU PRISCILLA NKETIA	Female
	WADIE LINDA NKANSAH	Female	5	70	0.307018	5	70	0.486111	0.468202	0.450292	0.432383	0.414474	0.396564
	WENOMA LINDA	Female	3	80	0.210526	3	80	0.333333	0.321053	0.308772	0.296491	0.284211	0.27193
	YARTEY SEFIATU	Female	2	10	0.0175439	2	10	0.0277778	0.0267544	0.025731	0.0247076	0.0236842	0.0226608
107	ADU-AGYEI AWURA AKUA	Female
	OWUSU ALEX	Male	2	5	0.00877193	2	5	0.0138889	0.0133772	0.0128655	0.0123538	0.0118421	0.0113304
	OWUSU-APENTENG STEPHEN	Male	2	10	0.0175439	2	10	0.0277778	0.0267544	0.025731	0.0247076	0.0236842	0.0226608
	PARRY JESSICA	Male	3	15	0.0394737	3	15	0.0625	0.0601974	0.0578947	0.0555921	0.0532895	0.0509868
108	ADU-TWUM FREDERICK ASANTE	Male
	QUAICOE ENOCH	Male	2	20	0.0350877	2	20	0.0555556	0.0535088	0.051462	0.0494152	0.0473684	0.0453216
	QUANSAH BELINDA	Female	2	25	0.0438596	2	25	0.0694444	0.066886	0.0643275	0.061769	0.0592105	0.056652
	QUARTEY EVELYN NAA KWARLEY	Female	3	30	0.0789474	3	30	0.125	0.120395	0.115789	0.111184	0.106579	0.101974
109	ADUSEI GIFTY YEBOAH	Female
	QUARTEY SALOMEY	Female	2	35	0.0614035	2	35	0.0972222	0.0936404	0.0900585	0.0864766	0.0828947	0.0793129
	SAHEED AZEEZAT	Female	3	40	0.105263	3	40	0.166667	0.160526	0.154386	0.148246	0.142105	0.135965
	SHAIBU FAUZIYATU	Female	2	45	0.0789474	2	45	0.125	0.120395	0.115789	0.111184	0.106579	0.101974
110	ADUUM REBECCA	Female
	AFARI STEPHEN	Male	2	50	0.0877193	2	50	0.138889	0.133772	0.128655	0.123538	0.118421	0.113304
	AFOTEY PATRICK DUNYO	Male	3	55	0.144737	3	55	0.229167	0.220724	0.212281	0.203838	0.195395	0.186952
	AFRAH TRACY NTOW	Female	2	60	0.105263	2	60	0.166667	0.160526	0.154386	0.148246	0.142105	0.135965
111	ABABIO ABEDNEGO A.	Male
	ABOAGYE ELIZABETH BOADIWAA	Female	7	10	0.0614035	6	10	0.0833333	0.0811404	0.0789474	0.0767544	0.0745614	0.0723684
	ABOE ANDREWS	Male	5	60	0.263158	4	60	0.333333	0.326316	0.319298	0.312281	0.305263	0.298246
	ABRAHAM-QUANSAH MARY EVA	Female	4	65	0.22807	3	65	0.270833	0.266557	0.262281	0.258004	0.253728	0.249452
112	ABALEM JENNIFER	Female
	ADDAE SANDRA	Female	4	30	0.105263	1	30	0.0416667	0.0480263	0.054386	0.0607456	0.0671053	0.0734649
	ADJEI FREDERICK YAW	Male	5	35	0.153509	2	35	0.0972222	0.102851	0.10848	0.114108	0.119737	0.125365
	ADJEI PRINCE BAFFOUR	Male	6	25	0.131579	1	25	0.0347222	0.0444079	0.0540936	0.0637792	0.0734649	0.0831506
113	ABBAN VIDA OWUSU	Female
	ADJEI SAMUEL	Male	7	50	0.307018	2	10	0.0277778	0.0557018	0.0836257	0.11155	0.139474	0.167398
	ADJORLOLO MERCY NORKPLIM	Female	4	30	0.105263	3	30	0.125	0.123026	0.121053	0.119079	0.117105	0.115132
	ADOCTOR VICTORIA	Female	5	45	0.197368	4	45	0.25	0.244737	0.239474	0.234211	0.228947	0.223684
114	ADU AFRIYIE	Male
	ADU EMMANUEL	Male	7	35	0.214912	6	35	0.291667	0.283991	0.276316	0.26864	0.260965	0.253289
	ADZOWU MILLICENT	Female	1	10	0.00877193	2	65	0.180556	0.163377	0.146199	0.12902	0.111842	0.0946637
	AFORDE JAMES ABLORDE	Male	2	50	0.0877193	2	50	0.138889	0.133772	0.128655	0.123538	0.118421	0.113304
115	ABDALLAH FATIMATU	Female
	AGBENYEGA STEPHEN	Male	4	30	0.105263	3	30	0.125	0.123026	0.121053	0.119079	0.117105	0.115132
	AGBOGBA LANDRY KWAME	Male	5	20	0.0877193	4	20	0.111111	0.108772	0.106433	0.104094	0.101754	0.0994152
	AGGERH BARNABAS KOBBY	Male	6	10	0.0526316	5	10	0.0694444	0.0677632	0.0660819	0.0644006	0.0627193	0.061038
116	ABDULAI FAIZA	Female
	AGOE JEHOSHAPHAT SOWAH	Male	2	15	0.0263158	1	15	0.0208333	0.0213816	0.0219298	0.0224781	0.0230263	0.0235746
	AGUDA NARKIE PATRICIA	Female	3	40	0.105263	2	40	0.111111	0.110526	0.109942	0.109357	0.108772	0.108187
	AGYARE PRISCILLA DARFOUR	Female	2	20	0.0350877	1	20	0.0277778	0.0285088	0.0292398	0.0299708	0.0307018	0.0314327
117	ABEKAH EMMANUEL	Male
	AGYEI RICHARD KWAME	Male	4	40	0.140351	1	40	0.0555556	0.0640351	0.0725146	0.0809942	0.0894737	0.0979532
	AGYEMAN DUAH BOATEMAA	Female	4	50	0.175439	2	50	0.138889	0.142544	0.146199	0.149854	0.153509	0.157164
	AGYEMAN PAUL BOAKYE	Male	3	25	0.0657895	1	25	0.0347222	0.0378289	0.0409357	0.0440424	0.0471491	0.0502558
118	ABOAGYE DAVID ADU	Male
	AGYIRI GEORGINA	Female	3	40	0.105263	1	40	0.0555556	0.0605263	0.0654971	0.0704678	0.0754386	0.0804094
	AHIABLEY PORTIA	Female	4	20	0.0701754	2	20	0.0555556	0.0570175	0.0584795	0.0599415	0.0614035	0.0628655
	AHONI MAUDLIN AYONGO	Female	4	30	0.105263	2	30	0.0833333	0.0855263	0.0877193	0.0899123	0.0921053	0.0942982
119	ABOAGYE FELIX	Male
	AKAGBO REBECCA	Female	4	30	0.105263	1	10	0.0138889	0.0230263	0.0321637	0.0413012	0.0504386	0.059576
	AKOTO REINDOLF APPIAH	Male	2	20	0.0350877	4	20	0.111111	0.103509	0.0959064	0.0883041	0.0807018	0.0730994
	AKUFFO GIDEON	Male	1	30	0.0263158	1	30	0.0416667	0.0401316	0.0385965	0.0370614	0.0355263	0.0339912
120	ABU ABDUL MANAF	Male
	ALAGBO EMMANUEL	Male	3	40	0.105263	2	40	0.111111	0.110526	0.109942	0.109357	0.108772	0.108187
	ALLOTEY KPAKPO VINCENT	Male	2	50	0.0877193	1	50	0.0694444	0.0712719	0.0730994	0.0749269	0.0767544	0.0785819
	ALLOTEY PEARL NAA AKU	Female	2	60	0.105263	1	60	0.0833333	0.0855263	0.0877193	0.0899123	0.0921053	0.0942982
121	ABUBAKAR ARAFAT SUFYAN	Male
	AMAKYE JAMES SARPONG	Male	7	70	0.429825	6	70	0.583333	0.567982	0.552632	0.537281	0.52193	0.506579
	AMEVOR ERIC	Male	5	80	0.350877	4	80	0.444444	0.435088	0.425731	0.416374	0.407018	0.397661
	AMOAH CHARLOTTE KORKOR	Female	4	10	0.0350877	3	10	0.0416667	0.0410088	0.0403509	0.039693	0.0390351	0.0383772
122	ACHEAMPONG CHRISTABEL	Female
	AMOAH MILDRED	Female	4	5	0.0175439	3	5	0.0208333	0.0205044	0.0201754	0.0198465	0.0195175	0.0191886
	AMOAKO ERNESTINA OPOKUA	Female	2	10	0.0175439	1	10	0.0138889	0.0142544	0.0146199	0.0149854	0.0153509	0.0157164
	AMPONSAH CECILIA ABENA	Female	1	15	0.0131579	1	15	0.0208333	0.0200658	0.0192982	0.0185307	0.0177632	0.0169956
123	ACHEAMPONG KINGSLEY	Male
	AMUZU STELLA KABUKI	Female	5	20	0.0877193	4	20	0.111111	0.108772	0.106433	0.104094	0.101754	0.0994152
	ANABI MUSAH AHMED	Male	6	25	0.131579	5	25	0.173611	0.169408	0.165205	0.161001	0.156798	0.152595
	ANDERSON GIFTY	Female	2	30	0.0526316	1	30	0.0416667	0.0427632	0.0438596	0.0449561	0.0460526	0.0471491
124	ACHEAMPONG MICHAEL APPIAH	Male
	ANDERSON VIVIAN	Female	3	35	0.0921053	2	35	0.0972222	0.0967105	0.0961988	0.0956871	0.0951754	0.0946637
	ANKOMAH GEORGINA	Female	3	40	0.105263	2	40	0.111111	0.110526	0.109942	0.109357	0.108772	0.108187
	ANNANG FRANCISCA TORSHIE	Female	2	45	0.0789474	1	45	0.0625	0.0641447	0.0657895	0.0674342	0.0690789	0.0707237
125	ACQUAH BENJAMIN	Male
	ANNOR RICHAEL	Female	2	50	0.0877193	1	50	0.0694444	0.0712719	0.0730994	0.0749269	0.0767544	0.0785819
	ANSAH FAUSTINA	Female	3	55	0.144737	2	55	0.152778	0.151974	0.15117	0.150365	0.149561	0.148757
	ANSAH MARFO DOREEN	Female	2	60	0.105263	1	60	0.0833333	0.0855263	0.0877193	0.0899123	0.0921053	0.0942982
126	ACQUAH KINGSLEY OCANSEY	Male
	ANTHONIO HENRIETTA	Female	3	65	0.171053	2	65	0.180556	0.179605	0.178655	0.177705	0.176754	0.175804
	APPIAH ISAAC	Male	2	70	0.122807	1	70	0.0972222	0.0997807	0.102339	0.104898	0.107456	0.110015
	APPIAH MOSES	Male	6	5	0.0263158	5	5	0.0347222	0.0338816	0.0330409	0.0322003	0.0313596	0.030519
127	ACQUAH PHILIP	Male
	APPIAH PRINCE KWESI	Male	2	20	0.0350877	3	10	0.0416667	0.0410088	0.0403509	0.039693	0.0390351	0.0383772
	ARKO HAGAR	Female	3	25	0.0657895	4	20	0.111111	0.106579	0.102047	0.0975146	0.0929825	0.0884503
	ARKOH GALAHAD AHINSAH	Female	2	20	0.0350877	3	20	0.0833333	0.0785088	0.0736842	0.0688596	0.0640351	0.0592105
128	ADAM HALIMATU SADIA	Female
	ARTHUR EBENEZER	Male	6	25	0.131579	4	25	0.138889	0.138158	0.137427	0.136696	0.135965	0.135234
	ARTHUR ESSUMAN JAMES	Male	6	30	0.157895	4	30	0.166667	0.165789	0.164912	0.164035	0.163158	0.162281
	ARYEETEY MESHACK	Male	4	35	0.122807	3	35	0.145833	0.143531	0.141228	0.138925	0.136623	0.13432
129	ADAMA-TETTEY MARYNSKY	Female
	ASABIRE SOPHIA	Female	4	30	0.105263	3	10	0.0416667	0.0480263	0.054386	0.0607456	0.0671053	0.0734649
	ASAHENE EMMANUELLA	Female	4	25	0.0877193	3	15	0.0625	0.0650219	0.0675439	0.0700658	0.0725877	0.0751096
	ASAMANY CARL	Male	6	15	0.0789474	4	20	0.111111	0.107895	0.104678	0.101462	0.0982456	0.0950292
130	ADAMS AFISHETU	Female
	ASAMOAH MERCY	Female	5	20	0.0877193	4	25	0.138889	0.133772	0.128655	0.123538	0.118421	0.113304
	ASARE ERIC AGYIRI AWERE	Male	5	25	0.109649	4	20	0.111111	0.110965	0.110819	0.110673	0.110526	0.11038
	ASHITEY MCZILL HAFIZ OKO	Male	2	30	0.0526316	3	20	0.0833333	0.0802632	0.077193	0.0741228	0.0710526	0.0679825
131	ADAMS ANASS	Male
	ASIEDU MAVIS	Female	1	10	0.00877193	2	10	0.0277778	0.0258772	0.0239766	0.022076	0.0201754	0.0182749
	ATIEMO JOSEPHINE	Female	1	60	0.0526316	2	60	0.166667	0.155263	0.14386	0.132456	0.121053	0.109649
	AWUDER WILLIAM YAO	Male	2	65	0.114035	3	65	0.270833	0.255154	0.239474	0.223794	0.208114	0.192434
132	ADARKWAH IRENE	Female
	AYER PERCY OKAI	Male	1	30	0.0263158	2	30	0.0833333	0.0776316	0.0719298	0.0662281	0.0605263	0.0548246
	AYISI BENJAMIN	Male	3	35	0.0921053	4	35	0.194444	0.184211	0.173977	0.163743	0.153509	0.143275
	AZAMETSI MIRABLE	Female	2	25	0.0438596	3	25	0.104167	0.098136	0.0921053	0.0860746	0.0800439	0.0740132
133	ADDAE PORTIA	Female
	BEDIAKO PRISCILLA ODURO	Female	4	10	0.0350877	5	10	0.0694444	0.0660088	0.0625731	0.0591374	0.0557018	0.0522661
	BELLEY BETTY	Female	1	30	0.0263158	2	30	0.0833333	0.0776316	0.0719298	0.0662281	0.0605263	0.0548246
	BOATEMAA SLYVIA	Female	2	45	0.0789474	3	45	0.1875	0.176645	0.165789	0.154934	0.144079	0.133224
134	ADDEY AUGUSTINE	Male
	BOATENG ABRAHAM AMEGAVIE	Male	2	35	0.0614035	3	35	0.145833	0.13739	0.128947	0.120504	0.112061	0.103618
	BONDZIE SAMUEL AIDOO	Male	3	65	0.171053	4	65	0.361111	0.342105	0.323099	0.304094	0.285088	0.266082
	BONI MAXWELL EDEM	Male	4	50	0.175439	5	50	0.347222	0.330044	0.312865	0.295687	0.278509	0.26133
135	ADDICO FRANCIS AWULEY	Male
	BOTCHWAY HANNAH	Female	2	30	0.0526316	3	30	0.125	0.117763	0.110526	0.103289	0.0960526	0.0888158
	BOTCHWAY JEMIMA ATSWEI	Female	3	20	0.0526316	4	20	0.111111	0.105263	0.0994152	0.0935673	0.0877193	0.0818713
	BOTCHWAY MICHAEL	Male	2	10	0.0175439	3	10	0.0416667	0.0392544	0.0368421	0.0344298	0.0320175	0.0296053
136	ADDISON EMMANUEL	Male
	BOYETEY SOLOMON BUERNOR	Male	2	15	0.0263158	3	15	0.0625	0.0588816	0.0552632	0.0516447	0.0480263	0.0444079
	BRENYAH SYLVESTER	Male	6	40	0.210526	7	40	0.388889	0.371053	0.353216	0.33538	0.317544	0.299708
	CLELAND VERA VASTU	Female	2	20	0.0350877	2	20	0.0555556	0.0535088	0.051462	0.0494152	0.0473684	0.0453216
137	ADDISON STEPHEN EBO	Male
	DADZIE ISAAC	Male	1	40	0.0350877	1	40	0.0555556	0.0535088	0.051462	0.0494152	0.0473684	0.0453216
	DAMALIE DEBORAH YAYRA	Female	1	50	0.0438596	1	50	0.0694444	0.066886	0.0643275	0.061769	0.0592105	0.056652
	DARKO MOSES	Male	6	25	0.131579	6	25	0.208333	0.200658	0.192982	0.185307	0.177632	0.169956
138	ADDO NAOMI	Female
	DARKOA DORA	Female	2	40	0.0701754	2	40	0.111111	0.107018	0.102924	0.0988304	0.0947368	0.0906433
	DENTAAH AMPOFO PATIENCE O.	Female	2	20	0.0350877	2	20	0.0555556	0.0535088	0.051462	0.0494152	0.0473684	0.0453216
	DJIDONU DANIEL KWESI	Male	2	30	0.0526316	2	30	0.0833333	0.0802632	0.077193	0.0741228	0.0710526	0.0679825
139	ADDO PATIENCE	Female
	DOE KENNEDY	Male	1	10	0.00877193	1	10	0.0138889	0.0133772	0.0128655	0.0123538	0.0118421	0.0113304
	DOKU ESTHER MAKU	Female	2	20	0.0350877	2	20	0.0555556	0.0535088	0.051462	0.0494152	0.0473684	0.0453216
	DOWUONA PRISCILLA NORKAI	Female	2	30	0.0526316	2	30	0.0833333	0.0802632	0.077193	0.0741228	0.0710526	0.0679825
140	ADDY MELIORA GENEVIEVE	Female
	DZRAMADO SANDRA	Female	2	40	0.0701754	2	40	0.111111	0.107018	0.102924	0.0988304	0.0947368	0.0906433
	DZUFLE BRIDGET	Female	5	50	0.219298	5	50	0.347222	0.33443	0.321637	0.308845	0.296053	0.28326
	EDZEOU BERNARD	Male	6	60	0.315789	6	60	0.5	0.481579	0.463158	0.444737	0.426316	0.407895
141	ADEKPUITOR PETER	Male
	ENTSIEH EVANS	Male	6	70	0.368421	6	70	0.583333	0.561842	0.540351	0.51886	0.497368	0.475877
	FOMETU GLADYS COURINE	Female	3	80	0.210526	3	80	0.333333	0.321053	0.308772	0.296491	0.284211	0.27193
	GANYO REBECCA EYRAM	Female	2	10	0.0175439	2	10	0.0277778	0.0267544	0.025731	0.0247076	0.0236842	0.0226608
142	ADEKU CALEB KOJO	Male
	GBADGO CHARLOTTE	Female	2	5	0.00877193	2	5	0.0138889	0.0133772	0.0128655	0.0123538	0.0118421	0.0113304
	GODOMEY ABRAHAM	Male	2	10	0.0175439	2	10	0.0277778	0.0267544	0.025731	0.0247076	0.0236842	0.0226608
	GYAN FELICIA	Female	2	15	0.0263158	2	15	0.0416667	0.0401316	0.0385965	0.0370614	0.0355263	0.0339912
143	ADETI CLIFFORD KWABLA	Male
	GYAN MANTEY	Male	2	20	0.0350877	2	20	0.0555556	0.0535088	0.051462	0.0494152	0.0473684	0.0453216
	GYEKYE EMMANUEL	Male	3	25	0.0657895	3	25	0.104167	0.100329	0.0964912	0.0926535	0.0888158	0.0849781
	HAGAN EDWIN EBOH	Male	2	30	0.0526316	2	30	0.0833333	0.0802632	0.077193	0.0741228	0.0710526	0.0679825
144	ADINKRAH ABIGAIL	Female
	HAMMOND NATHANIEL	Male	5	35	0.153509	5	35	0.243056	0.234101	0.225146	0.216192	0.207237	0.198282
	IBRAHIM MOHAMMED SANUSI	Male	3	40	0.105263	3	40	0.166667	0.160526	0.154386	0.148246	0.142105	0.135965
	IBRAHIM SEMIRATU	Female	5	45	0.197368	5	45	0.3125	0.300987	0.289474	0.277961	0.266447	0.254934
145	ADIOK JOSHUA ALLEN	Male
	INUSAH MOHAMMED	Male	3	50	0.131579	3	50	0.208333	0.200658	0.192982	0.185307	0.177632	0.169956
	KABAH ALIAYIRE ALEX	Male	4	55	0.192982	4	55	0.305556	0.294298	0.283041	0.271784	0.260526	0.249269
	KELVIN NKANSAH	Male	3	60	0.157895	3	60	0.25	0.240789	0.231579	0.222368	0.213158	0.203947
146	ADJAKLOE FLOSSIE DZIFA	Female
	KUDJUH BRIGHT DOSU	Male	2	65	0.114035	2	65	0.180556	0.173904	0.167251	0.160599	0.153947	0.147295
	KUMI DANIEL DARKO	Male	1	70	0.0614035	1	70	0.0972222	0.0936404	0.0900585	0.0864766	0.0828947	0.0793129
	KUMI MARY POKUAA	Female	2	5	0.00877193	2	5	0.0138889	0.0133772	0.0128655	0.0123538	0.0118421	0.0113304
147	ADJASOO LINDA SELINAM	Female
	KUSI LYDIA ADJOA ADJEIWAA	Female	4	10	0.0350877	4	10	0.0555556	0.0535088	0.051462	0.0494152	0.0473684	0.0453216
	KWARTENG JESSE SARPONG	Male	5	20	0.0877193	5	20	0.138889	0.133772	0.128655	0.123538	0.118421	0.113304
	LANTEI- LAMPTEY JESSE NII	Male	2	20	0.0350877	2	20	0.0555556	0.0535088	0.051462	0.0494152	0.0473684	0.0453216
148	ADJEI - BAAH STEPHEN	Male
	MASOPEH FELICIA VANILLA NAA AMELEY	Female	4	25	0.0877193	4	25	0.138889	0.133772	0.128655	0.123538	0.118421	0.113304
	MENDS FIDELIA APPIAH	Female	3	30	0.0789474	3	30	0.125	0.120395	0.115789	0.111184	0.106579	0.101974
	MENSAH BETTY TELUS	Female	2	35	0.0614035	2	35	0.0972222	0.0936404	0.0900585	0.0864766	0.0828947	0.0793129
149	ADJEI BELINDA ADJETEY	Female
	MENSAH CHARLES GYAMFI	Male	2	5	0.00877193	2	5	0.0138889	0.0133772	0.0128655	0.0123538	0.0118421	0.0113304
	MENSAH PHILOMINA TECHIE	Female	3	15	0.0394737	3	15	0.0625	0.0601974	0.0578947	0.0555921	0.0532895	0.0509868
	MENYE GODWIN JR	Male	3	20	0.0526316	3	20	0.0833333	0.0802632	0.077193	0.0741228	0.0710526	0.0679825
150	ADJEI DANIEL	Male
	MOHAMMED ADAM ZAKIYU	Male	3	25	0.0657895	3	25	0.104167	0.100329	0.0964912	0.0926535	0.0888158	0.0849781
	NARTEH GEOFFREY	Male	2	25	0.0438596	2	20	0.0555556	0.054386	0.0532164	0.0520468	0.0508772	0.0497076
	NKANSAH LOCTUS ADJEI	Female	1	30	0.0263158	1	25	0.0347222	0.0338816	0.0330409	0.0322003	0.0313596	0.030519
151	ADJEI HENRY	Male
	NORTEY NICHOLAS	Male	5	10	0.0438596	5	10	0.0694444	0.066886	0.0643275	0.061769	0.0592105	0.056652
	NUAMAH SAMUEL	Male	2	60	0.105263	2	60	0.166667	0.160526	0.154386	0.148246	0.142105	0.135965
	NUKPE DAVID CONVERY	Male	7	65	0.399123	7	65	0.631944	0.608662	0.58538	0.562098	0.538816	0.515534
152	ADJEI JENNIFER ODUA	Female
	NYARKO ANISA	Female	2	30	0.0526316	2	30	0.0833333	0.0802632	0.077193	0.0741228	0.0710526	0.0679825
	NYARKO NICHOLAS	Male	2	35	0.0614035	2	35	0.0972222	0.0936404	0.0900585	0.0864766	0.0828947	0.0793129
	NYARKO WILLIAM KWABENA	Male	1	25	0.0219298	1	25	0.0347222	0.033443	0.0321637	0.0308845	0.0296053	0.028326
153	ADJEIBEA RACHEAL	Female
	NYEDU ISHMAEL	Male	4	10	0.0350877	4	10	0.0555556	0.0535088	0.051462	0.0494152	0.0473684	0.0453216
	OBENG JULIANA	Female	3	30	0.0789474	3	30	0.125	0.120395	0.115789	0.111184	0.106579	0.101974
	OBUOBI SOLOMON	Male	3	45	0.118421	3	45	0.1875	0.180592	0.173684	0.166776	0.159868	0.152961
154	ADJETEY ERAMI NII ADJEI	Male
	ODOI ERIC AKO	Male	5	35	0.153509	5	35	0.243056	0.234101	0.225146	0.216192	0.207237	0.198282
	OFFEI OSEI FRANCIS	Male	4	65	0.22807	4	65	0.361111	0.347807	0.334503	0.321199	0.307895	0.294591
	OPOKU SAMUEL	Male	2	50	0.0877193	2	50	0.138889	0.133772	0.128655	0.123538	0.118421	0.113304
155	ADJIN-TETTEY JEREMIAH	Male
	OPOKUA GIFTY NANA AMA	Female	2	30	0.0526316	2	30	0.0833333	0.0802632	0.077193	0.0741228	0.0710526	0.0679825
	OSEI RICHMOND KOFI	Male	3	20	0.0526316	3	20	0.0833333	0.0802632	0.077193	0.0741228	0.0710526	0.0679825
	OUEDORAOGO ROGER PETER	Male	6	10	0.0526316	6	10	0.0833333	0.0802632	0.077193	0.0741228	0.0710526	0.0679825
156	ADJOKATSE BERNICE	Female
	OWUSU ALEX	Male	4	15	0.0526316	4	15	0.0833333	0.0802632	0.077193	0.0741228	0.0710526	0.0679825
	OWUSU-APENTENG STEPHEN	Male	3	40	0.105263	3	40	0.166667	0.160526	0.154386	0.148246	0.142105	0.135965
	PARRY JESSICA	Male	2	20	0.0350877	2	20	0.0555556	0.0535088	0.051462	0.0494152	0.0473684	0.0453216
157	ADOM JENNIFER ESTHER OHENEBA	Female
	QUAICOE ENOCH	Male	2	40	0.0701754	2	40	0.111111	0.107018	0.102924	0.0988304	0.0947368	0.0906433
	QUANSAH BELINDA	Female	3	50	0.131579	3	50	0.208333	0.200658	0.192982	0.185307	0.177632	0.169956
	QUARTEY EVELYN NAA KWARLEY	Female	7	25	0.153509	7	25	0.243056	0.234101	0.225146	0.216192	0.207237	0.198282
158	ADOM KWADWO BOAKYE	Male
	QUARTEY SALOMEY	Female	2	40	0.0701754	2	40	0.111111	0.107018	0.102924	0.0988304	0.0947368	0.0906433
	SAHEED AZEEZAT	Female	2	20	0.0350877	2	20	0.0555556	0.0535088	0.051462	0.0494152	0.0473684	0.0453216
	SHAIBU FAUZIYATU	Female	2	30	0.0526316	2	30	0.0833333	0.0802632	0.077193	0.0741228	0.0710526	0.0679825
159	ADU BONA SUSANNA	Female
	SOWAH ALEXANDRA ENYONAM	Female	4	10	0.0350877	4	10	0.0555556	0.0535088	0.051462	0.0494152	0.0473684	0.0453216
	SULLEY HINDU MUNIRU	Female	3	20	0.0526316	3	20	0.0833333	0.0802632	0.077193	0.0741228	0.0710526	0.0679825
	TAGOE DAVID	Male	4	30	0.105263	4	30	0.166667	0.160526	0.154386	0.148246	0.142105	0.135965
160	ADU DORA	Female
	TAWIAH ADAMA OKOE	Male	2	40	0.0701754	2	40	0.111111	0.107018	0.102924	0.0988304	0.0947368	0.0906433
	TETTEH KELVIN	Male	3	50	0.131579	3	50	0.208333	0.200658	0.192982	0.185307	0.177632	0.169956
	TETTEH MALVIN	Male	4	60	0.210526	4	60	0.333333	0.321053	0.308772	0.296491	0.284211	0.27193
161	ADU PRISCILLA NKETIA	Female
	WADIE LINDA NKANSAH	Female	5	70	0.307018	5	70	0.486111	0.468202	0.450292	0.432383	0.414474	0.396564
	WENOMA LINDA	Female	3	80	0.210526	3	80	0.333333	0.321053	0.308772	0.296491	0.284211	0.27193
	YARTEY SEFIATU	Female	2	10	0.0175439	2	10	0.0277778	0.0267544	0.025731	0.0247076	0.0236842	0.0226608
162	ADU-AGYEI AWURA AKUA	Female
	OWUSU ALEX	Male	2	5	0.00877193	2	5	0.0138889	0.0133772	0.0128655	0.0123538	0.0118421	0.0113304
	OWUSU-APENTENG STEPHEN	Male	2	10	0.0175439	2	10	0.0277778	0.0267544	0.025731	0.0247076	0.0236842	0.0226608
	PARRY JESSICA	Male	3	15	0.0394737	3	15	0.0625	0.0601974	0.0578947	0.0555921	0.0532895	0.0509868
163	ADU-TWUM FREDERICK ASANTE	Male
	QUAICOE ENOCH	Male	2	20	0.0350877	2	20	0.0555556	0.0535088	0.051462	0.0494152	0.0473684	0.0453216
	QUANSAH BELINDA	Female	2	25	0.0438596	2	25	0.0694444	0.066886	0.0643275	0.061769	0.0592105	0.056652
	QUARTEY EVELYN NAA KWARLEY	Female	3	30	0.0789474	3	30	0.125	0.120395	0.115789	0.111184	0.106579	0.101974
164	ADUSEI GIFTY YEBOAH	Female
	QUARTEY SALOMEY	Female	2	35	0.0614035	2	35	0.0972222	0.0936404	0.0900585	0.0864766	0.0828947	0.0793129
	SAHEED AZEEZAT	Female	3	40	0.105263	3	40	0.166667	0.160526	0.154386	0.148246	0.142105	0.135965
	SHAIBU FAUZIYATU	Female	2	45	0.0789474	2	45	0.125	0.120395	0.115789	0.111184	0.106579	0.101974
165	ADUUM REBECCA	Female
	AFARI STEPHEN	Male	2	50	0.0877193	2	50	0.138889	0.133772	0.128655	0.123538	0.118421	0.113304
	AFOTEY PATRICK DUNYO	Male	3	55	0.144737	3	55	0.229167	0.220724	0.212281	0.203838	0.195395	0.186952
	AFRAH TRACY NTOW	Female	2	60	0.105263	2	60	0.166667	0.160526	0.154386	0.148246	0.142105	0.135965
166	ABABIO ABEDNEGO A.	Male
	ABOAGYE ELIZABETH BOADIWAA	Female	7	10	0.0614035	6	10	0.0833333	0.0811404	0.0789474	0.0767544	0.0745614	0.0723684
	ABOE ANDREWS	Male	5	60	0.263158	4	60	0.333333	0.326316	0.319298	0.312281	0.305263	0.298246
	ABRAHAM-QUANSAH MARY EVA	Female	4	65	0.22807	3	65	0.270833	0.266557	0.262281	0.258004	0.253728	0.249452
167	ABALEM JENNIFER	Female
	ADDAE SANDRA	Female	4	30	0.105263	1	30	0.0416667	0.0480263	0.054386	0.0607456	0.0671053	0.0734649
	ADJEI FREDERICK YAW	Male	5	35	0.153509	2	35	0.0972222	0.102851	0.10848	0.114108	0.119737	0.125365
	ADJEI PRINCE BAFFOUR	Male	6	25	0.131579	1	25	0.0347222	0.0444079	0.0540936	0.0637792	0.0734649	0.0831506
168	ABBAN VIDA OWUSU	Female
	ADJEI SAMUEL	Male	7	50	0.307018	2	10	0.0277778	0.0557018	0.0836257	0.11155	0.139474	0.167398
	ADJORLOLO MERCY NORKPLIM	Female	4	30	0.105263	3	30	0.125	0.123026	0.121053	0.119079	0.117105	0.115132
	ADOCTOR VICTORIA	Female	5	45	0.197368	4	45	0.25	0.244737	0.239474	0.234211	0.228947	0.223684
169	ADU AFRIYIE	Male
	ADU EMMANUEL	Male	7	35	0.214912	6	35	0.291667	0.283991	0.276316	0.26864	0.260965	0.253289
	ADZOWU MILLICENT	Female	1	4	0.00350877	2	65	0.180556	0.162851	0.145146	0.127442	0.109737	0.0920322
	AFORDE JAMES ABLORDE	Male	2	50	0.0877193	2	50	0.138889	0.133772	0.128655	0.123538	0.118421	0.113304
170	ABDALLAH FATIMATU	Female
	AGBENYEGA STEPHEN	Male	4	30	0.105263	3	30	0.125	0.123026	0.121053	0.119079	0.117105	0.115132
	AGBOGBA LANDRY KWAME	Male	5	20	0.0877193	4	20	0.111111	0.108772	0.106433	0.104094	0.101754	0.0994152
	AGGERH BARNABAS KOBBY	Male	6	10	0.0526316	5	10	0.0694444	0.0677632	0.0660819	0.0644006	0.0627193	0.061038
171	ABDULAI FAIZA	Female
	AGOE JEHOSHAPHAT SOWAH	Male	2	15	0.0263158	1	15	0.0208333	0.0213816	0.0219298	0.0224781	0.0230263	0.0235746
	AGUDA NARKIE PATRICIA	Female	3	40	0.105263	2	40	0.111111	0.110526	0.109942	0.109357	0.108772	0.108187
	AGYARE PRISCILLA DARFOUR	Female	2	20	0.0350877	1	20	0.0277778	0.0285088	0.0292398	0.0299708	0.0307018	0.0314327
172	ABEKAH EMMANUEL	Male
	AGYEI RICHARD KWAME	Male	4	40	0.140351	1	40	0.0555556	0.0640351	0.0725146	0.0809942	0.0894737	0.0979532
	AGYEMAN DUAH BOATEMAA	Female	4	50	0.175439	2	50	0.138889	0.142544	0.146199	0.149854	0.153509	0.157164
	AGYEMAN PAUL BOAKYE	Male	3	25	0.0657895	1	25	0.0347222	0.0378289	0.0409357	0.0440424	0.0471491	0.0502558
173	ABOAGYE DAVID ADU	Male
	AGYIRI GEORGINA	Female	3	40	0.105263	1	40	0.0555556	0.0605263	0.0654971	0.0704678	0.0754386	0.0804094
	AHIABLEY PORTIA	Female	4	20	0.0701754	2	20	0.0555556	0.0570175	0.0584795	0.0599415	0.0614035	0.0628655
	AHONI MAUDLIN AYONGO	Female	4	30	0.105263	2	30	0.0833333	0.0855263	0.0877193	0.0899123	0.0921053	0.0942982
174	ABOAGYE FELIX	Male
	AKAGBO REBECCA	Female	4	30	0.105263	1	10	0.0138889	0.0230263	0.0321637	0.0413012	0.0504386	0.059576
	AKOTO REINDOLF APPIAH	Male	2	20	0.0350877	4	20	0.111111	0.103509	0.0959064	0.0883041	0.0807018	0.0730994
	AKUFFO GIDEON	Male	1	30	0.0263158	1	30	0.0416667	0.0401316	0.0385965	0.0370614	0.0355263	0.0339912
175	ABU ABDUL MANAF	Male
	ALAGBO EMMANUEL	Male	3	40	0.105263	2	40	0.111111	0.110526	0.109942	0.109357	0.108772	0.108187
	ALLOTEY KPAKPO VINCENT	Male	2	50	0.0877193	1	50	0.0694444	0.0712719	0.0730994	0.0749269	0.0767544	0.0785819
	ALLOTEY PEARL NAA AKU	Female	2	60	0.105263	1	60	0.0833333	0.0855263	0.0877193	0.0899123	0.0921053	0.0942982
176	ABUBAKAR ARAFAT SUFYAN	Male
	AMAKYE JAMES SARPONG	Male	7	70	0.429825	6	70	0.583333	0.567982	0.552632	0.537281	0.52193	0.506579
	AMEVOR ERIC	Male	5	80	0.350877	4	80	0.444444	0.435088	0.425731	0.416374	0.407018	0.397661
	AMOAH CHARLOTTE KORKOR	Female	4	10	0.0350877	3	10	0.0416667	0.0410088	0.0403509	0.039693	0.0390351	0.0383772
177	ACHEAMPONG CHRISTABEL	Female
	AMOAH MILDRED	Female	4	5	0.0175439	3	5	0.0208333	0.0205044	0.0201754	0.0198465	0.0195175	0.0191886
	AMOAKO ERNESTINA OPOKUA	Female	2	10	0.0175439	1	10	0.0138889	0.0142544	0.0146199	0.0149854	0.0153509	0.0157164
	AMPONSAH CECILIA ABENA	Female	1	15	0.0131579	1	15	0.0208333	0.0200658	0.0192982	0.0185307	0.0177632	0.0169956
178	ACHEAMPONG KINGSLEY	Male
	AMUZU STELLA KABUKI	Female	5	20	0.0877193	4	20	0.111111	0.108772	0.106433	0.104094	0.101754	0.0994152
	ANABI MUSAH AHMED	Male	6	25	0.131579	5	25	0.173611	0.169408	0.165205	0.161001	0.156798	0.152595
	ANDERSON GIFTY	Female	2	30	0.0526316	1	30	0.0416667	0.0427632	0.0438596	0.0449561	0.0460526	0.0471491
179	ACHEAMPONG MICHAEL APPIAH	Male
	ANDERSON VIVIAN	Female	3	35	0.0921053	2	35	0.0972222	0.0967105	0.0961988	0.0956871	0.0951754	0.0946637
	ANKOMAH GEORGINA	Female	3	40	0.105263	2	40	0.111111	0.110526	0.109942	0.109357	0.108772	0.108187
	ANNANG FRANCISCA TORSHIE	Female	2	45	0.0789474	1	45	0.0625	0.0641447	0.0657895	0.0674342	0.0690789	0.0707237
180	ACQUAH BENJAMIN	Male
	ANNOR RICHAEL	Female	2	50	0.0877193	1	50	0.0694444	0.0712719	0.0730994	0.0749269	0.0767544	0.0785819
	ANSAH FAUSTINA	Female	3	55	0.144737	2	55	0.152778	0.151974	0.15117	0.150365	0.149561	0.148757
	ANSAH MARFO DOREEN	Female	2	60	0.105263	1	60	0.0833333	0.0855263	0.0877193	0.0899123	0.0921053	0.0942982
181	ACQUAH KINGSLEY OCANSEY	Male
	ANTHONIO HENRIETTA	Female	3	65	0.171053	2	65	0.180556	0.179605	0.178655	0.177705	0.176754	0.175804
	APPIAH ISAAC	Male	2	70	0.122807	1	70	0.0972222	0.0997807	0.102339	0.104898	0.107456	0.110015
	APPIAH MOSES	Male	6	5	0.0263158	5	5	0.0347222	0.0338816	0.0330409	0.0322003	0.0313596	0.030519
182	ACQUAH PHILIP	Male
	APPIAH PRINCE KWESI	Male	2	20	0.0350877	3	10	0.0416667	0.0410088	0.0403509	0.039693	0.0390351	0.0383772
	ARKO HAGAR	Female	3	25	0.0657895	4	20	0.111111	0.106579	0.102047	0.0975146	0.0929825	0.0884503
	ARKOH GALAHAD AHINSAH	Female	2	20	0.0350877	3	20	0.0833333	0.0785088	0.0736842	0.0688596	0.0640351	0.0592105
183	ADAM HALIMATU SADIA	Female
	ARTHUR EBENEZER	Male	6	25	0.131579	4	25	0.138889	0.138158	0.137427	0.136696	0.135965	0.135234
	ARTHUR ESSUMAN JAMES	Male	6	30	0.157895	4	30	0.166667	0.165789	0.164912	0.164035	0.163158	0.162281
	ARYEETEY MESHACK	Male	4	35	0.122807	3	35	0.145833	0.143531	0.141228	0.138925	0.136623	0.13432
184	ADAMA-TETTEY MARYNSKY	Female
	ASABIRE SOPHIA	Female	4	30	0.105263	3	10	0.0416667	0.0480263	0.054386	0.0607456	0.0671053	0.0734649
	ASAHENE EMMANUELLA	Female	4	25	0.0877193	3	15	0.0625	0.0650219	0.0675439	0.0700658	0.0725877	0.0751096
	ASAMANY CARL	Male	6	15	0.0789474	4	20	0.111111	0.107895	0.104678	0.101462	0.0982456	0.0950292
185	ADAMS AFISHETU	Female
	ASAMOAH MERCY	Female	5	24	0.105263	4	10	0.0555556	0.0605263	0.0654971	0.0704678	0.0754386	0.0804094
	ASARE ERIC AGYIRI AWERE	Male	5	27	0.118421	4	20	0.111111	0.111842	0.112573	0.113304	0.114035	0.114766
	ASHITEY MCZILL HAFIZ OKO	Male	2	30	0.0526316	3	30	0.125	0.117763	0.110526	0.103289	0.0960526	0.0888158
186	ADAMS ANASS	Male
	ASIEDU MAVIS	Female	1	10	0.00877193	2	10	0.0277778	0.0258772	0.0239766	0.022076	0.0201754	0.0182749
	ATIEMO JOSEPHINE	Female	1	60	0.0526316	2	60	0.166667	0.155263	0.14386	0.132456	0.121053	0.109649
	AWUDER WILLIAM YAO	Male	2	65	0.114035	3	65	0.270833	0.255154	0.239474	0.223794	0.208114	0.192434
187	ADARKWAH IRENE	Female
	AYER PERCY OKAI	Male	1	30	0.0263158	2	30	0.0833333	0.0776316	0.0719298	0.0662281	0.0605263	0.0548246
	AYISI BENJAMIN	Male	3	35	0.0921053	4	35	0.194444	0.184211	0.173977	0.163743	0.153509	0.143275
	AZAMETSI MIRABLE	Female	2	25	0.0438596	3	25	0.104167	0.098136	0.0921053	0.0860746	0.0800439	0.0740132
188	ADDAE PORTIA	Female
	BEDIAKO PRISCILLA ODURO	Female	4	10	0.0350877	5	10	0.0694444	0.0660088	0.0625731	0.0591374	0.0557018	0.0522661
	BELLEY BETTY	Female	1	30	0.0263158	2	30	0.0833333	0.0776316	0.0719298	0.0662281	0.0605263	0.0548246
	BOATEMAA SLYVIA	Female	2	45	0.0789474	3	45	0.1875	0.176645	0.165789	0.154934	0.144079	0.133224
189	ADDEY AUGUSTINE	Male
	BOATENG ABRAHAM AMEGAVIE	Male	2	35	0.0614035	3	35	0.145833	0.13739	0.128947	0.120504	0.112061	0.103618
	BONDZIE SAMUEL AIDOO	Male	3	65	0.171053	4	65	0.361111	0.342105	0.323099	0.304094	0.285088	0.266082
	BONI MAXWELL EDEM	Male	4	50	0.175439	5	50	0.347222	0.330044	0.312865	0.295687	0.278509	0.26133
190	ADDICO FRANCIS AWULEY	Male
	BOTCHWAY HANNAH	Female	2	30	0.0526316	3	30	0.125	0.117763	0.110526	0.103289	0.0960526	0.0888158
	BOTCHWAY JEMIMA ATSWEI	Female	3	20	0.0526316	4	20	0.111111	0.105263	0.0994152	0.0935673	0.0877193	0.0818713
	BOTCHWAY MICHAEL	Male	2	10	0.0175439	3	10	0.0416667	0.0392544	0.0368421	0.0344298	0.0320175	0.0296053
191	ADDISON EMMANUEL	Male
	BOYETEY SOLOMON BUERNOR	Male	2	15	0.0263158	3	15	0.0625	0.0588816	0.0552632	0.0516447	0.0480263	0.0444079
	BRENYAH SYLVESTER	Male	6	40	0.210526	7	40	0.388889	0.371053	0.353216	0.33538	0.317544	0.299708
	CLELAND VERA VASTU	Female	2	20	0.0350877	2	20	0.0555556	0.0535088	0.051462	0.0494152	0.0473684	0.0453216
192	ADDISON STEPHEN EBO	Male
	DADZIE ISAAC	Male	1	40	0.0350877	1	40	0.0555556	0.0535088	0.051462	0.0494152	0.0473684	0.0453216
	DAMALIE DEBORAH YAYRA	Female	1	50	0.0438596	1	50	0.0694444	0.066886	0.0643275	0.061769	0.0592105	0.056652
	DARKO MOSES	Male	6	25	0.131579	6	25	0.208333	0.200658	0.192982	0.185307	0.177632	0.169956
193	ADDO NAOMI	Female
	DARKOA DORA	Female	2	40	0.0701754	2	40	0.111111	0.107018	0.102924	0.0988304	0.0947368	0.0906433
	DENTAAH AMPOFO PATIENCE O.	Female	2	20	0.0350877	2	20	0.0555556	0.0535088	0.051462	0.0494152	0.0473684	0.0453216
	DJIDONU DANIEL KWESI	Male	2	30	0.0526316	2	30	0.0833333	0.0802632	0.077193	0.0741228	0.0710526	0.0679825
194	ADDO PATIENCE	Female
	DOE KENNEDY	Male	1	10	0.00877193	1	10	0.0138889	0.0133772	0.0128655	0.0123538	0.0118421	0.0113304
	DOKU ESTHER MAKU	Female	2	20	0.0350877	2	20	0.0555556	0.0535088	0.051462	0.0494152	0.0473684	0.0453216
	DOWUONA PRISCILLA NORKAI	Female	2	30	0.0526316	2	30	0.0833333	0.0802632	0.077193	0.0741228	0.0710526	0.0679825
195	ADDY MELIORA GENEVIEVE	Female
	DZRAMADO SANDRA	Female	2	40	0.0701754	2	40	0.111111	0.107018	0.102924	0.0988304	0.0947368	0.0906433
	DZUFLE BRIDGET	Female	5	50	0.219298	5	50	0.347222	0.33443	0.321637	0.308845	0.296053	0.28326
	EDZEOU BERNARD	Male	6	60	0.315789	6	60	0.5	0.481579	0.463158	0.444737	0.426316	0.407895
196	ADEKPUITOR PETER	Male
	ENTSIEH EVANS	Male	6	70	0.368421	6	70	0.583333	0.561842	0.540351	0.51886	0.497368	0.475877
	FOMETU GLADYS COURINE	Female	3	80	0.210526	3	80	0.333333	0.321053	0.308772	0.296491	0.284211	0.27193
	GANYO REBECCA EYRAM	Female	2	10	0.0175439	2	10	0.0277778	0.0267544	0.025731	0.0247076	0.0236842	0.0226608
197	ADEKU CALEB KOJO	Male
	GBADGO CHARLOTTE	Female	2	5	0.00877193	2	5	0.0138889	0.0133772	0.0128655	0.0123538	0.0118421	0.0113304
	GODOMEY ABRAHAM	Male	2	10	0.0175439	2	10	0.0277778	0.0267544	0.025731	0.0247076	0.0236842	0.0226608
	GYAN FELICIA	Female	2	15	0.0263158	2	15	0.0416667	0.0401316	0.0385965	0.0370614	0.0355263	0.0339912
198	ADETI CLIFFORD KWABLA	Male
	GYAN MANTEY	Male	2	20	0.0350877	2	20	0.0555556	0.0535088	0.051462	0.0494152	0.0473684	0.0453216
	GYEKYE EMMANUEL	Male	3	25	0.0657895	3	25	0.104167	0.100329	0.0964912	0.0926535	0.0888158	0.0849781
	HAGAN EDWIN EBOH	Male	2	30	0.0526316	2	30	0.0833333	0.0802632	0.077193	0.0741228	0.0710526	0.0679825
199	ADINKRAH ABIGAIL	Female
	HAMMOND NATHANIEL	Male	5	35	0.153509	5	35	0.243056	0.234101	0.225146	0.216192	0.207237	0.198282
	IBRAHIM MOHAMMED SANUSI	Male	3	40	0.105263	3	40	0.166667	0.160526	0.154386	0.148246	0.142105	0.135965
	IBRAHIM SEMIRATU	Female	5	45	0.197368	5	45	0.3125	0.300987	0.289474	0.277961	0.266447	0.254934
200	ADIOK JOSHUA ALLEN	Male
	INUSAH MOHAMMED	Male	3	50	0.131579	3	50	0.208333	0.200658	0.192982	0.185307	0.177632	0.169956
	KABAH ALIAYIRE ALEX	Male	4	55	0.192982	4	55	0.305556	0.294298	0.283041	0.271784	0.260526	0.249269
	KELVIN NKANSAH	Male	3	60	0.157895	3	60	0.25	0.240789	0.231579	0.222368	0.213158	0.203947
201	ADJAKLOE FLOSSIE DZIFA	Female
	KUDJUH BRIGHT DOSU	Male	2	65	0.114035	2	65	0.180556	0.173904	0.167251	0.160599	0.153947	0.147295
	KUMI DANIEL DARKO	Male	1	70	0.0614035	1	70	0.0972222	0.0936404	0.0900585	0.0864766	0.0828947	0.0793129
	KUMI MARY POKUAA	Female	2	5	0.00877193	2	5	0.0138889	0.0133772	0.0128655	0.0123538	0.0118421	0.0113304
202	ADJASOO LINDA SELINAM	Female
	KUSI LYDIA ADJOA ADJEIWAA	Female	4	10	0.0350877	4	10	0.0555556	0.0535088	0.051462	0.0494152	0.0473684	0.0453216
	KWARTENG JESSE SARPONG	Male	5	20	0.0877193	5	20	0.138889	0.133772	0.128655	0.123538	0.118421	0.113304
	LANTEI- LAMPTEY JESSE NII	Male	2	20	0.0350877	2	20	0.0555556	0.0535088	0.051462	0.0494152	0.0473684	0.0453216
203	ADJEI - BAAH STEPHEN	Male
	MASOPEH FELICIA VANILLA NAA AMELEY	Female	4	25	0.0877193	4	25	0.138889	0.133772	0.128655	0.123538	0.118421	0.113304
	MENDS FIDELIA APPIAH	Female	3	30	0.0789474	3	30	0.125	0.120395	0.115789	0.111184	0.106579	0.101974
	MENSAH BETTY TELUS	Female	2	35	0.0614035	2	35	0.0972222	0.0936404	0.0900585	0.0864766	0.0828947	0.0793129
204	ADJEI BELINDA ADJETEY	Female
	MENSAH CHARLES GYAMFI	Male	2	5	0.00877193	2	10	0.0277778	0.0258772	0.0239766	0.022076	0.0201754	0.0182749
	MENSAH PHILOMINA TECHIE	Female	3	20	0.0526316	3	15	0.0625	0.0615132	0.0605263	0.0595395	0.0585526	0.0575658
	MENYE GODWIN JR	Male	3	15	0.0394737	3	20	0.0833333	0.0789474	0.0745614	0.0701754	0.0657895	0.0614035
205	ADJEI DANIEL	Male
	MOHAMMED ADAM ZAKIYU	Male	3	25	0.0657895	3	24	0.1	0.0965789	0.0931579	0.0897368	0.0863158	0.0828947
	NARTEH GEOFFREY	Male	2	30	0.0526316	2	27	0.075	0.0727632	0.0705263	0.0682895	0.0660526	0.0638158
	NKANSAH LOCTUS ADJEI	Female	1	25	0.0219298	1	30	0.0416667	0.039693	0.0377193	0.0357456	0.0337719	0.0317982
206	ADJEI HENRY	Male
	NORTEY NICHOLAS	Male	5	10	0.0438596	5	10	0.0694444	0.066886	0.0643275	0.061769	0.0592105	0.056652
	NUAMAH SAMUEL	Male	2	60	0.105263	2	60	0.166667	0.160526	0.154386	0.148246	0.142105	0.135965
	NUKPE DAVID CONVERY	Male	7	65	0.399123	7	65	0.631944	0.608662	0.58538	0.562098	0.538816	0.515534
207	ADJEI JENNIFER ODUA	Female
	NYARKO ANISA	Female	2	30	0.0526316	2	30	0.0833333	0.0802632	0.077193	0.0741228	0.0710526	0.0679825
	NYARKO NICHOLAS	Male	2	35	0.0614035	2	35	0.0972222	0.0936404	0.0900585	0.0864766	0.0828947	0.0793129
	NYARKO WILLIAM KWABENA	Male	1	25	0.0219298	1	25	0.0347222	0.033443	0.0321637	0.0308845	0.0296053	0.028326
208	ADJEIBEA RACHEAL	Female
	NYEDU ISHMAEL	Male	4	10	0.0350877	4	10	0.0555556	0.0535088	0.051462	0.0494152	0.0473684	0.0453216
	OBENG JULIANA	Female	3	30	0.0789474	3	30	0.125	0.120395	0.115789	0.111184	0.106579	0.101974
	OBUOBI SOLOMON	Male	3	45	0.118421	3	45	0.1875	0.180592	0.173684	0.166776	0.159868	0.152961
209	ADJETEY ERAMI NII ADJEI	Male
	ODOI ERIC AKO	Male	5	35	0.153509	5	35	0.243056	0.234101	0.225146	0.216192	0.207237	0.198282
	OFFEI OSEI FRANCIS	Male	4	65	0.22807	4	65	0.361111	0.347807	0.334503	0.321199	0.307895	0.294591
	OPOKU SAMUEL	Male	2	50	0.0877193	2	50	0.138889	0.133772	0.128655	0.123538	0.118421	0.113304
210	ADJIN-TETTEY JEREMIAH	Male
	OPOKUA GIFTY NANA AMA	Female	2	30	0.0526316	2	30	0.0833333	0.0802632	0.077193	0.0741228	0.0710526	0.0679825
	OSEI RICHMOND KOFI	Male	3	20	0.0526316	3	20	0.0833333	0.0802632	0.077193	0.0741228	0.0710526	0.0679825
	OUEDORAOGO ROGER PETER	Male	6	10	0.0526316	6	10	0.0833333	0.0802632	0.077193	0.0741228	0.0710526	0.0679825
211	ADJOKATSE BERNICE	Female
	OWUSU ALEX	Male	4	15	0.0526316	4	15	0.0833333	0.0802632	0.077193	0.0741228	0.0710526	0.0679825
	OWUSU-APENTENG STEPHEN	Male	3	40	0.105263	3	40	0.166667	0.160526	0.154386	0.148246	0.142105	0.135965
	PARRY JESSICA	Male	2	20	0.0350877	2	20	0.0555556	0.0535088	0.051462	0.0494152	0.0473684	0.0453216
212	ADOM JENNIFER ESTHER OHENEBA	Female
	QUAICOE ENOCH	Male	2	40	0.0701754	2	40	0.111111	0.107018	0.102924	0.0988304	0.0947368	0.0906433
	QUANSAH BELINDA	Female	3	50	0.131579	3	50	0.208333	0.200658	0.192982	0.185307	0.177632	0.169956
	QUARTEY EVELYN NAA KWARLEY	Female	7	25	0.153509	7	25	0.243056	0.234101	0.225146	0.216192	0.207237	0.198282
213	ADOM KWADWO BOAKYE	Male
	QUARTEY SALOMEY	Female	2	40	0.0701754	2	40	0.111111	0.107018	0.102924	0.0988304	0.0947368	0.0906433
	SAHEED AZEEZAT	Female	2	20	0.0350877	2	20	0.0555556	0.0535088	0.051462	0.0494152	0.0473684	0.0453216
	SHAIBU FAUZIYATU	Female	2	30	0.0526316	2	30	0.0833333	0.0802632	0.077193	0.0741228	0.0710526	0.0679825
214	ADU BONA SUSANNA	Female
	SOWAH ALEXANDRA ENYONAM	Female	4	10	0.0350877	4	10	0.0555556	0.0535088	0.051462	0.0494152	0.0473684	0.0453216
	SULLEY HINDU MUNIRU	Female	3	20	0.0526316	3	20	0.0833333	0.0802632	0.077193	0.0741228	0.0710526	0.0679825
	TAGOE DAVID	Male	4	30	0.105263	4	30	0.166667	0.160526	0.154386	0.148246	0.142105	0.135965
215	ADU DORA	Female
	TAWIAH ADAMA OKOE	Male	2	40	0.0701754	2	40	0.111111	0.107018	0.102924	0.0988304	0.0947368	0.0906433
	TETTEH KELVIN	Male	3	50	0.131579	3	50	0.208333	0.200658	0.192982	0.185307	0.177632	0.169956
	TETTEH MALVIN	Male	4	60	0.210526	4	60	0.333333	0.321053	0.308772	0.296491	0.284211	0.27193
216	ADU PRISCILLA NKETIA	Female
	WADIE LINDA NKANSAH	Female	5	70	0.307018	5	70	0.486111	0.468202	0.450292	0.432383	0.414474	0.396564
	WENOMA LINDA	Female	3	80	0.210526	3	80	0.333333	0.321053	0.308772	0.296491	0.284211	0.27193
	YARTEY SEFIATU	Female	2	10	0.0175439	2	10	0.0277778	0.0267544	0.025731	0.0247076	0.0236842	0.0226608
217	ADU-AGYEI AWURA AKUA	Female
	OWUSU ALEX	Male	2	5	0.00877193	2	5	0.0138889	0.0133772	0.0128655	0.0123538	0.0118421	0.0113304
	OWUSU-APENTENG STEPHEN	Male	2	10	0.0175439	2	10	0.0277778	0.0267544	0.025731	0.0247076	0.0236842	0.0226608
	PARRY JESSICA	Male	3	15	0.0394737	3	15	0.0625	0.0601974	0.0578947	0.0555921	0.0532895	0.0509868
218	ADU-TWUM FREDERICK ASANTE	Male
	QUAICOE ENOCH	Male	2	20	0.0350877	2	20	0.0555556	0.0535088	0.051462	0.0494152	0.0473684	0.0453216
	QUANSAH BELINDA	Female	2	25	0.0438596	2	25	0.0694444	0.066886	0.0643275	0.061769	0.0592105	0.056652
	QUARTEY EVELYN NAA KWARLEY	Female	3	30	0.0789474	3	30	0.125	0.120395	0.115789	0.111184	0.106579	0.101974
219	ADUSEI GIFTY YEBOAH	Female
	QUARTEY SALOMEY	Female	2	35	0.0614035	2	35	0.0972222	0.0936404	0.0900585	0.0864766	0.0828947	0.0793129
	SAHEED AZEEZAT	Female	3	40	0.105263	3	40	0.166667	0.160526	0.154386	0.148246	0.142105	0.135965
	SHAIBU FAUZIYATU	Female	2	45	0.0789474	2	45	0.125	0.120395	0.115789	0.111184	0.106579	0.101974
220	ADUUM REBECCA	Female
	AFARI STEPHEN	Male	2	50	0.0877193	2	50	0.138889	0.133772	0.128655	0.123538	0.118421	0.113304
	AFOTEY PATRICK DUNYO	Male	3	55	0.144737	3	55	0.229167	0.220724	0.212281	0.203838	0.195395	0.186952
	AFRAH TRACY NTOW	Female	2	60	0.105263	2	60	0.166667	0.160526	0.154386	0.148246	0.142105	0.135965
221	ABABIO ABEDNEGO A.	Male
	ABOAGYE ELIZABETH BOADIWAA	Female	7	10	0.0614035	6	10	0.0833333	0.0811404	0.0789474	0.0767544	0.0745614	0.0723684
	ABOE ANDREWS	Male	5	60	0.263158	4	60	0.333333	0.326316	0.319298	0.312281	0.305263	0.298246
	ABRAHAM-QUANSAH MARY EVA	Female	4	65	0.22807	3	65	0.270833	0.266557	0.262281	0.258004	0.253728	0.249452
222	ABALEM JENNIFER	Female
	ADDAE SANDRA	Female	4	30	0.105263	1	30	0.0416667	0.0480263	0.054386	0.0607456	0.0671053	0.0734649
	ADJEI FREDERICK YAW	Male	5	35	0.153509	2	35	0.0972222	0.102851	0.10848	0.114108	0.119737	0.125365
	ADJEI PRINCE BAFFOUR	Male	6	25	0.131579	1	25	0.0347222	0.0444079	0.0540936	0.0637792	0.0734649	0.0831506
223	ABBAN VIDA OWUSU	Female
	ADJEI SAMUEL	Male	7	50	0.307018	2	10	0.0277778	0.0557018	0.0836257	0.11155	0.139474	0.167398
	ADJORLOLO MERCY NORKPLIM	Female	4	30	0.105263	3	30	0.125	0.123026	0.121053	0.119079	0.117105	0.115132
	ADOCTOR VICTORIA	Female	5	45	0.197368	4	45	0.25	0.244737	0.239474	0.234211	0.228947	0.223684
224	ADU AFRIYIE	Male
	ADU EMMANUEL	Male	7	35	0.214912	6	35	0.291667	0.283991	0.276316	0.26864	0.260965	0.253289
	ADZOWU MILLICENT	Female	1	5	0.00438596	2	65	0.180556	0.162939	0.145322	0.127705	0.110088	0.0924708
	AFORDE JAMES ABLORDE	Male	2	50	0.0877193	2	50	0.138889	0.133772	0.128655	0.123538	0.118421	0.113304
225	ABDALLAH FATIMATU	Female
	AGBENYEGA STEPHEN	Male	4	30	0.105263	3	30	0.125	0.123026	0.121053	0.119079	0.117105	0.115132
	AGBOGBA LANDRY KWAME	Male	5	20	0.0877193	4	20	0.111111	0.108772	0.106433	0.104094	0.101754	0.0994152
	AGGERH BARNABAS KOBBY	Male	6	10	0.0526316	5	10	0.0694444	0.0677632	0.0660819	0.0644006	0.0627193	0.061038
226	ABDULAI FAIZA	Female
	AGOE JEHOSHAPHAT SOWAH	Male	2	15	0.0263158	1	15	0.0208333	0.0213816	0.0219298	0.0224781	0.0230263	0.0235746
	AGUDA NARKIE PATRICIA	Female	3	40	0.105263	2	40	0.111111	0.110526	0.109942	0.109357	0.108772	0.108187
	AGYARE PRISCILLA DARFOUR	Female	2	20	0.0350877	1	20	0.0277778	0.0285088	0.0292398	0.0299708	0.0307018	0.0314327
227	ABEKAH EMMANUEL	Male
	AGYEI RICHARD KWAME	Male	4	40	0.140351	1	40	0.0555556	0.0640351	0.0725146	0.0809942	0.0894737	0.0979532
	AGYEMAN DUAH BOATEMAA	Female	4	50	0.175439	2	50	0.138889	0.142544	0.146199	0.149854	0.153509	0.157164
	AGYEMAN PAUL BOAKYE	Male	3	25	0.0657895	1	25	0.0347222	0.0378289	0.0409357	0.0440424	0.0471491	0.0502558
228	ABOAGYE DAVID ADU	Male
	AGYIRI GEORGINA	Female	3	40	0.105263	1	40	0.0555556	0.0605263	0.0654971	0.0704678	0.0754386	0.0804094
	AHIABLEY PORTIA	Female	4	20	0.0701754	2	20	0.0555556	0.0570175	0.0584795	0.0599415	0.0614035	0.0628655
	AHONI MAUDLIN AYONGO	Female	4	30	0.105263	2	30	0.0833333	0.0855263	0.0877193	0.0899123	0.0921053	0.0942982
229	ABOAGYE FELIX	Male
	AKAGBO REBECCA	Female	4	30	0.105263	1	10	0.0138889	0.0230263	0.0321637	0.0413012	0.0504386	0.059576
	AKOTO REINDOLF APPIAH	Male	2	20	0.0350877	4	20	0.111111	0.103509	0.0959064	0.0883041	0.0807018	0.0730994
	AKUFFO GIDEON	Male	1	30	0.0263158	1	30	0.0416667	0.0401316	0.0385965	0.0370614	0.0355263	0.0339912
230	ABU ABDUL MANAF	Male
	ALAGBO EMMANUEL	Male	3	40	0.105263	2	40	0.111111	0.110526	0.109942	0.109357	0.108772	0.108187
	ALLOTEY KPAKPO VINCENT	Male	2	50	0.0877193	1	50	0.0694444	0.0712719	0.0730994	0.0749269	0.0767544	0.0785819
	ALLOTEY PEARL NAA AKU	Female	2	60	0.105263	1	60	0.0833333	0.0855263	0.0877193	0.0899123	0.0921053	0.0942982
231	ABUBAKAR ARAFAT SUFYAN	Male
	AMAKYE JAMES SARPONG	Male	7	70	0.429825	6	70	0.583333	0.567982	0.552632	0.537281	0.52193	0.506579
	AMEVOR ERIC	Male	5	80	0.350877	4	80	0.444444	0.435088	0.425731	0.416374	0.407018	0.397661
	AMOAH CHARLOTTE KORKOR	Female	4	10	0.0350877	3	10	0.0416667	0.0410088	0.0403509	0.039693	0.0390351	0.0383772
232	ACHEAMPONG CHRISTABEL	Female
	AMOAH MILDRED	Female	4	5	0.0175439	3	5	0.0208333	0.0205044	0.0201754	0.0198465	0.0195175	0.0191886
	AMOAKO ERNESTINA OPOKUA	Female	2	10	0.0175439	1	10	0.0138889	0.0142544	0.0146199	0.0149854	0.0153509	0.0157164
	AMPONSAH CECILIA ABENA	Female	1	15	0.0131579	1	15	0.0208333	0.0200658	0.0192982	0.0185307	0.0177632	0.0169956
233	ACHEAMPONG KINGSLEY	Male
	AMUZU STELLA KABUKI	Female	5	20	0.0877193	4	20	0.111111	0.108772	0.106433	0.104094	0.101754	0.0994152
	ANABI MUSAH AHMED	Male	6	25	0.131579	5	25	0.173611	0.169408	0.165205	0.161001	0.156798	0.152595
234	ANDERSON GIFTY	Female	2	30	0.0526316	1	30	0.0416667	0.0427632	0.0438596	0.0449561	0.0460526	0.0471491
	ACHEAMPONG MICHAEL APPIAH	Male
	ANDERSON VIVIAN	Female	3	35	0.0921053	2	35	0.0972222	0.0967105	0.0961988	0.0956871	0.0951754	0.0946637
	ANKOMAH GEORGINA	Female	3	40	0.105263	2	40	0.111111	0.110526	0.109942	0.109357	0.108772	0.108187
	ANNANG FRANCISCA TORSHIE	Female	2	45	0.0789474	1	45	0.0625	0.0641447	0.0657895	0.0674342	0.0690789	0.0707237
235	ACQUAH BENJAMIN	Male
	ANNOR RICHAEL	Female	2	50	0.0877193	1	50	0.0694444	0.0712719	0.0730994	0.0749269	0.0767544	0.0785819
	ANSAH FAUSTINA	Female	3	55	0.144737	2	55	0.152778	0.151974	0.15117	0.150365	0.149561	0.148757
	ANSAH MARFO DOREEN	Female	2	60	0.105263	1	60	0.0833333	0.0855263	0.0877193	0.0899123	0.0921053	0.0942982
236	ACQUAH KINGSLEY OCANSEY	Male
	ANTHONIO HENRIETTA	Female	3	65	0.171053	2	65	0.180556	0.179605	0.178655	0.177705	0.176754	0.175804
	APPIAH ISAAC	Male	2	70	0.122807	1	70	0.0972222	0.0997807	0.102339	0.104898	0.107456	0.110015
	APPIAH MOSES	Male	6	5	0.0263158	5	5	0.0347222	0.0338816	0.0330409	0.0322003	0.0313596	0.030519
237	ACQUAH PHILIP	Male
	APPIAH PRINCE KWESI	Male	2	20	0.0350877	3	10	0.0416667	0.0410088	0.0403509	0.039693	0.0390351	0.0383772
	ARKO HAGAR	Female	3	25	0.0657895	4	20	0.111111	0.106579	0.102047	0.0975146	0.0929825	0.0884503
	ARKOH GALAHAD AHINSAH	Female	2	20	0.0350877	3	20	0.0833333	0.0785088	0.0736842	0.0688596	0.0640351	0.0592105
238	ADAM HALIMATU SADIA	Female
	ARTHUR EBENEZER	Male	6	25	0.131579	4	25	0.138889	0.138158	0.137427	0.136696	0.135965	0.135234
	ARTHUR ESSUMAN JAMES	Male	6	30	0.157895	4	30	0.166667	0.165789	0.164912	0.164035	0.163158	0.162281
	ARYEETEY MESHACK	Male	4	35	0.122807	3	35	0.145833	0.143531	0.141228	0.138925	0.136623	0.13432
239	ADAMA-TETTEY MARYNSKY	Female
	ASABIRE SOPHIA	Female	4	30	0.105263	3	5	0.0208333	0.0292763	0.0377193	0.0461623	0.0546053	0.0630482
	ASAHENE EMMANUELLA	Female	4	25	0.0877193	3	10	0.0416667	0.0462719	0.0508772	0.0554825	0.0600877	0.064693
	ASAMANY CARL	Male	6	15	0.0789474	4	15	0.0833333	0.0828947	0.0824561	0.0820175	0.0815789	0.0811404
240	ADAMS AFISHETU	Female
	ASAMOAH MERCY	Female	5	20	0.0877193	4	20	0.111111	0.108772	0.106433	0.104094	0.101754	0.0994152
	ASARE ERIC AGYIRI AWERE	Male	5	10	0.0438596	4	25	0.138889	0.129386	0.119883	0.11038	0.100877	0.0913743
	ASHITEY MCZILL HAFIZ OKO	Male	2	5	0.00877193	3	30	0.125	0.113377	0.101754	0.0901316	0.0785088	0.066886
241	ADAMS ANASS	Male
	ASIEDU MAVIS	Female	1	10	0.00877193	2	10	0.0277778	0.0258772	0.0239766	0.022076	0.0201754	0.0182749
	ATIEMO JOSEPHINE	Female	1	60	0.0526316	2	60	0.166667	0.155263	0.14386	0.132456	0.121053	0.109649
	AWUDER WILLIAM YAO	Male	2	65	0.114035	3	65	0.270833	0.255154	0.239474	0.223794	0.208114	0.192434
242	ADARKWAH IRENE	Female
	AYER PERCY OKAI	Male	1	30	0.0263158	2	30	0.0833333	0.0776316	0.0719298	0.0662281	0.0605263	0.0548246
	AYISI BENJAMIN	Male	3	35	0.0921053	4	35	0.194444	0.184211	0.173977	0.163743	0.153509	0.143275
	AZAMETSI MIRABLE	Female	2	25	0.0438596	3	25	0.104167	0.098136	0.0921053	0.0860746	0.0800439	0.0740132
243	ADDAE PORTIA	Female
	BEDIAKO PRISCILLA ODURO	Female	4	10	0.0350877	5	10	0.0694444	0.0660088	0.0625731	0.0591374	0.0557018	0.0522661
	BELLEY BETTY	Female	1	30	0.0263158	2	30	0.0833333	0.0776316	0.0719298	0.0662281	0.0605263	0.0548246
	BOATEMAA SLYVIA	Female	2	45	0.0789474	3	45	0.1875	0.176645	0.165789	0.154934	0.144079	0.133224
244	ADDEY AUGUSTINE	Male
	BOATENG ABRAHAM AMEGAVIE	Male	2	35	0.0614035	3	35	0.145833	0.13739	0.128947	0.120504	0.112061	0.103618
	BONDZIE SAMUEL AIDOO	Male	3	65	0.171053	4	65	0.361111	0.342105	0.323099	0.304094	0.285088	0.266082
	BONI MAXWELL EDEM	Male	4	50	0.175439	5	50	0.347222	0.330044	0.312865	0.295687	0.278509	0.26133
245	ADDICO FRANCIS AWULEY	Male
	BOTCHWAY HANNAH	Female	2	30	0.0526316	3	30	0.125	0.117763	0.110526	0.103289	0.0960526	0.0888158
	BOTCHWAY JEMIMA ATSWEI	Female	3	20	0.0526316	4	20	0.111111	0.105263	0.0994152	0.0935673	0.0877193	0.0818713
	BOTCHWAY MICHAEL	Male	2	10	0.0175439	3	10	0.0416667	0.0392544	0.0368421	0.0344298	0.0320175	0.0296053
246	ADDISON EMMANUEL	Male
	BOYETEY SOLOMON BUERNOR	Male	2	15	0.0263158	3	15	0.0625	0.0588816	0.0552632	0.0516447	0.0480263	0.0444079
	BRENYAH SYLVESTER	Male	6	40	0.210526	7	40	0.388889	0.371053	0.353216	0.33538	0.317544	0.299708
	CLELAND VERA VASTU	Female	2	20	0.0350877	2	20	0.0555556	0.0535088	0.051462	0.0494152	0.0473684	0.0453216
247	ADDISON STEPHEN EBO	Male
	DADZIE ISAAC	Male	1	40	0.0350877	1	40	0.0555556	0.0535088	0.051462	0.0494152	0.0473684	0.0453216
	DAMALIE DEBORAH YAYRA	Female	1	50	0.0438596	1	50	0.0694444	0.066886	0.0643275	0.061769	0.0592105	0.056652
	DARKO MOSES	Male	6	25	0.131579	6	25	0.208333	0.200658	0.192982	0.185307	0.177632	0.169956
248	ADDO NAOMI	Female
	DARKOA DORA	Female	2	40	0.0701754	2	40	0.111111	0.107018	0.102924	0.0988304	0.0947368	0.0906433
	DENTAAH AMPOFO PATIENCE O.	Female	2	20	0.0350877	2	20	0.0555556	0.0535088	0.051462	0.0494152	0.0473684	0.0453216
	DJIDONU DANIEL KWESI	Male	2	30	0.0526316	2	30	0.0833333	0.0802632	0.077193	0.0741228	0.0710526	0.0679825
249	ADDO PATIENCE	Female
	DOE KENNEDY	Male	1	10	0.00877193	1	10	0.0138889	0.0133772	0.0128655	0.0123538	0.0118421	0.0113304
	DOKU ESTHER MAKU	Female	2	20	0.0350877	2	20	0.0555556	0.0535088	0.051462	0.0494152	0.0473684	0.0453216
	DOWUONA PRISCILLA NORKAI	Female	2	30	0.0526316	2	30	0.0833333	0.0802632	0.077193	0.0741228	0.0710526	0.0679825
250	ADDY MELIORA GENEVIEVE	Female
	DZRAMADO SANDRA	Female	2	40	0.0701754	2	40	0.111111	0.107018	0.102924	0.0988304	0.0947368	0.0906433
	DZUFLE BRIDGET	Female	5	50	0.219298	5	50	0.347222	0.33443	0.321637	0.308845	0.296053	0.28326
	EDZEOU BERNARD	Male	6	60	0.315789	6	60	0.5	0.481579	0.463158	0.444737	0.426316	0.407895
251	ADEKPUITOR PETER	Male
	ENTSIEH EVANS	Male	6	70	0.368421	6	70	0.583333	0.561842	0.540351	0.51886	0.497368	0.475877
	FOMETU GLADYS COURINE	Female	3	80	0.210526	3	80	0.333333	0.321053	0.308772	0.296491	0.284211	0.27193
	GANYO REBECCA EYRAM	Female	2	10	0.0175439	2	10	0.0277778	0.0267544	0.025731	0.0247076	0.0236842	0.0226608
252	ADEKU CALEB KOJO	Male
	GBADGO CHARLOTTE	Female	2	5	0.00877193	2	5	0.0138889	0.0133772	0.0128655	0.0123538	0.0118421	0.0113304
	GODOMEY ABRAHAM	Male	2	10	0.0175439	2	10	0.0277778	0.0267544	0.025731	0.0247076	0.0236842	0.0226608
	GYAN FELICIA	Female	2	15	0.0263158	2	15	0.0416667	0.0401316	0.0385965	0.0370614	0.0355263	0.0339912
253	ADETI CLIFFORD KWABLA	Male
	GYAN MANTEY	Male	2	20	0.0350877	2	20	0.0555556	0.0535088	0.051462	0.0494152	0.0473684	0.0453216
	GYEKYE EMMANUEL	Male	3	25	0.0657895	3	25	0.104167	0.100329	0.0964912	0.0926535	0.0888158	0.0849781
	HAGAN EDWIN EBOH	Male	2	30	0.0526316	2	30	0.0833333	0.0802632	0.077193	0.0741228	0.0710526	0.0679825
254	ADINKRAH ABIGAIL	Female
	HAMMOND NATHANIEL	Male	5	35	0.153509	5	35	0.243056	0.234101	0.225146	0.216192	0.207237	0.198282
	IBRAHIM MOHAMMED SANUSI	Male	3	40	0.105263	3	40	0.166667	0.160526	0.154386	0.148246	0.142105	0.135965
	IBRAHIM SEMIRATU	Female	5	45	0.197368	5	45	0.3125	0.300987	0.289474	0.277961	0.266447	0.254934
255	ADIOK JOSHUA ALLEN	Male
	INUSAH MOHAMMED	Male	3	50	0.131579	3	50	0.208333	0.200658	0.192982	0.185307	0.177632	0.169956
	KABAH ALIAYIRE ALEX	Male	4	55	0.192982	4	55	0.305556	0.294298	0.283041	0.271784	0.260526	0.249269
	KELVIN NKANSAH	Male	3	60	0.157895	3	60	0.25	0.240789	0.231579	0.222368	0.213158	0.203947
256	ADJAKLOE FLOSSIE DZIFA	Female
	KUDJUH BRIGHT DOSU	Male	2	65	0.114035	2	65	0.180556	0.173904	0.167251	0.160599	0.153947	0.147295
	KUMI DANIEL DARKO	Male	1	70	0.0614035	1	70	0.0972222	0.0936404	0.0900585	0.0864766	0.0828947	0.0793129
	KUMI MARY POKUAA	Female	2	5	0.00877193	2	5	0.0138889	0.0133772	0.0128655	0.0123538	0.0118421	0.0113304
257	ADJASOO LINDA SELINAM	Female
	KUSI LYDIA ADJOA ADJEIWAA	Female	4	10	0.0350877	4	10	0.0555556	0.0535088	0.051462	0.0494152	0.0473684	0.0453216
	KWARTENG JESSE SARPONG	Male	5	20	0.0877193	5	20	0.138889	0.133772	0.128655	0.123538	0.118421	0.113304
	LANTEI- LAMPTEY JESSE NII	Male	2	20	0.0350877	2	20	0.0555556	0.0535088	0.051462	0.0494152	0.0473684	0.0453216
258	ADJEI - BAAH STEPHEN	Male
	MASOPEH FELICIA VANILLA NAA AMELEY	Female	4	25	0.0877193	4	25	0.138889	0.133772	0.128655	0.123538	0.118421	0.113304
	MENDS FIDELIA APPIAH	Female	3	30	0.0789474	3	30	0.125	0.120395	0.115789	0.111184	0.106579	0.101974
	MENSAH BETTY TELUS	Female	2	35	0.0614035	2	35	0.0972222	0.0936404	0.0900585	0.0864766	0.0828947	0.0793129
259	ADJEI BELINDA ADJETEY	Female
	MENSAH CHARLES GYAMFI	Male	2	5	0.00877193	2	10	0.0277778	0.0258772	0.0239766	0.022076	0.0201754	0.0182749
	MENSAH PHILOMINA TECHIE	Female	3	10	0.0263158	3	15	0.0625	0.0588816	0.0552632	0.0516447	0.0480263	0.0444079
	MENYE GODWIN JR	Male	3	15	0.0394737	3	20	0.0833333	0.0789474	0.0745614	0.0701754	0.0657895	0.0614035
260	ADJEI DANIEL	Male
	MOHAMMED ADAM ZAKIYU	Male	3	20	0.0526316	3	24	0.1	0.0952632	0.0905263	0.0857895	0.0810526	0.0763158
	NARTEH GEOFFREY	Male	2	25	0.0438596	2	27	0.075	0.071886	0.0687719	0.0656579	0.0625439	0.0594298
	NKANSAH LOCTUS ADJEI	Female	1	30	0.0263158	1	30	0.0416667	0.0401316	0.0385965	0.0370614	0.0355263	0.0339912
261	ADJEI HENRY	Male
	NORTEY NICHOLAS	Male	5	10	0.0438596	5	10	0.0694444	0.066886	0.0643275	0.061769	0.0592105	0.056652
	NUAMAH SAMUEL	Male	2	60	0.105263	2	60	0.166667	0.160526	0.154386	0.148246	0.142105	0.135965
	NUKPE DAVID CONVERY	Male	7	65	0.399123	7	65	0.631944	0.608662	0.58538	0.562098	0.538816	0.515534
262	ADJEI JENNIFER ODUA	Female
	NYARKO ANISA	Female	2	30	0.0526316	2	30	0.0833333	0.0802632	0.077193	0.0741228	0.0710526	0.0679825
	NYARKO NICHOLAS	Male	2	35	0.0614035	2	35	0.0972222	0.0936404	0.0900585	0.0864766	0.0828947	0.0793129
	NYARKO WILLIAM KWABENA	Male	1	25	0.0219298	1	25	0.0347222	0.033443	0.0321637	0.0308845	0.0296053	0.028326
263	ADJEIBEA RACHEAL	Female
	NYEDU ISHMAEL	Male	4	10	0.0350877	4	10	0.0555556	0.0535088	0.051462	0.0494152	0.0473684	0.0453216
	OBENG JULIANA	Female	3	30	0.0789474	3	30	0.125	0.120395	0.115789	0.111184	0.106579	0.101974
	OBUOBI SOLOMON	Male	3	45	0.118421	3	45	0.1875	0.180592	0.173684	0.166776	0.159868	0.152961
264	ADJETEY ERAMI NII ADJEI	Male
	ODOI ERIC AKO	Male	5	35	0.153509	5	35	0.243056	0.234101	0.225146	0.216192	0.207237	0.198282
	OFFEI OSEI FRANCIS	Male	4	65	0.22807	4	65	0.361111	0.347807	0.334503	0.321199	0.307895	0.294591
	OPOKU SAMUEL	Male	2	50	0.0877193	2	50	0.138889	0.133772	0.128655	0.123538	0.118421	0.113304
265	ADJIN-TETTEY JEREMIAH	Male
	OPOKUA GIFTY NANA AMA	Female	2	30	0.0526316	2	30	0.0833333	0.0802632	0.077193	0.0741228	0.0710526	0.0679825
	OSEI RICHMOND KOFI	Male	3	20	0.0526316	3	20	0.0833333	0.0802632	0.077193	0.0741228	0.0710526	0.0679825
	OUEDORAOGO ROGER PETER	Male	6	10	0.0526316	6	10	0.0833333	0.0802632	0.077193	0.0741228	0.0710526	0.0679825
266	ADJOKATSE BERNICE	Female
	OWUSU ALEX	Male	4	15	0.0526316	4	15	0.0833333	0.0802632	0.077193	0.0741228	0.0710526	0.0679825
	OWUSU-APENTENG STEPHEN	Male	3	40	0.105263	3	40	0.166667	0.160526	0.154386	0.148246	0.142105	0.135965
	PARRY JESSICA	Male	2	20	0.0350877	2	20	0.0555556	0.0535088	0.051462	0.0494152	0.0473684	0.0453216
267	ADOM JENNIFER ESTHER OHENEBA	Female
	QUAICOE ENOCH	Male	2	40	0.0701754	2	40	0.111111	0.107018	0.102924	0.0988304	0.0947368	0.0906433
	QUANSAH BELINDA	Female	3	50	0.131579	3	50	0.208333	0.200658	0.192982	0.185307	0.177632	0.169956
	QUARTEY EVELYN NAA KWARLEY	Female	7	25	0.153509	7	25	0.243056	0.234101	0.225146	0.216192	0.207237	0.198282
268	ADOM KWADWO BOAKYE	Male
	QUARTEY SALOMEY	Female	2	40	0.0701754	2	40	0.111111	0.107018	0.102924	0.0988304	0.0947368	0.0906433
	SAHEED AZEEZAT	Female	2	20	0.0350877	2	20	0.0555556	0.0535088	0.051462	0.0494152	0.0473684	0.0453216
	SHAIBU FAUZIYATU	Female	2	30	0.0526316	2	30	0.0833333	0.0802632	0.077193	0.0741228	0.0710526	0.0679825
269	ADU BONA SUSANNA	Female
	SOWAH ALEXANDRA ENYONAM	Female	4	10	0.0350877	4	10	0.0555556	0.0535088	0.051462	0.0494152	0.0473684	0.0453216
	SULLEY HINDU MUNIRU	Female	3	20	0.0526316	3	20	0.0833333	0.0802632	0.077193	0.0741228	0.0710526	0.0679825
	TAGOE DAVID	Male	4	30	0.105263	4	30	0.166667	0.160526	0.154386	0.148246	0.142105	0.135965
270	ADU DORA	Female
	TAWIAH ADAMA OKOE	Male	2	40	0.0701754	2	40	0.111111	0.107018	0.102924	0.0988304	0.0947368	0.0906433
	TETTEH KELVIN	Male	3	50	0.131579	3	50	0.208333	0.200658	0.192982	0.185307	0.177632	0.169956
	TETTEH MALVIN	Male	4	60	0.210526	4	60	0.333333	0.321053	0.308772	0.296491	0.284211	0.27193
271	ADU PRISCILLA NKETIA	Female
	WADIE LINDA NKANSAH	Female	5	70	0.307018	5	70	0.486111	0.468202	0.450292	0.432383	0.414474	0.396564
	WENOMA LINDA	Female	3	80	0.210526	3	80	0.333333	0.321053	0.308772	0.296491	0.284211	0.27193
	YARTEY SEFIATU	Female	2	10	0.0175439	2	10	0.0277778	0.0267544	0.025731	0.0247076	0.0236842	0.0226608
272	ADU-AGYEI AWURA AKUA	Female
	OWUSU ALEX	Male	2	5	0.00877193	2	5	0.0138889	0.0133772	0.0128655	0.0123538	0.0118421	0.0113304
	OWUSU-APENTENG STEPHEN	Male	2	10	0.0175439	2	10	0.0277778	0.0267544	0.025731	0.0247076	0.0236842	0.0226608
	PARRY JESSICA	Male	3	15	0.0394737	3	15	0.0625	0.0601974	0.0578947	0.0555921	0.0532895	0.0509868
273	ADU-TWUM FREDERICK ASANTE	Male
	QUAICOE ENOCH	Male	2	20	0.0350877	2	20	0.0555556	0.0535088	0.051462	0.0494152	0.0473684	0.0453216
	QUANSAH BELINDA	Female	2	25	0.0438596	2	25	0.0694444	0.066886	0.0643275	0.061769	0.0592105	0.056652
	QUARTEY EVELYN NAA KWARLEY	Female	3	30	0.0789474	3	30	0.125	0.120395	0.115789	0.111184	0.106579	0.101974
274	ADUSEI GIFTY YEBOAH	Female
	QUARTEY SALOMEY	Female	2	35	0.0614035	2	35	0.0972222	0.0936404	0.0900585	0.0864766	0.0828947	0.0793129
	SAHEED AZEEZAT	Female	3	40	0.105263	3	40	0.166667	0.160526	0.154386	0.148246	0.142105	0.135965
	SHAIBU FAUZIYATU	Female	2	45	0.0789474	2	45	0.125	0.120395	0.115789	0.111184	0.106579	0.101974
275	ADUUM REBECCA	Female
	AFARI STEPHEN	Male	2	50	0.0877193	2	50	0.138889	0.133772	0.128655	0.123538	0.118421	0.113304
	AFOTEY PATRICK DUNYO	Male	3	55	0.144737	3	55	0.229167	0.220724	0.212281	0.203838	0.195395	0.186952
	AFRAH TRACY NTOW	Female	2	60	0.105263	2	60	0.166667	0.160526	0.154386	0.148246	0.142105	0.135965
276	ABABIO ABEDNEGO A.	Male
	ABOAGYE ELIZABETH BOADIWAA	Female	7	10	0.0614035	6	10	0.0833333	0.0811404	0.0789474	0.0767544	0.0745614	0.0723684
	ABOE ANDREWS	Male	5	60	0.263158	4	60	0.333333	0.326316	0.319298	0.312281	0.305263	0.298246
	ABRAHAM-QUANSAH MARY EVA	Female	4	65	0.22807	3	65	0.270833	0.266557	0.262281	0.258004	0.253728	0.249452
277	ABALEM JENNIFER	Female
	ADDAE SANDRA	Female	4	30	0.105263	1	30	0.0416667	0.0480263	0.054386	0.0607456	0.0671053	0.0734649
	ADJEI FREDERICK YAW	Male	5	35	0.153509	2	35	0.0972222	0.102851	0.10848	0.114108	0.119737	0.125365
	ADJEI PRINCE BAFFOUR	Male	6	25	0.131579	1	25	0.0347222	0.0444079	0.0540936	0.0637792	0.0734649	0.0831506
278	ABBAN VIDA OWUSU	Female
	ADJEI SAMUEL	Male	7	50	0.307018	2	10	0.0277778	0.0557018	0.0836257	0.11155	0.139474	0.167398
	ADJORLOLO MERCY NORKPLIM	Female	4	30	0.105263	3	30	0.125	0.123026	0.121053	0.119079	0.117105	0.115132
	ADOCTOR VICTORIA	Female	5	45	0.197368	4	45	0.25	0.244737	0.239474	0.234211	0.228947	0.223684
279	ADU AFRIYIE	Male
	ADU EMMANUEL	Male	7	35	0.214912	6	35	0.291667	0.283991	0.276316	0.26864	0.260965	0.253289
	ADZOWU MILLICENT	Female	1	4	0.00350877	2	65	0.180556	0.162851	0.145146	0.127442	0.109737	0.0920322
	AFORDE JAMES ABLORDE	Male	2	50	0.0877193	2	50	0.138889	0.133772	0.128655	0.123538	0.118421	0.113304
280	ABDALLAH FATIMATU	Female
	AGBENYEGA STEPHEN	Male	4	30	0.105263	3	30	0.125	0.123026	0.121053	0.119079	0.117105	0.115132
	AGBOGBA LANDRY KWAME	Male	5	20	0.0877193	4	20	0.111111	0.108772	0.106433	0.104094	0.101754	0.0994152
	AGGERH BARNABAS KOBBY	Male	6	10	0.0526316	5	10	0.0694444	0.0677632	0.0660819	0.0644006	0.0627193	0.061038
281	ABDULAI FAIZA	Female
	AGOE JEHOSHAPHAT SOWAH	Male	2	15	0.0263158	1	15	0.0208333	0.0213816	0.0219298	0.0224781	0.0230263	0.0235746
	AGUDA NARKIE PATRICIA	Female	3	40	0.105263	2	40	0.111111	0.110526	0.109942	0.109357	0.108772	0.108187
	AGYARE PRISCILLA DARFOUR	Female	2	20	0.0350877	1	20	0.0277778	0.0285088	0.0292398	0.0299708	0.0307018	0.0314327
282	ABEKAH EMMANUEL	Male
	AGYEI RICHARD KWAME	Male	4	40	0.140351	1	40	0.0555556	0.0640351	0.0725146	0.0809942	0.0894737	0.0979532
	AGYEMAN DUAH BOATEMAA	Female	4	50	0.175439	2	50	0.138889	0.142544	0.146199	0.149854	0.153509	0.157164
	AGYEMAN PAUL BOAKYE	Male	3	25	0.0657895	1	25	0.0347222	0.0378289	0.0409357	0.0440424	0.0471491	0.0502558
283	ABOAGYE DAVID ADU	Male
	AGYIRI GEORGINA	Female	3	40	0.105263	1	40	0.0555556	0.0605263	0.0654971	0.0704678	0.0754386	0.0804094
	AHIABLEY PORTIA	Female	4	20	0.0701754	2	20	0.0555556	0.0570175	0.0584795	0.0599415	0.0614035	0.0628655
	AHONI MAUDLIN AYONGO	Female	4	30	0.105263	2	30	0.0833333	0.0855263	0.0877193	0.0899123	0.0921053	0.0942982
284	ABOAGYE FELIX	Male
	AKAGBO REBECCA	Female	4	30	0.105263	1	10	0.0138889	0.0230263	0.0321637	0.0413012	0.0504386	0.059576
	AKOTO REINDOLF APPIAH	Male	2	20	0.0350877	4	20	0.111111	0.103509	0.0959064	0.0883041	0.0807018	0.0730994
	AKUFFO GIDEON	Male	1	30	0.0263158	1	30	0.0416667	0.0401316	0.0385965	0.0370614	0.0355263	0.0339912
285	ABU ABDUL MANAF	Male
	ALAGBO EMMANUEL	Male	3	40	0.105263	2	40	0.111111	0.110526	0.109942	0.109357	0.108772	0.108187
	ALLOTEY KPAKPO VINCENT	Male	2	50	0.0877193	1	50	0.0694444	0.0712719	0.0730994	0.0749269	0.0767544	0.0785819
	ALLOTEY PEARL NAA AKU	Female	2	60	0.105263	1	60	0.0833333	0.0855263	0.0877193	0.0899123	0.0921053	0.0942982
286	ABUBAKAR ARAFAT SUFYAN	Male
	AMAKYE JAMES SARPONG	Male	7	70	0.429825	6	70	0.583333	0.567982	0.552632	0.537281	0.52193	0.506579
	AMEVOR ERIC	Male	5	80	0.350877	4	80	0.444444	0.435088	0.425731	0.416374	0.407018	0.397661
	AMOAH CHARLOTTE KORKOR	Female	4	10	0.0350877	3	10	0.0416667	0.0410088	0.0403509	0.039693	0.0390351	0.0383772
287	ACHEAMPONG CHRISTABEL	Female
	AMOAH MILDRED	Female	4	5	0.0175439	3	5	0.0208333	0.0205044	0.0201754	0.0198465	0.0195175	0.0191886
	AMOAKO ERNESTINA OPOKUA	Female	2	10	0.0175439	1	10	0.0138889	0.0142544	0.0146199	0.0149854	0.0153509	0.0157164
	AMPONSAH CECILIA ABENA	Female	1	15	0.0131579	1	15	0.0208333	0.0200658	0.0192982	0.0185307	0.0177632	0.0169956
288	ACHEAMPONG KINGSLEY	Male
	AMUZU STELLA KABUKI	Female	5	20	0.0877193	4	20	0.111111	0.108772	0.106433	0.104094	0.101754	0.0994152
	ANABI MUSAH AHMED	Male	6	25	0.131579	5	25	0.173611	0.169408	0.165205	0.161001	0.156798	0.152595
	ANDERSON GIFTY	Female	2	30	0.0526316	1	30	0.0416667	0.0427632	0.0438596	0.0449561	0.0460526	0.0471491
289	ACHEAMPONG MICHAEL APPIAH	Male
	ANDERSON VIVIAN	Female	3	35	0.0921053	2	35	0.0972222	0.0967105	0.0961988	0.0956871	0.0951754	0.0946637
	ANKOMAH GEORGINA	Female	3	40	0.105263	2	40	0.111111	0.110526	0.109942	0.109357	0.108772	0.108187
	ANNANG FRANCISCA TORSHIE	Female	2	45	0.0789474	1	45	0.0625	0.0641447	0.0657895	0.0674342	0.0690789	0.0707237
290	ACQUAH BENJAMIN	Male
	ANNOR RICHAEL	Female	2	50	0.0877193	1	50	0.0694444	0.0712719	0.0730994	0.0749269	0.0767544	0.0785819
	ANSAH FAUSTINA	Female	3	55	0.144737	2	55	0.152778	0.151974	0.15117	0.150365	0.149561	0.148757
	ANSAH MARFO DOREEN	Female	2	60	0.105263	1	60	0.0833333	0.0855263	0.0877193	0.0899123	0.0921053	0.0942982
291	ACQUAH KINGSLEY OCANSEY	Male
	ANTHONIO HENRIETTA	Female	3	65	0.171053	2	65	0.180556	0.179605	0.178655	0.177705	0.176754	0.175804
	APPIAH ISAAC	Male	2	70	0.122807	1	70	0.0972222	0.0997807	0.102339	0.104898	0.107456	0.110015
	APPIAH MOSES	Male	6	5	0.0263158	5	5	0.0347222	0.0338816	0.0330409	0.0322003	0.0313596	0.030519
292	ACQUAH PHILIP	Male
	APPIAH PRINCE KWESI	Male	2	20	0.0350877	3	10	0.0416667	0.0410088	0.0403509	0.039693	0.0390351	0.0383772
	ARKO HAGAR	Female	3	25	0.0657895	4	20	0.111111	0.106579	0.102047	0.0975146	0.0929825	0.0884503
	ARKOH GALAHAD AHINSAH	Female	2	20	0.0350877	3	20	0.0833333	0.0785088	0.0736842	0.0688596	0.0640351	0.0592105
293	ADAM HALIMATU SADIA	Female
	ARTHUR EBENEZER	Male	6	25	0.131579	4	25	0.138889	0.138158	0.137427	0.136696	0.135965	0.135234
	ARTHUR ESSUMAN JAMES	Male	6	30	0.157895	4	30	0.166667	0.165789	0.164912	0.164035	0.163158	0.162281
	ARYEETEY MESHACK	Male	4	35	0.122807	3	35	0.145833	0.143531	0.141228	0.138925	0.136623	0.13432
294	ADAMA-TETTEY MARYNSKY	Female
	ASABIRE SOPHIA	Female	4	30	0.105263	3	5	0.0208333	0.0292763	0.0377193	0.0461623	0.0546053	0.0630482
	ASAHENE EMMANUELLA	Female	4	25	0.0877193	3	10	0.0416667	0.0462719	0.0508772	0.0554825	0.0600877	0.064693
	ASAMANY CARL	Male	6	15	0.0789474	4	15	0.0833333	0.0828947	0.0824561	0.0820175	0.0815789	0.0811404
295	ADAMS AFISHETU	Female
	ASAMOAH MERCY	Female	5	20	0.0877193	4	20	0.111111	0.108772	0.106433	0.104094	0.101754	0.0994152
	ASARE ERIC AGYIRI AWERE	Male	5	25	0.109649	4	25	0.138889	0.135965	0.133041	0.130117	0.127193	0.124269
	ASHITEY MCZILL HAFIZ OKO	Male	2	30	0.0526316	3	30	0.125	0.117763	0.110526	0.103289	0.0960526	0.0888158
296	ADAMS ANASS	Male
	ASIEDU MAVIS	Female	1	10	0.00877193	2	10	0.0277778	0.0258772	0.0239766	0.022076	0.0201754	0.0182749
	ATIEMO JOSEPHINE	Female	1	60	0.0526316	2	60	0.166667	0.155263	0.14386	0.132456	0.121053	0.109649
	AWUDER WILLIAM YAO	Male	2	65	0.114035	3	65	0.270833	0.255154	0.239474	0.223794	0.208114	0.192434
297	ADARKWAH IRENE	Female
	AYER PERCY OKAI	Male	1	30	0.0263158	2	30	0.0833333	0.0776316	0.0719298	0.0662281	0.0605263	0.0548246
	AYISI BENJAMIN	Male	3	35	0.0921053	4	35	0.194444	0.184211	0.173977	0.163743	0.153509	0.143275
	AZAMETSI MIRABLE	Female	2	25	0.0438596	3	25	0.104167	0.098136	0.0921053	0.0860746	0.0800439	0.0740132
298	ADDAE PORTIA	Female
	BEDIAKO PRISCILLA ODURO	Female	4	10	0.0350877	5	10	0.0694444	0.0660088	0.0625731	0.0591374	0.0557018	0.0522661
	BELLEY BETTY	Female	1	30	0.0263158	2	30	0.0833333	0.0776316	0.0719298	0.0662281	0.0605263	0.0548246
	BOATEMAA SLYVIA	Female	2	45	0.0789474	3	45	0.1875	0.176645	0.165789	0.154934	0.144079	0.133224
299	ADDEY AUGUSTINE	Male
	BOATENG ABRAHAM AMEGAVIE	Male	2	35	0.0614035	3	35	0.145833	0.13739	0.128947	0.120504	0.112061	0.103618
	BONDZIE SAMUEL AIDOO	Male	3	65	0.171053	4	65	0.361111	0.342105	0.323099	0.304094	0.285088	0.266082
	BONI MAXWELL EDEM	Male	4	50	0.175439	5	50	0.347222	0.330044	0.312865	0.295687	0.278509	0.26133
300	ADDICO FRANCIS AWULEY	Male
	BOTCHWAY HANNAH	Female	2	30	0.0526316	3	30	0.125	0.117763	0.110526	0.103289	0.0960526	0.0888158
	BOTCHWAY JEMIMA ATSWEI	Female	3	20	0.0526316	4	20	0.111111	0.105263	0.0994152	0.0935673	0.0877193	0.0818713
	BOTCHWAY MICHAEL	Male	2	10	0.0175439	3	10	0.0416667	0.0392544	0.0368421	0.0344298	0.0320175	0.0296053
301	ADDISON EMMANUEL	Male
	BOYETEY SOLOMON BUERNOR	Male	2	15	0.0263158	3	15	0.0625	0.0588816	0.0552632	0.0516447	0.0480263	0.0444079
	BRENYAH SYLVESTER	Male	6	40	0.210526	7	40	0.388889	0.371053	0.353216	0.33538	0.317544	0.299708
	CLELAND VERA VASTU	Female	2	20	0.0350877	2	20	0.0555556	0.0535088	0.051462	0.0494152	0.0473684	0.0453216
302	ADDISON STEPHEN EBO	Male
	DADZIE ISAAC	Male	1	40	0.0350877	1	40	0.0555556	0.0535088	0.051462	0.0494152	0.0473684	0.0453216
	DAMALIE DEBORAH YAYRA	Female	1	50	0.0438596	1	50	0.0694444	0.066886	0.0643275	0.061769	0.0592105	0.056652
	DARKO MOSES	Male	6	25	0.131579	6	25	0.208333	0.200658	0.192982	0.185307	0.177632	0.169956
303	ADDO NAOMI	Female
	DARKOA DORA	Female	2	40	0.0701754	2	40	0.111111	0.107018	0.102924	0.0988304	0.0947368	0.0906433
	DENTAAH AMPOFO PATIENCE O.	Female	2	20	0.0350877	2	20	0.0555556	0.0535088	0.051462	0.0494152	0.0473684	0.0453216
	DJIDONU DANIEL KWESI	Male	2	30	0.0526316	2	30	0.0833333	0.0802632	0.077193	0.0741228	0.0710526	0.0679825
304	ADDO PATIENCE	Female
	DOE KENNEDY	Male	1	10	0.00877193	1	10	0.0138889	0.0133772	0.0128655	0.0123538	0.0118421	0.0113304
	DOKU ESTHER MAKU	Female	2	20	0.0350877	2	20	0.0555556	0.0535088	0.051462	0.0494152	0.0473684	0.0453216
	DOWUONA PRISCILLA NORKAI	Female	2	30	0.0526316	2	30	0.0833333	0.0802632	0.077193	0.0741228	0.0710526	0.0679825
305	ADDY MELIORA GENEVIEVE	Female
	DZRAMADO SANDRA	Female	2	40	0.0701754	2	40	0.111111	0.107018	0.102924	0.0988304	0.0947368	0.0906433
	DZUFLE BRIDGET	Female	5	50	0.219298	5	50	0.347222	0.33443	0.321637	0.308845	0.296053	0.28326
	EDZEOU BERNARD	Male	6	60	0.315789	6	60	0.5	0.481579	0.463158	0.444737	0.426316	0.407895
306	ADEKPUITOR PETER	Male
	ENTSIEH EVANS	Male	6	70	0.368421	6	70	0.583333	0.561842	0.540351	0.51886	0.497368	0.475877
	FOMETU GLADYS COURINE	Female	3	80	0.210526	3	80	0.333333	0.321053	0.308772	0.296491	0.284211	0.27193
	GANYO REBECCA EYRAM	Female	2	10	0.0175439	2	10	0.0277778	0.0267544	0.025731	0.0247076	0.0236842	0.0226608
307	ADEKU CALEB KOJO	Male
	GBADGO CHARLOTTE	Female	2	5	0.00877193	2	5	0.0138889	0.0133772	0.0128655	0.0123538	0.0118421	0.0113304
	GODOMEY ABRAHAM	Male	2	10	0.0175439	2	10	0.0277778	0.0267544	0.025731	0.0247076	0.0236842	0.0226608
	GYAN FELICIA	Female	2	15	0.0263158	2	15	0.0416667	0.0401316	0.0385965	0.0370614	0.0355263	0.0339912
308	ADETI CLIFFORD KWABLA	Male
	GYAN MANTEY	Male	2	20	0.0350877	2	20	0.0555556	0.0535088	0.051462	0.0494152	0.0473684	0.0453216
	GYEKYE EMMANUEL	Male	3	25	0.0657895	3	25	0.104167	0.100329	0.0964912	0.0926535	0.0888158	0.0849781
	HAGAN EDWIN EBOH	Male	2	30	0.0526316	2	30	0.0833333	0.0802632	0.077193	0.0741228	0.0710526	0.0679825
309	ADINKRAH ABIGAIL	Female
	HAMMOND NATHANIEL	Male	5	35	0.153509	5	35	0.243056	0.234101	0.225146	0.216192	0.207237	0.198282
	IBRAHIM MOHAMMED SANUSI	Male	3	40	0.105263	3	40	0.166667	0.160526	0.154386	0.148246	0.142105	0.135965
	IBRAHIM SEMIRATU	Female	5	45	0.197368	5	45	0.3125	0.300987	0.289474	0.277961	0.266447	0.254934
310	ADIOK JOSHUA ALLEN	Male
	INUSAH MOHAMMED	Male	3	50	0.131579	3	50	0.208333	0.200658	0.192982	0.185307	0.177632	0.169956
	KABAH ALIAYIRE ALEX	Male	4	55	0.192982	4	55	0.305556	0.294298	0.283041	0.271784	0.260526	0.249269
	KELVIN NKANSAH	Male	3	60	0.157895	3	60	0.25	0.240789	0.231579	0.222368	0.213158	0.203947
311	ADJAKLOE FLOSSIE DZIFA	Female
	KUDJUH BRIGHT DOSU	Male	2	65	0.114035	2	65	0.180556	0.173904	0.167251	0.160599	0.153947	0.147295
	KUMI DANIEL DARKO	Male	1	70	0.0614035	1	70	0.0972222	0.0936404	0.0900585	0.0864766	0.0828947	0.0793129
	KUMI MARY POKUAA	Female	2	5	0.00877193	2	5	0.0138889	0.0133772	0.0128655	0.0123538	0.0118421	0.0113304
312	ADJASOO LINDA SELINAM	Female
	KUSI LYDIA ADJOA ADJEIWAA	Female	4	10	0.0350877	4	10	0.0555556	0.0535088	0.051462	0.0494152	0.0473684	0.0453216
	KWARTENG JESSE SARPONG	Male	5	20	0.0877193	5	20	0.138889	0.133772	0.128655	0.123538	0.118421	0.113304
	LANTEI- LAMPTEY JESSE NII	Male	2	20	0.0350877	2	20	0.0555556	0.0535088	0.051462	0.0494152	0.0473684	0.0453216
313	ADJEI - BAAH STEPHEN	Male
	MASOPEH FELICIA VANILLA NAA AMELEY	Female	4	25	0.0877193	4	25	0.138889	0.133772	0.128655	0.123538	0.118421	0.113304
	MENDS FIDELIA APPIAH	Female	3	30	0.0789474	3	30	0.125	0.120395	0.115789	0.111184	0.106579	0.101974
	MENSAH BETTY TELUS	Female	2	35	0.0614035	2	35	0.0972222	0.0936404	0.0900585	0.0864766	0.0828947	0.0793129
314	ADJEI BELINDA ADJETEY	Female
	MENSAH CHARLES GYAMFI	Male	2	10	0.0175439	2	5	0.0138889	0.0142544	0.0146199	0.0149854	0.0153509	0.0157164
	MENSAH PHILOMINA TECHIE	Female	3	20	0.0526316	3	15	0.0625	0.0615132	0.0605263	0.0595395	0.0585526	0.0575658
	MENYE GODWIN JR	Male	3	30	0.0789474	3	25	0.104167	0.101645	0.0991228	0.0966009	0.0940789	0.091557
315	ADJEI DANIEL	Male
	MOHAMMED ADAM ZAKIYU	Male	3	5	0.0131579	3	10	0.0416667	0.0388158	0.0359649	0.033114	0.0302632	0.0274123
	NARTEH GEOFFREY	Male	2	15	0.0263158	2	20	0.0555556	0.0526316	0.0497076	0.0467836	0.0438596	0.0409357
	NKANSAH LOCTUS ADJEI	Female	1	25	0.0219298	1	30	0.0416667	0.039693	0.0377193	0.0357456	0.0337719	0.0317982
316	ADJEI HENRY	Male
	NORTEY NICHOLAS	Male	5	10	0.0438596	5	10	0.0694444	0.066886	0.0643275	0.061769	0.0592105	0.056652
	NUAMAH SAMUEL	Male	2	60	0.105263	2	60	0.166667	0.160526	0.154386	0.148246	0.142105	0.135965
	NUKPE DAVID CONVERY	Male	7	65	0.399123	7	65	0.631944	0.608662	0.58538	0.562098	0.538816	0.515534
317	ADJEI JENNIFER ODUA	Female
	NYARKO ANISA	Female	2	30	0.0526316	2	30	0.0833333	0.0802632	0.077193	0.0741228	0.0710526	0.0679825
	NYARKO NICHOLAS	Male	2	35	0.0614035	2	35	0.0972222	0.0936404	0.0900585	0.0864766	0.0828947	0.0793129
	NYARKO WILLIAM KWABENA	Male	1	25	0.0219298	1	25	0.0347222	0.033443	0.0321637	0.0308845	0.0296053	0.028326
318	ADJEIBEA RACHEAL	Female
	NYEDU ISHMAEL	Male	4	10	0.0350877	4	10	0.0555556	0.0535088	0.051462	0.0494152	0.0473684	0.0453216
	OBENG JULIANA	Female	3	30	0.0789474	3	30	0.125	0.120395	0.115789	0.111184	0.106579	0.101974
	OBUOBI SOLOMON	Male	3	45	0.118421	3	45	0.1875	0.180592	0.173684	0.166776	0.159868	0.152961
319	ADJETEY ERAMI NII ADJEI	Male
	ODOI ERIC AKO	Male	5	35	0.153509	5	35	0.243056	0.234101	0.225146	0.216192	0.207237	0.198282
	OFFEI OSEI FRANCIS	Male	4	65	0.22807	4	65	0.361111	0.347807	0.334503	0.321199	0.307895	0.294591
	OPOKU SAMUEL	Male	2	50	0.0877193	2	50	0.138889	0.133772	0.128655	0.123538	0.118421	0.113304
320	ADJIN-TETTEY JEREMIAH	Male
	OPOKUA GIFTY NANA AMA	Female	2	30	0.0526316	2	30	0.0833333	0.0802632	0.077193	0.0741228	0.0710526	0.0679825
	OSEI RICHMOND KOFI	Male	3	20	0.0526316	3	20	0.0833333	0.0802632	0.077193	0.0741228	0.0710526	0.0679825
	OUEDORAOGO ROGER PETER	Male	6	10	0.0526316	6	10	0.0833333	0.0802632	0.077193	0.0741228	0.0710526	0.0679825
321	ADJOKATSE BERNICE	Female
	OWUSU ALEX	Male	4	15	0.0526316	4	15	0.0833333	0.0802632	0.077193	0.0741228	0.0710526	0.0679825
	OWUSU-APENTENG STEPHEN	Male	3	40	0.105263	3	40	0.166667	0.160526	0.154386	0.148246	0.142105	0.135965
	PARRY JESSICA	Male	2	20	0.0350877	2	20	0.0555556	0.0535088	0.051462	0.0494152	0.0473684	0.0453216
322	ADOM JENNIFER ESTHER OHENEBA	Female
	QUAICOE ENOCH	Male	2	40	0.0701754	2	40	0.111111	0.107018	0.102924	0.0988304	0.0947368	0.0906433
	QUANSAH BELINDA	Female	3	50	0.131579	3	50	0.208333	0.200658	0.192982	0.185307	0.177632	0.169956
	QUARTEY EVELYN NAA KWARLEY	Female	7	25	0.153509	7	25	0.243056	0.234101	0.225146	0.216192	0.207237	0.198282
323	ADOM KWADWO BOAKYE	Male
	QUARTEY SALOMEY	Female	2	40	0.0701754	2	40	0.111111	0.107018	0.102924	0.0988304	0.0947368	0.0906433
	SAHEED AZEEZAT	Female	2	20	0.0350877	2	20	0.0555556	0.0535088	0.051462	0.0494152	0.0473684	0.0453216
	SHAIBU FAUZIYATU	Female	2	30	0.0526316	2	30	0.0833333	0.0802632	0.077193	0.0741228	0.0710526	0.0679825
324	ADU BONA SUSANNA	Female
	SOWAH ALEXANDRA ENYONAM	Female	4	10	0.0350877	4	10	0.0555556	0.0535088	0.051462	0.0494152	0.0473684	0.0453216
	SULLEY HINDU MUNIRU	Female	3	20	0.0526316	3	20	0.0833333	0.0802632	0.077193	0.0741228	0.0710526	0.0679825
	TAGOE DAVID	Male	4	30	0.105263	4	30	0.166667	0.160526	0.154386	0.148246	0.142105	0.135965
325	ADU DORA	Female
	TAWIAH ADAMA OKOE	Male	2	40	0.0701754	2	40	0.111111	0.107018	0.102924	0.0988304	0.0947368	0.0906433
	TETTEH KELVIN	Male	3	50	0.131579	3	50	0.208333	0.200658	0.192982	0.185307	0.177632	0.169956
	TETTEH MALVIN	Male	4	60	0.210526	4	60	0.333333	0.321053	0.308772	0.296491	0.284211	0.27193
326	ADU PRISCILLA NKETIA	Female
	WADIE LINDA NKANSAH	Female	5	70	0.307018	5	70	0.486111	0.468202	0.450292	0.432383	0.414474	0.396564
	WENOMA LINDA	Female	3	80	0.210526	3	80	0.333333	0.321053	0.308772	0.296491	0.284211	0.27193
	YARTEY SEFIATU	Female	2	10	0.0175439	2	10	0.0277778	0.0267544	0.025731	0.0247076	0.0236842	0.0226608
327	ADU-AGYEI AWURA AKUA	Female
	OWUSU ALEX	Male	2	5	0.00877193	2	5	0.0138889	0.0133772	0.0128655	0.0123538	0.0118421	0.0113304
	OWUSU-APENTENG STEPHEN	Male	2	10	0.0175439	2	10	0.0277778	0.0267544	0.025731	0.0247076	0.0236842	0.0226608
	PARRY JESSICA	Male	3	15	0.0394737	3	15	0.0625	0.0601974	0.0578947	0.0555921	0.0532895	0.0509868
328	ADU-TWUM FREDERICK ASANTE	Male
	QUAICOE ENOCH	Male	2	20	0.0350877	2	20	0.0555556	0.0535088	0.051462	0.0494152	0.0473684	0.0453216
	QUANSAH BELINDA	Female	2	25	0.0438596	2	25	0.0694444	0.066886	0.0643275	0.061769	0.0592105	0.056652
	QUARTEY EVELYN NAA KWARLEY	Female	3	30	0.0789474	3	30	0.125	0.120395	0.115789	0.111184	0.106579	0.101974
329	ADUSEI GIFTY YEBOAH	Female
	QUARTEY SALOMEY	Female	2	35	0.0614035	2	35	0.0972222	0.0936404	0.0900585	0.0864766	0.0828947	0.0793129
	SAHEED AZEEZAT	Female	3	40	0.105263	3	40	0.166667	0.160526	0.154386	0.148246	0.142105	0.135965
	SHAIBU FAUZIYATU	Female	2	45	0.0789474	2	45	0.125	0.120395	0.115789	0.111184	0.106579	0.101974
330	ADUUM REBECCA	Female
	AFARI STEPHEN	Male	2	50	0.0877193	2	50	0.138889	0.133772	0.128655	0.123538	0.118421	0.113304
	AFOTEY PATRICK DUNYO	Male	3	55	0.144737	3	55	0.229167	0.220724	0.212281	0.203838	0.195395	0.186952
	AFRAH TRACY NTOW	Female	2	60	0.105263	2	60	0.166667	0.160526	0.154386	0.148246	0.142105	0.135965
331	ABABIO ABEDNEGO A.	Male
	ABOAGYE ELIZABETH BOADIWAA	Female	7	10	0.0614035	6	10	0.0833333	0.0811404	0.0789474	0.0767544	0.0745614	0.0723684
	ABOE ANDREWS	Male	5	60	0.263158	4	60	0.333333	0.326316	0.319298	0.312281	0.305263	0.298246
	ABRAHAM-QUANSAH MARY EVA	Female	4	65	0.22807	3	65	0.270833	0.266557	0.262281	0.258004	0.253728	0.249452
332	ABALEM JENNIFER	Female
	ADDAE SANDRA	Female	4	30	0.105263	1	30	0.0416667	0.0480263	0.054386	0.0607456	0.0671053	0.0734649
	ADJEI FREDERICK YAW	Male	5	35	0.153509	2	35	0.0972222	0.102851	0.10848	0.114108	0.119737	0.125365
	ADJEI PRINCE BAFFOUR	Male	6	25	0.131579	1	25	0.0347222	0.0444079	0.0540936	0.0637792	0.0734649	0.0831506
333	ABBAN VIDA OWUSU	Female
	ADJEI SAMUEL	Male	7	50	0.307018	2	10	0.0277778	0.0557018	0.0836257	0.11155	0.139474	0.167398
	ADJORLOLO MERCY NORKPLIM	Female	4	30	0.105263	3	30	0.125	0.123026	0.121053	0.119079	0.117105	0.115132
	ADOCTOR VICTORIA	Female	5	45	0.197368	4	45	0.25	0.244737	0.239474	0.234211	0.228947	0.223684
334	ADU AFRIYIE	Male
	ADU EMMANUEL	Male	7	35	0.214912	6	35	0.291667	0.283991	0.276316	0.26864	0.260965	0.253289
	ADZOWU MILLICENT	Female	1	10	0.00877193	2	65	0.180556	0.163377	0.146199	0.12902	0.111842	0.0946637
	AFORDE JAMES ABLORDE	Male	2	50	0.0877193	2	50	0.138889	0.133772	0.128655	0.123538	0.118421	0.113304
335	ABDALLAH FATIMATU	Female
	AGBENYEGA STEPHEN	Male	4	30	0.105263	3	30	0.125	0.123026	0.121053	0.119079	0.117105	0.115132
	AGBOGBA LANDRY KWAME	Male	5	20	0.0877193	4	20	0.111111	0.108772	0.106433	0.104094	0.101754	0.0994152
	AGGERH BARNABAS KOBBY	Male	6	10	0.0526316	5	10	0.0694444	0.0677632	0.0660819	0.0644006	0.0627193	0.061038
336	ABDULAI FAIZA	Female
	AGOE JEHOSHAPHAT SOWAH	Male	2	15	0.0263158	1	15	0.0208333	0.0213816	0.0219298	0.0224781	0.0230263	0.0235746
	AGUDA NARKIE PATRICIA	Female	3	40	0.105263	2	40	0.111111	0.110526	0.109942	0.109357	0.108772	0.108187
	AGYARE PRISCILLA DARFOUR	Female	2	20	0.0350877	1	20	0.0277778	0.0285088	0.0292398	0.0299708	0.0307018	0.0314327
337	ABEKAH EMMANUEL	Male
	AGYEI RICHARD KWAME	Male	4	40	0.140351	1	40	0.0555556	0.0640351	0.0725146	0.0809942	0.0894737	0.0979532
	AGYEMAN DUAH BOATEMAA	Female	4	50	0.175439	2	50	0.138889	0.142544	0.146199	0.149854	0.153509	0.157164
	AGYEMAN PAUL BOAKYE	Male	3	25	0.0657895	1	25	0.0347222	0.0378289	0.0409357	0.0440424	0.0471491	0.0502558
338	ABOAGYE DAVID ADU	Male
	AGYIRI GEORGINA	Female	3	40	0.105263	1	40	0.0555556	0.0605263	0.0654971	0.0704678	0.0754386	0.0804094
	AHIABLEY PORTIA	Female	4	20	0.0701754	2	20	0.0555556	0.0570175	0.0584795	0.0599415	0.0614035	0.0628655
	AHONI MAUDLIN AYONGO	Female	4	30	0.105263	2	30	0.0833333	0.0855263	0.0877193	0.0899123	0.0921053	0.0942982
339	ABOAGYE FELIX	Male
	AKAGBO REBECCA	Female	4	30	0.105263	1	10	0.0138889	0.0230263	0.0321637	0.0413012	0.0504386	0.059576
	AKOTO REINDOLF APPIAH	Male	2	20	0.0350877	4	20	0.111111	0.103509	0.0959064	0.0883041	0.0807018	0.0730994
	AKUFFO GIDEON	Male	1	30	0.0263158	1	30	0.0416667	0.0401316	0.0385965	0.0370614	0.0355263	0.0339912
340	ABU ABDUL MANAF	Male
	ALAGBO EMMANUEL	Male	3	40	0.105263	2	40	0.111111	0.110526	0.109942	0.109357	0.108772	0.108187
	ALLOTEY KPAKPO VINCENT	Male	2	50	0.0877193	1	50	0.0694444	0.0712719	0.0730994	0.0749269	0.0767544	0.0785819
	ALLOTEY PEARL NAA AKU	Female	2	60	0.105263	1	60	0.0833333	0.0855263	0.0877193	0.0899123	0.0921053	0.0942982
341	ABUBAKAR ARAFAT SUFYAN	Male
	AMAKYE JAMES SARPONG	Male	7	70	0.429825	6	70	0.583333	0.567982	0.552632	0.537281	0.52193	0.506579
	AMEVOR ERIC	Male	5	80	0.350877	4	80	0.444444	0.435088	0.425731	0.416374	0.407018	0.397661
	AMOAH CHARLOTTE KORKOR	Female	4	10	0.0350877	3	10	0.0416667	0.0410088	0.0403509	0.039693	0.0390351	0.0383772
342	ACHEAMPONG CHRISTABEL	Female
	AMOAH MILDRED	Female	4	5	0.0175439	3	5	0.0208333	0.0205044	0.0201754	0.0198465	0.0195175	0.0191886
	AMOAKO ERNESTINA OPOKUA	Female	2	10	0.0175439	1	10	0.0138889	0.0142544	0.0146199	0.0149854	0.0153509	0.0157164
	AMPONSAH CECILIA ABENA	Female	1	15	0.0131579	1	15	0.0208333	0.0200658	0.0192982	0.0185307	0.0177632	0.0169956
343	ACHEAMPONG KINGSLEY	Male
	AMUZU STELLA KABUKI	Female	5	20	0.0877193	4	20	0.111111	0.108772	0.106433	0.104094	0.101754	0.0994152
	ANABI MUSAH AHMED	Male	6	25	0.131579	5	25	0.173611	0.169408	0.165205	0.161001	0.156798	0.152595
	ANDERSON GIFTY	Female	2	30	0.0526316	1	30	0.0416667	0.0427632	0.0438596	0.0449561	0.0460526	0.0471491
344	ACHEAMPONG MICHAEL APPIAH	Male
	ANDERSON VIVIAN	Female	3	35	0.0921053	2	35	0.0972222	0.0967105	0.0961988	0.0956871	0.0951754	0.0946637
	ANKOMAH GEORGINA	Female	3	40	0.105263	2	40	0.111111	0.110526	0.109942	0.109357	0.108772	0.108187
	ANNANG FRANCISCA TORSHIE	Female	2	45	0.0789474	1	45	0.0625	0.0641447	0.0657895	0.0674342	0.0690789	0.0707237
345	ACQUAH BENJAMIN	Male
	ANNOR RICHAEL	Female	2	50	0.0877193	1	50	0.0694444	0.0712719	0.0730994	0.0749269	0.0767544	0.0785819
	ANSAH FAUSTINA	Female	3	55	0.144737	2	55	0.152778	0.151974	0.15117	0.150365	0.149561	0.148757
	ANSAH MARFO DOREEN	Female	2	60	0.105263	1	60	0.0833333	0.0855263	0.0877193	0.0899123	0.0921053	0.0942982
346	ACQUAH KINGSLEY OCANSEY	Male
	ANTHONIO HENRIETTA	Female	3	65	0.171053	2	65	0.180556	0.179605	0.178655	0.177705	0.176754	0.175804
	APPIAH ISAAC	Male	2	70	0.122807	1	70	0.0972222	0.0997807	0.102339	0.104898	0.107456	0.110015
	APPIAH MOSES	Male	6	5	0.0263158	5	5	0.0347222	0.0338816	0.0330409	0.0322003	0.0313596	0.030519
347	ACQUAH PHILIP	Male
	APPIAH PRINCE KWESI	Male	2	20	0.0350877	3	10	0.0416667	0.0410088	0.0403509	0.039693	0.0390351	0.0383772
	ARKO HAGAR	Female	3	25	0.0657895	4	20	0.111111	0.106579	0.102047	0.0975146	0.0929825	0.0884503
	ARKOH GALAHAD AHINSAH	Female	2	20	0.0350877	3	20	0.0833333	0.0785088	0.0736842	0.0688596	0.0640351	0.0592105
348	ADAM HALIMATU SADIA	Female
	ARTHUR EBENEZER	Male	6	25	0.131579	4	25	0.138889	0.138158	0.137427	0.136696	0.135965	0.135234
	ARTHUR ESSUMAN JAMES	Male	6	30	0.157895	4	30	0.166667	0.165789	0.164912	0.164035	0.163158	0.162281
	ARYEETEY MESHACK	Male	4	35	0.122807	3	35	0.145833	0.143531	0.141228	0.138925	0.136623	0.13432
349	ADAMA-TETTEY MARYNSKY	Female
	ASABIRE SOPHIA	Female	4	30	0.105263	3	6	0.025	0.0330263	0.0410526	0.0490789	0.0571053	0.0651316
	ASAHENE EMMANUELLA	Female	4	25	0.0877193	3	12	0.05	0.0537719	0.0575439	0.0613158	0.0650877	0.0688596
	ASAMANY CARL	Male	6	15	0.0789474	4	18	0.1	0.0978947	0.0957895	0.0936842	0.0915789	0.0894737
350	ADAMS AFISHETU	Female
	ASAMOAH MERCY	Female	5	24	0.105263	4	24	0.133333	0.130526	0.127719	0.124912	0.122105	0.119298
	ASARE ERIC AGYIRI AWERE	Male	5	27	0.118421	4	27	0.15	0.146842	0.143684	0.140526	0.137368	0.134211
	ASHITEY MCZILL HAFIZ OKO	Male	2	30	0.0526316	3	30	0.125	0.117763	0.110526	0.103289	0.0960526	0.0888158
351	ADAMS ANASS	Male
	ASIEDU MAVIS	Female	1	10	0.00877193	2	10	0.0277778	0.0258772	0.0239766	0.022076	0.0201754	0.0182749
	ATIEMO JOSEPHINE	Female	1	60	0.0526316	2	60	0.166667	0.155263	0.14386	0.132456	0.121053	0.109649
	AWUDER WILLIAM YAO	Male	2	65	0.114035	3	65	0.270833	0.255154	0.239474	0.223794	0.208114	0.192434
352	ADARKWAH IRENE	Female
	AYER PERCY OKAI	Male	1	30	0.0263158	2	30	0.0833333	0.0776316	0.0719298	0.0662281	0.0605263	0.0548246
	AYISI BENJAMIN	Male	3	35	0.0921053	4	35	0.194444	0.184211	0.173977	0.163743	0.153509	0.143275
	AZAMETSI MIRABLE	Female	2	25	0.0438596	3	25	0.104167	0.098136	0.0921053	0.0860746	0.0800439	0.0740132
353	ADDAE PORTIA	Female
	BEDIAKO PRISCILLA ODURO	Female	4	10	0.0350877	5	10	0.0694444	0.0660088	0.0625731	0.0591374	0.0557018	0.0522661
	BELLEY BETTY	Female	1	30	0.0263158	2	30	0.0833333	0.0776316	0.0719298	0.0662281	0.0605263	0.0548246
	BOATEMAA SLYVIA	Female	2	45	0.0789474	3	45	0.1875	0.176645	0.165789	0.154934	0.144079	0.133224
354	ADDEY AUGUSTINE	Male
	BOATENG ABRAHAM AMEGAVIE	Male	2	35	0.0614035	3	35	0.145833	0.13739	0.128947	0.120504	0.112061	0.103618
	BONDZIE SAMUEL AIDOO	Male	3	65	0.171053	4	65	0.361111	0.342105	0.323099	0.304094	0.285088	0.266082
	BONI MAXWELL EDEM	Male	4	50	0.175439	5	50	0.347222	0.330044	0.312865	0.295687	0.278509	0.26133
355	ADDICO FRANCIS AWULEY	Male
	BOTCHWAY HANNAH	Female	2	30	0.0526316	3	30	0.125	0.117763	0.110526	0.103289	0.0960526	0.0888158
	BOTCHWAY JEMIMA ATSWEI	Female	3	20	0.0526316	4	20	0.111111	0.105263	0.0994152	0.0935673	0.0877193	0.0818713
	BOTCHWAY MICHAEL	Male	2	10	0.0175439	3	10	0.0416667	0.0392544	0.0368421	0.0344298	0.0320175	0.0296053
356	ADDISON EMMANUEL	Male
	BOYETEY SOLOMON BUERNOR	Male	2	15	0.0263158	3	15	0.0625	0.0588816	0.0552632	0.0516447	0.0480263	0.0444079
	BRENYAH SYLVESTER	Male	6	40	0.210526	7	40	0.388889	0.371053	0.353216	0.33538	0.317544	0.299708
	CLELAND VERA VASTU	Female	2	20	0.0350877	2	20	0.0555556	0.0535088	0.051462	0.0494152	0.0473684	0.0453216
357	ADDISON STEPHEN EBO	Male
	DADZIE ISAAC	Male	1	40	0.0350877	1	40	0.0555556	0.0535088	0.051462	0.0494152	0.0473684	0.0453216
	DAMALIE DEBORAH YAYRA	Female	1	50	0.0438596	1	50	0.0694444	0.066886	0.0643275	0.061769	0.0592105	0.056652
	DARKO MOSES	Male	6	25	0.131579	6	25	0.208333	0.200658	0.192982	0.185307	0.177632	0.169956
358	ADDO NAOMI	Female
	DARKOA DORA	Female	2	40	0.0701754	2	40	0.111111	0.107018	0.102924	0.0988304	0.0947368	0.0906433
	DENTAAH AMPOFO PATIENCE O.	Female	2	20	0.0350877	2	20	0.0555556	0.0535088	0.051462	0.0494152	0.0473684	0.0453216
	DJIDONU DANIEL KWESI	Male	2	30	0.0526316	2	30	0.0833333	0.0802632	0.077193	0.0741228	0.0710526	0.0679825
359	ADDO PATIENCE	Female
	DOE KENNEDY	Male	1	10	0.00877193	1	10	0.0138889	0.0133772	0.0128655	0.0123538	0.0118421	0.0113304
	DOKU ESTHER MAKU	Female	2	20	0.0350877	2	20	0.0555556	0.0535088	0.051462	0.0494152	0.0473684	0.0453216
	DOWUONA PRISCILLA NORKAI	Female	2	30	0.0526316	2	30	0.0833333	0.0802632	0.077193	0.0741228	0.0710526	0.0679825
360	ADDY MELIORA GENEVIEVE	Female
	DZRAMADO SANDRA	Female	2	40	0.0701754	2	40	0.111111	0.107018	0.102924	0.0988304	0.0947368	0.0906433
	DZUFLE BRIDGET	Female	5	50	0.219298	5	50	0.347222	0.33443	0.321637	0.308845	0.296053	0.28326
	EDZEOU BERNARD	Male	6	60	0.315789	6	60	0.5	0.481579	0.463158	0.444737	0.426316	0.407895
361	ADEKPUITOR PETER	Male
	ENTSIEH EVANS	Male	6	70	0.368421	6	70	0.583333	0.561842	0.540351	0.51886	0.497368	0.475877
	FOMETU GLADYS COURINE	Female	3	80	0.210526	3	80	0.333333	0.321053	0.308772	0.296491	0.284211	0.27193
	GANYO REBECCA EYRAM	Female	2	10	0.0175439	2	10	0.0277778	0.0267544	0.025731	0.0247076	0.0236842	0.0226608
362	ADEKU CALEB KOJO	Male
	GBADGO CHARLOTTE	Female	2	5	0.00877193	2	5	0.0138889	0.0133772	0.0128655	0.0123538	0.0118421	0.0113304
	GODOMEY ABRAHAM	Male	2	10	0.0175439	2	10	0.0277778	0.0267544	0.025731	0.0247076	0.0236842	0.0226608
	GYAN FELICIA	Female	2	15	0.0263158	2	15	0.0416667	0.0401316	0.0385965	0.0370614	0.0355263	0.0339912
363	ADETI CLIFFORD KWABLA	Male
	GYAN MANTEY	Male	2	20	0.0350877	2	20	0.0555556	0.0535088	0.051462	0.0494152	0.0473684	0.0453216
	GYEKYE EMMANUEL	Male	3	25	0.0657895	3	25	0.104167	0.100329	0.0964912	0.0926535	0.0888158	0.0849781
	HAGAN EDWIN EBOH	Male	2	30	0.0526316	2	30	0.0833333	0.0802632	0.077193	0.0741228	0.0710526	0.0679825
364	ADINKRAH ABIGAIL	Female
	HAMMOND NATHANIEL	Male	5	35	0.153509	5	35	0.243056	0.234101	0.225146	0.216192	0.207237	0.198282
	IBRAHIM MOHAMMED SANUSI	Male	3	40	0.105263	3	40	0.166667	0.160526	0.154386	0.148246	0.142105	0.135965
	IBRAHIM SEMIRATU	Female	5	45	0.197368	5	45	0.3125	0.300987	0.289474	0.277961	0.266447	0.254934
365	ADIOK JOSHUA ALLEN	Male
	INUSAH MOHAMMED	Male	3	50	0.131579	3	50	0.208333	0.200658	0.192982	0.185307	0.177632	0.169956
	KABAH ALIAYIRE ALEX	Male	4	55	0.192982	4	55	0.305556	0.294298	0.283041	0.271784	0.260526	0.249269
	KELVIN NKANSAH	Male	3	60	0.157895	3	60	0.25	0.240789	0.231579	0.222368	0.213158	0.203947
366	ADJAKLOE FLOSSIE DZIFA	Female
	KUDJUH BRIGHT DOSU	Male	2	65	0.114035	2	65	0.180556	0.173904	0.167251	0.160599	0.153947	0.147295
	KUMI DANIEL DARKO	Male	1	70	0.0614035	1	70	0.0972222	0.0936404	0.0900585	0.0864766	0.0828947	0.0793129
	KUMI MARY POKUAA	Female	2	5	0.00877193	2	5	0.0138889	0.0133772	0.0128655	0.0123538	0.0118421	0.0113304
367	ADJASOO LINDA SELINAM	Female
	KUSI LYDIA ADJOA ADJEIWAA	Female	4	10	0.0350877	4	10	0.0555556	0.0535088	0.051462	0.0494152	0.0473684	0.0453216
	KWARTENG JESSE SARPONG	Male	5	20	0.0877193	5	20	0.138889	0.133772	0.128655	0.123538	0.118421	0.113304
	LANTEI- LAMPTEY JESSE NII	Male	2	20	0.0350877	2	20	0.0555556	0.0535088	0.051462	0.0494152	0.0473684	0.0453216
368	ADJEI - BAAH STEPHEN	Male
	MASOPEH FELICIA VANILLA NAA AMELEY	Female	4	25	0.0877193	4	25	0.138889	0.133772	0.128655	0.123538	0.118421	0.113304
	MENDS FIDELIA APPIAH	Female	3	30	0.0789474	3	30	0.125	0.120395	0.115789	0.111184	0.106579	0.101974
	MENSAH BETTY TELUS	Female	2	35	0.0614035	2	35	0.0972222	0.0936404	0.0900585	0.0864766	0.0828947	0.0793129
369	ADJEI BELINDA ADJETEY	Female
	MENSAH CHARLES GYAMFI	Male	2	5	0.00877193	2	10	0.0277778	0.0258772	0.0239766	0.022076	0.0201754	0.0182749
	MENSAH PHILOMINA TECHIE	Female	3	10	0.0263158	3	15	0.0625	0.0588816	0.0552632	0.0516447	0.0480263	0.0444079
	MENYE GODWIN JR	Male	3	15	0.0394737	3	20	0.0833333	0.0789474	0.0745614	0.0701754	0.0657895	0.0614035
370	ADJEI DANIEL	Male
	MOHAMMED ADAM ZAKIYU	Male	3	20	0.0526316	3	25	0.104167	0.0990132	0.0938596	0.0887061	0.0835526	0.0783991
	NARTEH GEOFFREY	Male	2	25	0.0438596	2	30	0.0833333	0.079386	0.0754386	0.0714912	0.0675439	0.0635965
	NKANSAH LOCTUS ADJEI	Female	1	30	0.0263158	1	35	0.0486111	0.0463816	0.044152	0.0419225	0.039693	0.0374635
371	ADJEI HENRY	Male
	NORTEY NICHOLAS	Male	5	10	0.0438596	5	10	0.0694444	0.066886	0.0643275	0.061769	0.0592105	0.056652
	NUAMAH SAMUEL	Male	2	60	0.105263	2	60	0.166667	0.160526	0.154386	0.148246	0.142105	0.135965
	NUKPE DAVID CONVERY	Male	7	65	0.399123	7	65	0.631944	0.608662	0.58538	0.562098	0.538816	0.515534
372	ADJEI JENNIFER ODUA	Female
	NYARKO ANISA	Female	2	30	0.0526316	2	30	0.0833333	0.0802632	0.077193	0.0741228	0.0710526	0.0679825
	NYARKO NICHOLAS	Male	2	35	0.0614035	2	35	0.0972222	0.0936404	0.0900585	0.0864766	0.0828947	0.0793129
	NYARKO WILLIAM KWABENA	Male	1	25	0.0219298	1	25	0.0347222	0.033443	0.0321637	0.0308845	0.0296053	0.028326
373	ADJEIBEA RACHEAL	Female
	NYEDU ISHMAEL	Male	4	10	0.0350877	4	10	0.0555556	0.0535088	0.051462	0.0494152	0.0473684	0.0453216
	OBENG JULIANA	Female	3	30	0.0789474	3	30	0.125	0.120395	0.115789	0.111184	0.106579	0.101974
	OBUOBI SOLOMON	Male	3	45	0.118421	3	45	0.1875	0.180592	0.173684	0.166776	0.159868	0.152961
374	ADJETEY ERAMI NII ADJEI	Male
	ODOI ERIC AKO	Male	5	35	0.153509	5	35	0.243056	0.234101	0.225146	0.216192	0.207237	0.198282
	OFFEI OSEI FRANCIS	Male	4	65	0.22807	4	65	0.361111	0.347807	0.334503	0.321199	0.307895	0.294591
	OPOKU SAMUEL	Male	2	50	0.0877193	2	50	0.138889	0.133772	0.128655	0.123538	0.118421	0.113304
375	ADJIN-TETTEY JEREMIAH	Male
	OPOKUA GIFTY NANA AMA	Female	2	30	0.0526316	2	30	0.0833333	0.0802632	0.077193	0.0741228	0.0710526	0.0679825
	OSEI RICHMOND KOFI	Male	3	20	0.0526316	3	20	0.0833333	0.0802632	0.077193	0.0741228	0.0710526	0.0679825
	OUEDORAOGO ROGER PETER	Male	6	10	0.0526316	6	10	0.0833333	0.0802632	0.077193	0.0741228	0.0710526	0.0679825
376	ADJOKATSE BERNICE	Female
	OWUSU ALEX	Male	4	15	0.0526316	4	15	0.0833333	0.0802632	0.077193	0.0741228	0.0710526	0.0679825
	OWUSU-APENTENG STEPHEN	Male	3	40	0.105263	3	40	0.166667	0.160526	0.154386	0.148246	0.142105	0.135965
	PARRY JESSICA	Male	2	20	0.0350877	2	20	0.0555556	0.0535088	0.051462	0.0494152	0.0473684	0.0453216
377	ADOM JENNIFER ESTHER OHENEBA	Female
	QUAICOE ENOCH	Male	2	40	0.0701754	2	40	0.111111	0.107018	0.102924	0.0988304	0.0947368	0.0906433
	QUANSAH BELINDA	Female	3	50	0.131579	3	50	0.208333	0.200658	0.192982	0.185307	0.177632	0.169956
	QUARTEY EVELYN NAA KWARLEY	Female	7	25	0.153509	7	25	0.243056	0.234101	0.225146	0.216192	0.207237	0.198282
378	ADOM KWADWO BOAKYE	Male
	QUARTEY SALOMEY	Female	2	40	0.0701754	2	40	0.111111	0.107018	0.102924	0.0988304	0.0947368	0.0906433
	SAHEED AZEEZAT	Female	2	20	0.0350877	2	20	0.0555556	0.0535088	0.051462	0.0494152	0.0473684	0.0453216
	SHAIBU FAUZIYATU	Female	2	30	0.0526316	2	30	0.0833333	0.0802632	0.077193	0.0741228	0.0710526	0.0679825
379	ADU BONA SUSANNA	Female
	SOWAH ALEXANDRA ENYONAM	Female	4	10	0.0350877	4	10	0.0555556	0.0535088	0.051462	0.0494152	0.0473684	0.0453216
	SULLEY HINDU MUNIRU	Female	3	20	0.0526316	3	20	0.0833333	0.0802632	0.077193	0.0741228	0.0710526	0.0679825
	TAGOE DAVID	Male	4	30	0.105263	4	30	0.166667	0.160526	0.154386	0.148246	0.142105	0.135965
380	ADU DORA	Female
	TAWIAH ADAMA OKOE	Male	2	40	0.0701754	2	40	0.111111	0.107018	0.102924	0.0988304	0.0947368	0.0906433
	TETTEH KELVIN	Male	3	50	0.131579	3	50	0.208333	0.200658	0.192982	0.185307	0.177632	0.169956
	TETTEH MALVIN	Male	4	60	0.210526	4	60	0.333333	0.321053	0.308772	0.296491	0.284211	0.27193
381	ADU PRISCILLA NKETIA	Female
	WADIE LINDA NKANSAH	Female	5	70	0.307018	5	70	0.486111	0.468202	0.450292	0.432383	0.414474	0.396564
	WENOMA LINDA	Female	3	80	0.210526	3	80	0.333333	0.321053	0.308772	0.296491	0.284211	0.27193
	YARTEY SEFIATU	Female	2	10	0.0175439	2	10	0.0277778	0.0267544	0.025731	0.0247076	0.0236842	0.0226608
382	ADU-AGYEI AWURA AKUA	Female
	OWUSU ALEX	Male	2	5	0.00877193	2	5	0.0138889	0.0133772	0.0128655	0.0123538	0.0118421	0.0113304
	OWUSU-APENTENG STEPHEN	Male	2	10	0.0175439	2	10	0.0277778	0.0267544	0.025731	0.0247076	0.0236842	0.0226608
	PARRY JESSICA	Male	3	15	0.0394737	3	15	0.0625	0.0601974	0.0578947	0.0555921	0.0532895	0.0509868
383	ADU-TWUM FREDERICK ASANTE	Male
	QUAICOE ENOCH	Male	2	20	0.0350877	2	20	0.0555556	0.0535088	0.051462	0.0494152	0.0473684	0.0453216
	QUANSAH BELINDA	Female	2	25	0.0438596	2	25	0.0694444	0.066886	0.0643275	0.061769	0.0592105	0.056652
	QUARTEY EVELYN NAA KWARLEY	Female	3	30	0.0789474	3	30	0.125	0.120395	0.115789	0.111184	0.106579	0.101974
384	ADUSEI GIFTY YEBOAH	Female
	QUARTEY SALOMEY	Female	2	35	0.0614035	2	35	0.0972222	0.0936404	0.0900585	0.0864766	0.0828947	0.0793129
	SAHEED AZEEZAT	Female	3	40	0.105263	3	40	0.166667	0.160526	0.154386	0.148246	0.142105	0.135965
	SHAIBU FAUZIYATU	Female	2	45	0.0789474	2	45	0.125	0.120395	0.115789	0.111184	0.106579	0.101974
385	ADUUM REBECCA	Female
	AFARI STEPHEN	Male	2	50	0.0877193	2	50	0.138889	0.133772	0.128655	0.123538	0.118421	0.113304
	AFOTEY PATRICK DUNYO	Male	3	55	0.144737	3	55	0.229167	0.220724	0.212281	0.203838	0.195395	0.186952
	AFRAH TRACY NTOW	Female	2	60	0.105263	2	60	0.166667	0.160526	0.154386	0.148246	0.142105	0.135965
386	ABABIO ABEDNEGO A.	Male
	ABOAGYE ELIZABETH BOADIWAA	Female	7	10	0.0614035	6	10	0.0833333	0.0811404	0.0789474	0.0767544	0.0745614	0.0723684
	ABOE ANDREWS	Male	5	60	0.263158	4	60	0.333333	0.326316	0.319298	0.312281	0.305263	0.298246
	ABRAHAM-QUANSAH MARY EVA	Female	4	65	0.22807	3	65	0.270833	0.266557	0.262281	0.258004	0.253728	0.249452
387	ABALEM JENNIFER	Female
	ADDAE SANDRA	Female	4	30	0.105263	1	30	0.0416667	0.0480263	0.054386	0.0607456	0.0671053	0.0734649
	ADJEI FREDERICK YAW	Male	5	35	0.153509	2	35	0.0972222	0.102851	0.10848	0.114108	0.119737	0.125365
	ADJEI PRINCE BAFFOUR	Male	6	25	0.131579	1	25	0.0347222	0.0444079	0.0540936	0.0637792	0.0734649	0.0831506
388	ABBAN VIDA OWUSU	Female
	ADJEI SAMUEL	Male	7	50	0.307018	2	10	0.0277778	0.0557018	0.0836257	0.11155	0.139474	0.167398
	ADJORLOLO MERCY NORKPLIM	Female	4	30	0.105263	3	30	0.125	0.123026	0.121053	0.119079	0.117105	0.115132
	ADOCTOR VICTORIA	Female	5	45	0.197368	4	45	0.25	0.244737	0.239474	0.234211	0.228947	0.223684
389	ADU AFRIYIE	Male
	ADU EMMANUEL	Male	7	35	0.214912	6	35	0.291667	0.283991	0.276316	0.26864	0.260965	0.253289
	ADZOWU MILLICENT	Female	1	5	0.00438596	2	65	0.180556	0.162939	0.145322	0.127705	0.110088	0.0924708
	AFORDE JAMES ABLORDE	Male	2	50	0.0877193	2	50	0.138889	0.133772	0.128655	0.123538	0.118421	0.113304
390	ABDALLAH FATIMATU	Female
	AGBENYEGA STEPHEN	Male	4	30	0.105263	3	30	0.125	0.123026	0.121053	0.119079	0.117105	0.115132
	AGBOGBA LANDRY KWAME	Male	5	20	0.0877193	4	20	0.111111	0.108772	0.106433	0.104094	0.101754	0.0994152
	AGGERH BARNABAS KOBBY	Male	6	10	0.0526316	5	10	0.0694444	0.0677632	0.0660819	0.0644006	0.0627193	0.061038
391	ABDULAI FAIZA	Female
	AGOE JEHOSHAPHAT SOWAH	Male	2	15	0.0263158	1	15	0.0208333	0.0213816	0.0219298	0.0224781	0.0230263	0.0235746
	AGUDA NARKIE PATRICIA	Female	3	40	0.105263	2	40	0.111111	0.110526	0.109942	0.109357	0.108772	0.108187
	AGYARE PRISCILLA DARFOUR	Female	2	20	0.0350877	1	20	0.0277778	0.0285088	0.0292398	0.0299708	0.0307018	0.0314327
392	ABEKAH EMMANUEL	Male
	AGYEI RICHARD KWAME	Male	4	40	0.140351	1	40	0.0555556	0.0640351	0.0725146	0.0809942	0.0894737	0.0979532
	AGYEMAN DUAH BOATEMAA	Female	4	50	0.175439	2	50	0.138889	0.142544	0.146199	0.149854	0.153509	0.157164
	AGYEMAN PAUL BOAKYE	Male	3	25	0.0657895	1	25	0.0347222	0.0378289	0.0409357	0.0440424	0.0471491	0.0502558
393	ABOAGYE DAVID ADU	Male
	AGYIRI GEORGINA	Female	3	40	0.105263	1	40	0.0555556	0.0605263	0.0654971	0.0704678	0.0754386	0.0804094
	AHIABLEY PORTIA	Female	4	20	0.0701754	2	20	0.0555556	0.0570175	0.0584795	0.0599415	0.0614035	0.0628655
	AHONI MAUDLIN AYONGO	Female	4	30	0.105263	2	30	0.0833333	0.0855263	0.0877193	0.0899123	0.0921053	0.0942982
394	ABOAGYE FELIX	Male
	AKAGBO REBECCA	Female	4	30	0.105263	1	10	0.0138889	0.0230263	0.0321637	0.0413012	0.0504386	0.059576
	AKOTO REINDOLF APPIAH	Male	2	20	0.0350877	4	20	0.111111	0.103509	0.0959064	0.0883041	0.0807018	0.0730994
	AKUFFO GIDEON	Male	1	30	0.0263158	1	30	0.0416667	0.0401316	0.0385965	0.0370614	0.0355263	0.0339912
395	ABU ABDUL MANAF	Male
	ALAGBO EMMANUEL	Male	3	40	0.105263	2	40	0.111111	0.110526	0.109942	0.109357	0.108772	0.108187
	ALLOTEY KPAKPO VINCENT	Male	2	50	0.0877193	1	50	0.0694444	0.0712719	0.0730994	0.0749269	0.0767544	0.0785819
	ALLOTEY PEARL NAA AKU	Female	2	60	0.105263	1	60	0.0833333	0.0855263	0.0877193	0.0899123	0.0921053	0.0942982
396	ABUBAKAR ARAFAT SUFYAN	Male
	AMAKYE JAMES SARPONG	Male	7	70	0.429825	6	70	0.583333	0.567982	0.552632	0.537281	0.52193	0.506579
	AMEVOR ERIC	Male	5	80	0.350877	4	80	0.444444	0.435088	0.425731	0.416374	0.407018	0.397661
	AMOAH CHARLOTTE KORKOR	Female	4	10	0.0350877	3	10	0.0416667	0.0410088	0.0403509	0.039693	0.0390351	0.0383772
397	ACHEAMPONG CHRISTABEL	Female
	AMOAH MILDRED	Female	4	5	0.0175439	3	5	0.0208333	0.0205044	0.0201754	0.0198465	0.0195175	0.0191886
	AMOAKO ERNESTINA OPOKUA	Female	2	10	0.0175439	1	10	0.0138889	0.0142544	0.0146199	0.0149854	0.0153509	0.0157164
	AMPONSAH CECILIA ABENA	Female	1	15	0.0131579	1	15	0.0208333	0.0200658	0.0192982	0.0185307	0.0177632	0.0169956
398	ACHEAMPONG KINGSLEY	Male
	AMUZU STELLA KABUKI	Female	5	20	0.0877193	4	20	0.111111	0.108772	0.106433	0.104094	0.101754	0.0994152
	ANABI MUSAH AHMED	Male	6	25	0.131579	5	25	0.173611	0.169408	0.165205	0.161001	0.156798	0.152595
	ANDERSON GIFTY	Female	2	30	0.0526316	1	30	0.0416667	0.0427632	0.0438596	0.0449561	0.0460526	0.0471491
399	ACHEAMPONG MICHAEL APPIAH	Male
	ANDERSON VIVIAN	Female	3	35	0.0921053	2	35	0.0972222	0.0967105	0.0961988	0.0956871	0.0951754	0.0946637
	ANKOMAH GEORGINA	Female	3	40	0.105263	2	40	0.111111	0.110526	0.109942	0.109357	0.108772	0.108187
	ANNANG FRANCISCA TORSHIE	Female	2	45	0.0789474	1	45	0.0625	0.0641447	0.0657895	0.0674342	0.0690789	0.0707237
400	ACQUAH BENJAMIN	Male
	ANNOR RICHAEL	Female	2	50	0.0877193	1	50	0.0694444	0.0712719	0.0730994	0.0749269	0.0767544	0.0785819
	ANSAH FAUSTINA	Female	3	55	0.144737	2	55	0.152778	0.151974	0.15117	0.150365	0.149561	0.148757
	ANSAH MARFO DOREEN	Female	2	60	0.105263	1	60	0.0833333	0.0855263	0.0877193	0.0899123	0.0921053	0.0942982
401	ACQUAH KINGSLEY OCANSEY	Male
	ANTHONIO HENRIETTA	Female	3	65	0.171053	2	65	0.180556	0.179605	0.178655	0.177705	0.176754	0.175804
	APPIAH ISAAC	Male	2	70	0.122807	1	70	0.0972222	0.0997807	0.102339	0.104898	0.107456	0.110015
	APPIAH MOSES	Male	6	5	0.0263158	5	5	0.0347222	0.0338816	0.0330409	0.0322003	0.0313596	0.030519
402	ACQUAH PHILIP	Male
	APPIAH PRINCE KWESI	Male	2	20	0.0350877	3	10	0.0416667	0.0410088	0.0403509	0.039693	0.0390351	0.0383772
	ARKO HAGAR	Female	3	25	0.0657895	4	20	0.111111	0.106579	0.102047	0.0975146	0.0929825	0.0884503
	ARKOH GALAHAD AHINSAH	Female	2	20	0.0350877	3	20	0.0833333	0.0785088	0.0736842	0.0688596	0.0640351	0.0592105
403	ADAM HALIMATU SADIA	Female
	ARTHUR EBENEZER	Male	6	25	0.131579	4	25	0.138889	0.138158	0.137427	0.136696	0.135965	0.135234
	ARTHUR ESSUMAN JAMES	Male	6	30	0.157895	4	30	0.166667	0.165789	0.164912	0.164035	0.163158	0.162281
	ARYEETEY MESHACK	Male	4	35	0.122807	3	35	0.145833	0.143531	0.141228	0.138925	0.136623	0.13432
404	ADAMA-TETTEY MARYNSKY	Female
	ASABIRE SOPHIA	Female	4	30	0.105263	3	5	0.0208333	0.0292763	0.0377193	0.0461623	0.0546053	0.0630482
	ASAHENE EMMANUELLA	Female	4	25	0.0877193	3	15	0.0625	0.0650219	0.0675439	0.0700658	0.0725877	0.0751096
	ASAMANY CARL	Male	6	15	0.0789474	4	20	0.111111	0.107895	0.104678	0.101462	0.0982456	0.0950292
405	ADAMS AFISHETU	Female
	ASAMOAH MERCY	Female	5	25	0.109649	4	5	0.0277778	0.0359649	0.044152	0.0523392	0.0605263	0.0687135
	ASARE ERIC AGYIRI AWERE	Male	5	25	0.109649	4	10	0.0555556	0.0609649	0.0663743	0.0717836	0.077193	0.0826023
	ASHITEY MCZILL HAFIZ OKO	Male	2	30	0.0526316	3	15	0.0625	0.0615132	0.0605263	0.0595395	0.0585526	0.0575658
406	ADAMS ANASS	Male
	ASIEDU MAVIS	Female	1	10	0.00877193	2	10	0.0277778	0.0258772	0.0239766	0.022076	0.0201754	0.0182749
	ATIEMO JOSEPHINE	Female	1	60	0.0526316	2	60	0.166667	0.155263	0.14386	0.132456	0.121053	0.109649
	AWUDER WILLIAM YAO	Male	2	65	0.114035	3	65	0.270833	0.255154	0.239474	0.223794	0.208114	0.192434
407	ADARKWAH IRENE	Female
	AYER PERCY OKAI	Male	1	30	0.0263158	2	30	0.0833333	0.0776316	0.0719298	0.0662281	0.0605263	0.0548246
	AYISI BENJAMIN	Male	3	35	0.0921053	4	35	0.194444	0.184211	0.173977	0.163743	0.153509	0.143275
	AZAMETSI MIRABLE	Female	2	25	0.0438596	3	25	0.104167	0.098136	0.0921053	0.0860746	0.0800439	0.0740132
408	ADDAE PORTIA	Female
	BEDIAKO PRISCILLA ODURO	Female	4	10	0.0350877	5	10	0.0694444	0.0660088	0.0625731	0.0591374	0.0557018	0.0522661
	BELLEY BETTY	Female	1	30	0.0263158	2	30	0.0833333	0.0776316	0.0719298	0.0662281	0.0605263	0.0548246
	BOATEMAA SLYVIA	Female	2	45	0.0789474	3	45	0.1875	0.176645	0.165789	0.154934	0.144079	0.133224
409	ADDEY AUGUSTINE	Male
	BOATENG ABRAHAM AMEGAVIE	Male	2	35	0.0614035	3	35	0.145833	0.13739	0.128947	0.120504	0.112061	0.103618
	BONDZIE SAMUEL AIDOO	Male	3	65	0.171053	4	65	0.361111	0.342105	0.323099	0.304094	0.285088	0.266082
	BONI MAXWELL EDEM	Male	4	50	0.175439	5	50	0.347222	0.330044	0.312865	0.295687	0.278509	0.26133
410	ADDICO FRANCIS AWULEY	Male
	BOTCHWAY HANNAH	Female	2	30	0.0526316	3	30	0.125	0.117763	0.110526	0.103289	0.0960526	0.0888158
	BOTCHWAY JEMIMA ATSWEI	Female	3	20	0.0526316	4	20	0.111111	0.105263	0.0994152	0.0935673	0.0877193	0.0818713
	BOTCHWAY MICHAEL	Male	2	10	0.0175439	3	10	0.0416667	0.0392544	0.0368421	0.0344298	0.0320175	0.0296053
411	ADDISON EMMANUEL	Male
	BOYETEY SOLOMON BUERNOR	Male	2	15	0.0263158	3	15	0.0625	0.0588816	0.0552632	0.0516447	0.0480263	0.0444079
	BRENYAH SYLVESTER	Male	6	40	0.210526	7	40	0.388889	0.371053	0.353216	0.33538	0.317544	0.299708
	CLELAND VERA VASTU	Female	2	20	0.0350877	2	20	0.0555556	0.0535088	0.051462	0.0494152	0.0473684	0.0453216
412	ADDISON STEPHEN EBO	Male
	DADZIE ISAAC	Male	1	40	0.0350877	1	40	0.0555556	0.0535088	0.051462	0.0494152	0.0473684	0.0453216
	DAMALIE DEBORAH YAYRA	Female	1	50	0.0438596	1	50	0.0694444	0.066886	0.0643275	0.061769	0.0592105	0.056652
	DARKO MOSES	Male	6	25	0.131579	6	25	0.208333	0.200658	0.192982	0.185307	0.177632	0.169956
413	ADDO NAOMI	Female
	DARKOA DORA	Female	2	40	0.0701754	2	40	0.111111	0.107018	0.102924	0.0988304	0.0947368	0.0906433
	DENTAAH AMPOFO PATIENCE O.	Female	2	20	0.0350877	2	20	0.0555556	0.0535088	0.051462	0.0494152	0.0473684	0.0453216
	DJIDONU DANIEL KWESI	Male	2	30	0.0526316	2	30	0.0833333	0.0802632	0.077193	0.0741228	0.0710526	0.0679825
414	ADDO PATIENCE	Female
	DOE KENNEDY	Male	1	10	0.00877193	1	10	0.0138889	0.0133772	0.0128655	0.0123538	0.0118421	0.0113304
	DOKU ESTHER MAKU	Female	2	20	0.0350877	2	20	0.0555556	0.0535088	0.051462	0.0494152	0.0473684	0.0453216
	DOWUONA PRISCILLA NORKAI	Female	2	30	0.0526316	2	30	0.0833333	0.0802632	0.077193	0.0741228	0.0710526	0.0679825
415	ADDY MELIORA GENEVIEVE	Female
	DZRAMADO SANDRA	Female	2	40	0.0701754	2	40	0.111111	0.107018	0.102924	0.0988304	0.0947368	0.0906433
	DZUFLE BRIDGET	Female	5	50	0.219298	5	50	0.347222	0.33443	0.321637	0.308845	0.296053	0.28326
	EDZEOU BERNARD	Male	6	60	0.315789	6	60	0.5	0.481579	0.463158	0.444737	0.426316	0.407895
416	ADEKPUITOR PETER	Male
	ENTSIEH EVANS	Male	6	70	0.368421	6	70	0.583333	0.561842	0.540351	0.51886	0.497368	0.475877
	FOMETU GLADYS COURINE	Female	3	80	0.210526	3	80	0.333333	0.321053	0.308772	0.296491	0.284211	0.27193
	GANYO REBECCA EYRAM	Female	2	10	0.0175439	2	10	0.0277778	0.0267544	0.025731	0.0247076	0.0236842	0.0226608
417	ADEKU CALEB KOJO	Male
	GBADGO CHARLOTTE	Female	2	5	0.00877193	2	5	0.0138889	0.0133772	0.0128655	0.0123538	0.0118421	0.0113304
	GODOMEY ABRAHAM	Male	2	10	0.0175439	2	10	0.0277778	0.0267544	0.025731	0.0247076	0.0236842	0.0226608
	GYAN FELICIA	Female	2	15	0.0263158	2	15	0.0416667	0.0401316	0.0385965	0.0370614	0.0355263	0.0339912
418	ADETI CLIFFORD KWABLA	Male
	GYAN MANTEY	Male	2	20	0.0350877	2	20	0.0555556	0.0535088	0.051462	0.0494152	0.0473684	0.0453216
	GYEKYE EMMANUEL	Male	3	25	0.0657895	3	25	0.104167	0.100329	0.0964912	0.0926535	0.0888158	0.0849781
	HAGAN EDWIN EBOH	Male	2	30	0.0526316	2	30	0.0833333	0.0802632	0.077193	0.0741228	0.0710526	0.0679825
419	ADINKRAH ABIGAIL	Female
	HAMMOND NATHANIEL	Male	5	35	0.153509	5	35	0.243056	0.234101	0.225146	0.216192	0.207237	0.198282
	IBRAHIM MOHAMMED SANUSI	Male	3	40	0.105263	3	40	0.166667	0.160526	0.154386	0.148246	0.142105	0.135965
	IBRAHIM SEMIRATU	Female	5	45	0.197368	5	45	0.3125	0.300987	0.289474	0.277961	0.266447	0.254934
420	ADIOK JOSHUA ALLEN	Male
	INUSAH MOHAMMED	Male	3	50	0.131579	3	50	0.208333	0.200658	0.192982	0.185307	0.177632	0.169956
	KABAH ALIAYIRE ALEX	Male	4	55	0.192982	4	55	0.305556	0.294298	0.283041	0.271784	0.260526	0.249269
	KELVIN NKANSAH	Male	3	60	0.157895	3	60	0.25	0.240789	0.231579	0.222368	0.213158	0.203947
421	ADJAKLOE FLOSSIE DZIFA	Female
	KUDJUH BRIGHT DOSU	Male	2	65	0.114035	2	65	0.180556	0.173904	0.167251	0.160599	0.153947	0.147295
	KUMI DANIEL DARKO	Male	1	70	0.0614035	1	70	0.0972222	0.0936404	0.0900585	0.0864766	0.0828947	0.0793129
	KUMI MARY POKUAA	Female	2	5	0.00877193	2	5	0.0138889	0.0133772	0.0128655	0.0123538	0.0118421	0.0113304
422	ADJASOO LINDA SELINAM	Female
	KUSI LYDIA ADJOA ADJEIWAA	Female	4	10	0.0350877	4	10	0.0555556	0.0535088	0.051462	0.0494152	0.0473684	0.0453216
	KWARTENG JESSE SARPONG	Male	5	20	0.0877193	5	20	0.138889	0.133772	0.128655	0.123538	0.118421	0.113304
	LANTEI- LAMPTEY JESSE NII	Male	2	20	0.0350877	2	20	0.0555556	0.0535088	0.051462	0.0494152	0.0473684	0.0453216
423	ADJEI - BAAH STEPHEN	Male
	MASOPEH FELICIA VANILLA NAA AMELEY	Female	4	25	0.0877193	4	25	0.138889	0.133772	0.128655	0.123538	0.118421	0.113304
	MENDS FIDELIA APPIAH	Female	3	30	0.0789474	3	30	0.125	0.120395	0.115789	0.111184	0.106579	0.101974
	MENSAH BETTY TELUS	Female	2	35	0.0614035	2	35	0.0972222	0.0936404	0.0900585	0.0864766	0.0828947	0.0793129
424	ADJEI BELINDA ADJETEY	Female
	MENSAH CHARLES GYAMFI	Male	2	5	0.00877193	2	6	0.0166667	0.0158772	0.0150877	0.0142982	0.0135088	0.0127193
	MENSAH PHILOMINA TECHIE	Female	3	10	0.0263158	3	12	0.05	0.0476316	0.0452632	0.0428947	0.0405263	0.0381579
	MENYE GODWIN JR	Male	3	20	0.0526316	3	18	0.075	0.0727632	0.0705263	0.0682895	0.0660526	0.0638158
425	ADJEI DANIEL	Male
	MOHAMMED ADAM ZAKIYU	Male	3	25	0.0657895	3	24	0.1	0.0965789	0.0931579	0.0897368	0.0863158	0.0828947
	NARTEH GEOFFREY	Male	2	30	0.0526316	2	27	0.075	0.0727632	0.0705263	0.0682895	0.0660526	0.0638158
	NKANSAH LOCTUS ADJEI	Female	1	30	0.0263158	1	30	0.0416667	0.0401316	0.0385965	0.0370614	0.0355263	0.0339912
426	ADJEI HENRY	Male
	NORTEY NICHOLAS	Male	5	10	0.0438596	5	10	0.0694444	0.066886	0.0643275	0.061769	0.0592105	0.056652
	NUAMAH SAMUEL	Male	2	60	0.105263	2	60	0.166667	0.160526	0.154386	0.148246	0.142105	0.135965
	NUKPE DAVID CONVERY	Male	7	65	0.399123	7	65	0.631944	0.608662	0.58538	0.562098	0.538816	0.515534
427	ADJEI JENNIFER ODUA	Female
	NYARKO ANISA	Female	2	30	0.0526316	2	30	0.0833333	0.0802632	0.077193	0.0741228	0.0710526	0.0679825
	NYARKO NICHOLAS	Male	2	35	0.0614035	2	35	0.0972222	0.0936404	0.0900585	0.0864766	0.0828947	0.0793129
	NYARKO WILLIAM KWABENA	Male	1	25	0.0219298	1	25	0.0347222	0.033443	0.0321637	0.0308845	0.0296053	0.028326
428	ADJEIBEA RACHEAL	Female
	NYEDU ISHMAEL	Male	4	10	0.0350877	4	10	0.0555556	0.0535088	0.051462	0.0494152	0.0473684	0.0453216
	OBENG JULIANA	Female	3	30	0.0789474	3	30	0.125	0.120395	0.115789	0.111184	0.106579	0.101974
	OBUOBI SOLOMON	Male	3	45	0.118421	3	45	0.1875	0.180592	0.173684	0.166776	0.159868	0.152961
429	ADJETEY ERAMI NII ADJEI	Male
	ODOI ERIC AKO	Male	5	35	0.153509	5	35	0.243056	0.234101	0.225146	0.216192	0.207237	0.198282
	OFFEI OSEI FRANCIS	Male	4	65	0.22807	4	65	0.361111	0.347807	0.334503	0.321199	0.307895	0.294591
	OPOKU SAMUEL	Male	2	50	0.0877193	2	50	0.138889	0.133772	0.128655	0.123538	0.118421	0.113304
430	ADJIN-TETTEY JEREMIAH	Male
	OPOKUA GIFTY NANA AMA	Female	2	30	0.0526316	2	30	0.0833333	0.0802632	0.077193	0.0741228	0.0710526	0.0679825
	OSEI RICHMOND KOFI	Male	3	20	0.0526316	3	20	0.0833333	0.0802632	0.077193	0.0741228	0.0710526	0.0679825
	OUEDORAOGO ROGER PETER	Male	6	10	0.0526316	6	10	0.0833333	0.0802632	0.077193	0.0741228	0.0710526	0.0679825
431	ADJOKATSE BERNICE	Female
	OWUSU ALEX	Male	4	15	0.0526316	4	15	0.0833333	0.0802632	0.077193	0.0741228	0.0710526	0.0679825
	OWUSU-APENTENG STEPHEN	Male	3	40	0.105263	3	40	0.166667	0.160526	0.154386	0.148246	0.142105	0.135965
	PARRY JESSICA	Male	2	20	0.0350877	2	20	0.0555556	0.0535088	0.051462	0.0494152	0.0473684	0.0453216
432	ADOM JENNIFER ESTHER OHENEBA	Female
	QUAICOE ENOCH	Male	2	40	0.0701754	2	40	0.111111	0.107018	0.102924	0.0988304	0.0947368	0.0906433
	QUANSAH BELINDA	Female	3	50	0.131579	3	50	0.208333	0.200658	0.192982	0.185307	0.177632	0.169956
	QUARTEY EVELYN NAA KWARLEY	Female	7	25	0.153509	7	25	0.243056	0.234101	0.225146	0.216192	0.207237	0.198282
433	ADOM KWADWO BOAKYE	Male
	QUARTEY SALOMEY	Female	2	40	0.0701754	2	40	0.111111	0.107018	0.102924	0.0988304	0.0947368	0.0906433
	SAHEED AZEEZAT	Female	2	20	0.0350877	2	20	0.0555556	0.0535088	0.051462	0.0494152	0.0473684	0.0453216
	SHAIBU FAUZIYATU	Female	2	30	0.0526316	2	30	0.0833333	0.0802632	0.077193	0.0741228	0.0710526	0.0679825
434	ADU BONA SUSANNA	Female
	SOWAH ALEXANDRA ENYONAM	Female	4	10	0.0350877	4	10	0.0555556	0.0535088	0.051462	0.0494152	0.0473684	0.0453216
	SULLEY HINDU MUNIRU	Female	3	20	0.0526316	3	20	0.0833333	0.0802632	0.077193	0.0741228	0.0710526	0.0679825
	TAGOE DAVID	Male	4	30	0.105263	4	30	0.166667	0.160526	0.154386	0.148246	0.142105	0.135965
435	ADU DORA	Female
	TAWIAH ADAMA OKOE	Male	2	40	0.0701754	2	40	0.111111	0.107018	0.102924	0.0988304	0.0947368	0.0906433
	TETTEH KELVIN	Male	3	50	0.131579	3	50	0.208333	0.200658	0.192982	0.185307	0.177632	0.169956
	TETTEH MALVIN	Male	4	60	0.210526	4	60	0.333333	0.321053	0.308772	0.296491	0.284211	0.27193
436	ADU PRISCILLA NKETIA	Female
	WADIE LINDA NKANSAH	Female	5	70	0.307018	5	70	0.486111	0.468202	0.450292	0.432383	0.414474	0.396564
	WENOMA LINDA	Female	3	80	0.210526	3	80	0.333333	0.321053	0.308772	0.296491	0.284211	0.27193
	YARTEY SEFIATU	Female	2	10	0.0175439	2	10	0.0277778	0.0267544	0.025731	0.0247076	0.0236842	0.0226608
437	ADU-AGYEI AWURA AKUA	Female
	OWUSU ALEX	Male	2	5	0.00877193	2	5	0.0138889	0.0133772	0.0128655	0.0123538	0.0118421	0.0113304
	OWUSU-APENTENG STEPHEN	Male	2	10	0.0175439	2	10	0.0277778	0.0267544	0.025731	0.0247076	0.0236842	0.0226608
	PARRY JESSICA	Male	3	15	0.0394737	3	15	0.0625	0.0601974	0.0578947	0.0555921	0.0532895	0.0509868
438	ADU-TWUM FREDERICK ASANTE	Male
	QUAICOE ENOCH	Male	2	20	0.0350877	2	20	0.0555556	0.0535088	0.051462	0.0494152	0.0473684	0.0453216
	QUANSAH BELINDA	Female	2	25	0.0438596	2	25	0.0694444	0.066886	0.0643275	0.061769	0.0592105	0.056652
	QUARTEY EVELYN NAA KWARLEY	Female	3	30	0.0789474	3	30	0.125	0.120395	0.115789	0.111184	0.106579	0.101974
439	ADUSEI GIFTY YEBOAH	Female
	QUARTEY SALOMEY	Female	2	35	0.0614035	2	35	0.0972222	0.0936404	0.0900585	0.0864766	0.0828947	0.0793129
	SAHEED AZEEZAT	Female	3	40	0.105263	3	40	0.166667	0.160526	0.154386	0.148246	0.142105	0.135965
	SHAIBU FAUZIYATU	Female	2	45	0.0789474	2	45	0.125	0.120395	0.115789	0.111184	0.106579	0.101974
440	ADUUM REBECCA	Female
	AFARI STEPHEN	Male	2	50	0.0877193	2	50	0.138889	0.133772	0.128655	0.123538	0.118421	0.113304
	AFOTEY PATRICK DUNYO	Male	3	55	0.144737	3	55	0.229167	0.220724	0.212281	0.203838	0.195395	0.186952
	AFRAH TRACY NTOW	Female	2	60	0.105263	2	60	0.166667	0.160526	0.154386	0.148246	0.142105	0.135965
441	ABABIO ABEDNEGO A.	Male
	ABOAGYE ELIZABETH BOADIWAA	Female	7	10	0.0614035	6	10	0.0833333	0.0811404	0.0789474	0.0767544	0.0745614	0.0723684
	ABOE ANDREWS	Male	5	60	0.263158	4	60	0.333333	0.326316	0.319298	0.312281	0.305263	0.298246
	ABRAHAM-QUANSAH MARY EVA	Female	4	65	0.22807	3	65	0.270833	0.266557	0.262281	0.258004	0.253728	0.249452
442	ABALEM JENNIFER	Female
	ADDAE SANDRA	Female	4	30	0.105263	1	30	0.0416667	0.0480263	0.054386	0.0607456	0.0671053	0.0734649
	ADJEI FREDERICK YAW	Male	5	35	0.153509	2	35	0.0972222	0.102851	0.10848	0.114108	0.119737	0.125365
	ADJEI PRINCE BAFFOUR	Male	6	25	0.131579	1	25	0.0347222	0.0444079	0.0540936	0.0637792	0.0734649	0.0831506
443	ABBAN VIDA OWUSU	Female
	ADJEI SAMUEL	Male	7	50	0.307018	2	10	0.0277778	0.0557018	0.0836257	0.11155	0.139474	0.167398
	ADJORLOLO MERCY NORKPLIM	Female	4	30	0.105263	3	30	0.125	0.123026	0.121053	0.119079	0.117105	0.115132
	ADOCTOR VICTORIA	Female	5	45	0.197368	4	45	0.25	0.244737	0.239474	0.234211	0.228947	0.223684
444	ADU AFRIYIE	Male
	ADU EMMANUEL	Male	7	35	0.214912	6	35	0.291667	0.283991	0.276316	0.26864	0.260965	0.253289
	ADZOWU MILLICENT	Female	1	10	0.00877193	2	65	0.180556	0.163377	0.146199	0.12902	0.111842	0.0946637
	AFORDE JAMES ABLORDE	Male	2	50	0.0877193	2	50	0.138889	0.133772	0.128655	0.123538	0.118421	0.113304
445	ABDALLAH FATIMATU	Female
	AGBENYEGA STEPHEN	Male	4	30	0.105263	3	30	0.125	0.123026	0.121053	0.119079	0.117105	0.115132
	AGBOGBA LANDRY KWAME	Male	5	20	0.0877193	4	20	0.111111	0.108772	0.106433	0.104094	0.101754	0.0994152
	AGGERH BARNABAS KOBBY	Male	6	10	0.0526316	5	10	0.0694444	0.0677632	0.0660819	0.0644006	0.0627193	0.061038
446	ABDULAI FAIZA	Female
	AGOE JEHOSHAPHAT SOWAH	Male	2	15	0.0263158	1	15	0.0208333	0.0213816	0.0219298	0.0224781	0.0230263	0.0235746
	AGUDA NARKIE PATRICIA	Female	3	40	0.105263	2	40	0.111111	0.110526	0.109942	0.109357	0.108772	0.108187
	AGYARE PRISCILLA DARFOUR	Female	2	20	0.0350877	1	20	0.0277778	0.0285088	0.0292398	0.0299708	0.0307018	0.0314327
447	ABEKAH EMMANUEL	Male
	AGYEI RICHARD KWAME	Male	4	40	0.140351	1	40	0.0555556	0.0640351	0.0725146	0.0809942	0.0894737	0.0979532
	AGYEMAN DUAH BOATEMAA	Female	4	50	0.175439	2	50	0.138889	0.142544	0.146199	0.149854	0.153509	0.157164
	AGYEMAN PAUL BOAKYE	Male	3	25	0.0657895	1	25	0.0347222	0.0378289	0.0409357	0.0440424	0.0471491	0.0502558
448	ABOAGYE DAVID ADU	Male
	AGYIRI GEORGINA	Female	3	40	0.105263	1	40	0.0555556	0.0605263	0.0654971	0.0704678	0.0754386	0.0804094
	AHIABLEY PORTIA	Female	4	20	0.0701754	2	20	0.0555556	0.0570175	0.0584795	0.0599415	0.0614035	0.0628655
	AHONI MAUDLIN AYONGO	Female	4	30	0.105263	2	30	0.0833333	0.0855263	0.0877193	0.0899123	0.0921053	0.0942982
449	ABOAGYE FELIX	Male
	AKAGBO REBECCA	Female	4	30	0.105263	1	10	0.0138889	0.0230263	0.0321637	0.0413012	0.0504386	0.059576
	AKOTO REINDOLF APPIAH	Male	2	20	0.0350877	4	20	0.111111	0.103509	0.0959064	0.0883041	0.0807018	0.0730994
	AKUFFO GIDEON	Male	1	30	0.0263158	1	30	0.0416667	0.0401316	0.0385965	0.0370614	0.0355263	0.0339912
450	ABU ABDUL MANAF	Male
	ALAGBO EMMANUEL	Male	3	40	0.105263	2	40	0.111111	0.110526	0.109942	0.109357	0.108772	0.108187
	ALLOTEY KPAKPO VINCENT	Male	2	50	0.0877193	1	50	0.0694444	0.0712719	0.0730994	0.0749269	0.0767544	0.0785819
	ALLOTEY PEARL NAA AKU	Female	2	60	0.105263	1	60	0.0833333	0.0855263	0.0877193	0.0899123	0.0921053	0.0942982
451	ABUBAKAR ARAFAT SUFYAN	Male
	AMAKYE JAMES SARPONG	Male	7	70	0.429825	6	70	0.583333	0.567982	0.552632	0.537281	0.52193	0.506579
	AMEVOR ERIC	Male	5	80	0.350877	4	80	0.444444	0.435088	0.425731	0.416374	0.407018	0.397661
	AMOAH CHARLOTTE KORKOR	Female	4	10	0.0350877	3	10	0.0416667	0.0410088	0.0403509	0.039693	0.0390351	0.0383772
452	ACHEAMPONG CHRISTABEL	Female
	AMOAH MILDRED	Female	4	5	0.0175439	3	5	0.0208333	0.0205044	0.0201754	0.0198465	0.0195175	0.0191886
	AMOAKO ERNESTINA OPOKUA	Female	2	10	0.0175439	1	10	0.0138889	0.0142544	0.0146199	0.0149854	0.0153509	0.0157164
	AMPONSAH CECILIA ABENA	Female	1	15	0.0131579	1	15	0.0208333	0.0200658	0.0192982	0.0185307	0.0177632	0.0169956
453	ACHEAMPONG KINGSLEY	Male
	AMUZU STELLA KABUKI	Female	5	20	0.0877193	4	20	0.111111	0.108772	0.106433	0.104094	0.101754	0.0994152
	ANABI MUSAH AHMED	Male	6	25	0.131579	5	25	0.173611	0.169408	0.165205	0.161001	0.156798	0.152595
	ANDERSON GIFTY	Female	2	30	0.0526316	1	30	0.0416667	0.0427632	0.0438596	0.0449561	0.0460526	0.0471491
454	ACHEAMPONG MICHAEL APPIAH	Male
	ANDERSON VIVIAN	Female	3	35	0.0921053	2	35	0.0972222	0.0967105	0.0961988	0.0956871	0.0951754	0.0946637
	ANKOMAH GEORGINA	Female	3	40	0.105263	2	40	0.111111	0.110526	0.109942	0.109357	0.108772	0.108187
	ANNANG FRANCISCA TORSHIE	Female	2	45	0.0789474	1	45	0.0625	0.0641447	0.0657895	0.0674342	0.0690789	0.0707237
455	ACQUAH BENJAMIN	Male
	ANNOR RICHAEL	Female	2	50	0.0877193	1	50	0.0694444	0.0712719	0.0730994	0.0749269	0.0767544	0.0785819
	ANSAH FAUSTINA	Female	3	55	0.144737	2	55	0.152778	0.151974	0.15117	0.150365	0.149561	0.148757
	ANSAH MARFO DOREEN	Female	2	60	0.105263	1	60	0.0833333	0.0855263	0.0877193	0.0899123	0.0921053	0.0942982
456	ACQUAH KINGSLEY OCANSEY	Male
	ANTHONIO HENRIETTA	Female	3	65	0.171053	2	65	0.180556	0.179605	0.178655	0.177705	0.176754	0.175804
	APPIAH ISAAC	Male	2	70	0.122807	1	70	0.0972222	0.0997807	0.102339	0.104898	0.107456	0.110015
	APPIAH MOSES	Male	6	5	0.0263158	5	5	0.0347222	0.0338816	0.0330409	0.0322003	0.0313596	0.030519
457	ACQUAH PHILIP	Male
	APPIAH PRINCE KWESI	Male	2	20	0.0350877	3	10	0.0416667	0.0410088	0.0403509	0.039693	0.0390351	0.0383772
	ARKO HAGAR	Female	3	25	0.0657895	4	20	0.111111	0.106579	0.102047	0.0975146	0.0929825	0.0884503
	ARKOH GALAHAD AHINSAH	Female	2	20	0.0350877	3	20	0.0833333	0.0785088	0.0736842	0.0688596	0.0640351	0.0592105
458	ADAM HALIMATU SADIA	Female
	ARTHUR EBENEZER	Male	6	25	0.131579	4	25	0.138889	0.138158	0.137427	0.136696	0.135965	0.135234
	ARTHUR ESSUMAN JAMES	Male	6	30	0.157895	4	30	0.166667	0.165789	0.164912	0.164035	0.163158	0.162281
	ARYEETEY MESHACK	Male	4	35	0.122807	3	35	0.145833	0.143531	0.141228	0.138925	0.136623	0.13432
459	ADAMA-TETTEY MARYNSKY	Female
	ASABIRE SOPHIA	Female	4	30	0.105263	3	10	0.0416667	0.0480263	0.054386	0.0607456	0.0671053	0.0734649
	ASAHENE EMMANUELLA	Female	4	25	0.0877193	3	20	0.0833333	0.0837719	0.0842105	0.0846491	0.0850877	0.0855263
	ASAMANY CARL	Male	6	15	0.0789474	4	30	0.166667	0.157895	0.149123	0.140351	0.131579	0.122807
460	ADAMS AFISHETU	Female
	ASAMOAH MERCY	Female	5	25	0.109649	4	5	0.0277778	0.0359649	0.044152	0.0523392	0.0605263	0.0687135
	ASARE ERIC AGYIRI AWERE	Male	5	30	0.131579	4	10	0.0555556	0.0631579	0.0707602	0.0783626	0.0859649	0.0935673
	ASHITEY MCZILL HAFIZ OKO	Male	2	30	0.0526316	3	15	0.0625	0.0615132	0.0605263	0.0595395	0.0585526	0.0575658
461	ADAMS ANASS	Male
	ASIEDU MAVIS	Female	1	10	0.00877193	2	10	0.0277778	0.0258772	0.0239766	0.022076	0.0201754	0.0182749
	ATIEMO JOSEPHINE	Female	1	60	0.0526316	2	60	0.166667	0.155263	0.14386	0.132456	0.121053	0.109649
	AWUDER WILLIAM YAO	Male	2	65	0.114035	3	65	0.270833	0.255154	0.239474	0.223794	0.208114	0.192434
462	ADARKWAH IRENE	Female
	AYER PERCY OKAI	Male	1	30	0.0263158	2	30	0.0833333	0.0776316	0.0719298	0.0662281	0.0605263	0.0548246
	AYISI BENJAMIN	Male	3	35	0.0921053	4	35	0.194444	0.184211	0.173977	0.163743	0.153509	0.143275
	AZAMETSI MIRABLE	Female	2	25	0.0438596	3	25	0.104167	0.098136	0.0921053	0.0860746	0.0800439	0.0740132
463	ADDAE PORTIA	Female
	BEDIAKO PRISCILLA ODURO	Female	4	10	0.0350877	5	10	0.0694444	0.0660088	0.0625731	0.0591374	0.0557018	0.0522661
	BELLEY BETTY	Female	1	30	0.0263158	2	30	0.0833333	0.0776316	0.0719298	0.0662281	0.0605263	0.0548246
	BOATEMAA SLYVIA	Female	2	45	0.0789474	3	45	0.1875	0.176645	0.165789	0.154934	0.144079	0.133224
464	ADDEY AUGUSTINE	Male
	BOATENG ABRAHAM AMEGAVIE	Male	2	35	0.0614035	3	35	0.145833	0.13739	0.128947	0.120504	0.112061	0.103618
	BONDZIE SAMUEL AIDOO	Male	3	65	0.171053	4	65	0.361111	0.342105	0.323099	0.304094	0.285088	0.266082
	BONI MAXWELL EDEM	Male	4	50	0.175439	5	50	0.347222	0.330044	0.312865	0.295687	0.278509	0.26133
465	ADDICO FRANCIS AWULEY	Male
	BOTCHWAY HANNAH	Female	2	30	0.0526316	3	30	0.125	0.117763	0.110526	0.103289	0.0960526	0.0888158
	BOTCHWAY JEMIMA ATSWEI	Female	3	20	0.0526316	4	20	0.111111	0.105263	0.0994152	0.0935673	0.0877193	0.0818713
	BOTCHWAY MICHAEL	Male	2	10	0.0175439	3	10	0.0416667	0.0392544	0.0368421	0.0344298	0.0320175	0.0296053
466	ADDISON EMMANUEL	Male
	BOYETEY SOLOMON BUERNOR	Male	2	15	0.0263158	3	15	0.0625	0.0588816	0.0552632	0.0516447	0.0480263	0.0444079
	BRENYAH SYLVESTER	Male	6	40	0.210526	7	40	0.388889	0.371053	0.353216	0.33538	0.317544	0.299708
	CLELAND VERA VASTU	Female	2	20	0.0350877	2	20	0.0555556	0.0535088	0.051462	0.0494152	0.0473684	0.0453216
467	ADDISON STEPHEN EBO	Male
	DADZIE ISAAC	Male	1	40	0.0350877	1	40	0.0555556	0.0535088	0.051462	0.0494152	0.0473684	0.0453216
	DAMALIE DEBORAH YAYRA	Female	1	50	0.0438596	1	50	0.0694444	0.066886	0.0643275	0.061769	0.0592105	0.056652
	DARKO MOSES	Male	6	25	0.131579	6	25	0.208333	0.200658	0.192982	0.185307	0.177632	0.169956
468	ADDO NAOMI	Female
	DARKOA DORA	Female	2	40	0.0701754	2	40	0.111111	0.107018	0.102924	0.0988304	0.0947368	0.0906433
	DENTAAH AMPOFO PATIENCE O.	Female	2	20	0.0350877	2	20	0.0555556	0.0535088	0.051462	0.0494152	0.0473684	0.0453216
	DJIDONU DANIEL KWESI	Male	2	30	0.0526316	2	30	0.0833333	0.0802632	0.077193	0.0741228	0.0710526	0.0679825
469	ADDO PATIENCE	Female
	DOE KENNEDY	Male	1	10	0.00877193	1	10	0.0138889	0.0133772	0.0128655	0.0123538	0.0118421	0.0113304
	DOKU ESTHER MAKU	Female	2	20	0.0350877	2	20	0.0555556	0.0535088	0.051462	0.0494152	0.0473684	0.0453216
	DOWUONA PRISCILLA NORKAI	Female	2	30	0.0526316	2	30	0.0833333	0.0802632	0.077193	0.0741228	0.0710526	0.0679825
470	ADDY MELIORA GENEVIEVE	Female
	DZRAMADO SANDRA	Female	2	40	0.0701754	2	40	0.111111	0.107018	0.102924	0.0988304	0.0947368	0.0906433
	DZUFLE BRIDGET	Female	5	50	0.219298	5	50	0.347222	0.33443	0.321637	0.308845	0.296053	0.28326
	EDZEOU BERNARD	Male	6	60	0.315789	6	60	0.5	0.481579	0.463158	0.444737	0.426316	0.407895
471	ADEKPUITOR PETER	Male
	ENTSIEH EVANS	Male	6	70	0.368421	6	70	0.583333	0.561842	0.540351	0.51886	0.497368	0.475877
	FOMETU GLADYS COURINE	Female	3	80	0.210526	3	80	0.333333	0.321053	0.308772	0.296491	0.284211	0.27193
	GANYO REBECCA EYRAM	Female	2	10	0.0175439	2	10	0.0277778	0.0267544	0.025731	0.0247076	0.0236842	0.0226608
472	ADEKU CALEB KOJO	Male
	GBADGO CHARLOTTE	Female	2	5	0.00877193	2	5	0.0138889	0.0133772	0.0128655	0.0123538	0.0118421	0.0113304
	GODOMEY ABRAHAM	Male	2	10	0.0175439	2	10	0.0277778	0.0267544	0.025731	0.0247076	0.0236842	0.0226608
	GYAN FELICIA	Female	2	15	0.0263158	2	15	0.0416667	0.0401316	0.0385965	0.0370614	0.0355263	0.0339912
473	ADETI CLIFFORD KWABLA	Male
	GYAN MANTEY	Male	2	20	0.0350877	2	20	0.0555556	0.0535088	0.051462	0.0494152	0.0473684	0.0453216
	GYEKYE EMMANUEL	Male	3	25	0.0657895	3	25	0.104167	0.100329	0.0964912	0.0926535	0.0888158	0.0849781
	HAGAN EDWIN EBOH	Male	2	30	0.0526316	2	30	0.0833333	0.0802632	0.077193	0.0741228	0.0710526	0.0679825
474	ADINKRAH ABIGAIL	Female
	HAMMOND NATHANIEL	Male	5	35	0.153509	5	35	0.243056	0.234101	0.225146	0.216192	0.207237	0.198282
	IBRAHIM MOHAMMED SANUSI	Male	3	40	0.105263	3	40	0.166667	0.160526	0.154386	0.148246	0.142105	0.135965
	IBRAHIM SEMIRATU	Female	5	45	0.197368	5	45	0.3125	0.300987	0.289474	0.277961	0.266447	0.254934
475	ADIOK JOSHUA ALLEN	Male
	INUSAH MOHAMMED	Male	3	50	0.131579	3	50	0.208333	0.200658	0.192982	0.185307	0.177632	0.169956
	KABAH ALIAYIRE ALEX	Male	4	55	0.192982	4	55	0.305556	0.294298	0.283041	0.271784	0.260526	0.249269
	KELVIN NKANSAH	Male	3	60	0.157895	3	60	0.25	0.240789	0.231579	0.222368	0.213158	0.203947
476	ADJAKLOE FLOSSIE DZIFA	Female
	KUDJUH BRIGHT DOSU	Male	2	65	0.114035	2	65	0.180556	0.173904	0.167251	0.160599	0.153947	0.147295
	KUMI DANIEL DARKO	Male	1	70	0.0614035	1	70	0.0972222	0.0936404	0.0900585	0.0864766	0.0828947	0.0793129
	KUMI MARY POKUAA	Female	2	5	0.00877193	2	5	0.0138889	0.0133772	0.0128655	0.0123538	0.0118421	0.0113304
477	ADJASOO LINDA SELINAM	Female
	KUSI LYDIA ADJOA ADJEIWAA	Female	4	10	0.0350877	4	10	0.0555556	0.0535088	0.051462	0.0494152	0.0473684	0.0453216
	KWARTENG JESSE SARPONG	Male	5	20	0.0877193	5	20	0.138889	0.133772	0.128655	0.123538	0.118421	0.113304
	LANTEI- LAMPTEY JESSE NII	Male	2	20	0.0350877	2	20	0.0555556	0.0535088	0.051462	0.0494152	0.0473684	0.0453216
478	ADJEI - BAAH STEPHEN	Male
	MASOPEH FELICIA VANILLA NAA AMELEY	Female	4	25	0.0877193	4	25	0.138889	0.133772	0.128655	0.123538	0.118421	0.113304
	MENDS FIDELIA APPIAH	Female	3	30	0.0789474	3	30	0.125	0.120395	0.115789	0.111184	0.106579	0.101974
	MENSAH BETTY TELUS	Female	2	35	0.0614035	2	35	0.0972222	0.0936404	0.0900585	0.0864766	0.0828947	0.0793129
479	ADJEI BELINDA ADJETEY	Female
	MENSAH CHARLES GYAMFI	Male	2	5	0.00877193	2	6	0.0166667	0.0158772	0.0150877	0.0142982	0.0135088	0.0127193
	MENSAH PHILOMINA TECHIE	Female	3	10	0.0263158	3	12	0.05	0.0476316	0.0452632	0.0428947	0.0405263	0.0381579
	MENYE GODWIN JR	Male	3	15	0.0394737	3	18	0.075	0.0714474	0.0678947	0.0643421	0.0607895	0.0572368
480	ADJEI DANIEL	Male
	MOHAMMED ADAM ZAKIYU	Male	3	30	0.0789474	3	24	0.1	0.0978947	0.0957895	0.0936842	0.0915789	0.0894737
	NARTEH GEOFFREY	Male	2	35	0.0614035	2	27	0.075	0.0736404	0.0722807	0.0709211	0.0695614	0.0682018
	NKANSAH LOCTUS ADJEI	Female	1	30	0.0263158	1	30	0.0416667	0.0401316	0.0385965	0.0370614	0.0355263	0.0339912
481	ADJEI HENRY	Male
	NORTEY NICHOLAS	Male	5	10	0.0438596	5	10	0.0694444	0.066886	0.0643275	0.061769	0.0592105	0.056652
	NUAMAH SAMUEL	Male	2	60	0.105263	2	60	0.166667	0.160526	0.154386	0.148246	0.142105	0.135965
	NUKPE DAVID CONVERY	Male	7	65	0.399123	7	65	0.631944	0.608662	0.58538	0.562098	0.538816	0.515534
482	ADJEI JENNIFER ODUA	Female
	NYARKO ANISA	Female	2	30	0.0526316	2	30	0.0833333	0.0802632	0.077193	0.0741228	0.0710526	0.0679825
	NYARKO NICHOLAS	Male	2	35	0.0614035	2	35	0.0972222	0.0936404	0.0900585	0.0864766	0.0828947	0.0793129
	NYARKO WILLIAM KWABENA	Male	1	25	0.0219298	1	25	0.0347222	0.033443	0.0321637	0.0308845	0.0296053	0.028326
483	ADJEIBEA RACHEAL	Female
	NYEDU ISHMAEL	Male	4	10	0.0350877	4	10	0.0555556	0.0535088	0.051462	0.0494152	0.0473684	0.0453216
	OBENG JULIANA	Female	3	30	0.0789474	3	30	0.125	0.120395	0.115789	0.111184	0.106579	0.101974
	OBUOBI SOLOMON	Male	3	45	0.118421	3	45	0.1875	0.180592	0.173684	0.166776	0.159868	0.152961
484	ADJETEY ERAMI NII ADJEI	Male
	ODOI ERIC AKO	Male	5	35	0.153509	5	35	0.243056	0.234101	0.225146	0.216192	0.207237	0.198282
	OFFEI OSEI FRANCIS	Male	4	65	0.22807	4	65	0.361111	0.347807	0.334503	0.321199	0.307895	0.294591
	OPOKU SAMUEL	Male	2	50	0.0877193	2	50	0.138889	0.133772	0.128655	0.123538	0.118421	0.113304
485	ADJIN-TETTEY JEREMIAH	Male
	OPOKUA GIFTY NANA AMA	Female	2	30	0.0526316	2	30	0.0833333	0.0802632	0.077193	0.0741228	0.0710526	0.0679825
	OSEI RICHMOND KOFI	Male	3	20	0.0526316	3	20	0.0833333	0.0802632	0.077193	0.0741228	0.0710526	0.0679825
	OUEDORAOGO ROGER PETER	Male	6	10	0.0526316	6	10	0.0833333	0.0802632	0.077193	0.0741228	0.0710526	0.0679825
486	ADJOKATSE BERNICE	Female
	OWUSU ALEX	Male	4	15	0.0526316	4	15	0.0833333	0.0802632	0.077193	0.0741228	0.0710526	0.0679825
	OWUSU-APENTENG STEPHEN	Male	3	40	0.105263	3	40	0.166667	0.160526	0.154386	0.148246	0.142105	0.135965
	PARRY JESSICA	Male	2	20	0.0350877	2	20	0.0555556	0.0535088	0.051462	0.0494152	0.0473684	0.0453216
487	ADOM JENNIFER ESTHER OHENEBA	Female
	QUAICOE ENOCH	Male	2	40	0.0701754	2	40	0.111111	0.107018	0.102924	0.0988304	0.0947368	0.0906433
	QUANSAH BELINDA	Female	3	50	0.131579	3	50	0.208333	0.200658	0.192982	0.185307	0.177632	0.169956
	QUARTEY EVELYN NAA KWARLEY	Female	7	25	0.153509	7	25	0.243056	0.234101	0.225146	0.216192	0.207237	0.198282
488	ADOM KWADWO BOAKYE	Male
	QUARTEY SALOMEY	Female	2	40	0.0701754	2	40	0.111111	0.107018	0.102924	0.0988304	0.0947368	0.0906433
	SAHEED AZEEZAT	Female	2	20	0.0350877	2	20	0.0555556	0.0535088	0.051462	0.0494152	0.0473684	0.0453216
	SHAIBU FAUZIYATU	Female	2	30	0.0526316	2	30	0.0833333	0.0802632	0.077193	0.0741228	0.0710526	0.0679825
489	ADU BONA SUSANNA	Female
	SOWAH ALEXANDRA ENYONAM	Female	4	10	0.0350877	4	10	0.0555556	0.0535088	0.051462	0.0494152	0.0473684	0.0453216
	SULLEY HINDU MUNIRU	Female	3	20	0.0526316	3	20	0.0833333	0.0802632	0.077193	0.0741228	0.0710526	0.0679825
	TAGOE DAVID	Male	4	30	0.105263	4	30	0.166667	0.160526	0.154386	0.148246	0.142105	0.135965
490	ADU DORA	Female
	TAWIAH ADAMA OKOE	Male	2	40	0.0701754	2	40	0.111111	0.107018	0.102924	0.0988304	0.0947368	0.0906433
	TETTEH KELVIN	Male	3	50	0.131579	3	50	0.208333	0.200658	0.192982	0.185307	0.177632	0.169956
	TETTEH MALVIN	Male	4	60	0.210526	4	60	0.333333	0.321053	0.308772	0.296491	0.284211	0.27193
491	ADU PRISCILLA NKETIA	Female
	WADIE LINDA NKANSAH	Female	5	70	0.307018	5	70	0.486111	0.468202	0.450292	0.432383	0.414474	0.396564
	WENOMA LINDA	Female	3	80	0.210526	3	80	0.333333	0.321053	0.308772	0.296491	0.284211	0.27193
	YARTEY SEFIATU	Female	2	10	0.0175439	2	10	0.0277778	0.0267544	0.025731	0.0247076	0.0236842	0.0226608
492	ADU-AGYEI AWURA AKUA	Female
	OWUSU ALEX	Male	2	5	0.00877193	2	5	0.0138889	0.0133772	0.0128655	0.0123538	0.0118421	0.0113304
	OWUSU-APENTENG STEPHEN	Male	2	10	0.0175439	2	10	0.0277778	0.0267544	0.025731	0.0247076	0.0236842	0.0226608
	PARRY JESSICA	Male	3	15	0.0394737	3	15	0.0625	0.0601974	0.0578947	0.0555921	0.0532895	0.0509868
493	ADU-TWUM FREDERICK ASANTE	Male
	QUAICOE ENOCH	Male	2	20	0.0350877	2	20	0.0555556	0.0535088	0.051462	0.0494152	0.0473684	0.0453216
	QUANSAH BELINDA	Female	2	25	0.0438596	2	25	0.0694444	0.066886	0.0643275	0.061769	0.0592105	0.056652
	QUARTEY EVELYN NAA KWARLEY	Female	3	30	0.0789474	3	30	0.125	0.120395	0.115789	0.111184	0.106579	0.101974
494	ADUSEI GIFTY YEBOAH	Female
	QUARTEY SALOMEY	Female	2	35	0.0614035	2	35	0.0972222	0.0936404	0.0900585	0.0864766	0.0828947	0.0793129
	SAHEED AZEEZAT	Female	3	40	0.105263	3	40	0.166667	0.160526	0.154386	0.148246	0.142105	0.135965
	SHAIBU FAUZIYATU	Female	2	45	0.0789474	2	45	0.125	0.120395	0.115789	0.111184	0.106579	0.101974
495	ADUUM REBECCA	Female
	AFARI STEPHEN	Male	2	50	0.0877193	2	50	0.138889	0.133772	0.128655	0.123538	0.118421	0.113304
	AFOTEY PATRICK DUNYO	Male	3	55	0.144737	3	55	0.229167	0.220724	0.212281	0.203838	0.195395	0.186952
	AFRAH TRACY NTOW	Female	2	60	0.105263	2	60	0.166667	0.160526	0.154386	0.148246	0.142105	0.135965
496	ABABIO ABEDNEGO A.	Male
	ABOAGYE ELIZABETH BOADIWAA	Female	7	10	0.0614035	6	10	0.0833333	0.0811404	0.0789474	0.0767544	0.0745614	0.0723684
	ABOE ANDREWS	Male	5	60	0.263158	4	60	0.333333	0.326316	0.319298	0.312281	0.305263	0.298246
	ABRAHAM-QUANSAH MARY EVA	Female	4	65	0.22807	3	65	0.270833	0.266557	0.262281	0.258004	0.253728	0.249452
497	ABALEM JENNIFER	Female
	ADDAE SANDRA	Female	4	30	0.105263	1	30	0.0416667	0.0480263	0.054386	0.0607456	0.0671053	0.0734649
	ADJEI FREDERICK YAW	Male	5	35	0.153509	2	35	0.0972222	0.102851	0.10848	0.114108	0.119737	0.125365
	ADJEI PRINCE BAFFOUR	Male	6	25	0.131579	1	25	0.0347222	0.0444079	0.0540936	0.0637792	0.0734649	0.0831506
498	ABBAN VIDA OWUSU	Female
	ADJEI SAMUEL	Male	7	50	0.307018	2	10	0.0277778	0.0557018	0.0836257	0.11155	0.139474	0.167398
	ADJORLOLO MERCY NORKPLIM	Female	4	30	0.105263	3	30	0.125	0.123026	0.121053	0.119079	0.117105	0.115132
	ADOCTOR VICTORIA	Female	5	45	0.197368	4	45	0.25	0.244737	0.239474	0.234211	0.228947	0.223684
499	ADU AFRIYIE	Male
	ADU EMMANUEL	Male	7	35	0.214912	6	35	0.291667	0.283991	0.276316	0.26864	0.260965	0.253289
	ADZOWU MILLICENT	Female	1	10	0.00877193	2	65	0.180556	0.163377	0.146199	0.12902	0.111842	0.0946637
	AFORDE JAMES ABLORDE	Male	2	50	0.0877193	2	50	0.138889	0.133772	0.128655	0.123538	0.118421	0.113304
500	ABDALLAH FATIMATU	Female
[truncated: 2,418 more rows]
[truncated: 2 more columns]

## Sheet: Personality
ACCRA TECHNICAL UNIVERSITY
ATU Dataset - HND Marketing		BIG FIVE PERSONALITY TRAIT RATINGS (1 - 5)								PERSONALITY RATINGS (1 - 5)
No.	NAME	SEX	EXTRAVERSION	AGREEABLENESS	CONSCIENTIOUSNESS	NEUROTICISM	OPENNESS			1	2	3	4	5
1	ABABIO ABEDNEGO A.	Male	5	4	3	2	1		Extraversion	1029	1136	413	1185	633
2	ABOAGYE ELIZABETH BOADIWAA	Female	5	4	3	2	5		Agreeableness	1132	1256	498	800	1256
3	ABOE ANDREWS	Male	3	4	5	1	4		Conscientiousness	750	817	1276	1049	504
4	ABRAHAM-QUANSAH MARY EVA	Female	2	1	1	2	3		Neuroticism	683	548	1499	1071	595
5	ABALEM JENNIFER	Female	1	2	3	4	5		Openness	1069	563	841	236	1687
6	ADDAE SANDRA	Female	1	2	3	4	5		Total Ratings	4664	4322	4530	4345	4680
7	ADJEI FREDERICK YAW	Male	3	4	5	1	2		Grand Total of all Ratings	22541
8	ADJEI PRINCE BAFFOUR	Male	1	2	3	4	5
9	ABBAN VIDA OWUSU	Female	1	2	3	4	5
10	ADJEI SAMUEL	Male	5	2	3	4	5
11	ADJORLOLO MERCY NORKPLIM	Female	4	1	5	4	3
12	ADOCTOR VICTORIA	Female	3	2	1	1	2
13	ADU AFRIYIE	Male	5	4	3	2	1
14	ADU EMMANUEL	Male	5	4	3	2	1
15	ADZOWU MILLICENT	Female	2	1	5	4	3
16	AFORDE JAMES ABLORDE	Male	5	4	3	2	1
17	ABDALLAH FATIMATU	Female	2	1	4	3	1
18	AGBENYEGA STEPHEN	Male	2	5	4	3	5
19	AGBOGBA LANDRY KWAME	Male	1	4	4	5	4
20	AGGERH BARNABAS KOBBY	Male	2	3	1	1	3
21	ABDULAI FAIZA	Female	4	5	2	3	5
22	AGOE JEHOSHAPHAT SOWAH	Male	4	5	2	3	5
23	AGUDA NARKIE PATRICIA	Female	1	2	4	5	2
24	AGYARE PRISCILLA DARFOUR	Female	4	5	2	3	5
25	ABEKAH EMMANUEL	Male	4	5	2	3	5
26	AGYEI RICHARD KWAME	Male	4	5	2	3	5
27	AGYEMAN DUAH BOATEMAA	Female	4	3	1	5	3
28	AGYEMAN PAUL BOAKYE	Male	1	2	2	1	2
29	ABOAGYE DAVID ADU	Male	2	1	4	3	1
30	AGYIRI GEORGINA	Female	2	1	4	3	1
31	AHIABLEY PORTIA	Female	4	3	1	5	3
32	AHONI MAUDLIN AYONGO	Female	2	1	4	3	1
33	ABOAGYE FELIX	Male	4	5	2	3	5
34	AKAGBO REBECCA	Female	4	5	2	3	5
35	AKOTO REINDOLF APPIAH	Male	4	3	1	5	3
36	AKUFFO GIDEON	Male	1	2	2	1	2
37	ABU ABDUL MANAF	Male	2	1	4	3	1
38	ALAGBO EMMANUEL	Male	2	1	4	3	1
39	ALLOTEY KPAKPO VINCENT	Male	4	3	1	5	3
40	ALLOTEY PEARL NAA AKU	Female	2	1	4	3	1
41	ABUBAKAR ARAFAT SUFYAN	Male	1	2	3	4	5
42	AMAKYE JAMES SARPONG	Male	1	2	3	4	5
43	AMEVOR ERIC	Male	3	4	5	1	2
44	AMOAH CHARLOTTE KORKOR	Female	1	2	3	4	5
45	ACHEAMPONG CHRISTABEL	Female	1	2	3	4	5
46	AMOAH MILDRED	Female	5	2	3	4	5
47	AMOAKO ERNESTINA OPOKUA	Female	4	1	5	4	3
48	AMPONSAH CECILIA ABENA	Female	3	2	1	1	2
49	ACHEAMPONG KINGSLEY	Male	5	4	3	2	1
50	AMUZU STELLA KABUKI	Female	5	4	3	2	5
51	ANABI MUSAH AHMED	Male	3	4	5	1	4
52	ANDERSON GIFTY	Female	2	1	1	2	3
53	ACHEAMPONG MICHAEL APPIAH	Male	1	2	3	4	5
54	ANDERSON VIVIAN	Female	1	2	3	4	5
55	ANKOMAH GEORGINA	Female	3	4	5	1	2
56	ANNANG FRANCISCA TORSHIE	Female	1	2	3	4	5
57	ACQUAH BENJAMIN	Male	1	2	3	4	5
58	ANNOR RICHAEL	Female	5	2	3	4	5
59	ANSAH FAUSTINA	Female	4	1	5	4	3
60	ANSAH MARFO DOREEN	Female	3	2	1	1	2
61	ACQUAH KINGSLEY OCANSEY	Male	5	4	3	2	1
62	ANTHONIO HENRIETTA	Female	5	4	3	2	1
63	APPIAH ISAAC	Male	2	1	5	4	3
64	APPIAH MOSES	Male	5	4	3	2	1
65	ACQUAH PHILIP	Male	2	1	4	3	1
66	APPIAH PRINCE KWESI	Male	2	5	4	3	5
67	ARKO HAGAR	Female	1	4	4	5	4
68	ARKOH GALAHAD AHINSAH	Female	2	3	1	1	3
69	ADAM HALIMATU SADIA	Female	4	5	2	3	5
70	ARTHUR EBENEZER	Male	4	5	2	3	5
71	ARTHUR ESSUMAN JAMES	Male	1	2	4	5	2
72	ARYEETEY MESHACK	Male	4	5	2	3	5
73	ADAMA-TETTEY MARYNSKY	Female	4	5	2	3	5
74	ASABIRE SOPHIA	Female	4	5	2	3	5
75	ASAHENE EMMANUELLA	Female	4	3	1	5	3
76	ASAMANY CARL	Male	1	2	2	1	2
77	ADAMS AFISHETU	Female	2	1	4	3	1
78	ASAMOAH MERCY	Female	2	1	4	3	1
79	ASARE ERIC AGYIRI AWERE	Male	4	3	1	5	3
80	ASHITEY MCZILL HAFIZ OKO	Male	2	1	4	3	1
81	ADAMS ANASS	Male	2	1	4	3	1
82	ASIEDU MAVIS	Female	2	1	4	3	1
83	ATIEMO JOSEPHINE	Female	4	3	1	5	3
84	AWUDER WILLIAM YAO	Male	2	1	4	3	1
85	ADARKWAH IRENE	Female	1	2	3	4	5
86	AYER PERCY OKAI	Male	1	2	3	4	5
87	AYISI BENJAMIN	Male	3	4	5	1	2
88	AZAMETSI MIRABLE	Female	1	2	3	4	5
89	ADDAE PORTIA	Female	1	2	3	4	5
90	BEDIAKO PRISCILLA ODURO	Female	5	2	3	4	5
91	BELLEY BETTY	Female	4	1	5	4	3
92	BOATEMAA SLYVIA	Female	3	2	1	1	2
93	ADDEY AUGUSTINE	Male	5	4	3	2	1
94	BOATENG ABRAHAM AMEGAVIE	Male	5	4	3	2	5
95	BONDZIE SAMUEL AIDOO	Male	3	4	5	1	4
96	BONI MAXWELL EDEM	Male	2	1	1	2	3
97	ADDICO FRANCIS AWULEY	Male	1	2	3	4	5
98	BOTCHWAY HANNAH	Female	1	2	3	4	5
99	BOTCHWAY JEMIMA ATSWEI	Female	3	4	5	1	2
100	BOTCHWAY MICHAEL	Male	1	2	3	4	5
101	ADDISON EMMANUEL	Male	1	2	3	4	5
102	BOYETEY SOLOMON BUERNOR	Male	5	2	3	4	5
103	BRENYAH SYLVESTER	Male	4	1	5	4	3
104	CLELAND VERA VASTU	Female	3	2	1	1	2
105	ADDISON STEPHEN EBO	Male	5	4	3	2	1
106	DADZIE ISAAC	Male	5	4	3	2	1
107	DAMALIE DEBORAH YAYRA	Female	2	1	5	4	3
108	DARKO MOSES	Male	5	4	3	2	1
109	ADDO NAOMI	Female	2	1	4	3	1
110	DARKOA DORA	Female	2	5	4	3	5
111	DENTAAH AMPOFO PATIENCE O.	Female	1	4	4	5	4
112	DJIDONU DANIEL KWESI	Male	2	3	1	1	3
113	ADDO PATIENCE	Female	4	5	2	3	5
114	DOE KENNEDY	Male	4	5	2	3	5
115	DOKU ESTHER MAKU	Female	1	2	4	5	2
116	DOWUONA PRISCILLA NORKAI	Female	4	5	2	3	5
117	ADDY MELIORA GENEVIEVE	Female	4	5	2	3	5
118	DZRAMADO SANDRA	Female	4	5	2	3	5
119	DZUFLE BRIDGET	Female	4	3	1	5	3
120	EDZEOU BERNARD	Male	1	2	2	1	2
121	ADEKPUITOR PETER	Male	2	1	4	3	1
122	ENTSIEH EVANS	Male	2	1	4	3	1
123	FOMETU GLADYS COURINE	Female	4	3	1	5	3
124	GANYO REBECCA EYRAM	Female	2	1	4	3	1
125	ADEKU CALEB KOJO	Male	2	1	4	3	1
126	GBADGO CHARLOTTE	Female	2	1	4	3	1
127	GODOMEY ABRAHAM	Male	4	3	1	5	3
128	GYAN FELICIA	Female	2	1	4	3	1
129	ADETI CLIFFORD KWABLA	Male	1	2	3	4	5
130	GYAN MANTEY	Male	1	2	3	4	5
131	GYEKYE EMMANUEL	Male	3	4	5	1	2
132	HAGAN EDWIN EBOH	Male	1	2	3	4	5
133	ADINKRAH ABIGAIL	Female	1	2	3	4	5
134	HAMMOND NATHANIEL	Male	5	2	3	4	5
135	IBRAHIM MOHAMMED SANUSI	Male	4	1	5	4	3
136	IBRAHIM SEMIRATU	Female	3	2	1	1	2
137	ADIOK JOSHUA ALLEN	Male	5	4	3	2	1
138	INUSAH MOHAMMED	Male	5	4	3	2	5
139	KABAH ALIAYIRE ALEX	Male	3	4	5	1	4
140	KELVIN NKANSAH	Male	2	1	1	2	3
141	ADJAKLOE FLOSSIE DZIFA	Female	1	2	3	4	5
142	KUDJUH BRIGHT DOSU	Male	1	2	3	4	5
143	KUMI DANIEL DARKO	Male	3	4	5	1	2
144	KUMI MARY POKUAA	Female	1	2	3	4	5
145	ADJASOO LINDA SELINAM	Female	1	2	3	4	5
146	KUSI LYDIA ADJOA ADJEIWAA	Female	5	2	3	4	5
147	KWARTENG JESSE SARPONG	Male	4	1	5	4	3
148	LANTEI- LAMPTEY JESSE NII	Male	3	2	1	1	2
149	ADJEI - BAAH STEPHEN	Male	5	4	3	2	1
150	MASOPEH FELICIA VANILLA NAA AMELEY	Female	5	4	3	2	1
151	MENDS FIDELIA APPIAH	Female	2	1	5	4	3
152	MENSAH BETTY TELUS	Female	5	4	3	2	1
153	ADJEI BELINDA ADJETEY	Female	2	1	4	3	1
154	MENSAH CHARLES GYAMFI	Male	2	5	4	3	5
155	MENSAH PHILOMINA TECHIE	Female	1	4	4	5	4
156	MENYE GODWIN JR	Male	2	3	1	1	3
157	ADJEI DANIEL	Male	4	5	2	3	5
158	MOHAMMED ADAM ZAKIYU	Male	4	5	2	3	5
159	NARTEH GEOFFREY	Male	1	2	4	5	2
160	NKANSAH LOCTUS ADJEI	Female	4	5	2	3	5
161	ADJEI HENRY	Male	4	5	2	3	5
162	NORTEY NICHOLAS	Male	4	5	2	3	5
163	NUAMAH SAMUEL	Male	4	3	1	5	3
164	NUKPE DAVID CONVERY	Male	1	2	2	1	2
165	ADJEI JENNIFER ODUA	Female	2	1	4	3	1
166	NYARKO ANISA	Female	2	1	4	3	1
167	NYARKO NICHOLAS	Male	4	3	1	5	3
168	NYARKO WILLIAM KWABENA	Male	2	1	4	3	1
169	ADJEIBEA RACHEAL	Female	2	1	4	3	1
170	NYEDU ISHMAEL	Male	2	1	4	3	1
171	OBENG JULIANA	Female	4	3	1	5	3
172	OBUOBI SOLOMON	Male	2	1	4	3	1
173	ADJETEY ERAMI NII ADJEI	Male	1	2	3	4	5
174	ODOI ERIC AKO	Male	1	2	3	4	5
175	OFFEI OSEI FRANCIS	Male	3	4	5	1	2
176	OPOKU SAMUEL	Male	1	2	3	4	5
177	ADJIN-TETTEY JEREMIAH	Male	1	2	3	4	5
178	OPOKUA GIFTY NANA AMA	Female	5	2	3	4	5
179	OSEI RICHMOND KOFI	Male	4	1	5	4	3
180	OUEDORAOGO ROGER PETER	Male	3	2	1	1	2
181	ADJOKATSE BERNICE	Female	5	4	3	2	1
182	OWUSU ALEX	Male	5	4	3	2	5
183	OWUSU-APENTENG STEPHEN	Male	3	4	5	1	4
184	PARRY JESSICA	Male	2	1	1	2	3
185	ADOM JENNIFER ESTHER OHENEBA	Female	1	2	3	4	5
186	QUAICOE ENOCH	Male	1	2	3	4	5
187	QUANSAH BELINDA	Female	3	4	5	1	2
188	QUARTEY EVELYN NAA KWARLEY	Female	1	2	3	4	5
189	ADOM KWADWO BOAKYE	Male	1	2	3	4	5
190	QUARTEY SALOMEY	Female	5	2	3	4	5
191	SAHEED AZEEZAT	Female	4	1	5	4	3
192	SHAIBU FAUZIYATU	Female	3	2	1	1	2
193	ADU BONA SUSANNA	Female	5	4	3	2	1
194	SOWAH ALEXANDRA ENYONAM	Female	5	4	3	2	1
195	SULLEY HINDU MUNIRU	Female	2	1	5	4	3
196	TAGOE DAVID	Male	5	4	3	2	1
197	ADU DORA	Female	2	1	4	3	1
198	TAWIAH ADAMA OKOE	Male	2	5	4	3	5
199	TETTEH KELVIN	Male	1	4	4	5	4
200	TETTEH MALVIN	Male	2	3	1	1	3
201	ADU PRISCILLA NKETIA	Female	4	5	2	3	5
202	WADIE LINDA NKANSAH	Female	4	5	2	3	5
203	WENOMA LINDA	Female	1	2	4	5	2
204	YARTEY SEFIATU	Female	4	5	2	3	5
205	ADU-AGYEI AWURA AKUA	Female	4	5	2	3	5
206	OWUSU ALEX	Male	4	5	2	3	5
207	OWUSU-APENTENG STEPHEN	Male	4	3	1	5	3
208	PARRY JESSICA	Male	1	2	2	1	2
209	ADU-TWUM FREDERICK ASANTE	Male	2	1	4	3	1
210	QUAICOE ENOCH	Male	2	1	4	3	1
211	QUANSAH BELINDA	Female	4	3	1	5	3
212	QUARTEY EVELYN NAA KWARLEY	Female	2	1	4	3	1
213	ADUSEI GIFTY YEBOAH	Female	5	4	3	2	1
214	QUARTEY SALOMEY	Female	5	4	3	2	5
215	SAHEED AZEEZAT	Female	3	4	5	1	4
216	SHAIBU FAUZIYATU	Female	2	1	1	2	3
217	ADUUM REBECCA	Female	1	2	3	4	5
218	AFARI STEPHEN	Male	1	2	3	4	5
219	AFOTEY PATRICK DUNYO	Male	3	4	5	1	2
220	AFRAH TRACY NTOW	Female	1	2	3	4	5
221	ABABIO ABEDNEGO A.	Male	1	2	3	4	5
222	ABOAGYE ELIZABETH BOADIWAA	Female	5	2	3	4	5
223	ABOE ANDREWS	Male	4	1	5	4	3
224	ABRAHAM-QUANSAH MARY EVA	Female	3	2	1	1	2
225	ABALEM JENNIFER	Female	5	4	3	2	1
226	ADDAE SANDRA	Female	5	4	3	2	1
227	ADJEI FREDERICK YAW	Male	2	1	5	4	3
228	ADJEI PRINCE BAFFOUR	Male	5	4	3	2	1
229	ABBAN VIDA OWUSU	Female	2	1	4	3	1
230	ADJEI SAMUEL	Male	2	5	4	3	5
231	ADJORLOLO MERCY NORKPLIM	Female	1	4	4	5	4
232	ADOCTOR VICTORIA	Female	2	3	1	1	3
233	ADU AFRIYIE	Male	4	5	2	3	5
234	ADU EMMANUEL	Male	4	5	2	3	5
235	ADZOWU MILLICENT	Female	1	2	4	5	2
236	AFORDE JAMES ABLORDE	Male	4	5	2	3	5
237	ABDALLAH FATIMATU	Female	4	5	2	3	5
238	AGBENYEGA STEPHEN	Male	4	5	2	3	5
239	AGBOGBA LANDRY KWAME	Male	4	3	1	5	3
240	AGGERH BARNABAS KOBBY	Male	1	2	2	1	2
241	ABDULAI FAIZA	Female	2	1	4	3	1
242	AGOE JEHOSHAPHAT SOWAH	Male	2	1	4	3	1
243	AGUDA NARKIE PATRICIA	Female	4	3	1	5	3
244	AGYARE PRISCILLA DARFOUR	Female	2	1	4	3	1
245	ABEKAH EMMANUEL	Male	4	5	2	3	5
246	AGYEI RICHARD KWAME	Male	4	5	2	3	5
247	AGYEMAN DUAH BOATEMAA	Female	4	3	1	5	3
248	AGYEMAN PAUL BOAKYE	Male	1	2	2	1	2
249	ABOAGYE DAVID ADU	Male	2	1	4	3	1
250	AGYIRI GEORGINA	Female	2	1	4	3	1
251	AHIABLEY PORTIA	Female	4	3	1	5	3
252	AHONI MAUDLIN AYONGO	Female	2	1	4	3	1
253	ABOAGYE FELIX	Male	5	4	3	2	1
254	AKAGBO REBECCA	Female	5	4	3	2	5
255	AKOTO REINDOLF APPIAH	Male	3	4	5	1	4
256	AKUFFO GIDEON	Male	2	1	1	2	3
257	ABU ABDUL MANAF	Male	1	2	3	4	5
258	ALAGBO EMMANUEL	Male	1	2	3	4	5
259	ALLOTEY KPAKPO VINCENT	Male	3	4	5	1	2
260	ALLOTEY PEARL NAA AKU	Female	1	2	3	4	5
261	ABUBAKAR ARAFAT SUFYAN	Male	1	2	3	4	5
262	AMAKYE JAMES SARPONG	Male	5	2	3	4	5
263	AMEVOR ERIC	Male	4	1	5	4	3
264	AMOAH CHARLOTTE KORKOR	Female	3	2	1	1	2
265	ACHEAMPONG CHRISTABEL	Female	5	4	3	2	1
266	AMOAH MILDRED	Female	5	4	3	2	1
267	AMOAKO ERNESTINA OPOKUA	Female	2	1	5	4	3
268	AMPONSAH CECILIA ABENA	Female	5	4	3	2	1
269	ACHEAMPONG KINGSLEY	Male	2	1	4	3	1
270	AMUZU STELLA KABUKI	Female	2	5	4	3	5
271	ANABI MUSAH AHMED	Male	1	4	4	5	4
272	ANDERSON GIFTY	Female	2	3	1	1	3
273	ACHEAMPONG MICHAEL APPIAH	Male	4	5	2	3	5
274	ANDERSON VIVIAN	Female	4	5	2	3	5
275	ANKOMAH GEORGINA	Female	1	2	4	5	2
276	ANNANG FRANCISCA TORSHIE	Female	4	5	2	3	5
277	ACQUAH BENJAMIN	Male	4	5	2	3	5
278	ANNOR RICHAEL	Female	4	5	2	3	5
279	ANSAH FAUSTINA	Female	4	3	1	5	3
280	ANSAH MARFO DOREEN	Female	1	2	2	1	2
281	ACQUAH KINGSLEY OCANSEY	Male	2	1	4	3	1
282	ANTHONIO HENRIETTA	Female	2	1	4	3	1
283	APPIAH ISAAC	Male	4	3	1	5	3
284	APPIAH MOSES	Male	2	1	4	3	1
285	ACQUAH PHILIP	Male	4	5	2	3	5
286	APPIAH PRINCE KWESI	Male	4	5	2	3	5
287	ARKO HAGAR	Female	4	3	1	5	3
288	ARKOH GALAHAD AHINSAH	Female	1	2	2	1	2
289	ADAM HALIMATU SADIA	Female	2	1	4	3	1
290	ARTHUR EBENEZER	Male	2	1	4	3	1
291	ARTHUR ESSUMAN JAMES	Male	4	3	1	5	3
292	ARYEETEY MESHACK	Male	2	1	4	3	1
293	ADAMA-TETTEY MARYNSKY	Female	1	2	3	4	5
294	ASABIRE SOPHIA	Female	1	2	3	4	5
295	ASAHENE EMMANUELLA	Female	3	4	5	1	2
296	ASAMANY CARL	Male	1	2	3	4	5
297	ADAMS AFISHETU	Female	1	2	3	4	5
298	ASAMOAH MERCY	Female	5	2	3	4	5
299	ASARE ERIC AGYIRI AWERE	Male	4	1	5	4	3
300	ASHITEY MCZILL HAFIZ OKO	Male	3	2	1	1	2
301	ADAMS ANASS	Male	5	4	3	2	1
302	ASIEDU MAVIS	Female	5	4	3	2	5
303	ATIEMO JOSEPHINE	Female	3	4	5	1	4
304	AWUDER WILLIAM YAO	Male	2	1	1	2	3
305	ADARKWAH IRENE	Female	1	2	3	4	5
306	AYER PERCY OKAI	Male	1	2	3	4	5
307	AYISI BENJAMIN	Male	3	4	5	1	2
308	AZAMETSI MIRABLE	Female	1	2	3	4	5
309	ADDAE PORTIA	Female	1	2	3	4	5
310	BEDIAKO PRISCILLA ODURO	Female	5	2	3	4	5
311	BELLEY BETTY	Female	4	1	5	4	3
312	BOATEMAA SLYVIA	Female	3	2	1	1	2
313	ADDEY AUGUSTINE	Male	5	4	3	2	1
314	BOATENG ABRAHAM AMEGAVIE	Male	5	4	3	2	1
315	BONDZIE SAMUEL AIDOO	Male	2	1	5	4	3
316	BONI MAXWELL EDEM	Male	5	4	3	2	1
317	ADDICO FRANCIS AWULEY	Male	2	1	4	3	1
318	BOTCHWAY HANNAH	Female	2	5	4	3	5
319	BOTCHWAY JEMIMA ATSWEI	Female	1	4	4	5	4
320	BOTCHWAY MICHAEL	Male	2	3	1	1	3
321	ADDISON EMMANUEL	Male	4	5	2	3	5
322	BOYETEY SOLOMON BUERNOR	Male	4	5	2	3	5
323	BRENYAH SYLVESTER	Male	1	2	4	5	2
324	CLELAND VERA VASTU	Female	4	5	2	3	5
325	ADDISON STEPHEN EBO	Male	4	5	2	3	5
326	DADZIE ISAAC	Male	4	5	2	3	5
327	DAMALIE DEBORAH YAYRA	Female	4	3	1	5	3
328	DARKO MOSES	Male	1	2	2	1	2
329	ADDO NAOMI	Female	2	1	4	3	1
330	DARKOA DORA	Female	2	1	4	3	1
331	DENTAAH AMPOFO PATIENCE O.	Female	4	3	1	5	3
332	DJIDONU DANIEL KWESI	Male	2	1	4	3	1
333	ADDO PATIENCE	Female	2	1	4	3	1
334	DOE KENNEDY	Male	2	1	4	3	1
335	DOKU ESTHER MAKU	Female	4	3	1	5	3
336	DOWUONA PRISCILLA NORKAI	Female	2	1	4	3	1
337	ADDY MELIORA GENEVIEVE	Female	1	2	3	4	5
338	DZRAMADO SANDRA	Female	1	2	3	4	5
339	DZUFLE BRIDGET	Female	3	4	5	1	2
340	EDZEOU BERNARD	Male	1	2	3	4	5
341	ADEKPUITOR PETER	Male	1	2	3	4	5
342	ENTSIEH EVANS	Male	5	2	3	4	5
343	FOMETU GLADYS COURINE	Female	4	1	5	4	3
344	GANYO REBECCA EYRAM	Female	3	2	1	1	2
345	ADEKU CALEB KOJO	Male	5	4	3	2	1
346	GBADGO CHARLOTTE	Female	5	4	3	2	5
347	GODOMEY ABRAHAM	Male	3	4	5	1	4
348	GYAN FELICIA	Female	2	1	1	2	3
349	ADETI CLIFFORD KWABLA	Male	1	2	3	4	5
350	GYAN MANTEY	Male	1	2	3	4	5
351	GYEKYE EMMANUEL	Male	3	4	5	1	2
352	HAGAN EDWIN EBOH	Male	1	2	3	4	5
353	ADINKRAH ABIGAIL	Female	1	2	3	4	5
354	HAMMOND NATHANIEL	Male	5	2	3	4	5
355	IBRAHIM MOHAMMED SANUSI	Male	4	1	5	4	3
356	IBRAHIM SEMIRATU	Female	3	2	1	1	2
357	ADIOK JOSHUA ALLEN	Male	5	4	3	2	1
358	INUSAH MOHAMMED	Male	5	4	3	2	1
359	KABAH ALIAYIRE ALEX	Male	2	1	5	4	3
360	KELVIN NKANSAH	Male	5	4	3	2	1
361	ADJAKLOE FLOSSIE DZIFA	Female	2	1	4	3	1
362	KUDJUH BRIGHT DOSU	Male	2	5	4	3	5
363	KUMI DANIEL DARKO	Male	1	4	4	5	4
364	KUMI MARY POKUAA	Female	2	3	1	1	3
365	ADJASOO LINDA SELINAM	Female	4	5	2	3	5
366	KUSI LYDIA ADJOA ADJEIWAA	Female	4	5	2	3	5
367	KWARTENG JESSE SARPONG	Male	1	2	4	5	2
368	LANTEI- LAMPTEY JESSE NII	Male	4	5	2	3	5
369	ADJEI - BAAH STEPHEN	Male	4	5	2	3	5
370	MASOPEH FELICIA VANILLA NAA AMELEY	Female	4	5	2	3	5
371	MENDS FIDELIA APPIAH	Female	4	3	1	5	3
372	MENSAH BETTY TELUS	Female	1	2	2	1	2
373	ADJEI BELINDA ADJETEY	Female	2	1	4	3	1
374	MENSAH CHARLES GYAMFI	Male	2	1	4	3	1
375	MENSAH PHILOMINA TECHIE	Female	4	3	1	5	3
376	MENYE GODWIN JR	Male	2	1	4	3	1
377	ADJEI DANIEL	Male	2	1	4	3	1
378	MOHAMMED ADAM ZAKIYU	Male	2	1	4	3	1
379	NARTEH GEOFFREY	Male	4	3	1	5	3
380	NKANSAH LOCTUS ADJEI	Female	2	1	4	3	1
381	ADJEI HENRY	Male	1	2	3	4	5
382	NORTEY NICHOLAS	Male	1	2	3	4	5
383	NUAMAH SAMUEL	Male	3	4	5	1	2
384	NUKPE DAVID CONVERY	Male	1	2	3	4	5
385	ADJEI JENNIFER ODUA	Female	1	2	3	4	5
386	NYARKO ANISA	Female	5	2	3	4	5
387	NYARKO NICHOLAS	Male	4	1	5	4	3
388	NYARKO WILLIAM KWABENA	Male	3	2	1	1	2
389	ADJEIBEA RACHEAL	Female	5	4	3	2	1
390	NYEDU ISHMAEL	Male	5	4	3	2	5
391	OBENG JULIANA	Female	3	4	5	1	4
392	OBUOBI SOLOMON	Male	2	1	1	2	3
393	ADJETEY ERAMI NII ADJEI	Male	1	2	3	4	5
394	ODOI ERIC AKO	Male	1	2	3	4	5
395	OFFEI OSEI FRANCIS	Male	3	4	5	1	2
396	OPOKU SAMUEL	Male	1	2	3	4	5
397	ADJIN-TETTEY JEREMIAH	Male	1	2	3	4	5
398	OPOKUA GIFTY NANA AMA	Female	5	2	3	4	5
399	OSEI RICHMOND KOFI	Male	4	1	5	4	3
400	OUEDORAOGO ROGER PETER	Male	3	2	1	1	2
401	ADJOKATSE BERNICE	Female	5	4	3	2	1
402	OWUSU ALEX	Male	5	4	3	2	1
403	OWUSU-APENTENG STEPHEN	Male	2	1	5	4	3
404	PARRY JESSICA	Male	5	4	3	2	1
405	ADOM JENNIFER ESTHER OHENEBA	Female	2	1	4	3	1
406	QUAICOE ENOCH	Male	2	5	4	3	5
407	QUANSAH BELINDA	Female	1	4	4	5	4
408	QUARTEY EVELYN NAA KWARLEY	Female	2	3	1	1	3
409	ADOM KWADWO BOAKYE	Male	4	5	2	3	5
410	QUARTEY SALOMEY	Female	4	5	2	3	5
411	SAHEED AZEEZAT	Female	1	2	4	5	2
412	SHAIBU FAUZIYATU	Female	4	5	2	3	5
413	ADU BONA SUSANNA	Female	4	5	2	3	5
414	SOWAH ALEXANDRA ENYONAM	Female	4	5	2	3	5
415	SULLEY HINDU MUNIRU	Female	4	3	1	5	3
416	TAGOE DAVID	Male	1	2	2	1	2
417	ADU DORA	Female	2	1	4	3	1
418	TAWIAH ADAMA OKOE	Male	2	1	4	3	1
419	TETTEH KELVIN	Male	4	3	1	5	3
420	TETTEH MALVIN	Male	2	1	4	3	1
421	ADU PRISCILLA NKETIA	Female	2	1	4	3	1
422	WADIE LINDA NKANSAH	Female	2	1	4	3	1
423	WENOMA LINDA	Female	4	3	1	5	3
424	YARTEY SEFIATU	Female	2	1	4	3	1
425	ADU-AGYEI AWURA AKUA	Female	1	2	3	4	5
426	OWUSU ALEX	Male	1	2	3	4	5
427	OWUSU-APENTENG STEPHEN	Male	3	4	5	1	2
428	PARRY JESSICA	Male	1	2	3	4	5
429	ADU-TWUM FREDERICK ASANTE	Male	1	2	3	4	5
430	QUAICOE ENOCH	Male	5	2	3	4	5
431	QUANSAH BELINDA	Female	4	1	5	4	3
432	QUARTEY EVELYN NAA KWARLEY	Female	3	2	1	1	2
433	ADUSEI GIFTY YEBOAH	Female	5	4	3	2	1
434	QUARTEY SALOMEY	Female	5	4	3	2	5
435	SAHEED AZEEZAT	Female	3	4	5	1	4
436	SHAIBU FAUZIYATU	Female	2	1	1	2	3
437	ADUUM REBECCA	Female	1	2	3	4	5
438	AFARI STEPHEN	Male	1	2	3	4	5
439	AFOTEY PATRICK DUNYO	Male	3	4	5	1	2
440	AFRAH TRACY NTOW	Female	1	2	3	4	5
441	ABABIO ABEDNEGO A.	Male	1	2	3	4	5
442	ABOAGYE ELIZABETH BOADIWAA	Female	5	2	3	4	5
443	ABOE ANDREWS	Male	4	1	5	4	3
444	ABRAHAM-QUANSAH MARY EVA	Female	3	2	1	1	2
445	ABALEM JENNIFER	Female	5	4	3	2	1
446	ADDAE SANDRA	Female	5	4	3	2	1
447	ADJEI FREDERICK YAW	Male	2	1	5	4	3
448	ADJEI PRINCE BAFFOUR	Male	5	4	3	2	1
449	ABBAN VIDA OWUSU	Female	2	1	4	3	1
450	ADJEI SAMUEL	Male	2	5	4	3	5
451	ADJORLOLO MERCY NORKPLIM	Female	1	4	4	5	4
452	ADOCTOR VICTORIA	Female	2	3	1	1	3
453	ADU AFRIYIE	Male	4	5	2	3	5
454	ADU EMMANUEL	Male	4	5	2	3	5
455	ADZOWU MILLICENT	Female	1	2	4	5	2
456	AFORDE JAMES ABLORDE	Male	4	5	2	3	5
457	ABDALLAH FATIMATU	Female	4	5	2	3	5
458	AGBENYEGA STEPHEN	Male	4	5	2	3	5
459	AGBOGBA LANDRY KWAME	Male	4	3	1	5	3
460	AGGERH BARNABAS KOBBY	Male	1	2	2	1	2
461	ABDULAI FAIZA	Female	2	1	4	3	1
462	AGOE JEHOSHAPHAT SOWAH	Male	2	1	4	3	1
463	AGUDA NARKIE PATRICIA	Female	4	3	1	5	3
464	AGYARE PRISCILLA DARFOUR	Female	2	1	4	3	1
465	ABEKAH EMMANUEL	Male	5	4	3	2	1
466	AGYEI RICHARD KWAME	Male	5	4	3	2	5
467	AGYEMAN DUAH BOATEMAA	Female	3	4	5	1	4
468	AGYEMAN PAUL BOAKYE	Male	2	1	1	2	3
469	ABOAGYE DAVID ADU	Male	1	2	3	4	5
470	AGYIRI GEORGINA	Female	1	2	3	4	5
471	AHIABLEY PORTIA	Female	3	4	5	1	2
472	AHONI MAUDLIN AYONGO	Female	1	2	3	4	5
473	ABOAGYE FELIX	Male	1	2	3	4	5
474	AKAGBO REBECCA	Female	5	2	3	4	5
475	AKOTO REINDOLF APPIAH	Male	4	1	5	4	3
476	AKUFFO GIDEON	Male	3	2	1	1	2
477	ABU ABDUL MANAF	Male	5	4	3	2	1
478	ALAGBO EMMANUEL	Male	5	4	3	2	1
479	ALLOTEY KPAKPO VINCENT	Male	2	1	5	4	3
480	ALLOTEY PEARL NAA AKU	Female	5	4	3	2	1
481	ABUBAKAR ARAFAT SUFYAN	Male	2	1	4	3	1
482	AMAKYE JAMES SARPONG	Male	2	5	4	3	5
483	AMEVOR ERIC	Male	1	4	4	5	4
484	AMOAH CHARLOTTE KORKOR	Female	2	3	1	1	3
485	ACHEAMPONG CHRISTABEL	Female	4	5	2	3	5
486	AMOAH MILDRED	Female	4	5	2	3	5
487	AMOAKO ERNESTINA OPOKUA	Female	1	2	4	5	2
488	AMPONSAH CECILIA ABENA	Female	4	5	2	3	5
489	ACHEAMPONG KINGSLEY	Male	4	5	2	3	5
490	AMUZU STELLA KABUKI	Female	4	5	2	3	5
491	ANABI MUSAH AHMED	Male	4	3	1	5	3
492	ANDERSON GIFTY	Female	1	2	2	1	2
493	ACHEAMPONG MICHAEL APPIAH	Male	2	1	4	3	1
494	ANDERSON VIVIAN	Female	2	1	4	3	1
495	ANKOMAH GEORGINA	Female	4	3	1	5	3
496	ANNANG FRANCISCA TORSHIE	Female	2	1	4	3	1
497	ACQUAH BENJAMIN	Male	4	5	2	3	5
498	ANNOR RICHAEL	Female	4	5	2	3	5
499	ANSAH FAUSTINA	Female	4	3	1	5	3
500	ANSAH MARFO DOREEN	Female	1	2	2	1	2
501	ACQUAH KINGSLEY OCANSEY	Male	2	1	4	3	1
502	ANTHONIO HENRIETTA	Female	2	1	4	3	1
503	APPIAH ISAAC	Male	4	3	1	5	3
504	APPIAH MOSES	Male	2	1	4	3	1
505	ACQUAH PHILIP	Male	5	4	3	2	1
506	APPIAH PRINCE KWESI	Male	5	4	3	2	5
507	ARKO HAGAR	Female	3	4	5	1	4
508	ARKOH GALAHAD AHINSAH	Female	2	1	1	2	3
509	ADAM HALIMATU SADIA	Female	1	2	3	4	5
510	ARTHUR EBENEZER	Male	1	2	3	4	5
511	ARTHUR ESSUMAN JAMES	Male	3	4	5	1	2
512	ARYEETEY MESHACK	Male	1	2	3	4	5
513	ADAMA-TETTEY MARYNSKY	Female	1	2	3	4	5
514	ASABIRE SOPHIA	Female	5	2	3	4	5
515	ASAHENE EMMANUELLA	Female	4	1	5	4	3
516	ASAMANY CARL	Male	3	2	1	1	2
517	ADAMS AFISHETU	Female	5	4	3	2	1
518	ASAMOAH MERCY	Female	5	4	3	2	1
519	ASARE ERIC AGYIRI AWERE	Male	2	1	5	4	3
520	ASHITEY MCZILL HAFIZ OKO	Male	5	4	3	2	1
521	ADAMS ANASS	Male	2	1	4	3	1
522	ASIEDU MAVIS	Female	2	5	4	3	5
523	ATIEMO JOSEPHINE	Female	1	4	4	5	4
524	AWUDER WILLIAM YAO	Male	2	3	1	1	3
525	ADARKWAH IRENE	Female	4	5	2	3	5
526	AYER PERCY OKAI	Male	4	5	2	3	5
527	AYISI BENJAMIN	Male	1	2	4	5	2
528	AZAMETSI MIRABLE	Female	4	5	2	3	5
529	ADDAE PORTIA	Female	4	5	2	3	5
530	BEDIAKO PRISCILLA ODURO	Female	4	5	2	3	5
531	BELLEY BETTY	Female	4	3	1	5	3
532	BOATEMAA SLYVIA	Female	1	2	2	1	2
533	ADDEY AUGUSTINE	Male	2	1	4	3	1
534	BOATENG ABRAHAM AMEGAVIE	Male	2	1	4	3	1
535	BONDZIE SAMUEL AIDOO	Male	4	3	1	5	3
536	BONI MAXWELL EDEM	Male	2	1	4	3	1
537	ADDICO FRANCIS AWULEY	Male	4	5	2	3	5
538	BOTCHWAY HANNAH	Female	4	5	2	3	5
539	BOTCHWAY JEMIMA ATSWEI	Female	4	3	1	5	3
540	BOTCHWAY MICHAEL	Male	1	2	2	1	2
541	ADDISON EMMANUEL	Male	2	1	4	3	1
542	BOYETEY SOLOMON BUERNOR	Male	2	1	4	3	1
543	BRENYAH SYLVESTER	Male	4	3	1	5	3
544	CLELAND VERA VASTU	Female	2	1	4	3	1
545	ADDISON STEPHEN EBO	Male	1	2	3	4	5
546	DADZIE ISAAC	Male	1	2	3	4	5
547	DAMALIE DEBORAH YAYRA	Female	3	4	5	1	2
548	DARKO MOSES	Male	1	2	3	4	5
549	ADDO NAOMI	Female	1	2	3	4	5
550	DARKOA DORA	Female	5	2	3	4	5
551	DENTAAH AMPOFO PATIENCE O.	Female	4	1	5	4	3
552	DJIDONU DANIEL KWESI	Male	3	2	1	1	2
553	ADDO PATIENCE	Female	5	4	3	2	1
554	DOE KENNEDY	Male	5	4	3	2	5
555	DOKU ESTHER MAKU	Female	3	4	5	1	4
556	DOWUONA PRISCILLA NORKAI	Female	2	1	1	2	3
557	ADDY MELIORA GENEVIEVE	Female	1	2	3	4	5
558	DZRAMADO SANDRA	Female	1	2	3	4	5
559	DZUFLE BRIDGET	Female	3	4	5	1	2
560	EDZEOU BERNARD	Male	1	2	3	4	5
561	ADEKPUITOR PETER	Male	1	2	3	4	5
562	ENTSIEH EVANS	Male	5	2	3	4	5
563	FOMETU GLADYS COURINE	Female	4	1	5	4	3
564	GANYO REBECCA EYRAM	Female	3	2	1	1	2
565	ADEKU CALEB KOJO	Male	5	4	3	2	1
566	GBADGO CHARLOTTE	Female	5	4	3	2	1
567	GODOMEY ABRAHAM	Male	2	1	5	4	3
568	GYAN FELICIA	Female	5	4	3	2	1
569	ADETI CLIFFORD KWABLA	Male	2	1	4	3	1
570	GYAN MANTEY	Male	2	5	4	3	5
571	GYEKYE EMMANUEL	Male	1	4	4	5	4
572	HAGAN EDWIN EBOH	Male	2	3	1	1	3
573	ADINKRAH ABIGAIL	Female	4	5	2	3	5
574	HAMMOND NATHANIEL	Male	4	5	2	3	5
575	IBRAHIM MOHAMMED SANUSI	Male	1	2	4	5	2
576	IBRAHIM SEMIRATU	Female	4	5	2	3	5
577	ADIOK JOSHUA ALLEN	Male	4	5	2	3	5
578	INUSAH MOHAMMED	Male	4	5	2	3	5
579	KABAH ALIAYIRE ALEX	Male	4	3	1	5	3
580	KELVIN NKANSAH	Male	1	2	2	1	2
581	ADJAKLOE FLOSSIE DZIFA	Female	2	1	4	3	1
582	KUDJUH BRIGHT DOSU	Male	2	1	4	3	1
583	KUMI DANIEL DARKO	Male	4	3	1	5	3
584	KUMI MARY POKUAA	Female	2	1	4	3	1
585	ADJASOO LINDA SELINAM	Female	2	1	4	3	1
586	KUSI LYDIA ADJOA ADJEIWAA	Female	2	1	4	3	1
587	KWARTENG JESSE SARPONG	Male	4	3	1	5	3
588	LANTEI- LAMPTEY JESSE NII	Male	2	1	4	3	1
589	ADJEI - BAAH STEPHEN	Male	1	2	3	4	5
590	MASOPEH FELICIA VANILLA NAA AMELEY	Female	1	2	3	4	5
591	MENDS FIDELIA APPIAH	Female	3	4	5	1	2
592	MENSAH BETTY TELUS	Female	1	2	3	4	5
593	ADJEI BELINDA ADJETEY	Female	1	2	3	4	5
594	MENSAH CHARLES GYAMFI	Male	5	2	3	4	5
595	MENSAH PHILOMINA TECHIE	Female	4	1	5	4	3
596	MENYE GODWIN JR	Male	3	2	1	1	2
597	ADJEI DANIEL	Male	5	4	3	2	1
598	MOHAMMED ADAM ZAKIYU	Male	5	4	3	2	5
599	NARTEH GEOFFREY	Male	3	4	5	1	4
600	NKANSAH LOCTUS ADJEI	Female	2	1	1	2	3
601	ADJEI HENRY	Male	1	2	3	4	5
602	NORTEY NICHOLAS	Male	1	2	3	4	5
603	NUAMAH SAMUEL	Male	3	4	5	1	2
604	NUKPE DAVID CONVERY	Male	1	2	3	4	5
605	ADJEI JENNIFER ODUA	Female	1	2	3	4	5
606	NYARKO ANISA	Female	5	2	3	4	5
607	NYARKO NICHOLAS	Male	4	1	5	4	3
608	NYARKO WILLIAM KWABENA	Male	3	2	1	1	2
609	ADJEIBEA RACHEAL	Female	5	4	3	2	1
610	NYEDU ISHMAEL	Male	5	4	3	2	1
611	OBENG JULIANA	Female	2	1	5	4	3
612	OBUOBI SOLOMON	Male	5	4	3	2	1
613	ADJETEY ERAMI NII ADJEI	Male	2	1	4	3	1
614	ODOI ERIC AKO	Male	2	5	4	3	5
615	OFFEI OSEI FRANCIS	Male	1	4	4	5	4
616	OPOKU SAMUEL	Male	2	3	1	1	3
617	ADJIN-TETTEY JEREMIAH	Male	4	5	2	3	5
618	OPOKUA GIFTY NANA AMA	Female	4	5	2	3	5
619	OSEI RICHMOND KOFI	Male	1	2	4	5	2
620	OUEDORAOGO ROGER PETER	Male	4	5	2	3	5
621	ADJOKATSE BERNICE	Female	4	5	2	3	5
622	OWUSU ALEX	Male	4	5	2	3	5
623	OWUSU-APENTENG STEPHEN	Male	4	3	1	5	3
624	PARRY JESSICA	Male	1	2	2	1	2
625	ADOM JENNIFER ESTHER OHENEBA	Female	2	1	4	3	1
626	QUAICOE ENOCH	Male	2	1	4	3	1
627	QUANSAH BELINDA	Female	4	3	1	5	3
628	QUARTEY EVELYN NAA KWARLEY	Female	2	1	4	3	1
629	ADOM KWADWO BOAKYE	Male	2	1	4	3	1
630	QUARTEY SALOMEY	Female	2	1	4	3	1
631	SAHEED AZEEZAT	Female	4	3	1	5	3
632	SHAIBU FAUZIYATU	Female	2	1	4	3	1
633	ADU BONA SUSANNA	Female	1	2	3	4	5
634	SOWAH ALEXANDRA ENYONAM	Female	1	2	3	4	5
635	SULLEY HINDU MUNIRU	Female	3	4	5	1	2
636	TAGOE DAVID	Male	1	2	3	4	5
637	ADU DORA	Female	1	2	3	4	5
638	TAWIAH ADAMA OKOE	Male	5	2	3	4	5
639	TETTEH KELVIN	Male	4	1	5	4	3
640	TETTEH MALVIN	Male	3	2	1	1	2
641	ADU PRISCILLA NKETIA	Female	5	4	3	2	1
642	WADIE LINDA NKANSAH	Female	5	4	3	2	5
643	WENOMA LINDA	Female	3	4	5	1	4
644	YARTEY SEFIATU	Female	2	1	1	2	3
645	ADU-AGYEI AWURA AKUA	Female	1	2	3	4	5
646	OWUSU ALEX	Male	1	2	3	4	5
647	OWUSU-APENTENG STEPHEN	Male	3	4	5	1	2
648	PARRY JESSICA	Male	1	2	3	4	5
649	ADU-TWUM FREDERICK ASANTE	Male	1	2	3	4	5
650	QUAICOE ENOCH	Male	5	2	3	4	5
651	QUANSAH BELINDA	Female	4	1	5	4	3
652	QUARTEY EVELYN NAA KWARLEY	Female	3	2	1	1	2
653	ADUSEI GIFTY YEBOAH	Female	5	4	3	2	1
654	QUARTEY SALOMEY	Female	5	4	3	2	1
655	SAHEED AZEEZAT	Female	2	1	5	4	3
656	SHAIBU FAUZIYATU	Female	5	4	3	2	1
657	ADUUM REBECCA	Female	2	1	4	3	1
658	AFARI STEPHEN	Male	2	5	4	3	5
659	AFOTEY PATRICK DUNYO	Male	1	4	4	5	4
660	AFRAH TRACY NTOW	Female	2	3	1	1	3
661	ABABIO ABEDNEGO A.	Male	4	5	2	3	5
662	ABOAGYE ELIZABETH BOADIWAA	Female	4	5	2	3	5
663	ABOE ANDREWS	Male	1	2	4	5	2
664	ABRAHAM-QUANSAH MARY EVA	Female	4	5	2	3	5
665	ABALEM JENNIFER	Female	4	5	2	3	5
666	ADDAE SANDRA	Female	4	5	2	3	5
667	ADJEI FREDERICK YAW	Male	4	3	1	5	3
668	ADJEI PRINCE BAFFOUR	Male	1	2	2	1	2
669	ABBAN VIDA OWUSU	Female	2	1	4	3	1
670	ADJEI SAMUEL	Male	2	1	4	3	1
671	ADJORLOLO MERCY NORKPLIM	Female	4	3	1	5	3
672	ADOCTOR VICTORIA	Female	2	1	4	3	1
673	ADU AFRIYIE	Male	2	1	4	3	1
674	ADU EMMANUEL	Male	2	1	4	3	1
675	ADZOWU MILLICENT	Female	4	3	1	5	3
676	AFORDE JAMES ABLORDE	Male	2	1	4	3	1
677	ABDALLAH FATIMATU	Female	1	2	3	4	5
678	AGBENYEGA STEPHEN	Male	1	2	3	4	5
679	AGBOGBA LANDRY KWAME	Male	3	4	5	1	2
680	AGGERH BARNABAS KOBBY	Male	1	2	3	4	5
681	ABDULAI FAIZA	Female	1	2	3	4	5
682	AGOE JEHOSHAPHAT SOWAH	Male	5	2	3	4	5
683	AGUDA NARKIE PATRICIA	Female	4	1	5	4	3
684	AGYARE PRISCILLA DARFOUR	Female	3	2	1	1	2
685	ABEKAH EMMANUEL	Male	5	4	3	2	1
686	AGYEI RICHARD KWAME	Male	5	4	3	2	5
687	AGYEMAN DUAH BOATEMAA	Female	3	4	5	1	4
688	AGYEMAN PAUL BOAKYE	Male	2	1	1	2	3
689	ABOAGYE DAVID ADU	Male	1	2	3	4	5
690	AGYIRI GEORGINA	Female	1	2	3	4	5
691	AHIABLEY PORTIA	Female	3	4	5	1	2
692	AHONI MAUDLIN AYONGO	Female	1	2	3	4	5
693	ABOAGYE FELIX	Male	1	2	3	4	5
694	AKAGBO REBECCA	Female	5	2	3	4	5
695	AKOTO REINDOLF APPIAH	Male	4	1	5	4	3
696	AKUFFO GIDEON	Male	3	2	1	1	2
697	ABU ABDUL MANAF	Male	5	4	3	2	1
698	ALAGBO EMMANUEL	Male	5	4	3	2	1
699	ALLOTEY KPAKPO VINCENT	Male	2	1	5	4	3
700	ALLOTEY PEARL NAA AKU	Female	5	4	3	2	1
701	ABUBAKAR ARAFAT SUFYAN	Male	2	1	4	3	1
702	AMAKYE JAMES SARPONG	Male	2	5	4	3	5
703	AMEVOR ERIC	Male	1	4	4	5	4
704	AMOAH CHARLOTTE KORKOR	Female	2	3	1	1	3
705	ACHEAMPONG CHRISTABEL	Female	4	5	2	3	5
706	AMOAH MILDRED	Female	4	5	2	3	5
707	AMOAKO ERNESTINA OPOKUA	Female	1	2	4	5	2
708	AMPONSAH CECILIA ABENA	Female	4	5	2	3	5
709	ACHEAMPONG KINGSLEY	Male	4	5	2	3	5
710	AMUZU STELLA KABUKI	Female	4	5	2	3	5
711	ANABI MUSAH AHMED	Male	4	3	1	5	3
712	ANDERSON GIFTY	Female	1	2	2	1	2
713	ACHEAMPONG MICHAEL APPIAH	Male	2	1	4	3	1
714	ANDERSON VIVIAN	Female	2	1	4	3	1
715	ANKOMAH GEORGINA	Female	4	3	1	5	3
716	ANNANG FRANCISCA TORSHIE	Female	2	1	4	3	1
717	ACQUAH BENJAMIN	Male	5	4	3	2	1
718	ANNOR RICHAEL	Female	5	4	3	2	5
719	ANSAH FAUSTINA	Female	3	4	5	1	4
720	ANSAH MARFO DOREEN	Female	2	1	1	2	3
721	ACQUAH KINGSLEY OCANSEY	Male	1	2	3	4	5
722	ANTHONIO HENRIETTA	Female	1	2	3	4	5
723	APPIAH ISAAC	Male	3	4	5	1	2
724	APPIAH MOSES	Male	1	2	3	4	5
725	ACQUAH PHILIP	Male	1	2	3	4	5
726	APPIAH PRINCE KWESI	Male	5	2	3	4	5
727	ARKO HAGAR	Female	4	1	5	4	3
728	ARKOH GALAHAD AHINSAH	Female	3	2	1	1	2
729	ADAM HALIMATU SADIA	Female	5	4	3	2	1
730	ARTHUR EBENEZER	Male	5	4	3	2	1
731	ARTHUR ESSUMAN JAMES	Male	2	1	5	4	3
732	ARYEETEY MESHACK	Male	5	4	3	2	1
733	ADAMA-TETTEY MARYNSKY	Female	2	1	4	3	1
734	ASABIRE SOPHIA	Female	2	5	4	3	5
735	ASAHENE EMMANUELLA	Female	1	4	4	5	4
736	ASAMANY CARL	Male	2	3	1	1	3
737	ADAMS AFISHETU	Female	4	5	2	3	5
738	ASAMOAH MERCY	Female	4	5	2	3	5
739	ASARE ERIC AGYIRI AWERE	Male	1	2	4	5	2
740	ASHITEY MCZILL HAFIZ OKO	Male	4	5	2	3	5
741	ADAMS ANASS	Male	4	5	2	3	5
742	ASIEDU MAVIS	Female	4	5	2	3	5
743	ATIEMO JOSEPHINE	Female	4	3	1	5	3
744	AWUDER WILLIAM YAO	Male	1	2	2	1	2
745	ADARKWAH IRENE	Female	2	1	4	3	1
746	AYER PERCY OKAI	Male	2	1	4	3	1
747	AYISI BENJAMIN	Male	4	3	1	5	3
748	AZAMETSI MIRABLE	Female	2	1	4	3	1
749	ADDAE PORTIA	Female	4	5	2	3	5
750	BEDIAKO PRISCILLA ODURO	Female	4	5	2	3	5
751	BELLEY BETTY	Female	4	3	1	5	3
752	BOATEMAA SLYVIA	Female	1	2	2	1	2
753	ADDEY AUGUSTINE	Male	2	1	4	3	1
754	BOATENG ABRAHAM AMEGAVIE	Male	2	1	4	3	1
755	BONDZIE SAMUEL AIDOO	Male	4	3	1	5	3
756	BONI MAXWELL EDEM	Male	2	1	4	3	1
757	ADDICO FRANCIS AWULEY	Male	5	4	3	2	1
758	BOTCHWAY HANNAH	Female	5	4	3	2	5
759	BOTCHWAY JEMIMA ATSWEI	Female	3	4	5	1	4
760	BOTCHWAY MICHAEL	Male	2	1	1	2	3
761	ADDISON EMMANUEL	Male	1	2	3	4	5
762	BOYETEY SOLOMON BUERNOR	Male	1	2	3	4	5
763	BRENYAH SYLVESTER	Male	3	4	5	1	2
764	CLELAND VERA VASTU	Female	1	2	3	4	5
765	ADDISON STEPHEN EBO	Male	1	2	3	4	5
766	DADZIE ISAAC	Male	5	2	3	4	5
767	DAMALIE DEBORAH YAYRA	Female	4	1	5	4	3
768	DARKO MOSES	Male	3	2	1	1	2
769	ADDO NAOMI	Female	5	4	3	2	1
770	DARKOA DORA	Female	5	4	3	2	1
771	DENTAAH AMPOFO PATIENCE O.	Female	2	1	5	4	3
772	DJIDONU DANIEL KWESI	Male	5	4	3	2	1
773	ADDO PATIENCE	Female	2	1	4	3	1
774	DOE KENNEDY	Male	2	5	4	3	5
775	DOKU ESTHER MAKU	Female	1	4	4	5	4
776	DOWUONA PRISCILLA NORKAI	Female	2	3	1	1	3
777	ADDY MELIORA GENEVIEVE	Female	4	5	2	3	5
778	DZRAMADO SANDRA	Female	4	5	2	3	5
779	DZUFLE BRIDGET	Female	1	2	4	5	2
780	EDZEOU BERNARD	Male	4	5	2	3	5
781	ADEKPUITOR PETER	Male	4	5	2	3	5
782	ENTSIEH EVANS	Male	4	5	2	3	5
783	FOMETU GLADYS COURINE	Female	4	3	1	5	3
784	GANYO REBECCA EYRAM	Female	1	2	2	1	2
785	ADEKU CALEB KOJO	Male	2	1	4	3	1
786	GBADGO CHARLOTTE	Female	2	1	4	3	1
787	GODOMEY ABRAHAM	Male	4	3	1	5	3
788	GYAN FELICIA	Female	2	1	4	3	1
789	ADETI CLIFFORD KWABLA	Male	4	5	2	3	5
790	GYAN MANTEY	Male	4	5	2	3	5
791	GYEKYE EMMANUEL	Male	4	3	1	5	3
792	HAGAN EDWIN EBOH	Male	1	2	2	1	2
793	ADINKRAH ABIGAIL	Female	2	1	4	3	1
794	HAMMOND NATHANIEL	Male	2	1	4	3	1
795	IBRAHIM MOHAMMED SANUSI	Male	4	3	1	5	3
796	IBRAHIM SEMIRATU	Female	2	1	4	3	1
797	ADIOK JOSHUA ALLEN	Male	1	2	3	4	5
798	INUSAH MOHAMMED	Male	1	2	3	4	5
799	KABAH ALIAYIRE ALEX	Male	3	4	5	1	2
800	KELVIN NKANSAH	Male	1	2	3	4	5
801	ADJAKLOE FLOSSIE DZIFA	Female	1	2	3	4	5
802	KUDJUH BRIGHT DOSU	Male	5	2	3	4	5
803	KUMI DANIEL DARKO	Male	4	1	5	4	3
804	KUMI MARY POKUAA	Female	3	2	1	1	2
805	ADJASOO LINDA SELINAM	Female	5	4	3	2	1
806	KUSI LYDIA ADJOA ADJEIWAA	Female	5	4	3	2	5
807	KWARTENG JESSE SARPONG	Male	3	4	5	1	4
808	LANTEI- LAMPTEY JESSE NII	Male	2	1	1	2	3
809	ADJEI - BAAH STEPHEN	Male	1	2	3	4	5
810	MASOPEH FELICIA VANILLA NAA AMELEY	Female	1	2	3	4	5
811	MENDS FIDELIA APPIAH	Female	3	4	5	1	2
812	MENSAH BETTY TELUS	Female	1	2	3	4	5
813	ADJEI BELINDA ADJETEY	Female	1	2	3	4	5
814	MENSAH CHARLES GYAMFI	Male	5	2	3	4	5
815	MENSAH PHILOMINA TECHIE	Female	4	1	5	4	3
816	MENYE GODWIN JR	Male	3	2	1	1	2
817	ADJEI DANIEL	Male	5	4	3	2	1
818	MOHAMMED ADAM ZAKIYU	Male	5	4	3	2	1
819	NARTEH GEOFFREY	Male	2	1	5	4	3
820	NKANSAH LOCTUS ADJEI	Female	5	4	3	2	1
821	ADJEI HENRY	Male	2	1	4	3	1
822	NORTEY NICHOLAS	Male	2	5	4	3	5
823	NUAMAH SAMUEL	Male	1	4	4	5	4
824	NUKPE DAVID CONVERY	Male	2	3	1	1	3
825	ADJEI JENNIFER ODUA	Female	4	5	2	3	5
826	NYARKO ANISA	Female	4	5	2	3	5
827	NYARKO NICHOLAS	Male	1	2	4	5	2
828	NYARKO WILLIAM KWABENA	Male	4	5	2	3	5
829	ADJEIBEA RACHEAL	Female	4	5	2	3	5
830	NYEDU ISHMAEL	Male	4	5	2	3	5
831	OBENG JULIANA	Female	4	3	1	5	3
832	OBUOBI SOLOMON	Male	1	2	2	1	2
833	ADJETEY ERAMI NII ADJEI	Male	2	1	4	3	1
834	ODOI ERIC AKO	Male	2	1	4	3	1
835	OFFEI OSEI FRANCIS	Male	4	3	1	5	3
836	OPOKU SAMUEL	Male	2	1	4	3	1
837	ADJIN-TETTEY JEREMIAH	Male	2	1	4	3	1
838	OPOKUA GIFTY NANA AMA	Female	2	1	4	3	1
839	OSEI RICHMOND KOFI	Male	4	3	1	5	3
840	OUEDORAOGO ROGER PETER	Male	2	1	4	3	1
841	ADJOKATSE BERNICE	Female	1	2	3	4	5
842	OWUSU ALEX	Male	1	2	3	4	5
843	OWUSU-APENTENG STEPHEN	Male	3	4	5	1	2
844	PARRY JESSICA	Male	1	2	3	4	5
845	ADOM JENNIFER ESTHER OHENEBA	Female	1	2	3	4	5
846	QUAICOE ENOCH	Male	5	2	3	4	5
847	QUANSAH BELINDA	Female	4	1	5	4	3
848	QUARTEY EVELYN NAA KWARLEY	Female	3	2	1	1	2
849	ADOM KWADWO BOAKYE	Male	5	4	3	2	1
850	QUARTEY SALOMEY	Female	5	4	3	2	5
851	SAHEED AZEEZAT	Female	3	4	5	1	4
852	SHAIBU FAUZIYATU	Female	2	1	1	2	3
853	ADU BONA SUSANNA	Female	1	2	3	4	5
854	SOWAH ALEXANDRA ENYONAM	Female	1	2	3	4	5
855	SULLEY HINDU MUNIRU	Female	3	4	5	1	2
856	TAGOE DAVID	Male	1	2	3	4	5
857	ADU DORA	Female	1	2	3	4	5
858	TAWIAH ADAMA OKOE	Male	5	2	3	4	5
859	TETTEH KELVIN	Male	4	1	5	4	3
860	TETTEH MALVIN	Male	3	2	1	1	2
861	ADU PRISCILLA NKETIA	Female	5	4	3	2	1
862	WADIE LINDA NKANSAH	Female	5	4	3	2	1
863	WENOMA LINDA	Female	2	1	5	4	3
864	YARTEY SEFIATU	Female	5	4	3	2	1
865	ADU-AGYEI AWURA AKUA	Female	2	1	4	3	1
866	OWUSU ALEX	Male	2	5	4	3	5
867	OWUSU-APENTENG STEPHEN	Male	1	4	4	5	4
868	PARRY JESSICA	Male	2	3	1	1	3
869	ADU-TWUM FREDERICK ASANTE	Male	4	5	2	3	5
870	QUAICOE ENOCH	Male	4	5	2	3	5
871	QUANSAH BELINDA	Female	1	2	4	5	2
872	QUARTEY EVELYN NAA KWARLEY	Female	4	5	2	3	5
873	ADUSEI GIFTY YEBOAH	Female	4	5	2	3	5
874	QUARTEY SALOMEY	Female	4	5	2	3	5
875	SAHEED AZEEZAT	Female	4	3	1	5	3
876	SHAIBU FAUZIYATU	Female	1	2	2	1	2
877	ADUUM REBECCA	Female	2	1	4	3	1
878	AFARI STEPHEN	Male	2	1	4	3	1
879	AFOTEY PATRICK DUNYO	Male	4	3	1	5	3
880	AFRAH TRACY NTOW	Female	2	1	4	3	1
881	ABABIO ABEDNEGO A.	Male	2	1	4	3	1
882	ABOAGYE ELIZABETH BOADIWAA	Female	2	1	4	3	1
883	ABOE ANDREWS	Male	4	3	1	5	3
884	ABRAHAM-QUANSAH MARY EVA	Female	2	1	4	3	1
885	ABALEM JENNIFER	Female	1	2	3	4	5
886	ADDAE SANDRA	Female	1	2	3	4	5
887	ADJEI FREDERICK YAW	Male	3	4	5	1	2
888	ADJEI PRINCE BAFFOUR	Male	1	2	3	4	5
889	ABBAN VIDA OWUSU	Female	1	2	3	4	5
890	ADJEI SAMUEL	Male	5	2	3	4	5
891	ADJORLOLO MERCY NORKPLIM	Female	4	1	5	4	3
892	ADOCTOR VICTORIA	Female	3	2	1	1	2
893	ADU AFRIYIE	Male	5	4	3	2	1
894	ADU EMMANUEL	Male	5	4	3	2	5
895	ADZOWU MILLICENT	Female	3	4	5	1	4
896	AFORDE JAMES ABLORDE	Male	2	1	1	2	3
897	ABDALLAH FATIMATU	Female	1	2	3	4	5
898	AGBENYEGA STEPHEN	Male	1	2	3	4	5
899	AGBOGBA LANDRY KWAME	Male	3	4	5	1	2
900	AGGERH BARNABAS KOBBY	Male	1	2	3	4	5
901	ABDULAI FAIZA	Female	1	2	3	4	5
902	AGOE JEHOSHAPHAT SOWAH	Male	5	2	3	4	5
903	AGUDA NARKIE PATRICIA	Female	4	1	5	4	3
904	AGYARE PRISCILLA DARFOUR	Female	3	2	1	1	2
905	ABEKAH EMMANUEL	Male	5	4	3	2	1
906	AGYEI RICHARD KWAME	Male	5	4	3	2	1
907	AGYEMAN DUAH BOATEMAA	Female	2	1	5	4	3
908	AGYEMAN PAUL BOAKYE	Male	5	4	3	2	1
909	ABOAGYE DAVID ADU	Male	2	1	4	3	1
910	AGYIRI GEORGINA	Female	2	5	4	3	5
911	AHIABLEY PORTIA	Female	1	4	4	5	4
912	AHONI MAUDLIN AYONGO	Female	2	3	1	1	3
913	ABOAGYE FELIX	Male	4	5	2	3	5
914	AKAGBO REBECCA	Female	4	5	2	3	5
915	AKOTO REINDOLF APPIAH	Male	1	2	4	5	2
916	AKUFFO GIDEON	Male	4	5	2	3	5
917	ABU ABDUL MANAF	Male	4	5	2	3	5
918	ALAGBO EMMANUEL	Male	4	5	2	3	5
919	ALLOTEY KPAKPO VINCENT	Male	4	3	1	5	3
920	ALLOTEY PEARL NAA AKU	Female	1	2	2	1	2
921	ABUBAKAR ARAFAT SUFYAN	Male	2	1	4	3	1
922	AMAKYE JAMES SARPONG	Male	2	1	4	3	1
923	AMEVOR ERIC	Male	4	3	1	5	3
924	AMOAH CHARLOTTE KORKOR	Female	2	1	4	3	1
925	ACHEAMPONG CHRISTABEL	Female	2	1	4	3	1
926	AMOAH MILDRED	Female	2	1	4	3	1
927	AMOAKO ERNESTINA OPOKUA	Female	4	3	1	5	3
928	AMPONSAH CECILIA ABENA	Female	2	1	4	3	1
929	ACHEAMPONG KINGSLEY	Male	1	2	3	4	5
930	AMUZU STELLA KABUKI	Female	1	2	3	4	5
931	ANABI MUSAH AHMED	Male	3	4	5	1	2
932	ANDERSON GIFTY	Female	1	2	3	4	5
933	ACHEAMPONG MICHAEL APPIAH	Male	1	2	3	4	5
934	ANDERSON VIVIAN	Female	5	2	3	4	5
935	ANKOMAH GEORGINA	Female	4	1	5	4	3
936	ANNANG FRANCISCA TORSHIE	Female	3	2	1	1	2
937	ACQUAH BENJAMIN	Male	5	4	3	2	1
938	ANNOR RICHAEL	Female	5	4	3	2	5
939	ANSAH FAUSTINA	Female	3	4	5	1	4
940	ANSAH MARFO DOREEN	Female	2	1	1	2	3
941	ACQUAH KINGSLEY OCANSEY	Male	1	2	3	4	5
942	ANTHONIO HENRIETTA	Female	1	2	3	4	5
943	APPIAH ISAAC	Male	3	4	5	1	2
944	APPIAH MOSES	Male	1	2	3	4	5
945	ACQUAH PHILIP	Male	1	2	3	4	5
946	APPIAH PRINCE KWESI	Male	5	2	3	4	5
947	ARKO HAGAR	Female	4	1	5	4	3
948	ARKOH GALAHAD AHINSAH	Female	3	2	1	1	2
949	ADAM HALIMATU SADIA	Female	5	4	3	2	1
950	ARTHUR EBENEZER	Male	5	4	3	2	1
951	ARTHUR ESSUMAN JAMES	Male	2	1	5	4	3
952	ARYEETEY MESHACK	Male	5	4	3	2	1
953	ADAMA-TETTEY MARYNSKY	Female	2	1	4	3	1
954	ASABIRE SOPHIA	Female	2	5	4	3	5
955	ASAHENE EMMANUELLA	Female	1	4	4	5	4
956	ASAMANY CARL	Male	2	3	1	1	3
957	ADAMS AFISHETU	Female	4	5	2	3	5
958	ASAMOAH MERCY	Female	4	5	2	3	5
959	ASARE ERIC AGYIRI AWERE	Male	1	2	4	5	2
960	ASHITEY MCZILL HAFIZ OKO	Male	4	5	2	3	5
961	ADAMS ANASS	Male	4	5	2	3	5
962	ASIEDU MAVIS	Female	4	5	2	3	5
963	ATIEMO JOSEPHINE	Female	4	3	1	5	3
964	AWUDER WILLIAM YAO	Male	1	2	2	1	2
965	ADARKWAH IRENE	Female	2	1	4	3	1
966	AYER PERCY OKAI	Male	2	1	4	3	1
967	AYISI BENJAMIN	Male	4	3	1	5	3
968	AZAMETSI MIRABLE	Female	2	1	4	3	1
969	ADDAE PORTIA	Female	5	4	3	2	1
970	BEDIAKO PRISCILLA ODURO	Female	5	4	3	2	5
971	BELLEY BETTY	Female	3	4	5	1	4
972	BOATEMAA SLYVIA	Female	2	1	1	2	3
973	ADDEY AUGUSTINE	Male	1	2	3	4	5
974	BOATENG ABRAHAM AMEGAVIE	Male	1	2	3	4	5
975	BONDZIE SAMUEL AIDOO	Male	3	4	5	1	2
976	BONI MAXWELL EDEM	Male	1	2	3	4	5
977	ADDICO FRANCIS AWULEY	Male	1	2	3	4	5
978	BOTCHWAY HANNAH	Female	5	2	3	4	5
979	BOTCHWAY JEMIMA ATSWEI	Female	4	1	5	4	3
980	BOTCHWAY MICHAEL	Male	3	2	1	1	2
981	ADDISON EMMANUEL	Male	5	4	3	2	1
982	BOYETEY SOLOMON BUERNOR	Male	5	4	3	2	1
983	BRENYAH SYLVESTER	Male	2	1	5	4	3
984	CLELAND VERA VASTU	Female	5	4	3	2	1
985	ADDISON STEPHEN EBO	Male	2	1	4	3	1
986	DADZIE ISAAC	Male	2	5	4	3	5
987	DAMALIE DEBORAH YAYRA	Female	1	4	4	5	4
988	DARKO MOSES	Male	2	3	1	1	3
989	ADDO NAOMI	Female	4	5	2	3	5
990	DARKOA DORA	Female	4	5	2	3	5
991	DENTAAH AMPOFO PATIENCE O.	Female	1	2	4	5	2
992	DJIDONU DANIEL KWESI	Male	4	5	2	3	5
993	ADDO PATIENCE	Female	4	5	2	3	5
994	DOE KENNEDY	Male	4	5	2	3	5
995	DOKU ESTHER MAKU	Female	4	3	1	5	3
996	DOWUONA PRISCILLA NORKAI	Female	1	2	2	1	2
997	ADDY MELIORA GENEVIEVE	Female	2	1	4	3	1
998	DZRAMADO SANDRA	Female	2	1	4	3	1
999	DZUFLE BRIDGET	Female	4	3	1	5	3
1000	EDZEOU BERNARD	Male	2	1	4	3	1
1001	ADEKPUITOR PETER	Male	4	5	2	3	5
1002	ENTSIEH EVANS	Male	4	5	2	3	5
1003	FOMETU GLADYS COURINE	Female	4	3	1	5	3
1004	GANYO REBECCA EYRAM	Female	1	2	2	1	2
1005	ADEKU CALEB KOJO	Male	2	1	4	3	1
1006	GBADGO CHARLOTTE	Female	2	1	4	3	1
1007	GODOMEY ABRAHAM	Male	4	3	1	5	3
1008	GYAN FELICIA	Female	2	1	4	3	1
1009	ADETI CLIFFORD KWABLA	Male	5	4	3	2	1
1010	GYAN MANTEY	Male	5	4	3	2	5
1011	GYEKYE EMMANUEL	Male	3	4	5	1	4
1012	HAGAN EDWIN EBOH	Male	2	1	1	2	3
1013	ADINKRAH ABIGAIL	Female	1	2	3	4	5
1014	HAMMOND NATHANIEL	Male	1	2	3	4	5
1015	IBRAHIM MOHAMMED SANUSI	Male	3	4	5	1	2
1016	IBRAHIM SEMIRATU	Female	1	2	3	4	5
1017	ADIOK JOSHUA ALLEN	Male	1	2	3	4	5
1018	INUSAH MOHAMMED	Male	5	2	3	4	5
1019	KABAH ALIAYIRE ALEX	Male	4	1	5	4	3
1020	KELVIN NKANSAH	Male	3	2	1	1	2
1021	ADJAKLOE FLOSSIE DZIFA	Female	5	4	3	2	1
1022	KUDJUH BRIGHT DOSU	Male	5	4	3	2	1
1023	KUMI DANIEL DARKO	Male	2	1	5	4	3
1024	KUMI MARY POKUAA	Female	5	4	3	2	1
1025	ADJASOO LINDA SELINAM	Female	2	1	4	3	1
1026	KUSI LYDIA ADJOA ADJEIWAA	Female	2	5	4	3	5
1027	KWARTENG JESSE SARPONG	Male	1	4	4	5	4
1028	LANTEI- LAMPTEY JESSE NII	Male	2	3	1	1	3
1029	ADJEI - BAAH STEPHEN	Male	4	5	2	3	5
1030	MASOPEH FELICIA VANILLA NAA AMELEY	Female	4	5	2	3	5
1031	MENDS FIDELIA APPIAH	Female	1	2	4	5	2
1032	MENSAH BETTY TELUS	Female	4	5	2	3	5
1033	ADJEI BELINDA ADJETEY	Female	4	5	2	3	5
1034	MENSAH CHARLES GYAMFI	Male	4	5	2	3	5
1035	MENSAH PHILOMINA TECHIE	Female	4	3	1	5	3
1036	MENYE GODWIN JR	Male	1	2	2	1	2
1037	ADJEI DANIEL	Male	2	1	4	3	1
1038	MOHAMMED ADAM ZAKIYU	Male	2	1	4	3	1
1039	NARTEH GEOFFREY	Male	4	3	1	5	3
1040	NKANSAH LOCTUS ADJEI	Female	2	1	4	3	1
1041	ADJEI HENRY	Male	4	5	2	3	5
1042	NORTEY NICHOLAS	Male	4	5	2	3	5
1043	NUAMAH SAMUEL	Male	4	3	1	5	3
1044	NUKPE DAVID CONVERY	Male	1	2	2	1	2
1045	ADJEI JENNIFER ODUA	Female	2	1	4	3	1
1046	NYARKO ANISA	Female	2	1	4	3	1
1047	NYARKO NICHOLAS	Male	4	3	1	5	3
1048	NYARKO WILLIAM KWABENA	Male	2	1	4	3	1
1049	ADJEIBEA RACHEAL	Female	1	2	3	4	5
1050	NYEDU ISHMAEL	Male	1	2	3	4	5
1051	OBENG JULIANA	Female	3	4	5	1	2
1052	OBUOBI SOLOMON	Male	1	2	3	4	5
1053	ADJETEY ERAMI NII ADJEI	Male	1	2	3	4	5
1054	ODOI ERIC AKO	Male	5	2	3	4	5
1055	OFFEI OSEI FRANCIS	Male	4	1	5	4	3
1056	OPOKU SAMUEL	Male	3	2	1	1	2
1057	ADJIN-TETTEY JEREMIAH	Male	5	4	3	2	1
1058	OPOKUA GIFTY NANA AMA	Female	5	4	3	2	5
1059	OSEI RICHMOND KOFI	Male	3	4	5	1	4
1060	OUEDORAOGO ROGER PETER	Male	2	1	1	2	3
1061	ADJOKATSE BERNICE	Female	1	2	3	4	5
1062	OWUSU ALEX	Male	1	2	3	4	5
1063	OWUSU-APENTENG STEPHEN	Male	3	4	5	1	2
1064	PARRY JESSICA	Male	1	2	3	4	5
1065	ADOM JENNIFER ESTHER OHENEBA	Female	1	2	3	4	5
1066	QUAICOE ENOCH	Male	5	2	3	4	5
1067	QUANSAH BELINDA	Female	4	1	5	4	3
1068	QUARTEY EVELYN NAA KWARLEY	Female	3	2	1	1	2
1069	ADOM KWADWO BOAKYE	Male	5	4	3	2	1
1070	QUARTEY SALOMEY	Female	5	4	3	2	1
1071	SAHEED AZEEZAT	Female	2	1	5	4	3
1072	SHAIBU FAUZIYATU	Female	5	4	3	2	1
1073	ADU BONA SUSANNA	Female	2	1	4	3	1
1074	SOWAH ALEXANDRA ENYONAM	Female	2	5	4	3	5
1075	SULLEY HINDU MUNIRU	Female	1	4	4	5	4
1076	TAGOE DAVID	Male	2	3	1	1	3
1077	ADU DORA	Female	4	5	2	3	5
1078	TAWIAH ADAMA OKOE	Male	4	5	2	3	5
1079	TETTEH KELVIN	Male	1	2	4	5	2
1080	TETTEH MALVIN	Male	4	5	2	3	5
1081	ADU PRISCILLA NKETIA	Female	4	5	2	3	5
1082	WADIE LINDA NKANSAH	Female	4	5	2	3	5
1083	WENOMA LINDA	Female	4	3	1	5	3
1084	YARTEY SEFIATU	Female	1	2	2	1	2
1085	ADU-AGYEI AWURA AKUA	Female	2	1	4	3	1
1086	OWUSU ALEX	Male	2	1	4	3	1
1087	OWUSU-APENTENG STEPHEN	Male	4	3	1	5	3
1088	PARRY JESSICA	Male	2	1	4	3	1
1089	ADU-TWUM FREDERICK ASANTE	Male	2	1	4	3	1
1090	QUAICOE ENOCH	Male	2	1	4	3	1
1091	QUANSAH BELINDA	Female	4	3	1	5	3
1092	QUARTEY EVELYN NAA KWARLEY	Female	2	1	4	3	1
1093	ADUSEI GIFTY YEBOAH	Female	1	2	3	4	5
1094	QUARTEY SALOMEY	Female	1	2	3	4	5
1095	SAHEED AZEEZAT	Female	3	4	5	1	2
1096	SHAIBU FAUZIYATU	Female	1	2	3	4	5
1097	ADUUM REBECCA	Female	1	2	3	4	5
1098	AFARI STEPHEN	Male	5	2	3	4	5
1099	AFOTEY PATRICK DUNYO	Male	4	1	5	4	3
1100	AFRAH TRACY NTOW	Female	3	2	1	1	2
1101	ABABIO ABEDNEGO A.	Male	5	4	3	2	1
1102	ABOAGYE ELIZABETH BOADIWAA	Female	5	4	3	2	5
1103	ABOE ANDREWS	Male	3	4	5	1	4
1104	ABRAHAM-QUANSAH MARY EVA	Female	2	1	1	2	3
1105	ABALEM JENNIFER	Female	1	2	3	4	5
1106	ADDAE SANDRA	Female	1	2	3	4	5
1107	ADJEI FREDERICK YAW	Male	3	4	5	1	2
1108	ADJEI PRINCE BAFFOUR	Male	1	2	3	4	5
1109	ABBAN VIDA OWUSU	Female	1	2	3	4	5
1110	ADJEI SAMUEL	Male	5	2	3	4	5
1111	ADJORLOLO MERCY NORKPLIM	Female	4	1	5	4	3
1112	ADOCTOR VICTORIA	Female	3	2	1	1	2
1113	ADU AFRIYIE	Male	5	4	3	2	1
1114	ADU EMMANUEL	Male	5	4	3	2	1
1115	ADZOWU MILLICENT	Female	2	1	5	4	3
1116	AFORDE JAMES ABLORDE	Male	5	4	3	2	1
1117	ABDALLAH FATIMATU	Female	2	1	4	3	1
1118	AGBENYEGA STEPHEN	Male	2	5	4	3	5
1119	AGBOGBA LANDRY KWAME	Male	1	4	4	5	4
1120	AGGERH BARNABAS KOBBY	Male	2	3	1	1	3
1121	ABDULAI FAIZA	Female	4	5	2	3	5
1122	AGOE JEHOSHAPHAT SOWAH	Male	4	5	2	3	5
1123	AGUDA NARKIE PATRICIA	Female	1	2	4	5	2
1124	AGYARE PRISCILLA DARFOUR	Female	4	5	2	3	5
1125	ABEKAH EMMANUEL	Male	4	5	2	3	5
1126	AGYEI RICHARD KWAME	Male	4	5	2	3	5
1127	AGYEMAN DUAH BOATEMAA	Female	4	3	1	5	3
1128	AGYEMAN PAUL BOAKYE	Male	1	2	2	1	2
1129	ABOAGYE DAVID ADU	Male	2	1	4	3	1
1130	AGYIRI GEORGINA	Female	2	1	4	3	1
1131	AHIABLEY PORTIA	Female	4	3	1	5	3
1132	AHONI MAUDLIN AYONGO	Female	2	1	4	3	1
1133	ABOAGYE FELIX	Male	2	1	4	3	1
1134	AKAGBO REBECCA	Female	2	1	4	3	1
1135	AKOTO REINDOLF APPIAH	Male	4	3	1	5	3
1136	AKUFFO GIDEON	Male	2	1	4	3	1
1137	ABU ABDUL MANAF	Male	1	2	3	4	5
1138	ALAGBO EMMANUEL	Male	1	2	3	4	5
1139	ALLOTEY KPAKPO VINCENT	Male	3	4	5	1	2
1140	ALLOTEY PEARL NAA AKU	Female	1	2	3	4	5
1141	ABUBAKAR ARAFAT SUFYAN	Male	1	2	3	4	5
1142	AMAKYE JAMES SARPONG	Male	5	2	3	4	5
1143	AMEVOR ERIC	Male	4	1	5	4	3
1144	AMOAH CHARLOTTE KORKOR	Female	3	2	1	1	2
1145	ACHEAMPONG CHRISTABEL	Female	5	4	3	2	1
1146	AMOAH MILDRED	Female	5	4	3	2	5
1147	AMOAKO ERNESTINA OPOKUA	Female	3	4	5	1	4
1148	AMPONSAH CECILIA ABENA	Female	2	1	1	2	3
1149	ACHEAMPONG KINGSLEY	Male	1	2	3	4	5
1150	AMUZU STELLA KABUKI	Female	1	2	3	4	5
1151	ANABI MUSAH AHMED	Male	3	4	5	1	2
1152	ANDERSON GIFTY	Female	1	2	3	4	5
1153	ACHEAMPONG MICHAEL APPIAH	Male	1	2	3	4	5
1154	ANDERSON VIVIAN	Female	5	2	3	4	5
1155	ANKOMAH GEORGINA	Female	4	1	5	4	3
1156	ANNANG FRANCISCA TORSHIE	Female	3	2	1	1	2
1157	ACQUAH BENJAMIN	Male	5	4	3	2	1
1158	ANNOR RICHAEL	Female	5	4	3	2	1
1159	ANSAH FAUSTINA	Female	2	1	5	4	3
1160	ANSAH MARFO DOREEN	Female	5	4	3	2	1
1161	ACQUAH KINGSLEY OCANSEY	Male	2	1	4	3	1
1162	ANTHONIO HENRIETTA	Female	2	5	4	3	5
1163	APPIAH ISAAC	Male	1	4	4	5	4
1164	APPIAH MOSES	Male	2	3	1	1	3
1165	ACQUAH PHILIP	Male	4	5	2	3	5
1166	APPIAH PRINCE KWESI	Male	4	5	2	3	5
1167	ARKO HAGAR	Female	1	2	4	5	2
1168	ARKOH GALAHAD AHINSAH	Female	4	5	2	3	5
1169	ADAM HALIMATU SADIA	Female	4	5	2	3	5
1170	ARTHUR EBENEZER	Male	4	5	2	3	5
1171	ARTHUR ESSUMAN JAMES	Male	4	3	1	5	3
1172	ARYEETEY MESHACK	Male	1	2	2	1	2
1173	ADAMA-TETTEY MARYNSKY	Female	2	1	4	3	1
1174	ASABIRE SOPHIA	Female	2	1	4	3	1
1175	ASAHENE EMMANUELLA	Female	4	3	1	5	3
1176	ASAMANY CARL	Male	2	1	4	3	1
1177	ADAMS AFISHETU	Female	2	1	4	3	1
1178	ASAMOAH MERCY	Female	2	1	4	3	1
1179	ASARE ERIC AGYIRI AWERE	Male	4	3	1	5	3
1180	ASHITEY MCZILL HAFIZ OKO	Male	2	1	4	3	1
1181	ADAMS ANASS	Male	1	2	3	4	5
1182	ASIEDU MAVIS	Female	1	2	3	4	5
1183	ATIEMO JOSEPHINE	Female	3	4	5	1	2
1184	AWUDER WILLIAM YAO	Male	1	2	3	4	5
1185	ADARKWAH IRENE	Female	1	2	3	4	5
1186	AYER PERCY OKAI	Male	5	2	3	4	5
1187	AYISI BENJAMIN	Male	4	1	5	4	3
1188	AZAMETSI MIRABLE	Female	3	2	1	1	2
1189	ADDAE PORTIA	Female	5	4	3	2	1
1190	BEDIAKO PRISCILLA ODURO	Female	5	4	3	2	5
1191	BELLEY BETTY	Female	3	4	5	1	4
1192	BOATEMAA SLYVIA	Female	2	1	1	2	3
1193	ADDEY AUGUSTINE	Male	1	2	3	4	5
1194	BOATENG ABRAHAM AMEGAVIE	Male	1	2	3	4	5
1195	BONDZIE SAMUEL AIDOO	Male	3	4	5	1	2
1196	BONI MAXWELL EDEM	Male	1	2	3	4	5
1197	ADDICO FRANCIS AWULEY	Male	1	2	3	4	5
1198	BOTCHWAY HANNAH	Female	5	2	3	4	5
1199	BOTCHWAY JEMIMA ATSWEI	Female	4	1	5	4	3
1200	BOTCHWAY MICHAEL	Male	3	2	1	1	2
1201	ADDISON EMMANUEL	Male	5	4	3	2	1
1202	BOYETEY SOLOMON BUERNOR	Male	5	4	3	2	1
1203	BRENYAH SYLVESTER	Male	2	1	5	4	3
1204	CLELAND VERA VASTU	Female	5	4	3	2	1
1205	ADDISON STEPHEN EBO	Male	2	1	4	3	1
1206	DADZIE ISAAC	Male	2	5	4	3	5
1207	DAMALIE DEBORAH YAYRA	Female	1	4	4	5	4
1208	DARKO MOSES	Male	2	3	1	1	3
1209	ADDO NAOMI	Female	4	5	2	3	5
1210	DARKOA DORA	Female	4	5	2	3	5
1211	DENTAAH AMPOFO PATIENCE O.	Female	1	2	4	5	2
1212	DJIDONU DANIEL KWESI	Male	4	5	2	3	5
1213	ADDO PATIENCE	Female	4	5	2	3	5
1214	DOE KENNEDY	Male	4	5	2	3	5
1215	DOKU ESTHER MAKU	Female	4	3	1	5	3
1216	DOWUONA PRISCILLA NORKAI	Female	1	2	2	1	2
1217	ADDY MELIORA GENEVIEVE	Female	2	1	4	3	1
1218	DZRAMADO SANDRA	Female	2	1	4	3	1
1219	DZUFLE BRIDGET	Female	4	3	1	5	3
1220	EDZEOU BERNARD	Male	2	1	4	3	1
1221	ADEKPUITOR PETER	Male	5	4	3	2	1
1222	ENTSIEH EVANS	Male	5	4	3	2	5
1223	FOMETU GLADYS COURINE	Female	3	4	5	1	4
1224	GANYO REBECCA EYRAM	Female	2	1	1	2	3
1225	ADEKU CALEB KOJO	Male	1	2	3	4	5
1226	GBADGO CHARLOTTE	Female	1	2	3	4	5
1227	GODOMEY ABRAHAM	Male	3	4	5	1	2
1228	GYAN FELICIA	Female	1	2	3	4	5
1229	ADETI CLIFFORD KWABLA	Male	1	2	3	4	5
1230	GYAN MANTEY	Male	5	2	3	4	5
1231	GYEKYE EMMANUEL	Male	4	1	5	4	3
1232	HAGAN EDWIN EBOH	Male	3	2	1	1	2
1233	ADINKRAH ABIGAIL	Female	5	4	3	2	1
1234	HAMMOND NATHANIEL	Male	5	4	3	2	1
1235	IBRAHIM MOHAMMED SANUSI	Male	2	1	5	4	3
1236	IBRAHIM SEMIRATU	Female	5	4	3	2	1
1237	ADIOK JOSHUA ALLEN	Male	2	1	4	3	1
1238	INUSAH MOHAMMED	Male	2	5	4	3	5
1239	KABAH ALIAYIRE ALEX	Male	1	4	4	5	4
1240	KELVIN NKANSAH	Male	2	3	1	1	3
1241	ADJAKLOE FLOSSIE DZIFA	Female	4	5	2	3	5
1242	KUDJUH BRIGHT DOSU	Male	4	5	2	3	5
1243	KUMI DANIEL DARKO	Male	1	2	4	5	2
1244	KUMI MARY POKUAA	Female	4	5	2	3	5
1245	ADJASOO LINDA SELINAM	Female	4	5	2	3	5
1246	KUSI LYDIA ADJOA ADJEIWAA	Female	4	5	2	3	5
1247	KWARTENG JESSE SARPONG	Male	4	3	1	5	3
1248	LANTEI- LAMPTEY JESSE NII	Male	1	2	2	1	2
1249	ADJEI - BAAH STEPHEN	Male	2	1	4	3	1
1250	MASOPEH FELICIA VANILLA NAA AMELEY	Female	2	1	4	3	1
1251	MENDS FIDELIA APPIAH	Female	4	3	1	5	3
1252	MENSAH BETTY TELUS	Female	2	1	4	3	1
1253	ADJEI BELINDA ADJETEY	Female	4	5	2	3	5
1254	MENSAH CHARLES GYAMFI	Male	4	5	2	3	5
1255	MENSAH PHILOMINA TECHIE	Female	4	3	1	5	3
1256	MENYE GODWIN JR	Male	1	2	2	1	2
1257	ADJEI DANIEL	Male	2	1	4	3	1
1258	MOHAMMED ADAM ZAKIYU	Male	2	1	4	3	1
1259	NARTEH GEOFFREY	Male	4	3	1	5	3
1260	NKANSAH LOCTUS ADJEI	Female	2	1	4	3	1
1261	ADJEI HENRY	Male	5	4	3	2	1
1262	NORTEY NICHOLAS	Male	5	4	3	2	5
1263	NUAMAH SAMUEL	Male	3	4	5	1	4
1264	NUKPE DAVID CONVERY	Male	2	1	1	2	3
1265	ADJEI JENNIFER ODUA	Female	1	2	3	4	5
1266	NYARKO ANISA	Female	1	2	3	4	5
1267	NYARKO NICHOLAS	Male	3	4	5	1	2
1268	NYARKO WILLIAM KWABENA	Male	1	2	3	4	5
1269	ADJEIBEA RACHEAL	Female	1	2	3	4	5
1270	NYEDU ISHMAEL	Male	5	2	3	4	5
1271	OBENG JULIANA	Female	4	1	5	4	3
1272	OBUOBI SOLOMON	Male	3	2	1	1	2
1273	ADJETEY ERAMI NII ADJEI	Male	5	4	3	2	1
1274	ODOI ERIC AKO	Male	5	4	3	2	1
1275	OFFEI OSEI FRANCIS	Male	2	1	5	4	3
1276	OPOKU SAMUEL	Male	5	4	3	2	1
1277	ADJIN-TETTEY JEREMIAH	Male	2	1	4	3	1
1278	OPOKUA GIFTY NANA AMA	Female	2	5	4	3	5
1279	OSEI RICHMOND KOFI	Male	1	4	4	5	4
1280	OUEDORAOGO ROGER PETER	Male	2	3	1	1	3
1281	ADJOKATSE BERNICE	Female	4	5	2	3	5
1282	OWUSU ALEX	Male	4	5	2	3	5
1283	OWUSU-APENTENG STEPHEN	Male	1	2	4	5	2
1284	PARRY JESSICA	Male	4	5	2	3	5
1285	ADOM JENNIFER ESTHER OHENEBA	Female	4	5	2	3	5
1286	QUAICOE ENOCH	Male	4	5	2	3	5
1287	QUANSAH BELINDA	Female	4	3	1	5	3
1288	QUARTEY EVELYN NAA KWARLEY	Female	1	2	2	1	2
1289	ADOM KWADWO BOAKYE	Male	2	1	4	3	1
1290	QUARTEY SALOMEY	Female	2	1	4	3	1
1291	SAHEED AZEEZAT	Female	4	3	1	5	3
1292	SHAIBU FAUZIYATU	Female	2	1	4	3	1
1293	ADU BONA SUSANNA	Female	4	5	2	3	5
1294	SOWAH ALEXANDRA ENYONAM	Female	4	5	2	3	5
1295	SULLEY HINDU MUNIRU	Female	4	3	1	5	3
1296	TAGOE DAVID	Male	1	2	2	1	2
1297	ADU DORA	Female	2	1	4	3	1
1298	TAWIAH ADAMA OKOE	Male	2	1	4	3	1
1299	TETTEH KELVIN	Male	4	3	1	5	3
1300	TETTEH MALVIN	Male	2	1	4	3	1
1301	ADU PRISCILLA NKETIA	Female	1	2	3	4	5
1302	WADIE LINDA NKANSAH	Female	1	2	3	4	5
1303	WENOMA LINDA	Female	3	4	5	1	2
1304	YARTEY SEFIATU	Female	1	2	3	4	5
1305	ADU-AGYEI AWURA AKUA	Female	1	2	3	4	5
1306	OWUSU ALEX	Male	5	2	3	4	5
1307	OWUSU-APENTENG STEPHEN	Male	4	1	5	4	3
1308	PARRY JESSICA	Male	3	2	1	1	2
1309	ADU-TWUM FREDERICK ASANTE	Male	5	4	3	2	1
1310	QUAICOE ENOCH	Male	5	4	3	2	5
1311	QUANSAH BELINDA	Female	3	4	5	1	4
1312	QUARTEY EVELYN NAA KWARLEY	Female	2	1	1	2	3
1313	ADUSEI GIFTY YEBOAH	Female	1	2	3	4	5
1314	QUARTEY SALOMEY	Female	1	2	3	4	5
1315	SAHEED AZEEZAT	Female	3	4	5	1	2
1316	SHAIBU FAUZIYATU	Female	1	2	3	4	5
1317	ADUUM REBECCA	Female	1	2	3	4	5
1318	AFARI STEPHEN	Male	5	2	3	4	5
1319	AFOTEY PATRICK DUNYO	Male	4	1	5	4	3
1320	AFRAH TRACY NTOW	Female	3	2	1	1	2
1321	ABABIO ABEDNEGO A.	Male	5	4	3	2	1
1322	ABOAGYE ELIZABETH BOADIWAA	Female	5	4	3	2	1
1323	ABOE ANDREWS	Male	2	1	5	4	3
1324	ABRAHAM-QUANSAH MARY EVA	Female	5	4	3	2	1
1325	ABALEM JENNIFER	Female	2	1	4	3	1
1326	ADDAE SANDRA	Female	2	5	4	3	5
1327	ADJEI FREDERICK YAW	Male	1	4	4	5	4
1328	ADJEI PRINCE BAFFOUR	Male	2	3	1	1	3
1329	ABBAN VIDA OWUSU	Female	4	5	2	3	5
1330	ADJEI SAMUEL	Male	4	5	2	3	5
1331	ADJORLOLO MERCY NORKPLIM	Female	1	2	4	5	2
1332	ADOCTOR VICTORIA	Female	4	5	2	3	5
1333	ADU AFRIYIE	Male	4	5	2	3	5
1334	ADU EMMANUEL	Male	4	5	2	3	5
1335	ADZOWU MILLICENT	Female	4	3	1	5	3
1336	AFORDE JAMES ABLORDE	Male	1	2	2	1	2
1337	ABDALLAH FATIMATU	Female	2	1	4	3	1
1338	AGBENYEGA STEPHEN	Male	2	1	4	3	1
1339	AGBOGBA LANDRY KWAME	Male	4	3	1	5	3
1340	AGGERH BARNABAS KOBBY	Male	2	1	4	3	1
1341	ABDULAI FAIZA	Female	2	1	4	3	1
1342	AGOE JEHOSHAPHAT SOWAH	Male	2	1	4	3	1
1343	AGUDA NARKIE PATRICIA	Female	4	3	1	5	3
1344	AGYARE PRISCILLA DARFOUR	Female	2	1	4	3	1
1345	ABEKAH EMMANUEL	Male	1	2	3	4	5
1346	AGYEI RICHARD KWAME	Male	1	2	3	4	5
1347	AGYEMAN DUAH BOATEMAA	Female	3	4	5	1	2
1348	AGYEMAN PAUL BOAKYE	Male	1	2	3	4	5
1349	ABOAGYE DAVID ADU	Male	1	2	3	4	5
1350	AGYIRI GEORGINA	Female	5	2	3	4	5
1351	AHIABLEY PORTIA	Female	4	1	5	4	3
1352	AHONI MAUDLIN AYONGO	Female	3	2	1	1	2
1353	ABOAGYE FELIX	Male	5	4	3	2	1
1354	AKAGBO REBECCA	Female	5	4	3	2	5
1355	AKOTO REINDOLF APPIAH	Male	3	4	5	1	4
1356	AKUFFO GIDEON	Male	2	1	1	2	3
1357	ABU ABDUL MANAF	Male	1	2	3	4	5
1358	ALAGBO EMMANUEL	Male	1	2	3	4	5
1359	ALLOTEY KPAKPO VINCENT	Male	3	4	5	1	2
1360	ALLOTEY PEARL NAA AKU	Female	1	2	3	4	5
1361	ABUBAKAR ARAFAT SUFYAN	Male	1	2	3	4	5
1362	AMAKYE JAMES SARPONG	Male	5	2	3	4	5
1363	AMEVOR ERIC	Male	4	1	5	4	3
1364	AMOAH CHARLOTTE KORKOR	Female	3	2	1	1	2
1365	ACHEAMPONG CHRISTABEL	Female	5	4	3	2	1
1366	AMOAH MILDRED	Female	5	4	3	2	1
1367	AMOAKO ERNESTINA OPOKUA	Female	2	1	5	4	3
1368	AMPONSAH CECILIA ABENA	Female	5	4	3	2	1
1369	ACHEAMPONG KINGSLEY	Male	2	1	4	3	1
1370	AMUZU STELLA KABUKI	Female	2	5	4	3	5
1371	ANABI MUSAH AHMED	Male	1	4	4	5	4
1372	ANDERSON GIFTY	Female	2	3	1	1	3
1373	ACHEAMPONG MICHAEL APPIAH	Male	4	5	2	3	5
1374	ANDERSON VIVIAN	Female	4	5	2	3	5
1375	ANKOMAH GEORGINA	Female	1	2	4	5	2
1376	ANNANG FRANCISCA TORSHIE	Female	4	5	2	3	5
1377	ACQUAH BENJAMIN	Male	4	5	2	3	5
1378	ANNOR RICHAEL	Female	4	5	2	3	5
1379	ANSAH FAUSTINA	Female	4	3	1	5	3
1380	ANSAH MARFO DOREEN	Female	1	2	2	1	2
1381	ACQUAH KINGSLEY OCANSEY	Male	2	1	4	3	1
1382	ANTHONIO HENRIETTA	Female	2	1	4	3	1
1383	APPIAH ISAAC	Male	4	3	1	5	3
1384	APPIAH MOSES	Male	2	1	4	3	1
1385	ACQUAH PHILIP	Male	2	1	4	3	1
1386	APPIAH PRINCE KWESI	Male	2	1	4	3	1
1387	ARKO HAGAR	Female	4	3	1	5	3
1388	ARKOH GALAHAD AHINSAH	Female	2	1	4	3	1
1389	ADAM HALIMATU SADIA	Female	1	2	3	4	5
1390	ARTHUR EBENEZER	Male	1	2	3	4	5
1391	ARTHUR ESSUMAN JAMES	Male	3	4	5	1	2
1392	ARYEETEY MESHACK	Male	1	2	3	4	5
1393	ADAMA-TETTEY MARYNSKY	Female	1	2	3	4	5
1394	ASABIRE SOPHIA	Female	5	2	3	4	5
1395	ASAHENE EMMANUELLA	Female	4	1	5	4	3
1396	ASAMANY CARL	Male	3	2	1	1	2
1397	ADAMS AFISHETU	Female	5	4	3	2	1
1398	ASAMOAH MERCY	Female	5	4	3	2	5
1399	ASARE ERIC AGYIRI AWERE	Male	3	4	5	1	4
1400	ASHITEY MCZILL HAFIZ OKO	Male	2	1	1	2	3
1401	ADAMS ANASS	Male	1	2	3	4	5
1402	ASIEDU MAVIS	Female	1	2	3	4	5
1403	ATIEMO JOSEPHINE	Female	3	4	5	1	2
1404	AWUDER WILLIAM YAO	Male	1	2	3	4	5
1405	ADARKWAH IRENE	Female	1	2	3	4	5
1406	AYER PERCY OKAI	Male	5	2	3	4	5
1407	AYISI BENJAMIN	Male	4	1	5	4	3
1408	AZAMETSI MIRABLE	Female	3	2	1	1	2
1409	ADDAE PORTIA	Female	5	4	3	2	1
1410	BEDIAKO PRISCILLA ODURO	Female	5	4	3	2	1
1411	BELLEY BETTY	Female	2	1	5	4	3
1412	BOATEMAA SLYVIA	Female	5	4	3	2	1
1413	ADDEY AUGUSTINE	Male	2	1	4	3	1
1414	BOATENG ABRAHAM AMEGAVIE	Male	2	5	4	3	5
1415	BONDZIE SAMUEL AIDOO	Male	1	4	4	5	4
1416	BONI MAXWELL EDEM	Male	2	3	1	1	3
1417	ADDICO FRANCIS AWULEY	Male	4	5	2	3	5
1418	BOTCHWAY HANNAH	Female	4	5	2	3	5
1419	BOTCHWAY JEMIMA ATSWEI	Female	1	2	4	5	2
1420	BOTCHWAY MICHAEL	Male	4	5	2	3	5
1421	ADDISON EMMANUEL	Male	4	5	2	3	5
1422	BOYETEY SOLOMON BUERNOR	Male	4	5	2	3	5
1423	BRENYAH SYLVESTER	Male	4	3	1	5	3
1424	CLELAND VERA VASTU	Female	1	2	2	1	2
1425	ADDISON STEPHEN EBO	Male	2	1	4	3	1
1426	DADZIE ISAAC	Male	2	1	4	3	1
1427	DAMALIE DEBORAH YAYRA	Female	4	3	1	5	3
1428	DARKO MOSES	Male	2	1	4	3	1
1429	ADDO NAOMI	Female	2	1	4	3	1
1430	DARKOA DORA	Female	2	1	4	3	1
1431	DENTAAH AMPOFO PATIENCE O.	Female	4	3	1	5	3
1432	DJIDONU DANIEL KWESI	Male	2	1	4	3	1
1433	ADDO PATIENCE	Female	1	2	3	4	5
1434	DOE KENNEDY	Male	1	2	3	4	5
1435	DOKU ESTHER MAKU	Female	3	4	5	1	2
1436	DOWUONA PRISCILLA NORKAI	Female	1	2	3	4	5
1437	ADDY MELIORA GENEVIEVE	Female	1	2	3	4	5
1438	DZRAMADO SANDRA	Female	5	2	3	4	5
1439	DZUFLE BRIDGET	Female	4	1	5	4	3
1440	EDZEOU BERNARD	Male	3	2	1	1	2
1441	ADEKPUITOR PETER	Male	5	4	3	2	1
1442	ENTSIEH EVANS	Male	5	4	3	2	5
1443	FOMETU GLADYS COURINE	Female	3	4	5	1	4
1444	GANYO REBECCA EYRAM	Female	2	1	1	2	3
1445	ADEKU CALEB KOJO	Male	1	2	3	4	5
1446	GBADGO CHARLOTTE	Female	1	2	3	4	5
1447	GODOMEY ABRAHAM	Male	3	4	5	1	2
1448	GYAN FELICIA	Female	1	2	3	4	5
1449	ADETI CLIFFORD KWABLA	Male	1	2	3	4	5
1450	GYAN MANTEY	Male	5	2	3	4	5
1451	GYEKYE EMMANUEL	Male	4	1	5	4	3
1452	HAGAN EDWIN EBOH	Male	3	2	1	1	2
1453	ADINKRAH ABIGAIL	Female	5	4	3	2	1
1454	HAMMOND NATHANIEL	Male	5	4	3	2	1
1455	IBRAHIM MOHAMMED SANUSI	Male	2	1	5	4	3
1456	IBRAHIM SEMIRATU	Female	5	4	3	2	1
1457	ADIOK JOSHUA ALLEN	Male	2	1	4	3	1
1458	INUSAH MOHAMMED	Male	2	5	4	3	5
1459	KABAH ALIAYIRE ALEX	Male	1	4	4	5	4
1460	KELVIN NKANSAH	Male	2	3	1	1	3
1461	ADJAKLOE FLOSSIE DZIFA	Female	4	5	2	3	5
1462	KUDJUH BRIGHT DOSU	Male	4	5	2	3	5
1463	KUMI DANIEL DARKO	Male	1	2	4	5	2
1464	KUMI MARY POKUAA	Female	4	5	2	3	5
1465	ADJASOO LINDA SELINAM	Female	4	5	2	3	5
1466	KUSI LYDIA ADJOA ADJEIWAA	Female	4	5	2	3	5
1467	KWARTENG JESSE SARPONG	Male	4	3	1	5	3
1468	LANTEI- LAMPTEY JESSE NII	Male	1	2	2	1	2
1469	ADJEI - BAAH STEPHEN	Male	2	1	4	3	1
1470	MASOPEH FELICIA VANILLA NAA AMELEY	Female	2	1	4	3	1
1471	MENDS FIDELIA APPIAH	Female	4	3	1	5	3
1472	MENSAH BETTY TELUS	Female	2	1	4	3	1
1473	ADJEI BELINDA ADJETEY	Female	5	4	3	2	1
1474	MENSAH CHARLES GYAMFI	Male	5	4	3	2	5
1475	MENSAH PHILOMINA TECHIE	Female	3	4	5	1	4
1476	MENYE GODWIN JR	Male	2	1	1	2	3
1477	ADJEI DANIEL	Male	1	2	3	4	5
1478	MOHAMMED ADAM ZAKIYU	Male	1	2	3	4	5
1479	NARTEH GEOFFREY	Male	3	4	5	1	2
1480	NKANSAH LOCTUS ADJEI	Female	1	2	3	4	5
1481	ADJEI HENRY	Male	1	2	3	4	5
1482	NORTEY NICHOLAS	Male	5	2	3	4	5
1483	NUAMAH SAMUEL	Male	4	1	5	4	3
1484	NUKPE DAVID CONVERY	Male	3	2	1	1	2
1485	ADJEI JENNIFER ODUA	Female	5	4	3	2	1
1486	NYARKO ANISA	Female	5	4	3	2	1
1487	NYARKO NICHOLAS	Male	2	1	5	4	3
1488	NYARKO WILLIAM KWABENA	Male	5	4	3	2	1
1489	ADJEIBEA RACHEAL	Female	2	1	4	3	1
1490	NYEDU ISHMAEL	Male	2	5	4	3	5
1491	OBENG JULIANA	Female	1	4	4	5	4
1492	OBUOBI SOLOMON	Male	2	3	1	1	3
1493	ADJETEY ERAMI NII ADJEI	Male	4	5	2	3	5
1494	ODOI ERIC AKO	Male	4	5	2	3	5
1495	OFFEI OSEI FRANCIS	Male	1	2	4	5	2
1496	OPOKU SAMUEL	Male	4	5	2	3	5
1497	ADJIN-TETTEY JEREMIAH	Male	4	5	2	3	5
1498	OPOKUA GIFTY NANA AMA	Female	4	5	2	3	5
1499	OSEI RICHMOND KOFI	Male	4	3	1	5	3
1500	OUEDORAOGO ROGER PETER	Male	1	2	2	1	2
1501	ADJOKATSE BERNICE	Female	2	1	4	3	1
1502	OWUSU ALEX	Male	2	1	4	3	1
1503	OWUSU-APENTENG STEPHEN	Male	4	3	1	5	3
1504	PARRY JESSICA	Male	2	1	4	3	1
1505	ADOM JENNIFER ESTHER OHENEBA	Female	4	5	2	3	5
1506	QUAICOE ENOCH	Male	4	5	2	3	5
1507	QUANSAH BELINDA	Female	4	3	1	5	3
1508	QUARTEY EVELYN NAA KWARLEY	Female	1	2	2	1	2
1509	ADOM KWADWO BOAKYE	Male	2	1	4	3	1
1510	QUARTEY SALOMEY	Female	2	1	4	3	1
1511	SAHEED AZEEZAT	Female	4	3	1	5	3
1512	SHAIBU FAUZIYATU	Female	2	1	4	3	1
1513	ADU BONA SUSANNA	Female	5	4	3	2	1
1514	SOWAH ALEXANDRA ENYONAM	Female	5	4	3	2	5
1515	SULLEY HINDU MUNIRU	Female	3	4	5	1	4
1516	TAGOE DAVID	Male	2	1	1	2	3
1517	ADU DORA	Female	1	2	3	4	5
1518	TAWIAH ADAMA OKOE	Male	1	2	3	4	5
1519	TETTEH KELVIN	Male	3	4	5	1	2
1520	TETTEH MALVIN	Male	1	2	3	4	5
1521	ADU PRISCILLA NKETIA	Female	1	2	3	4	5
1522	WADIE LINDA NKANSAH	Female	5	2	3	4	5
1523	WENOMA LINDA	Female	4	1	5	4	3
1524	YARTEY SEFIATU	Female	3	2	1	1	2
1525	ADU-AGYEI AWURA AKUA	Female	5	4	3	2	1
1526	OWUSU ALEX	Male	5	4	3	2	1
1527	OWUSU-APENTENG STEPHEN	Male	2	1	5	4	3
1528	PARRY JESSICA	Male	5	4	3	2	1
1529	ADU-TWUM FREDERICK ASANTE	Male	2	1	4	3	1
1530	QUAICOE ENOCH	Male	2	5	4	3	5
1531	QUANSAH BELINDA	Female	1	4	4	5	4
1532	QUARTEY EVELYN NAA KWARLEY	Female	2	3	1	1	3
1533	ADUSEI GIFTY YEBOAH	Female	4	5	2	3	5
1534	QUARTEY SALOMEY	Female	4	5	2	3	5
1535	SAHEED AZEEZAT	Female	1	2	4	5	2
1536	SHAIBU FAUZIYATU	Female	4	5	2	3	5
1537	ADUUM REBECCA	Female	4	5	2	3	5
1538	AFARI STEPHEN	Male	4	5	2	3	5
1539	AFOTEY PATRICK DUNYO	Male	4	3	1	5	3
1540	AFRAH TRACY NTOW	Female	1	2	2	1	2
1541	ABABIO ABEDNEGO A.	Male	2	1	4	3	1
1542	ABOAGYE ELIZABETH BOADIWAA	Female	2	1	4	3	1
1543	ABOE ANDREWS	Male	4	3	1	5	3
1544	ABRAHAM-QUANSAH MARY EVA	Female	2	1	4	3	1
1545	ABALEM JENNIFER	Female	4	5	2	3	5
1546	ADDAE SANDRA	Female	4	5	2	3	5
1547	ADJEI FREDERICK YAW	Male	4	3	1	5	3
1548	ADJEI PRINCE BAFFOUR	Male	1	2	2	1	2
1549	ABBAN VIDA OWUSU	Female	2	1	4	3	1
1550	ADJEI SAMUEL	Male	2	1	4	3	1
1551	ADJORLOLO MERCY NORKPLIM	Female	4	3	1	5	3
1552	ADOCTOR VICTORIA	Female	2	1	4	3	1
1553	ADU AFRIYIE	Male	1	2	3	4	5
1554	ADU EMMANUEL	Male	1	2	3	4	5
1555	ADZOWU MILLICENT	Female	3	4	5	1	2
1556	AFORDE JAMES ABLORDE	Male	1	2	3	4	5
1557	ABDALLAH FATIMATU	Female	1	2	3	4	5
1558	AGBENYEGA STEPHEN	Male	5	2	3	4	5
1559	AGBOGBA LANDRY KWAME	Male	4	1	5	4	3
1560	AGGERH BARNABAS KOBBY	Male	3	2	1	1	2
1561	ABDULAI FAIZA	Female	5	4	3	2	1
1562	AGOE JEHOSHAPHAT SOWAH	Male	5	4	3	2	5
1563	AGUDA NARKIE PATRICIA	Female	3	4	5	1	4
1564	AGYARE PRISCILLA DARFOUR	Female	2	1	1	2	3
1565	ABEKAH EMMANUEL	Male	1	2	3	4	5
1566	AGYEI RICHARD KWAME	Male	1	2	3	4	5
1567	AGYEMAN DUAH BOATEMAA	Female	3	4	5	1	2
1568	AGYEMAN PAUL BOAKYE	Male	1	2	3	4	5
1569	ABOAGYE DAVID ADU	Male	1	2	3	4	5
1570	AGYIRI GEORGINA	Female	5	2	3	4	5
1571	AHIABLEY PORTIA	Female	4	1	5	4	3
1572	AHONI MAUDLIN AYONGO	Female	3	2	1	1	2
1573	ABOAGYE FELIX	Male	5	4	3	2	1
1574	AKAGBO REBECCA	Female	5	4	3	2	1
1575	AKOTO REINDOLF APPIAH	Male	2	1	5	4	3
1576	AKUFFO GIDEON	Male	5	4	3	2	1
1577	ABU ABDUL MANAF	Male	2	1	4	3	1
1578	ALAGBO EMMANUEL	Male	2	5	4	3	5
1579	ALLOTEY KPAKPO VINCENT	Male	1	4	4	5	4
1580	ALLOTEY PEARL NAA AKU	Female	2	3	1	1	3
1581	ABUBAKAR ARAFAT SUFYAN	Male	4	5	2	3	5
1582	AMAKYE JAMES SARPONG	Male	4	5	2	3	5
1583	AMEVOR ERIC	Male	1	2	4	5	2
1584	AMOAH CHARLOTTE KORKOR	Female	4	5	2	3	5
1585	ACHEAMPONG CHRISTABEL	Female	4	5	2	3	5
1586	AMOAH MILDRED	Female	4	5	2	3	5
1587	AMOAKO ERNESTINA OPOKUA	Female	4	3	1	5	3
1588	AMPONSAH CECILIA ABENA	Female	1	2	2	1	2
1589	ACHEAMPONG KINGSLEY	Male	2	1	4	3	1
1590	AMUZU STELLA KABUKI	Female	2	1	4	3	1
1591	ANABI MUSAH AHMED	Male	4	3	1	5	3
1592	ANDERSON GIFTY	Female	2	1	4	3	1
1593	ACHEAMPONG MICHAEL APPIAH	Male	2	1	4	3	1
1594	ANDERSON VIVIAN	Female	2	1	4	3	1
1595	ANKOMAH GEORGINA	Female	4	3	1	5	3
1596	ANNANG FRANCISCA TORSHIE	Female	2	1	4	3	1
1597	ACQUAH BENJAMIN	Male	1	2	3	4	5
1598	ANNOR RICHAEL	Female	1	2	3	4	5
1599	ANSAH FAUSTINA	Female	3	4	5	1	2
1600	ANSAH MARFO DOREEN	Female	1	2	3	4	5
1601	ACQUAH KINGSLEY OCANSEY	Male	1	2	3	4	5
1602	ANTHONIO HENRIETTA	Female	5	2	3	4	5
1603	APPIAH ISAAC	Male	4	1	5	4	3
1604	APPIAH MOSES	Male	3	2	1	1	2
1605	ACQUAH PHILIP	Male	5	4	3	2	1
1606	APPIAH PRINCE KWESI	Male	5	4	3	2	5
1607	ARKO HAGAR	Female	3	4	5	1	4
1608	ARKOH GALAHAD AHINSAH	Female	2	1	1	2	3
1609	ADAM HALIMATU SADIA	Female	1	2	3	4	5
1610	ARTHUR EBENEZER	Male	1	2	3	4	5
1611	ARTHUR ESSUMAN JAMES	Male	3	4	5	1	2
1612	ARYEETEY MESHACK	Male	1	2	3	4	5
1613	ADAMA-TETTEY MARYNSKY	Female	1	2	3	4	5
1614	ASABIRE SOPHIA	Female	5	2	3	4	5
1615	ASAHENE EMMANUELLA	Female	4	1	5	4	3
1616	ASAMANY CARL	Male	3	2	1	1	2
1617	ADAMS AFISHETU	Female	5	4	3	2	1
1618	ASAMOAH MERCY	Female	5	4	3	2	1
1619	ASARE ERIC AGYIRI AWERE	Male	2	1	5	4	3
1620	ASHITEY MCZILL HAFIZ OKO	Male	5	4	3	2	1
1621	ADAMS ANASS	Male	2	1	4	3	1
1622	ASIEDU MAVIS	Female	2	5	4	3	5
1623	ATIEMO JOSEPHINE	Female	1	4	4	5	4
1624	AWUDER WILLIAM YAO	Male	2	3	1	1	3
1625	ADARKWAH IRENE	Female	4	5	2	3	5
1626	AYER PERCY OKAI	Male	4	5	2	3	5
1627	AYISI BENJAMIN	Male	1	2	4	5	2
1628	AZAMETSI MIRABLE	Female	4	5	2	3	5
1629	ADDAE PORTIA	Female	4	5	2	3	5
1630	BEDIAKO PRISCILLA ODURO	Female	4	5	2	3	5
1631	BELLEY BETTY	Female	4	3	1	5	3
1632	BOATEMAA SLYVIA	Female	1	2	2	1	2
1633	ADDEY AUGUSTINE	Male	2	1	4	3	1
1634	BOATENG ABRAHAM AMEGAVIE	Male	2	1	4	3	1
1635	BONDZIE SAMUEL AIDOO	Male	4	3	1	5	3
1636	BONI MAXWELL EDEM	Male	2	1	4	3	1
1637	ADDICO FRANCIS AWULEY	Male	2	1	4	3	1
1638	BOTCHWAY HANNAH	Female	2	1	4	3	1
1639	BOTCHWAY JEMIMA ATSWEI	Female	4	3	1	5	3
1640	BOTCHWAY MICHAEL	Male	2	1	4	3	1
1641	ADDISON EMMANUEL	Male	1	2	3	4	5
1642	BOYETEY SOLOMON BUERNOR	Male	1	2	3	4	5
1643	BRENYAH SYLVESTER	Male	3	4	5	1	2
1644	CLELAND VERA VASTU	Female	1	2	3	4	5
1645	ADDISON STEPHEN EBO	Male	1	2	3	4	5
1646	DADZIE ISAAC	Male	5	2	3	4	5
1647	DAMALIE DEBORAH YAYRA	Female	4	1	5	4	3
1648	DARKO MOSES	Male	3	2	1	1	2
1649	ADDO NAOMI	Female	5	4	3	2	1
1650	DARKOA DORA	Female	5	4	3	2	5
1651	DENTAAH AMPOFO PATIENCE O.	Female	3	4	5	1	4
1652	DJIDONU DANIEL KWESI	Male	2	1	1	2	3
1653	ADDO PATIENCE	Female	1	2	3	4	5
1654	DOE KENNEDY	Male	1	2	3	4	5
1655	DOKU ESTHER MAKU	Female	3	4	5	1	2
1656	DOWUONA PRISCILLA NORKAI	Female	1	2	3	4	5
1657	ADDY MELIORA GENEVIEVE	Female	1	2	3	4	5
1658	DZRAMADO SANDRA	Female	5	2	3	4	5
1659	DZUFLE BRIDGET	Female	4	1	5	4	3
1660	EDZEOU BERNARD	Male	3	2	1	1	2
1661	ADEKPUITOR PETER	Male	5	4	3	2	1
1662	ENTSIEH EVANS	Male	5	4	3	2	1
1663	FOMETU GLADYS COURINE	Female	2	1	5	4	3
1664	GANYO REBECCA EYRAM	Female	5	4	3	2	1
1665	ADEKU CALEB KOJO	Male	2	1	4	3	1
1666	GBADGO CHARLOTTE	Female	2	5	4	3	5
1667	GODOMEY ABRAHAM	Male	1	4	4	5	4
1668	GYAN FELICIA	Female	2	3	1	1	3
1669	ADETI CLIFFORD KWABLA	Male	4	5	2	3	5
1670	GYAN MANTEY	Male	4	5	2	3	5
1671	GYEKYE EMMANUEL	Male	1	2	4	5	2
1672	HAGAN EDWIN EBOH	Male	4	5	2	3	5
1673	ADINKRAH ABIGAIL	Female	4	5	2	3	5
1674	HAMMOND NATHANIEL	Male	4	5	2	3	5
1675	IBRAHIM MOHAMMED SANUSI	Male	4	3	1	5	3
1676	IBRAHIM SEMIRATU	Female	1	2	2	1	2
1677	ADIOK JOSHUA ALLEN	Male	2	1	4	3	1
1678	INUSAH MOHAMMED	Male	2	1	4	3	1
1679	KABAH ALIAYIRE ALEX	Male	4	3	1	5	3
1680	KELVIN NKANSAH	Male	2	1	4	3	1
1681	ADJAKLOE FLOSSIE DZIFA	Female	2	1	4	3	1
1682	KUDJUH BRIGHT DOSU	Male	2	1	4	3	1
1683	KUMI DANIEL DARKO	Male	4	3	1	5	3
1684	KUMI MARY POKUAA	Female	2	1	4	3	1
1685	ADJASOO LINDA SELINAM	Female	1	2	3	4	5
1686	KUSI LYDIA ADJOA ADJEIWAA	Female	1	2	3	4	5
1687	KWARTENG JESSE SARPONG	Male	3	4	5	1	2
1688	LANTEI- LAMPTEY JESSE NII	Male	1	2	3	4	5
1689	ADJEI - BAAH STEPHEN	Male	1	2	3	4	5
1690	MASOPEH FELICIA VANILLA NAA AMELEY	Female	5	2	3	4	5
1691	MENDS FIDELIA APPIAH	Female	4	1	5	4	3
1692	MENSAH BETTY TELUS	Female	3	2	1	1	2
1693	ADJEI BELINDA ADJETEY	Female	5	4	3	2	1
1694	MENSAH CHARLES GYAMFI	Male	5	4	3	2	5
1695	MENSAH PHILOMINA TECHIE	Female	3	4	5	1	4
1696	MENYE GODWIN JR	Male	2	1	1	2	3
1697	ADJEI DANIEL	Male	1	2	3	4	5
1698	MOHAMMED ADAM ZAKIYU	Male	1	2	3	4	5
1699	NARTEH GEOFFREY	Male	3	4	5	1	2
1700	NKANSAH LOCTUS ADJEI	Female	1	2	3	4	5
1701	ADJEI HENRY	Male	1	2	3	4	5
1702	NORTEY NICHOLAS	Male	5	2	3	4	5
1703	NUAMAH SAMUEL	Male	4	1	5	4	3
1704	NUKPE DAVID CONVERY	Male	3	2	1	1	2
1705	ADJEI JENNIFER ODUA	Female	5	4	3	2	1
1706	NYARKO ANISA	Female	5	4	3	2	1
1707	NYARKO NICHOLAS	Male	2	1	5	4	3
1708	NYARKO WILLIAM KWABENA	Male	5	4	3	2	1
1709	ADJEIBEA RACHEAL	Female	2	1	4	3	1
1710	NYEDU ISHMAEL	Male	2	5	4	3	5
1711	OBENG JULIANA	Female	1	4	4	5	4
1712	OBUOBI SOLOMON	Male	2	3	1	1	3
1713	ADJETEY ERAMI NII ADJEI	Male	4	5	2	3	5
1714	ODOI ERIC AKO	Male	4	5	2	3	5
1715	OFFEI OSEI FRANCIS	Male	1	2	4	5	2
1716	OPOKU SAMUEL	Male	4	5	2	3	5
1717	ADJIN-TETTEY JEREMIAH	Male	4	5	2	3	5
1718	OPOKUA GIFTY NANA AMA	Female	4	5	2	3	5
1719	OSEI RICHMOND KOFI	Male	4	3	1	5	3
1720	OUEDORAOGO ROGER PETER	Male	1	2	2	1	2
1721	ADJOKATSE BERNICE	Female	2	1	4	3	1
1722	OWUSU ALEX	Male	2	1	4	3	1
1723	OWUSU-APENTENG STEPHEN	Male	4	3	1	5	3
1724	PARRY JESSICA	Male	2	1	4	3	1
1725	ADOM JENNIFER ESTHER OHENEBA	Female	5	4	3	2	1
1726	QUAICOE ENOCH	Male	5	4	3	2	5
1727	QUANSAH BELINDA	Female	3	4	5	1	4
1728	QUARTEY EVELYN NAA KWARLEY	Female	2	1	1	2	3
1729	ADOM KWADWO BOAKYE	Male	1	2	3	4	5
1730	QUARTEY SALOMEY	Female	1	2	3	4	5
1731	SAHEED AZEEZAT	Female	3	4	5	1	2
1732	SHAIBU FAUZIYATU	Female	1	2	3	4	5
1733	ADU BONA SUSANNA	Female	1	2	3	4	5
1734	SOWAH ALEXANDRA ENYONAM	Female	5	2	3	4	5
1735	SULLEY HINDU MUNIRU	Female	4	1	5	4	3
1736	TAGOE DAVID	Male	3	2	1	1	2
1737	ADU DORA	Female	5	4	3	2	1
1738	TAWIAH ADAMA OKOE	Male	5	4	3	2	1
1739	TETTEH KELVIN	Male	2	1	5	4	3
1740	TETTEH MALVIN	Male	5	4	3	2	1
1741	ADU PRISCILLA NKETIA	Female	2	1	4	3	1
1742	WADIE LINDA NKANSAH	Female	2	5	4	3	5
1743	WENOMA LINDA	Female	1	4	4	5	4
1744	YARTEY SEFIATU	Female	2	3	1	1	3
1745	ADU-AGYEI AWURA AKUA	Female	4	5	2	3	5
1746	OWUSU ALEX	Male	4	5	2	3	5
1747	OWUSU-APENTENG STEPHEN	Male	1	2	4	5	2
1748	PARRY JESSICA	Male	4	5	2	3	5
1749	ADU-TWUM FREDERICK ASANTE	Male	4	5	2	3	5
1750	QUAICOE ENOCH	Male	4	5	2	3	5
1751	QUANSAH BELINDA	Female	4	3	1	5	3
1752	QUARTEY EVELYN NAA KWARLEY	Female	1	2	2	1	2
1753	ADUSEI GIFTY YEBOAH	Female	2	1	4	3	1
1754	QUARTEY SALOMEY	Female	2	1	4	3	1
1755	SAHEED AZEEZAT	Female	4	3	1	5	3
1756	SHAIBU FAUZIYATU	Female	2	1	4	3	1
1757	ADUUM REBECCA	Female	4	5	2	3	5
1758	AFARI STEPHEN	Male	4	5	2	3	5
1759	AFOTEY PATRICK DUNYO	Male	4	3	1	5	3
1760	AFRAH TRACY NTOW	Female	1	2	2	1	2
1761	ABABIO ABEDNEGO A.	Male	2	1	4	3	1
1762	ABOAGYE ELIZABETH BOADIWAA	Female	2	1	4	3	1
1763	ABOE ANDREWS	Male	4	3	1	5	3
1764	ABRAHAM-QUANSAH MARY EVA	Female	2	1	4	3	1
1765	ABALEM JENNIFER	Female	5	4	3	2	1
1766	ADDAE SANDRA	Female	5	4	3	2	5
1767	ADJEI FREDERICK YAW	Male	3	4	5	1	4
1768	ADJEI PRINCE BAFFOUR	Male	2	1	1	2	3
1769	ABBAN VIDA OWUSU	Female	1	2	3	4	5
1770	ADJEI SAMUEL	Male	1	2	3	4	5
1771	ADJORLOLO MERCY NORKPLIM	Female	3	4	5	1	2
1772	ADOCTOR VICTORIA	Female	1	2	3	4	5
1773	ADU AFRIYIE	Male	1	2	3	4	5
1774	ADU EMMANUEL	Male	5	2	3	4	5
1775	ADZOWU MILLICENT	Female	4	1	5	4	3
1776	AFORDE JAMES ABLORDE	Male	3	2	1	1	2
1777	ABDALLAH FATIMATU	Female	5	4	3	2	1
1778	AGBENYEGA STEPHEN	Male	5	4	3	2	1
1779	AGBOGBA LANDRY KWAME	Male	2	1	5	4	3
1780	AGGERH BARNABAS KOBBY	Male	5	4	3	2	1
1781	ABDULAI FAIZA	Female	2	1	4	3	1
1782	AGOE JEHOSHAPHAT SOWAH	Male	2	5	4	3	5
1783	AGUDA NARKIE PATRICIA	Female	1	4	4	5	4
1784	AGYARE PRISCILLA DARFOUR	Female	2	3	1	1	3
1785	ABEKAH EMMANUEL	Male	4	5	2	3	5
1786	AGYEI RICHARD KWAME	Male	4	5	2	3	5
1787	AGYEMAN DUAH BOATEMAA	Female	1	2	4	5	2
1788	AGYEMAN PAUL BOAKYE	Male	4	5	2	3	5
1789	ABOAGYE DAVID ADU	Male	4	5	2	3	5
1790	AGYIRI GEORGINA	Female	4	5	2	3	5
1791	AHIABLEY PORTIA	Female	4	3	1	5	3
1792	AHONI MAUDLIN AYONGO	Female	1	2	2	1	2
1793	ABOAGYE FELIX	Male	2	1	4	3	1
1794	AKAGBO REBECCA	Female	2	1	4	3	1
1795	AKOTO REINDOLF APPIAH	Male	4	3	1	5	3
1796	AKUFFO GIDEON	Male	2	1	4	3	1
1797	ABU ABDUL MANAF	Male	4	5	2	3	5
1798	ALAGBO EMMANUEL	Male	4	5	2	3	5
1799	ALLOTEY KPAKPO VINCENT	Male	4	3	1	5	3
1800	ALLOTEY PEARL NAA AKU	Female	1	2	2	1	2
1801	ABUBAKAR ARAFAT SUFYAN	Male	2	1	4	3	1
1802	AMAKYE JAMES SARPONG	Male	2	1	4	3	1
1803	AMEVOR ERIC	Male	4	3	1	5	3
1804	AMOAH CHARLOTTE KORKOR	Female	2	1	4	3	1
1805	ACHEAMPONG CHRISTABEL	Female	1	2	3	4	5
1806	AMOAH MILDRED	Female	1	2	3	4	5
1807	AMOAKO ERNESTINA OPOKUA	Female	3	4	5	1	2
1808	AMPONSAH CECILIA ABENA	Female	1	2	3	4	5
1809	ACHEAMPONG KINGSLEY	Male	1	2	3	4	5
1810	AMUZU STELLA KABUKI	Female	5	2	3	4	5
1811	ANABI MUSAH AHMED	Male	4	1	5	4	3
1812	ANDERSON GIFTY	Female	3	2	1	1	2
1813	ACHEAMPONG MICHAEL APPIAH	Male	5	4	3	2	1
1814	ANDERSON VIVIAN	Female	5	4	3	2	5
1815	ANKOMAH GEORGINA	Female	3	4	5	1	4
1816	ANNANG FRANCISCA TORSHIE	Female	2	1	1	2	3
1817	ACQUAH BENJAMIN	Male	1	2	3	4	5
1818	ANNOR RICHAEL	Female	1	2	3	4	5
1819	ANSAH FAUSTINA	Female	3	4	5	1	2
1820	ANSAH MARFO DOREEN	Female	1	2	3	4	5
1821	ACQUAH KINGSLEY OCANSEY	Male	1	2	3	4	5
1822	ANTHONIO HENRIETTA	Female	5	2	3	4	5
1823	APPIAH ISAAC	Male	4	1	5	4	3
1824	APPIAH MOSES	Male	3	2	1	1	2
1825	ACQUAH PHILIP	Male	5	4	3	2	1
1826	APPIAH PRINCE KWESI	Male	5	4	3	2	1
1827	ARKO HAGAR	Female	2	1	5	4	3
1828	ARKOH GALAHAD AHINSAH	Female	5	4	3	2	1
1829	ADAM HALIMATU SADIA	Female	2	1	4	3	1
1830	ARTHUR EBENEZER	Male	2	5	4	3	5
1831	ARTHUR ESSUMAN JAMES	Male	1	4	4	5	4
1832	ARYEETEY MESHACK	Male	2	3	1	1	3
1833	ADAMA-TETTEY MARYNSKY	Female	4	5	2	3	5
1834	ASABIRE SOPHIA	Female	4	5	2	3	5
1835	ASAHENE EMMANUELLA	Female	1	2	4	5	2
1836	ASAMANY CARL	Male	4	5	2	3	5
1837	ADAMS AFISHETU	Female	4	5	2	3	5
1838	ASAMOAH MERCY	Female	4	5	2	3	5
1839	ASARE ERIC AGYIRI AWERE	Male	4	3	1	5	3
1840	ASHITEY MCZILL HAFIZ OKO	Male	1	2	2	1	2
1841	ADAMS ANASS	Male	2	1	4	3	1
1842	ASIEDU MAVIS	Female	2	1	4	3	1
1843	ATIEMO JOSEPHINE	Female	4	3	1	5	3
1844	AWUDER WILLIAM YAO	Male	2	1	4	3	1
1845	ADARKWAH IRENE	Female	2	1	4	3	1
1846	AYER PERCY OKAI	Male	2	1	4	3	1
1847	AYISI BENJAMIN	Male	4	3	1	5	3
1848	AZAMETSI MIRABLE	Female	2	1	4	3	1
1849	ADDAE PORTIA	Female	1	2	3	4	5
1850	BEDIAKO PRISCILLA ODURO	Female	1	2	3	4	5
1851	BELLEY BETTY	Female	3	4	5	1	2
1852	BOATEMAA SLYVIA	Female	1	2	3	4	5
1853	ADDEY AUGUSTINE	Male	1	2	3	4	5
1854	BOATENG ABRAHAM AMEGAVIE	Male	5	2	3	4	5
1855	BONDZIE SAMUEL AIDOO	Male	4	1	5	4	3
1856	BONI MAXWELL EDEM	Male	3	2	1	1	2
1857	ADDICO FRANCIS AWULEY	Male	5	4	3	2	1
1858	BOTCHWAY HANNAH	Female	5	4	3	2	5
1859	BOTCHWAY JEMIMA ATSWEI	Female	3	4	5	1	4
1860	BOTCHWAY MICHAEL	Male	2	1	1	2	3
1861	ADDISON EMMANUEL	Male	1	2	3	4	5
1862	BOYETEY SOLOMON BUERNOR	Male	1	2	3	4	5
1863	BRENYAH SYLVESTER	Male	3	4	5	1	2
1864	CLELAND VERA VASTU	Female	1	2	3	4	5
1865	ADDISON STEPHEN EBO	Male	1	2	3	4	5
1866	DADZIE ISAAC	Male	5	2	3	4	5
1867	DAMALIE DEBORAH YAYRA	Female	4	1	5	4	3
1868	DARKO MOSES	Male	3	2	1	1	2
1869	ADDO NAOMI	Female	5	4	3	2	1
1870	DARKOA DORA	Female	5	4	3	2	1
1871	DENTAAH AMPOFO PATIENCE O.	Female	2	1	5	4	3
1872	DJIDONU DANIEL KWESI	Male	5	4	3	2	1
1873	ADDO PATIENCE	Female	2	1	4	3	1
1874	DOE KENNEDY	Male	2	5	4	3	5
1875	DOKU ESTHER MAKU	Female	1	4	4	5	4
1876	DOWUONA PRISCILLA NORKAI	Female	2	3	1	1	3
1877	ADDY MELIORA GENEVIEVE	Female	4	5	2	3	5
1878	DZRAMADO SANDRA	Female	4	5	2	3	5
1879	DZUFLE BRIDGET	Female	1	2	4	5	2
1880	EDZEOU BERNARD	Male	4	5	2	3	5
1881	ADEKPUITOR PETER	Male	4	5	2	3	5
1882	ENTSIEH EVANS	Male	4	5	2	3	5
1883	FOMETU GLADYS COURINE	Female	4	3	1	5	3
1884	GANYO REBECCA EYRAM	Female	1	2	2	1	2
1885	ADEKU CALEB KOJO	Male	2	1	4	3	1
1886	GBADGO CHARLOTTE	Female	2	1	4	3	1
1887	GODOMEY ABRAHAM	Male	4	3	1	5	3
1888	GYAN FELICIA	Female	2	1	4	3	1
1889	ADETI CLIFFORD KWABLA	Male	2	1	4	3	1
1890	GYAN MANTEY	Male	2	1	4	3	1
1891	GYEKYE EMMANUEL	Male	4	3	1	5	3
1892	HAGAN EDWIN EBOH	Male	2	1	4	3	1
1893	ADINKRAH ABIGAIL	Female	1	2	3	4	5
1894	HAMMOND NATHANIEL	Male	1	2	3	4	5
1895	IBRAHIM MOHAMMED SANUSI	Male	3	4	5	1	2
1896	IBRAHIM SEMIRATU	Female	1	2	3	4	5
1897	ADIOK JOSHUA ALLEN	Male	1	2	3	4	5
1898	INUSAH MOHAMMED	Male	5	2	3	4	5
1899	KABAH ALIAYIRE ALEX	Male	4	1	5	4	3
1900	KELVIN NKANSAH	Male	3	2	1	1	2
1901	ADJAKLOE FLOSSIE DZIFA	Female	5	4	3	2	1
1902	KUDJUH BRIGHT DOSU	Male	5	4	3	2	5
1903	KUMI DANIEL DARKO	Male	3	4	5	1	4
1904	KUMI MARY POKUAA	Female	2	1	1	2	3
1905	ADJASOO LINDA SELINAM	Female	1	2	3	4	5
1906	KUSI LYDIA ADJOA ADJEIWAA	Female	1	2	3	4	5
1907	KWARTENG JESSE SARPONG	Male	3	4	5	1	2
1908	LANTEI- LAMPTEY JESSE NII	Male	1	2	3	4	5
1909	ADJEI - BAAH STEPHEN	Male	1	2	3	4	5
1910	MASOPEH FELICIA VANILLA NAA AMELEY	Female	5	2	3	4	5
1911	MENDS FIDELIA APPIAH	Female	4	1	5	4	3
1912	MENSAH BETTY TELUS	Female	3	2	1	1	2
1913	ADJEI BELINDA ADJETEY	Female	5	4	3	2	1
1914	MENSAH CHARLES GYAMFI	Male	5	4	3	2	1
1915	MENSAH PHILOMINA TECHIE	Female	2	1	5	4	3
1916	MENYE GODWIN JR	Male	5	4	3	2	1
1917	ADJEI DANIEL	Male	2	1	4	3	1
1918	MOHAMMED ADAM ZAKIYU	Male	2	5	4	3	5
1919	NARTEH GEOFFREY	Male	1	4	4	5	4
1920	NKANSAH LOCTUS ADJEI	Female	2	3	1	1	3
1921	ADJEI HENRY	Male	4	5	2	3	5
1922	NORTEY NICHOLAS	Male	4	5	2	3	5
1923	NUAMAH SAMUEL	Male	1	2	4	5	2
1924	NUKPE DAVID CONVERY	Male	4	5	2	3	5
1925	ADJEI JENNIFER ODUA	Female	4	5	2	3	5
1926	NYARKO ANISA	Female	4	5	2	3	5
1927	NYARKO NICHOLAS	Male	4	3	1	5	3
1928	NYARKO WILLIAM KWABENA	Male	1	2	2	1	2
1929	ADJEIBEA RACHEAL	Female	2	1	4	3	1
1930	NYEDU ISHMAEL	Male	2	1	4	3	1
1931	OBENG JULIANA	Female	4	3	1	5	3
1932	OBUOBI SOLOMON	Male	2	1	4	3	1
1933	ADJETEY ERAMI NII ADJEI	Male	2	1	4	3	1
1934	ODOI ERIC AKO	Male	2	1	4	3	1
1935	OFFEI OSEI FRANCIS	Male	4	3	1	5	3
1936	OPOKU SAMUEL	Male	2	1	4	3	1
1937	ADJIN-TETTEY JEREMIAH	Male	1	2	3	4	5
1938	OPOKUA GIFTY NANA AMA	Female	1	2	3	4	5
1939	OSEI RICHMOND KOFI	Male	3	4	5	1	2
1940	OUEDORAOGO ROGER PETER	Male	1	2	3	4	5
1941	ADJOKATSE BERNICE	Female	1	2	3	4	5
1942	OWUSU ALEX	Male	5	2	3	4	5
1943	OWUSU-APENTENG STEPHEN	Male	4	1	5	4	3
1944	PARRY JESSICA	Male	3	2	1	1	2
1945	ADOM JENNIFER ESTHER OHENEBA	Female	5	4	3	2	1
1946	QUAICOE ENOCH	Male	5	4	3	2	5
1947	QUANSAH BELINDA	Female	3	4	5	1	4
1948	QUARTEY EVELYN NAA KWARLEY	Female	2	1	1	2	3
1949	ADOM KWADWO BOAKYE	Male	1	2	3	4	5
1950	QUARTEY SALOMEY	Female	1	2	3	4	5
1951	SAHEED AZEEZAT	Female	3	4	5	1	2
1952	SHAIBU FAUZIYATU	Female	1	2	3	4	5
1953	ADU BONA SUSANNA	Female	1	2	3	4	5
1954	SOWAH ALEXANDRA ENYONAM	Female	5	2	3	4	5
1955	SULLEY HINDU MUNIRU	Female	4	1	5	4	3
1956	TAGOE DAVID	Male	3	2	1	1	2
1957	ADU DORA	Female	5	4	3	2	1
1958	TAWIAH ADAMA OKOE	Male	5	4	3	2	1
1959	TETTEH KELVIN	Male	2	1	5	4	3
1960	TETTEH MALVIN	Male	5	4	3	2	1
1961	ADU PRISCILLA NKETIA	Female	2	1	4	3	1
1962	WADIE LINDA NKANSAH	Female	2	5	4	3	5
1963	WENOMA LINDA	Female	1	4	4	5	4
1964	YARTEY SEFIATU	Female	2	3	1	1	3
1965	ADU-AGYEI AWURA AKUA	Female	4	5	2	3	5
1966	OWUSU ALEX	Male	4	5	2	3	5
1967	OWUSU-APENTENG STEPHEN	Male	1	2	4	5	2
1968	PARRY JESSICA	Male	4	5	2	3	5
1969	ADU-TWUM FREDERICK ASANTE	Male	4	5	2	3	5
1970	QUAICOE ENOCH	Male	4	5	2	3	5
1971	QUANSAH BELINDA	Female	4	3	1	5	3
1972	QUARTEY EVELYN NAA KWARLEY	Female	1	2	2	1	2
1973	ADUSEI GIFTY YEBOAH	Female	2	1	4	3	1
1974	QUARTEY SALOMEY	Female	2	1	4	3	1
1975	SAHEED AZEEZAT	Female	4	3	1	5	3
1976	SHAIBU FAUZIYATU	Female	2	1	4	3	1
1977	ADUUM REBECCA	Female	5	4	3	2	1
1978	AFARI STEPHEN	Male	5	4	3	2	5
1979	AFOTEY PATRICK DUNYO	Male	3	4	5	1	4
1980	AFRAH TRACY NTOW	Female	2	1	1	2	3
1981	ABABIO ABEDNEGO A.	Male	1	2	3	4	5
1982	ABOAGYE ELIZABETH BOADIWAA	Female	1	2	3	4	5
1983	ABOE ANDREWS	Male	3	4	5	1	2
1984	ABRAHAM-QUANSAH MARY EVA	Female	1	2	3	4	5
1985	ABALEM JENNIFER	Female	1	2	3	4	5
1986	ADDAE SANDRA	Female	5	2	3	4	5
1987	ADJEI FREDERICK YAW	Male	4	1	5	4	3
1988	ADJEI PRINCE BAFFOUR	Male	3	2	1	1	2
1989	ABBAN VIDA OWUSU	Female	5	4	3	2	1
1990	ADJEI SAMUEL	Male	5	4	3	2	1
1991	ADJORLOLO MERCY NORKPLIM	Female	2	1	5	4	3
1992	ADOCTOR VICTORIA	Female	5	4	3	2	1
1993	ADU AFRIYIE	Male	2	1	4	3	1
1994	ADU EMMANUEL	Male	2	5	4	3	5
1995	ADZOWU MILLICENT	Female	1	4	4	5	4
1996	AFORDE JAMES ABLORDE	Male	2	3	1	1	3
1997	ABDALLAH FATIMATU	Female	4	5	2	3	5
[truncated: 2,404 more rows]

## Sheet: TV Program Ratings-Movie
ACCRA TECHNICAL UNIVERSITY
ATU Dataset - HND Marketing		MOVIE/TV SERIES RATINGS (1 - 5)								TV PROGRAM RATINGS (1 - 5)
No.	NAME	SEX	HORROR	COMEDY	ACTION	ADVENTURE	DRAMA			1	2	3	4	5
1	ABABIO ABEDNEGO A.	Male	2	3	5	4	4		Horror	1890	2139	85	170	112
2	ABOAGYE ELIZABETH BOADIWAA	Female	1	2	3	2	2		Comedy	167	1941	2039	146	1941
3	ABOE ANDREWS	Male	2	3	5	4	4		Action	114	108	1951	148	2075
4	ABRAHAM-QUANSAH MARY EVA	Female	1	2	3	2	2		Adventure	120	1477	525	1702	572
5	ABALEM JENNIFER	Female	1	2	3	2	2		Drama	164	1805	129	2007	291
6	ADDAE SANDRA	Female	1	2	3	2	2		Total Ratings	2456	7472	4732	4177	4996
7	ADJEI FREDERICK YAW	Male	2	3	5	4	4		Grand Total of all Ratings	23833
8	ADJEI PRINCE BAFFOUR	Male	2	3	5	4	4
9	ABBAN VIDA OWUSU	Female	1	2	3	2	2
10	ADJEI SAMUEL	Male	2	3	5	4	4
11	ADJORLOLO MERCY NORKPLIM	Female	1	2	3	2	2
12	ADOCTOR VICTORIA	Female	1	2	3	2	2
13	ADU AFRIYIE	Male	2	3	5	4	4
14	ADU EMMANUEL	Male	2	3	5	4	4
15	ADZOWU MILLICENT	Female	1	2	3	2	2
16	AFORDE JAMES ABLORDE	Male	2	3	5	4	4
17	ABDALLAH FATIMATU	Female	1	2	3	2	2
18	AGBENYEGA STEPHEN	Male	2	3	5	4	4
19	AGBOGBA LANDRY KWAME	Male	2	3	5	4	4
20	AGGERH BARNABAS KOBBY	Male	2	3	5	4	4
21	ABDULAI FAIZA	Female	1	2	3	2	2
22	AGOE JEHOSHAPHAT SOWAH	Male	2	3	5	4	4
23	AGUDA NARKIE PATRICIA	Female	1	2	3	2	2
24	AGYARE PRISCILLA DARFOUR	Female	1	2	3	2	2
25	ABEKAH EMMANUEL	Male	2	3	5	4	4
26	AGYEI RICHARD KWAME	Male	2	3	5	4	4
27	AGYEMAN DUAH BOATEMAA	Female	1	2	3	2	2
28	AGYEMAN PAUL BOAKYE	Male	2	3	5	4	4
29	ABOAGYE DAVID ADU	Male	2	3	5	4	4
30	AGYIRI GEORGINA	Female	1	2	3	2	2
31	AHIABLEY PORTIA	Female	1	2	3	2	2
32	AHONI MAUDLIN AYONGO	Female	1	2	3	2	2
33	ABOAGYE FELIX	Male	2	3	5	4	4
34	AKAGBO REBECCA	Female	1	2	3	2	2
35	AKOTO REINDOLF APPIAH	Male	2	3	5	4	4
36	AKUFFO GIDEON	Male	2	3	5	4	4
37	ABU ABDUL MANAF	Male	2	3	5	4	4
38	ALAGBO EMMANUEL	Male	2	3	5	4	4
39	ALLOTEY KPAKPO VINCENT	Male	2	3	5	4	4
40	ALLOTEY PEARL NAA AKU	Female	1	2	3	2	2
41	ABUBAKAR ARAFAT SUFYAN	Male	2	3	5	4	4
42	AMAKYE JAMES SARPONG	Male	2	3	5	4	4
43	AMEVOR ERIC	Male	2	3	5	4	4
44	AMOAH CHARLOTTE KORKOR	Female	1	2	3	2	2
45	ACHEAMPONG CHRISTABEL	Female	1	2	3	2	2
46	AMOAH MILDRED	Female	1	2	3	2	2
47	AMOAKO ERNESTINA OPOKUA	Female	1	2	3	2	2
48	AMPONSAH CECILIA ABENA	Female	1	2	3	2	2
49	ACHEAMPONG KINGSLEY	Male	2	3	5	4	4
50	AMUZU STELLA KABUKI	Female	1	2	3	2	2
51	ANABI MUSAH AHMED	Male	2	3	5	4	4
52	ANDERSON GIFTY	Female	1	2	3	2	2
53	ACHEAMPONG MICHAEL APPIAH	Male	2	3	5	4	4
54	ANDERSON VIVIAN	Female	1	2	3	2	2
55	ANKOMAH GEORGINA	Female	1	2	3	2	2
56	ANNANG FRANCISCA TORSHIE	Female	1	2	3	2	2
57	ACQUAH BENJAMIN	Male	2	3	5	4	4
58	ANNOR RICHAEL	Female	1	2	3	2	2
59	ANSAH FAUSTINA	Female	1	2	3	2	2
60	ANSAH MARFO DOREEN	Female	1	2	3	2	2
61	ACQUAH KINGSLEY OCANSEY	Male	2	3	5	4	4
62	ANTHONIO HENRIETTA	Female	1	2	3	2	2
63	APPIAH ISAAC	Male	2	3	5	4	4
64	APPIAH MOSES	Male	2	3	5	4	4
65	ACQUAH PHILIP	Male	2	3	5	4	4
66	APPIAH PRINCE KWESI	Male	2	3	5	4	4
67	ARKO HAGAR	Female	1	2	3	2	2
68	ARKOH GALAHAD AHINSAH	Female	1	2	3	2	2
69	ADAM HALIMATU SADIA	Female	1	2	3	2	2
70	ARTHUR EBENEZER	Male	2	3	5	4	4
71	ARTHUR ESSUMAN JAMES	Male	2	3	5	4	4
72	ARYEETEY MESHACK	Male	2	3	5	4	4
73	ADAMA-TETTEY MARYNSKY	Female	1	2	3	2	2
74	ASABIRE SOPHIA	Female	1	2	3	2	2
75	ASAHENE EMMANUELLA	Female	1	2	3	2	2
76	ASAMANY CARL	Male	2	3	5	4	4
77	ADAMS AFISHETU	Female	1	2	3	2	2
78	ASAMOAH MERCY	Female	1	2	3	2	2
79	ASARE ERIC AGYIRI AWERE	Male	2	3	5	4	4
80	ASHITEY MCZILL HAFIZ OKO	Male	2	3	5	4	4
81	ADAMS ANASS	Male	2	3	5	4	4
82	ASIEDU MAVIS	Female	1	2	3	2	2
83	ATIEMO JOSEPHINE	Female	1	2	3	2	2
84	AWUDER WILLIAM YAO	Male	2	3	5	4	4
85	ADARKWAH IRENE	Female	1	2	3	2	2
86	AYER PERCY OKAI	Male	2	3	5	4	4
87	AYISI BENJAMIN	Male	2	3	5	4	4
88	AZAMETSI MIRABLE	Female	1	2	3	2	2
89	ADDAE PORTIA	Female	1	2	3	2	2
90	BEDIAKO PRISCILLA ODURO	Female	1	2	3	2	2
91	BELLEY BETTY	Female	1	2	3	2	2
92	BOATEMAA SLYVIA	Female	1	2	3	2	2
93	ADDEY AUGUSTINE	Male	2	3	5	4	4
94	BOATENG ABRAHAM AMEGAVIE	Male	2	3	5	4	4
95	BONDZIE SAMUEL AIDOO	Male	2	3	5	4	4
96	BONI MAXWELL EDEM	Male	2	3	5	4	4
97	ADDICO FRANCIS AWULEY	Male	2	3	5	4	4
98	BOTCHWAY HANNAH	Female	1	2	3	2	2
99	BOTCHWAY JEMIMA ATSWEI	Female	1	2	3	2	2
100	BOTCHWAY MICHAEL	Male	2	3	5	4	4
101	ADDISON EMMANUEL	Male	2	3	5	4	4
102	BOYETEY SOLOMON BUERNOR	Male	2	3	5	4	4
103	BRENYAH SYLVESTER	Male	2	3	5	4	4
104	CLELAND VERA VASTU	Female	1	2	3	2	2
105	ADDISON STEPHEN EBO	Male	2	3	5	4	4
106	DADZIE ISAAC	Male	2	3	5	4	4
107	DAMALIE DEBORAH YAYRA	Female	1	2	3	2	2
108	DARKO MOSES	Male	2	3	5	4	4
109	ADDO NAOMI	Female	1	2	3	2	2
110	DARKOA DORA	Female	1	2	3	2	2
111	DENTAAH AMPOFO PATIENCE O.	Female	1	2	3	2	2
112	DJIDONU DANIEL KWESI	Male	2	3	5	4	4
113	ADDO PATIENCE	Female	1	2	3	2	2
114	DOE KENNEDY	Male	2	3	5	4	4
115	DOKU ESTHER MAKU	Female	1	2	3	2	2
116	DOWUONA PRISCILLA NORKAI	Female	1	2	3	2	2
117	ADDY MELIORA GENEVIEVE	Female	1	2	3	2	2
118	DZRAMADO SANDRA	Female	1	2	3	2	2
119	DZUFLE BRIDGET	Female	1	2	3	2	2
120	EDZEOU BERNARD	Male	2	3	5	4	4
121	ADEKPUITOR PETER	Male	2	3	5	4	4
122	ENTSIEH EVANS	Male	2	3	5	4	4
123	FOMETU GLADYS COURINE	Female	1	2	3	2	2
124	GANYO REBECCA EYRAM	Female	1	2	3	2	2
125	ADEKU CALEB KOJO	Male	2	3	5	4	4
126	GBADGO CHARLOTTE	Female	1	2	3	2	2
127	GODOMEY ABRAHAM	Male	2	3	5	4	4
128	GYAN FELICIA	Female	1	2	3	2	2
129	ADETI CLIFFORD KWABLA	Male	2	3	5	4	4
130	GYAN MANTEY	Male	2	3	5	4	4
131	GYEKYE EMMANUEL	Male	2	3	5	4	4
132	HAGAN EDWIN EBOH	Male	2	3	5	4	4
133	ADINKRAH ABIGAIL	Female	1	2	3	2	2
134	HAMMOND NATHANIEL	Male	2	3	5	4	4
135	IBRAHIM MOHAMMED SANUSI	Male	2	3	5	4	4
136	IBRAHIM SEMIRATU	Female	1	2	3	2	2
137	ADIOK JOSHUA ALLEN	Male	2	3	5	4	4
138	INUSAH MOHAMMED	Male	2	3	5	4	4
139	KABAH ALIAYIRE ALEX	Male	2	3	5	4	4
140	KELVIN NKANSAH	Male	2	3	5	4	4
141	ADJAKLOE FLOSSIE DZIFA	Female	1	2	3	2	2
142	KUDJUH BRIGHT DOSU	Male	2	3	5	4	4
143	KUMI DANIEL DARKO	Male	2	3	5	4	4
144	KUMI MARY POKUAA	Female	1	2	3	2	2
145	ADJASOO LINDA SELINAM	Female	1	2	3	2	2
146	KUSI LYDIA ADJOA ADJEIWAA	Female	1	2	3	2	2
147	KWARTENG JESSE SARPONG	Male	2	3	5	4	4
148	LANTEI- LAMPTEY JESSE NII	Male	2	3	5	4	4
149	ADJEI - BAAH STEPHEN	Male	2	3	5	4	4
150	MASOPEH FELICIA VANILLA NAA AMELEY	Female	1	2	3	2	2
151	MENDS FIDELIA APPIAH	Female	1	2	3	2	2
152	MENSAH BETTY TELUS	Female	1	2	3	2	2
153	ADJEI BELINDA ADJETEY	Female	1	2	3	2	2
154	MENSAH CHARLES GYAMFI	Male	2	3	5	4	4
155	MENSAH PHILOMINA TECHIE	Female	1	2	3	2	2
156	MENYE GODWIN JR	Male	2	3	5	4	4
157	ADJEI DANIEL	Male	2	3	5	4	4
158	MOHAMMED ADAM ZAKIYU	Male	2	3	5	4	4
159	NARTEH GEOFFREY	Male	2	3	5	4	4
160	NKANSAH LOCTUS ADJEI	Female	1	2	3	2	2
161	ADJEI HENRY	Male	2	3	5	4	4
162	NORTEY NICHOLAS	Male	2	3	5	4	4
163	NUAMAH SAMUEL	Male	2	3	5	4	4
164	NUKPE DAVID CONVERY	Male	2	3	5	4	4
165	ADJEI JENNIFER ODUA	Female	1	2	3	2	2
166	NYARKO ANISA	Female	1	2	3	2	2
167	NYARKO NICHOLAS	Male	2	3	5	4	4
168	NYARKO WILLIAM KWABENA	Male	2	3	5	4	4
169	ADJEIBEA RACHEAL	Female	1	2	3	2	2
170	NYEDU ISHMAEL	Male	2	3	5	4	4
171	OBENG JULIANA	Female	1	2	3	2	2
172	OBUOBI SOLOMON	Male	2	3	5	4	4
173	ADJETEY ERAMI NII ADJEI	Male	2	3	5	4	4
174	ODOI ERIC AKO	Male	2	3	5	4	4
175	OFFEI OSEI FRANCIS	Male	2	3	5	4	4
176	OPOKU SAMUEL	Male	2	3	5	4	4
177	ADJIN-TETTEY JEREMIAH	Male	2	3	5	4	4
178	OPOKUA GIFTY NANA AMA	Female	1	2	3	2	2
179	OSEI RICHMOND KOFI	Male	2	3	5	4	4
180	OUEDORAOGO ROGER PETER	Male	2	3	5	4	4
181	ADJOKATSE BERNICE	Female	1	2	3	2	2
182	OWUSU ALEX	Male	2	3	5	4	4
183	OWUSU-APENTENG STEPHEN	Male	2	3	5	4	4
184	PARRY JESSICA	Male	2	3	5	4	4
185	ADOM JENNIFER ESTHER OHENEBA	Female	1	2	3	2	2
186	QUAICOE ENOCH	Male	2	3	5	4	4
187	QUANSAH BELINDA	Female	1	2	3	2	2
188	QUARTEY EVELYN NAA KWARLEY	Female	1	2	3	2	2
189	ADOM KWADWO BOAKYE	Male	2	3	5	4	4
190	QUARTEY SALOMEY	Female	1	2	3	2	2
191	SAHEED AZEEZAT	Female	1	2	3	2	2
192	SHAIBU FAUZIYATU	Female	1	2	3	2	2
193	ADU BONA SUSANNA	Female	1	2	3	2	2
194	SOWAH ALEXANDRA ENYONAM	Female	1	2	3	2	2
195	SULLEY HINDU MUNIRU	Female	1	2	3	2	2
196	TAGOE DAVID	Male	2	3	5	4	4
197	ADU DORA	Female	1	2	3	2	2
198	TAWIAH ADAMA OKOE	Male	2	3	5	4	4
199	TETTEH KELVIN	Male	2	3	5	4	4
200	TETTEH MALVIN	Male	2	3	5	4	4
201	ADU PRISCILLA NKETIA	Female	1	2	3	2	2
202	WADIE LINDA NKANSAH	Female	1	2	3	2	2
203	WENOMA LINDA	Female	1	2	3	2	2
204	YARTEY SEFIATU	Female	1	2	3	2	2
205	ADU-AGYEI AWURA AKUA	Female	1	2	3	2	2
206	OWUSU ALEX	Male	2	3	5	4	4
207	OWUSU-APENTENG STEPHEN	Male	2	3	5	4	4
208	PARRY JESSICA	Male	2	3	5	4	4
209	ADU-TWUM FREDERICK ASANTE	Male	2	3	5	4	4
210	QUAICOE ENOCH	Male	2	3	5	4	4
211	QUANSAH BELINDA	Female	1	2	3	2	2
212	QUARTEY EVELYN NAA KWARLEY	Female	1	2	3	2	2
213	ADUSEI GIFTY YEBOAH	Female	1	2	3	2	2
214	QUARTEY SALOMEY	Female	1	2	3	2	2
215	SAHEED AZEEZAT	Female	1	2	3	2	2
216	SHAIBU FAUZIYATU	Female	1	2	3	2	2
217	ADUUM REBECCA	Female	1	2	3	2	2
218	AFARI STEPHEN	Male	2	3	5	4	4
219	AFOTEY PATRICK DUNYO	Male	2	3	5	4	4
220	AFRAH TRACY NTOW	Female	1	2	3	2	2
221	ABABIO ABEDNEGO A.	Male	2	3	5	4	4
222	ABOAGYE ELIZABETH BOADIWAA	Female	1	2	3	2	2
223	ABOE ANDREWS	Male	2	3	5	4	4
224	ABRAHAM-QUANSAH MARY EVA	Female	1	2	3	2	2
225	ABALEM JENNIFER	Female	1	2	3	2	2
226	ADDAE SANDRA	Female	1	2	3	2	2
227	ADJEI FREDERICK YAW	Male	2	3	5	4	4
228	ADJEI PRINCE BAFFOUR	Male	2	3	5	4	4
229	ABBAN VIDA OWUSU	Female	1	2	3	2	2
230	ADJEI SAMUEL	Male	2	3	5	4	4
231	ADJORLOLO MERCY NORKPLIM	Female	1	2	3	2	2
232	ADOCTOR VICTORIA	Female	1	2	3	2	2
233	ADU AFRIYIE	Male	2	3	5	4	4
234	ADU EMMANUEL	Male	2	3	5	4	4
235	ADZOWU MILLICENT	Female	1	2	3	2	2
236	AFORDE JAMES ABLORDE	Male	2	3	5	4	4
237	ABDALLAH FATIMATU	Female	1	2	3	2	2
238	AGBENYEGA STEPHEN	Male	2	3	5	4	4
239	AGBOGBA LANDRY KWAME	Male	2	3	5	4	4
240	AGGERH BARNABAS KOBBY	Male	2	3	5	4	4
241	ABDULAI FAIZA	Female	1	2	3	2	2
242	AGOE JEHOSHAPHAT SOWAH	Male	2	3	5	4	4
243	AGUDA NARKIE PATRICIA	Female	1	2	3	2	2
244	AGYARE PRISCILLA DARFOUR	Female	1	2	3	2	2
245	ABEKAH EMMANUEL	Male	2	3	5	4	4
246	AGYEI RICHARD KWAME	Male	2	3	5	4	4
247	AGYEMAN DUAH BOATEMAA	Female	1	2	3	2	2
248	AGYEMAN PAUL BOAKYE	Male	2	3	5	4	4
249	ABOAGYE DAVID ADU	Male	2	3	5	4	4
250	AGYIRI GEORGINA	Female	1	2	3	2	2
251	AHIABLEY PORTIA	Female	1	2	3	2	2
252	AHONI MAUDLIN AYONGO	Female	1	2	3	2	2
253	ABOAGYE FELIX	Male	2	3	5	4	4
254	AKAGBO REBECCA	Female	1	2	3	2	2
255	AKOTO REINDOLF APPIAH	Male	2	3	5	4	4
256	AKUFFO GIDEON	Male	2	3	5	4	4
257	ABU ABDUL MANAF	Male	2	3	5	4	4
258	ALAGBO EMMANUEL	Male	2	3	5	4	4
259	ALLOTEY KPAKPO VINCENT	Male	2	3	5	4	4
260	ALLOTEY PEARL NAA AKU	Female	1	2	3	2	2
261	ABUBAKAR ARAFAT SUFYAN	Male	2	3	5	4	4
262	AMAKYE JAMES SARPONG	Male	2	3	5	4	4
263	AMEVOR ERIC	Male	2	3	5	4	4
264	AMOAH CHARLOTTE KORKOR	Female	1	2	3	2	2
265	ACHEAMPONG CHRISTABEL	Female	1	2	3	2	2
266	AMOAH MILDRED	Female	1	2	3	2	2
267	AMOAKO ERNESTINA OPOKUA	Female	1	2	3	2	2
268	AMPONSAH CECILIA ABENA	Female	1	2	3	2	2
269	ACHEAMPONG KINGSLEY	Male	2	3	5	4	4
270	AMUZU STELLA KABUKI	Female	1	2	3	2	2
271	ANABI MUSAH AHMED	Male	2	3	5	4	4
272	ANDERSON GIFTY	Female	1	2	3	2	2
273	ACHEAMPONG MICHAEL APPIAH	Male	2	3	5	4	4
274	ANDERSON VIVIAN	Female	1	2	3	2	2
275	ANKOMAH GEORGINA	Female	1	2	3	2	2
276	ANNANG FRANCISCA TORSHIE	Female	1	2	3	2	2
277	ACQUAH BENJAMIN	Male	2	3	5	4	4
278	ANNOR RICHAEL	Female	1	2	3	2	2
279	ANSAH FAUSTINA	Female	1	2	3	2	2
280	ANSAH MARFO DOREEN	Female	1	2	3	2	2
281	ACQUAH KINGSLEY OCANSEY	Male	2	3	5	4	4
282	ANTHONIO HENRIETTA	Female	1	2	3	2	2
283	APPIAH ISAAC	Male	2	3	5	4	4
284	APPIAH MOSES	Male	2	3	5	4	4
285	ACQUAH PHILIP	Male	2	3	5	4	4
286	APPIAH PRINCE KWESI	Male	2	3	5	4	4
287	ARKO HAGAR	Female	1	2	3	2	2
288	ARKOH GALAHAD AHINSAH	Female	1	2	3	2	2
289	ADAM HALIMATU SADIA	Female	1	2	3	2	2
290	ARTHUR EBENEZER	Male	2	3	5	4	4
291	ARTHUR ESSUMAN JAMES	Male	2	3	5	4	4
292	ARYEETEY MESHACK	Male	2	3	5	4	4
293	ADAMA-TETTEY MARYNSKY	Female	1	2	3	2	2
294	ASABIRE SOPHIA	Female	1	2	3	2	2
295	ASAHENE EMMANUELLA	Female	1	2	3	2	2
296	ASAMANY CARL	Male	2	3	5	4	4
297	ADAMS AFISHETU	Female	1	2	3	2	2
298	ASAMOAH MERCY	Female	1	2	3	2	2
299	ASARE ERIC AGYIRI AWERE	Male	2	3	5	4	4
300	ASHITEY MCZILL HAFIZ OKO	Male	2	3	5	4	4
301	ADAMS ANASS	Male	2	3	5	4	4
302	ASIEDU MAVIS	Female	1	2	3	2	2
303	ATIEMO JOSEPHINE	Female	1	2	3	2	2
304	AWUDER WILLIAM YAO	Male	2	3	5	4	4
305	ADARKWAH IRENE	Female	1	2	3	2	2
306	AYER PERCY OKAI	Male	2	3	5	4	4
307	AYISI BENJAMIN	Male	2	3	5	4	4
308	AZAMETSI MIRABLE	Female	1	2	3	2	2
309	ADDAE PORTIA	Female	1	2	3	2	2
310	BEDIAKO PRISCILLA ODURO	Female	1	2	3	2	2
311	BELLEY BETTY	Female	1	2	3	2	2
312	BOATEMAA SLYVIA	Female	1	2	3	2	2
313	ADDEY AUGUSTINE	Male	2	3	5	4	4
314	BOATENG ABRAHAM AMEGAVIE	Male	2	3	5	4	4
315	BONDZIE SAMUEL AIDOO	Male	2	3	5	4	4
316	BONI MAXWELL EDEM	Male	2	3	5	4	4
317	ADDICO FRANCIS AWULEY	Male	2	3	5	4	4
318	BOTCHWAY HANNAH	Female	1	2	3	2	2
319	BOTCHWAY JEMIMA ATSWEI	Female	1	2	3	2	2
320	BOTCHWAY MICHAEL	Male	2	3	5	4	4
321	ADDISON EMMANUEL	Male	2	3	5	4	4
322	BOYETEY SOLOMON BUERNOR	Male	2	3	5	4	4
323	BRENYAH SYLVESTER	Male	2	3	5	4	4
324	CLELAND VERA VASTU	Female	1	2	3	2	2
325	ADDISON STEPHEN EBO	Male	2	3	5	4	4
326	DADZIE ISAAC	Male	2	3	5	4	4
327	DAMALIE DEBORAH YAYRA	Female	1	2	3	2	2
328	DARKO MOSES	Male	2	3	5	4	4
329	ADDO NAOMI	Female	1	2	3	2	2
330	DARKOA DORA	Female	1	2	3	2	2
331	DENTAAH AMPOFO PATIENCE O.	Female	1	2	3	2	2
332	DJIDONU DANIEL KWESI	Male	2	3	5	4	4
333	ADDO PATIENCE	Female	1	2	3	2	2
334	DOE KENNEDY	Male	2	3	5	4	4
335	DOKU ESTHER MAKU	Female	1	2	3	2	2
336	DOWUONA PRISCILLA NORKAI	Female	1	2	3	2	2
337	ADDY MELIORA GENEVIEVE	Female	1	2	3	2	2
338	DZRAMADO SANDRA	Female	1	2	3	2	2
339	DZUFLE BRIDGET	Female	1	2	3	2	2
340	EDZEOU BERNARD	Male	2	3	5	4	4
341	ADEKPUITOR PETER	Male	2	3	5	4	4
342	ENTSIEH EVANS	Male	2	3	5	4	4
343	FOMETU GLADYS COURINE	Female	1	2	3	2	2
344	GANYO REBECCA EYRAM	Female	1	2	3	2	2
345	ADEKU CALEB KOJO	Male	2	3	5	4	4
346	GBADGO CHARLOTTE	Female	1	2	3	2	2
347	GODOMEY ABRAHAM	Male	2	3	5	4	4
348	GYAN FELICIA	Female	1	2	3	2	2
349	ADETI CLIFFORD KWABLA	Male	2	3	5	4	4
350	GYAN MANTEY	Male	2	3	5	4	4
351	GYEKYE EMMANUEL	Male	2	3	5	4	4
352	HAGAN EDWIN EBOH	Male	2	3	5	4	4
353	ADINKRAH ABIGAIL	Female	1	2	3	2	2
354	HAMMOND NATHANIEL	Male	2	3	5	4	4
355	IBRAHIM MOHAMMED SANUSI	Male	2	3	5	4	4
356	IBRAHIM SEMIRATU	Female	1	2	3	2	2
357	ADIOK JOSHUA ALLEN	Male	2	3	5	4	4
358	INUSAH MOHAMMED	Male	2	3	5	4	4
359	KABAH ALIAYIRE ALEX	Male	2	3	5	4	4
360	KELVIN NKANSAH	Male	2	3	5	4	4
361	ADJAKLOE FLOSSIE DZIFA	Female	1	2	3	2	2
362	KUDJUH BRIGHT DOSU	Male	2	3	5	4	4
363	KUMI DANIEL DARKO	Male	2	3	5	4	4
364	KUMI MARY POKUAA	Female	1	2	3	2	2
365	ADJASOO LINDA SELINAM	Female	1	2	3	2	2
366	KUSI LYDIA ADJOA ADJEIWAA	Female	1	2	3	2	2
367	KWARTENG JESSE SARPONG	Male	2	3	5	4	4
368	LANTEI- LAMPTEY JESSE NII	Male	2	3	5	4	4
369	ADJEI - BAAH STEPHEN	Male	2	3	5	4	4
370	MASOPEH FELICIA VANILLA NAA AMELEY	Female	1	2	3	2	2
371	MENDS FIDELIA APPIAH	Female	1	2	3	2	2
372	MENSAH BETTY TELUS	Female	1	2	3	2	2
373	ADJEI BELINDA ADJETEY	Female	1	2	3	2	2
374	MENSAH CHARLES GYAMFI	Male	2	3	5	4	4
375	MENSAH PHILOMINA TECHIE	Female	1	2	3	2	2
376	MENYE GODWIN JR	Male	2	3	5	4	4
377	ADJEI DANIEL	Male	2	3	5	4	4
378	MOHAMMED ADAM ZAKIYU	Male	2	3	5	4	4
379	NARTEH GEOFFREY	Male	2	3	5	4	4
380	NKANSAH LOCTUS ADJEI	Female	1	2	3	2	2
381	ADJEI HENRY	Male	2	3	5	4	4
382	NORTEY NICHOLAS	Male	2	3	5	4	4
383	NUAMAH SAMUEL	Male	2	3	5	4	4
384	NUKPE DAVID CONVERY	Male	2	3	5	4	4
385	ADJEI JENNIFER ODUA	Female	1	2	3	2	2
386	NYARKO ANISA	Female	1	2	3	2	2
387	NYARKO NICHOLAS	Male	2	3	5	4	4
388	NYARKO WILLIAM KWABENA	Male	2	3	5	4	4
389	ADJEIBEA RACHEAL	Female	1	2	3	2	2
390	NYEDU ISHMAEL	Male	2	3	5	4	4
391	OBENG JULIANA	Female	1	2	3	2	2
392	OBUOBI SOLOMON	Male	2	3	5	4	4
393	ADJETEY ERAMI NII ADJEI	Male	2	3	5	4	4
394	ODOI ERIC AKO	Male	2	3	5	4	4
395	OFFEI OSEI FRANCIS	Male	2	3	5	4	4
396	OPOKU SAMUEL	Male	2	3	5	4	4
397	ADJIN-TETTEY JEREMIAH	Male	2	3	5	4	4
398	OPOKUA GIFTY NANA AMA	Female	1	2	3	2	2
399	OSEI RICHMOND KOFI	Male	2	3	5	4	4
400	OUEDORAOGO ROGER PETER	Male	2	3	5	4	4
401	ADJOKATSE BERNICE	Female	1	2	3	2	2
402	OWUSU ALEX	Male	2	3	5	4	4
403	OWUSU-APENTENG STEPHEN	Male	2	3	5	4	4
404	PARRY JESSICA	Male	2	3	5	4	4
405	ADOM JENNIFER ESTHER OHENEBA	Female	1	2	3	2	2
406	QUAICOE ENOCH	Male	2	3	5	4	4
407	QUANSAH BELINDA	Female	1	2	3	2	2
408	QUARTEY EVELYN NAA KWARLEY	Female	1	2	3	2	2
409	ADOM KWADWO BOAKYE	Male	2	3	5	4	4
410	QUARTEY SALOMEY	Female	1	2	3	2	2
411	SAHEED AZEEZAT	Female	1	2	3	2	2
412	SHAIBU FAUZIYATU	Female	1	2	3	2	2
413	ADU BONA SUSANNA	Female	1	2	3	2	2
414	SOWAH ALEXANDRA ENYONAM	Female	1	2	3	2	2
415	SULLEY HINDU MUNIRU	Female	1	2	3	2	2
416	TAGOE DAVID	Male	2	3	5	4	4
417	ADU DORA	Female	1	2	3	2	2
418	TAWIAH ADAMA OKOE	Male	2	3	5	4	4
419	TETTEH KELVIN	Male	2	3	5	4	4
420	TETTEH MALVIN	Male	2	3	5	4	4
421	ADU PRISCILLA NKETIA	Female	1	2	3	2	2
422	WADIE LINDA NKANSAH	Female	1	2	3	2	2
423	WENOMA LINDA	Female	1	2	3	2	2
424	YARTEY SEFIATU	Female	1	2	3	2	2
425	ADU-AGYEI AWURA AKUA	Female	1	2	3	2	2
426	OWUSU ALEX	Male	2	3	5	4	4
427	OWUSU-APENTENG STEPHEN	Male	2	3	5	4	4
428	PARRY JESSICA	Male	2	3	5	4	4
429	ADU-TWUM FREDERICK ASANTE	Male	2	3	5	4	4
430	QUAICOE ENOCH	Male	2	3	5	4	4
431	QUANSAH BELINDA	Female	1	2	3	2	2
432	QUARTEY EVELYN NAA KWARLEY	Female	1	2	3	2	2
433	ADUSEI GIFTY YEBOAH	Female	1	2	3	2	2
434	QUARTEY SALOMEY	Female	1	2	3	2	2
435	SAHEED AZEEZAT	Female	1	2	3	2	2
436	SHAIBU FAUZIYATU	Female	1	2	3	2	2
437	ADUUM REBECCA	Female	1	2	3	2	2
438	AFARI STEPHEN	Male	2	3	5	4	4
439	AFOTEY PATRICK DUNYO	Male	2	3	5	4	4
440	AFRAH TRACY NTOW	Female	1	2	3	2	2
441	ABABIO ABEDNEGO A.	Male	2	3	5	4	4
442	ABOAGYE ELIZABETH BOADIWAA	Female	1	2	3	2	2
443	ABOE ANDREWS	Male	2	3	5	4	4
444	ABRAHAM-QUANSAH MARY EVA	Female	1	2	3	2	2
445	ABALEM JENNIFER	Female	1	2	3	2	2
446	ADDAE SANDRA	Female	1	2	3	2	2
447	ADJEI FREDERICK YAW	Male	2	3	5	4	4
448	ADJEI PRINCE BAFFOUR	Male	2	3	5	4	4
449	ABBAN VIDA OWUSU	Female	1	2	3	2	2
450	ADJEI SAMUEL	Male	2	3	5	4	4
451	ADJORLOLO MERCY NORKPLIM	Female	1	2	3	2	2
452	ADOCTOR VICTORIA	Female	1	2	3	2	2
453	ADU AFRIYIE	Male	2	3	5	4	4
454	ADU EMMANUEL	Male	2	3	5	4	4
455	ADZOWU MILLICENT	Female	1	2	3	2	2
456	AFORDE JAMES ABLORDE	Male	2	3	5	4	4
457	ABDALLAH FATIMATU	Female	1	2	3	2	2
458	AGBENYEGA STEPHEN	Male	2	3	5	4	4
459	AGBOGBA LANDRY KWAME	Male	2	3	5	4	4
460	AGGERH BARNABAS KOBBY	Male	2	3	5	4	4
461	ABDULAI FAIZA	Female	1	2	3	2	2
462	AGOE JEHOSHAPHAT SOWAH	Male	2	3	5	4	4
463	AGUDA NARKIE PATRICIA	Female	1	2	3	2	2
464	AGYARE PRISCILLA DARFOUR	Female	1	2	3	2	2
465	ABEKAH EMMANUEL	Male	2	3	5	4	4
466	AGYEI RICHARD KWAME	Male	2	3	5	4	4
467	AGYEMAN DUAH BOATEMAA	Female	1	2	3	2	2
468	AGYEMAN PAUL BOAKYE	Male	2	3	5	4	4
469	ABOAGYE DAVID ADU	Male	2	3	5	4	4
470	AGYIRI GEORGINA	Female	1	2	3	2	2
471	AHIABLEY PORTIA	Female	1	2	3	2	2
472	AHONI MAUDLIN AYONGO	Female	1	2	3	2	2
473	ABOAGYE FELIX	Male	2	3	5	4	4
474	AKAGBO REBECCA	Female	1	2	3	2	2
475	AKOTO REINDOLF APPIAH	Male	2	3	5	4	4
476	AKUFFO GIDEON	Male	2	3	5	4	4
477	ABU ABDUL MANAF	Male	2	3	5	4	4
478	ALAGBO EMMANUEL	Male	2	3	5	4	4
479	ALLOTEY KPAKPO VINCENT	Male	2	3	5	4	4
480	ALLOTEY PEARL NAA AKU	Female	1	2	3	2	2
481	ABUBAKAR ARAFAT SUFYAN	Male	2	3	5	4	4
482	AMAKYE JAMES SARPONG	Male	2	3	5	4	4
483	AMEVOR ERIC	Male	2	3	5	4	4
484	AMOAH CHARLOTTE KORKOR	Female	1	2	3	2	2
485	ACHEAMPONG CHRISTABEL	Female	1	2	3	2	2
486	AMOAH MILDRED	Female	1	2	3	2	2
487	AMOAKO ERNESTINA OPOKUA	Female	1	2	3	2	2
488	AMPONSAH CECILIA ABENA	Female	1	2	3	2	2
489	ACHEAMPONG KINGSLEY	Male	2	3	5	4	4
490	AMUZU STELLA KABUKI	Female	1	2	3	2	2
491	ANABI MUSAH AHMED	Male	2	3	5	4	4
492	ANDERSON GIFTY	Female	1	2	3	2	2
493	ACHEAMPONG MICHAEL APPIAH	Male	2	3	5	4	4
494	ANDERSON VIVIAN	Female	1	2	3	2	2
495	ANKOMAH GEORGINA	Female	1	2	3	2	2
496	ANNANG FRANCISCA TORSHIE	Female	1	2	3	2	2
497	ACQUAH BENJAMIN	Male	2	3	5	4	4
498	ANNOR RICHAEL	Female	1	2	3	2	2
499	ANSAH FAUSTINA	Female	1	2	3	2	2
500	ANSAH MARFO DOREEN	Female	1	2	3	2	2
501	ACQUAH KINGSLEY OCANSEY	Male	2	3	5	4	4
502	ANTHONIO HENRIETTA	Female	1	2	3	2	2
503	APPIAH ISAAC	Male	2	3	5	4	4
504	APPIAH MOSES	Male	2	3	5	4	4
505	ACQUAH PHILIP	Male	2	3	5	4	4
506	APPIAH PRINCE KWESI	Male	2	3	5	4	4
507	ARKO HAGAR	Female	1	2	3	2	2
508	ARKOH GALAHAD AHINSAH	Female	1	2	3	2	2
509	ADAM HALIMATU SADIA	Female	1	2	3	2	2
510	ARTHUR EBENEZER	Male	2	3	5	4	4
511	ARTHUR ESSUMAN JAMES	Male	2	3	5	4	4
512	ARYEETEY MESHACK	Male	2	3	5	4	4
513	ADAMA-TETTEY MARYNSKY	Female	1	2	3	2	2
514	ASABIRE SOPHIA	Female	1	2	3	2	2
515	ASAHENE EMMANUELLA	Female	1	2	3	2	2
516	ASAMANY CARL	Male	2	3	5	4	4
517	ADAMS AFISHETU	Female	1	2	3	2	2
518	ASAMOAH MERCY	Female	1	2	3	2	2
519	ASARE ERIC AGYIRI AWERE	Male	2	3	5	4	4
520	ASHITEY MCZILL HAFIZ OKO	Male	2	3	5	4	4
521	ADAMS ANASS	Male	2	3	5	4	4
522	ASIEDU MAVIS	Female	1	2	3	2	2
523	ATIEMO JOSEPHINE	Female	1	2	3	2	2
524	AWUDER WILLIAM YAO	Male	2	3	5	4	4
525	ADARKWAH IRENE	Female	1	2	3	2	2
526	AYER PERCY OKAI	Male	2	3	5	4	4
527	AYISI BENJAMIN	Male	2	3	5	4	4
528	AZAMETSI MIRABLE	Female	1	2	3	2	2
529	ADDAE PORTIA	Female	1	2	3	2	2
530	BEDIAKO PRISCILLA ODURO	Female	1	2	3	2	2
531	BELLEY BETTY	Female	1	2	3	2	2
532	BOATEMAA SLYVIA	Female	1	2	3	2	2
533	ADDEY AUGUSTINE	Male	2	3	5	4	4
534	BOATENG ABRAHAM AMEGAVIE	Male	2	3	5	4	4
535	BONDZIE SAMUEL AIDOO	Male	2	3	5	4	4
536	BONI MAXWELL EDEM	Male	2	3	5	4	4
537	ADDICO FRANCIS AWULEY	Male	2	3	5	4	4
538	BOTCHWAY HANNAH	Female	1	2	3	2	2
539	BOTCHWAY JEMIMA ATSWEI	Female	1	2	3	2	2
540	BOTCHWAY MICHAEL	Male	2	3	5	4	4
541	ADDISON EMMANUEL	Male	2	3	5	4	4
542	BOYETEY SOLOMON BUERNOR	Male	2	3	5	4	4
543	BRENYAH SYLVESTER	Male	2	3	5	4	4
544	CLELAND VERA VASTU	Female	1	2	3	2	2
545	ADDISON STEPHEN EBO	Male	2	3	5	4	4
546	DADZIE ISAAC	Male	2	3	5	4	4
547	DAMALIE DEBORAH YAYRA	Female	1	2	3	2	2
548	DARKO MOSES	Male	2	3	5	4	4
549	ADDO NAOMI	Female	1	2	3	2	2
550	DARKOA DORA	Female	1	2	3	2	2
551	DENTAAH AMPOFO PATIENCE O.	Female	1	2	3	2	2
552	DJIDONU DANIEL KWESI	Male	2	3	5	4	4
553	ADDO PATIENCE	Female	1	2	3	2	2
554	DOE KENNEDY	Male	2	3	5	4	4
555	DOKU ESTHER MAKU	Female	1	2	3	2	2
556	DOWUONA PRISCILLA NORKAI	Female	1	2	3	2	2
557	ADDY MELIORA GENEVIEVE	Female	1	2	3	2	2
558	DZRAMADO SANDRA	Female	1	2	3	2	2
559	DZUFLE BRIDGET	Female	1	2	3	2	2
560	EDZEOU BERNARD	Male	2	3	5	4	4
561	ADEKPUITOR PETER	Male	2	3	5	4	4
562	ENTSIEH EVANS	Male	2	3	5	4	4
563	FOMETU GLADYS COURINE	Female	1	2	3	2	2
564	GANYO REBECCA EYRAM	Female	1	2	3	2	2
565	ADEKU CALEB KOJO	Male	2	3	5	4	4
566	GBADGO CHARLOTTE	Female	1	2	3	2	2
567	GODOMEY ABRAHAM	Male	2	3	5	4	4
568	GYAN FELICIA	Female	1	2	3	2	2
569	ADETI CLIFFORD KWABLA	Male	2	3	5	4	4
570	GYAN MANTEY	Male	2	3	5	4	4
571	GYEKYE EMMANUEL	Male	2	3	5	4	4
572	HAGAN EDWIN EBOH	Male	2	3	5	4	4
573	ADINKRAH ABIGAIL	Female	1	2	3	2	2
574	HAMMOND NATHANIEL	Male	2	3	5	4	4
575	IBRAHIM MOHAMMED SANUSI	Male	2	3	5	4	4
576	IBRAHIM SEMIRATU	Female	1	2	3	2	2
577	ADIOK JOSHUA ALLEN	Male	2	3	5	4	4
578	INUSAH MOHAMMED	Male	2	3	5	4	4
579	KABAH ALIAYIRE ALEX	Male	2	3	5	4	4
580	KELVIN NKANSAH	Male	2	3	5	4	4
581	ADJAKLOE FLOSSIE DZIFA	Female	1	2	3	2	2
582	KUDJUH BRIGHT DOSU	Male	2	3	5	4	4
583	KUMI DANIEL DARKO	Male	2	3	5	4	4
584	KUMI MARY POKUAA	Female	1	2	3	2	2
585	ADJASOO LINDA SELINAM	Female	1	2	3	2	2
586	KUSI LYDIA ADJOA ADJEIWAA	Female	1	2	3	2	2
587	KWARTENG JESSE SARPONG	Male	2	3	5	4	4
588	LANTEI- LAMPTEY JESSE NII	Male	2	3	5	4	4
589	ADJEI - BAAH STEPHEN	Male	2	3	5	4	4
590	MASOPEH FELICIA VANILLA NAA AMELEY	Female	1	2	3	2	2
591	MENDS FIDELIA APPIAH	Female	1	2	3	2	2
592	MENSAH BETTY TELUS	Female	1	2	3	2	2
593	ADJEI BELINDA ADJETEY	Female	1	2	3	2	2
594	MENSAH CHARLES GYAMFI	Male	2	3	5	4	4
595	MENSAH PHILOMINA TECHIE	Female	1	2	3	2	2
596	MENYE GODWIN JR	Male	2	3	5	4	4
597	ADJEI DANIEL	Male	2	3	5	4	4
598	MOHAMMED ADAM ZAKIYU	Male	2	3	5	4	4
599	NARTEH GEOFFREY	Male	2	3	5	4	4
600	NKANSAH LOCTUS ADJEI	Female	1	2	3	2	2
601	ADJEI HENRY	Male	2	3	5	4	4
602	NORTEY NICHOLAS	Male	2	3	5	4	4
603	NUAMAH SAMUEL	Male	2	3	5	4	4
604	NUKPE DAVID CONVERY	Male	2	3	5	4	4
605	ADJEI JENNIFER ODUA	Female	1	2	3	2	2
606	NYARKO ANISA	Female	1	2	3	2	2
607	NYARKO NICHOLAS	Male	2	3	5	4	4
608	NYARKO WILLIAM KWABENA	Male	2	3	5	4	4
609	ADJEIBEA RACHEAL	Female	1	2	3	2	2
610	NYEDU ISHMAEL	Male	2	3	5	4	4
611	OBENG JULIANA	Female	1	2	3	2	2
612	OBUOBI SOLOMON	Male	2	3	5	4	4
613	ADJETEY ERAMI NII ADJEI	Male	2	3	5	4	4
614	ODOI ERIC AKO	Male	2	3	5	4	4
615	OFFEI OSEI FRANCIS	Male	2	3	5	4	4
616	OPOKU SAMUEL	Male	2	3	5	4	4
617	ADJIN-TETTEY JEREMIAH	Male	2	3	5	4	4
618	OPOKUA GIFTY NANA AMA	Female	1	2	3	2	2
619	OSEI RICHMOND KOFI	Male	2	3	5	4	4
620	OUEDORAOGO ROGER PETER	Male	2	3	5	4	4
621	ADJOKATSE BERNICE	Female	1	2	3	2	2
622	OWUSU ALEX	Male	2	3	5	4	4
623	OWUSU-APENTENG STEPHEN	Male	2	3	5	4	4
624	PARRY JESSICA	Male	2	3	5	4	4
625	ADOM JENNIFER ESTHER OHENEBA	Female	1	2	3	2	2
626	QUAICOE ENOCH	Male	2	3	5	4	4
627	QUANSAH BELINDA	Female	1	2	3	2	2
628	QUARTEY EVELYN NAA KWARLEY	Female	1	2	3	2	2
629	ADOM KWADWO BOAKYE	Male	2	3	5	4	4
630	QUARTEY SALOMEY	Female	1	2	3	2	2
631	SAHEED AZEEZAT	Female	1	2	3	2	2
632	SHAIBU FAUZIYATU	Female	1	2	3	2	2
633	ADU BONA SUSANNA	Female	1	2	3	2	2
634	SOWAH ALEXANDRA ENYONAM	Female	1	2	3	2	2
635	SULLEY HINDU MUNIRU	Female	1	2	3	2	2
636	TAGOE DAVID	Male	2	3	5	4	4
637	ADU DORA	Female	1	2	3	2	2
638	TAWIAH ADAMA OKOE	Male	2	3	5	4	4
639	TETTEH KELVIN	Male	2	3	5	4	4
640	TETTEH MALVIN	Male	2	3	5	4	4
641	ADU PRISCILLA NKETIA	Female	1	2	3	2	2
642	WADIE LINDA NKANSAH	Female	1	2	3	2	2
643	WENOMA LINDA	Female	1	2	3	2	2
644	YARTEY SEFIATU	Female	1	2	3	2	2
645	ADU-AGYEI AWURA AKUA	Female	1	2	3	2	2
646	OWUSU ALEX	Male	2	3	5	4	4
647	OWUSU-APENTENG STEPHEN	Male	2	3	5	4	4
648	PARRY JESSICA	Male	2	3	5	4	4
649	ADU-TWUM FREDERICK ASANTE	Male	2	3	5	4	4
650	QUAICOE ENOCH	Male	2	3	5	4	4
651	QUANSAH BELINDA	Female	1	2	3	2	2
652	QUARTEY EVELYN NAA KWARLEY	Female	1	2	3	2	2
653	ADUSEI GIFTY YEBOAH	Female	1	2	3	2	2
654	QUARTEY SALOMEY	Female	1	2	3	2	2
655	SAHEED AZEEZAT	Female	1	2	3	2	2
656	SHAIBU FAUZIYATU	Female	1	2	3	2	2
657	ADUUM REBECCA	Female	1	2	3	2	2
658	AFARI STEPHEN	Male	2	3	5	4	4
659	AFOTEY PATRICK DUNYO	Male	2	3	5	4	4
660	AFRAH TRACY NTOW	Female	1	2	3	2	2
661	ABABIO ABEDNEGO A.	Male	2	3	5	4	4
662	ABOAGYE ELIZABETH BOADIWAA	Female	1	2	3	2	2
663	ABOE ANDREWS	Male	2	3	5	4	4
664	ABRAHAM-QUANSAH MARY EVA	Female	1	2	3	2	2
665	ABALEM JENNIFER	Female	1	2	3	2	2
666	ADDAE SANDRA	Female	1	2	3	2	2
667	ADJEI FREDERICK YAW	Male	2	3	5	4	4
668	ADJEI PRINCE BAFFOUR	Male	2	3	5	4	4
669	ABBAN VIDA OWUSU	Female	1	2	3	2	2
670	ADJEI SAMUEL	Male	2	3	5	4	4
671	ADJORLOLO MERCY NORKPLIM	Female	1	2	3	2	2
672	ADOCTOR VICTORIA	Female	1	2	3	2	2
673	ADU AFRIYIE	Male	2	3	5	4	4
674	ADU EMMANUEL	Male	2	3	5	4	4
675	ADZOWU MILLICENT	Female	1	2	3	2	2
676	AFORDE JAMES ABLORDE	Male	2	3	5	4	4
677	ABDALLAH FATIMATU	Female	1	2	3	2	2
678	AGBENYEGA STEPHEN	Male	2	3	5	4	4
679	AGBOGBA LANDRY KWAME	Male	2	3	5	4	4
680	AGGERH BARNABAS KOBBY	Male	2	3	5	4	4
681	ABDULAI FAIZA	Female	1	2	3	2	2
682	AGOE JEHOSHAPHAT SOWAH	Male	2	3	5	4	4
683	AGUDA NARKIE PATRICIA	Female	1	2	3	2	2
684	AGYARE PRISCILLA DARFOUR	Female	1	2	3	2	2
685	ABEKAH EMMANUEL	Male	2	3	5	4	4
686	AGYEI RICHARD KWAME	Male	2	3	5	4	4
687	AGYEMAN DUAH BOATEMAA	Female	1	2	3	2	2
688	AGYEMAN PAUL BOAKYE	Male	2	3	5	4	4
689	ABOAGYE DAVID ADU	Male	2	3	5	4	4
690	AGYIRI GEORGINA	Female	1	2	3	2	2
691	AHIABLEY PORTIA	Female	1	2	3	2	2
692	AHONI MAUDLIN AYONGO	Female	1	2	3	2	2
693	ABOAGYE FELIX	Male	2	3	5	4	4
694	AKAGBO REBECCA	Female	1	2	3	2	2
695	AKOTO REINDOLF APPIAH	Male	2	3	5	4	4
696	AKUFFO GIDEON	Male	2	3	5	4	4
697	ABU ABDUL MANAF	Male	2	3	5	4	4
698	ALAGBO EMMANUEL	Male	2	3	5	4	4
699	ALLOTEY KPAKPO VINCENT	Male	2	3	5	4	4
700	ALLOTEY PEARL NAA AKU	Female	1	2	3	2	2
701	ABUBAKAR ARAFAT SUFYAN	Male	2	3	5	4	4
702	AMAKYE JAMES SARPONG	Male	2	3	5	4	4
703	AMEVOR ERIC	Male	2	3	5	4	4
704	AMOAH CHARLOTTE KORKOR	Female	1	2	3	2	2
705	ACHEAMPONG CHRISTABEL	Female	1	2	3	2	2
706	AMOAH MILDRED	Female	1	2	3	2	2
707	AMOAKO ERNESTINA OPOKUA	Female	1	2	3	2	2
708	AMPONSAH CECILIA ABENA	Female	1	2	3	2	2
709	ACHEAMPONG KINGSLEY	Male	2	3	5	4	4
710	AMUZU STELLA KABUKI	Female	1	2	3	2	2
711	ANABI MUSAH AHMED	Male	2	3	5	4	4
712	ANDERSON GIFTY	Female	1	2	3	2	2
713	ACHEAMPONG MICHAEL APPIAH	Male	2	3	5	4	4
714	ANDERSON VIVIAN	Female	1	2	3	2	2
715	ANKOMAH GEORGINA	Female	1	2	3	2	2
716	ANNANG FRANCISCA TORSHIE	Female	1	2	3	2	2
717	ACQUAH BENJAMIN	Male	2	3	5	4	4
718	ANNOR RICHAEL	Female	1	2	3	2	2
719	ANSAH FAUSTINA	Female	1	2	3	2	2
720	ANSAH MARFO DOREEN	Female	1	2	3	2	2
721	ACQUAH KINGSLEY OCANSEY	Male	2	3	5	4	4
722	ANTHONIO HENRIETTA	Female	1	2	3	2	2
723	APPIAH ISAAC	Male	2	3	5	4	4
724	APPIAH MOSES	Male	2	3	5	4	4
725	ACQUAH PHILIP	Male	2	3	5	4	4
726	APPIAH PRINCE KWESI	Male	2	3	5	4	4
727	ARKO HAGAR	Female	1	2	3	2	2
728	ARKOH GALAHAD AHINSAH	Female	1	2	3	2	2
729	ADAM HALIMATU SADIA	Female	1	2	3	2	2
730	ARTHUR EBENEZER	Male	2	3	5	4	4
731	ARTHUR ESSUMAN JAMES	Male	2	3	5	4	4
732	ARYEETEY MESHACK	Male	2	3	5	4	4
733	ADAMA-TETTEY MARYNSKY	Female	1	2	3	2	2
734	ASABIRE SOPHIA	Female	1	2	3	2	2
735	ASAHENE EMMANUELLA	Female	1	2	3	2	2
736	ASAMANY CARL	Male	2	3	5	4	4
737	ADAMS AFISHETU	Female	1	2	3	2	2
738	ASAMOAH MERCY	Female	1	2	3	2	2
739	ASARE ERIC AGYIRI AWERE	Male	2	3	5	4	4
740	ASHITEY MCZILL HAFIZ OKO	Male	2	3	5	4	4
741	ADAMS ANASS	Male	2	3	5	4	4
742	ASIEDU MAVIS	Female	1	2	3	2	2
743	ATIEMO JOSEPHINE	Female	1	2	3	2	2
744	AWUDER WILLIAM YAO	Male	2	3	5	4	4
745	ADARKWAH IRENE	Female	1	2	3	2	2
746	AYER PERCY OKAI	Male	2	3	5	4	4
747	AYISI BENJAMIN	Male	2	3	5	4	4
748	AZAMETSI MIRABLE	Female	1	2	3	2	2
749	ADDAE PORTIA	Female	1	2	3	2	2
750	BEDIAKO PRISCILLA ODURO	Female	1	2	3	2	2
751	BELLEY BETTY	Female	1	2	3	2	2
752	BOATEMAA SLYVIA	Female	1	2	3	2	2
753	ADDEY AUGUSTINE	Male	2	3	5	4	4
754	BOATENG ABRAHAM AMEGAVIE	Male	2	3	5	4	4
755	BONDZIE SAMUEL AIDOO	Male	2	3	5	4	4
756	BONI MAXWELL EDEM	Male	2	3	5	4	4
757	ADDICO FRANCIS AWULEY	Male	2	3	5	4	4
758	BOTCHWAY HANNAH	Female	1	2	3	2	2
759	BOTCHWAY JEMIMA ATSWEI	Female	1	2	3	2	2
760	BOTCHWAY MICHAEL	Male	2	3	5	4	4
761	ADDISON EMMANUEL	Male	2	3	5	4	4
762	BOYETEY SOLOMON BUERNOR	Male	2	3	5	4	4
763	BRENYAH SYLVESTER	Male	2	3	5	4	4
764	CLELAND VERA VASTU	Female	1	2	3	2	2
765	ADDISON STEPHEN EBO	Male	2	3	5	4	4
766	DADZIE ISAAC	Male	2	3	5	4	4
767	DAMALIE DEBORAH YAYRA	Female	1	2	3	2	2
768	DARKO MOSES	Male	2	3	5	4	4
769	ADDO NAOMI	Female	1	2	3	2	2
770	DARKOA DORA	Female	1	2	3	2	2
771	DENTAAH AMPOFO PATIENCE O.	Female	1	2	3	2	2
772	DJIDONU DANIEL KWESI	Male	2	3	5	4	4
773	ADDO PATIENCE	Female	1	2	3	2	2
774	DOE KENNEDY	Male	2	3	5	4	4
775	DOKU ESTHER MAKU	Female	1	2	3	2	2
776	DOWUONA PRISCILLA NORKAI	Female	1	2	3	2	2
777	ADDY MELIORA GENEVIEVE	Female	1	2	3	2	2
778	DZRAMADO SANDRA	Female	1	2	3	2	2
779	DZUFLE BRIDGET	Female	1	2	3	2	2
780	EDZEOU BERNARD	Male	2	3	5	4	4
781	ADEKPUITOR PETER	Male	2	3	5	4	4
782	ENTSIEH EVANS	Male	2	3	5	4	4
783	FOMETU GLADYS COURINE	Female	1	2	3	2	2
784	GANYO REBECCA EYRAM	Female	1	2	3	2	2
785	ADEKU CALEB KOJO	Male	2	3	5	4	4
786	GBADGO CHARLOTTE	Female	1	2	3	2	2
787	GODOMEY ABRAHAM	Male	2	3	5	4	4
788	GYAN FELICIA	Female	1	2	3	2	2
789	ADETI CLIFFORD KWABLA	Male	2	3	5	4	4
790	GYAN MANTEY	Male	2	3	5	4	4
791	GYEKYE EMMANUEL	Male	2	3	5	4	4
792	HAGAN EDWIN EBOH	Male	2	3	5	4	4
793	ADINKRAH ABIGAIL	Female	1	2	3	2	2
794	HAMMOND NATHANIEL	Male	2	3	5	4	4
795	IBRAHIM MOHAMMED SANUSI	Male	2	3	5	4	4
796	IBRAHIM SEMIRATU	Female	1	2	3	2	2
797	ADIOK JOSHUA ALLEN	Male	2	3	5	4	4
798	INUSAH MOHAMMED	Male	2	3	5	4	4
799	KABAH ALIAYIRE ALEX	Male	2	3	5	4	4
800	KELVIN NKANSAH	Male	2	3	5	4	4
801	ADJAKLOE FLOSSIE DZIFA	Female	1	2	3	2	2
802	KUDJUH BRIGHT DOSU	Male	2	3	5	4	4
803	KUMI DANIEL DARKO	Male	2	3	5	4	4
804	KUMI MARY POKUAA	Female	1	2	3	2	2
805	ADJASOO LINDA SELINAM	Female	1	2	3	2	2
806	KUSI LYDIA ADJOA ADJEIWAA	Female	1	2	3	2	2
807	KWARTENG JESSE SARPONG	Male	2	3	5	4	4
808	LANTEI- LAMPTEY JESSE NII	Male	2	3	5	4	4
809	ADJEI - BAAH STEPHEN	Male	2	3	5	4	4
810	MASOPEH FELICIA VANILLA NAA AMELEY	Female	1	2	3	2	2
811	MENDS FIDELIA APPIAH	Female	1	2	3	2	2
812	MENSAH BETTY TELUS	Female	1	2	3	2	2
813	ADJEI BELINDA ADJETEY	Female	1	2	3	2	2
814	MENSAH CHARLES GYAMFI	Male	2	3	5	4	4
815	MENSAH PHILOMINA TECHIE	Female	1	2	3	2	2
816	MENYE GODWIN JR	Male	2	3	5	4	4
817	ADJEI DANIEL	Male	2	3	5	4	4
818	MOHAMMED ADAM ZAKIYU	Male	2	3	5	4	4
819	NARTEH GEOFFREY	Male	2	3	5	4	4
820	NKANSAH LOCTUS ADJEI	Female	1	2	3	2	2
821	ADJEI HENRY	Male	2	3	5	4	4
822	NORTEY NICHOLAS	Male	2	3	5	4	4
823	NUAMAH SAMUEL	Male	2	3	5	4	4
824	NUKPE DAVID CONVERY	Male	2	3	5	4	4
825	ADJEI JENNIFER ODUA	Female	1	2	3	2	2
826	NYARKO ANISA	Female	1	2	3	2	2
827	NYARKO NICHOLAS	Male	2	3	5	4	4
828	NYARKO WILLIAM KWABENA	Male	2	3	5	4	4
829	ADJEIBEA RACHEAL	Female	1	2	3	2	2
830	NYEDU ISHMAEL	Male	2	3	5	4	4
831	OBENG JULIANA	Female	1	2	3	2	2
832	OBUOBI SOLOMON	Male	2	3	5	4	4
833	ADJETEY ERAMI NII ADJEI	Male	2	3	5	4	4
834	ODOI ERIC AKO	Male	2	3	5	4	4
835	OFFEI OSEI FRANCIS	Male	2	3	5	4	4
836	OPOKU SAMUEL	Male	2	3	5	4	4
837	ADJIN-TETTEY JEREMIAH	Male	2	3	5	4	4
838	OPOKUA GIFTY NANA AMA	Female	1	2	3	2	2
839	OSEI RICHMOND KOFI	Male	2	3	5	4	4
840	OUEDORAOGO ROGER PETER	Male	2	3	5	4	4
841	ADJOKATSE BERNICE	Female	1	2	3	2	2
842	OWUSU ALEX	Male	2	3	5	4	4
843	OWUSU-APENTENG STEPHEN	Male	2	3	5	4	4
844	PARRY JESSICA	Male	2	3	5	4	4
845	ADOM JENNIFER ESTHER OHENEBA	Female	1	2	3	2	2
846	QUAICOE ENOCH	Male	2	3	5	4	4
847	QUANSAH BELINDA	Female	1	2	3	2	2
848	QUARTEY EVELYN NAA KWARLEY	Female	1	2	3	2	2
849	ADOM KWADWO BOAKYE	Male	2	3	5	4	4
850	QUARTEY SALOMEY	Female	1	2	3	2	2
851	SAHEED AZEEZAT	Female	1	2	3	2	2
852	SHAIBU FAUZIYATU	Female	1	2	3	2	2
853	ADU BONA SUSANNA	Female	1	2	3	2	2
854	SOWAH ALEXANDRA ENYONAM	Female	1	2	3	2	2
855	SULLEY HINDU MUNIRU	Female	1	2	3	2	2
856	TAGOE DAVID	Male	2	3	5	4	4
857	ADU DORA	Female	1	2	3	2	2
858	TAWIAH ADAMA OKOE	Male	2	3	5	4	4
859	TETTEH KELVIN	Male	2	3	5	4	4
860	TETTEH MALVIN	Male	2	3	5	4	4
861	ADU PRISCILLA NKETIA	Female	1	2	3	2	2
862	WADIE LINDA NKANSAH	Female	1	2	3	2	2
863	WENOMA LINDA	Female	1	2	3	2	2
864	YARTEY SEFIATU	Female	1	2	3	2	2
865	ADU-AGYEI AWURA AKUA	Female	1	2	3	2	2
866	OWUSU ALEX	Male	2	3	5	4	4
867	OWUSU-APENTENG STEPHEN	Male	2	3	5	4	4
868	PARRY JESSICA	Male	2	3	5	4	4
869	ADU-TWUM FREDERICK ASANTE	Male	2	3	5	4	4
870	QUAICOE ENOCH	Male	2	3	5	4	4
871	QUANSAH BELINDA	Female	1	2	3	2	2
872	QUARTEY EVELYN NAA KWARLEY	Female	1	2	3	2	2
873	ADUSEI GIFTY YEBOAH	Female	1	2	3	2	2
874	QUARTEY SALOMEY	Female	1	2	3	2	2
875	SAHEED AZEEZAT	Female	1	2	3	2	2
876	SHAIBU FAUZIYATU	Female	1	2	3	2	2
877	ADUUM REBECCA	Female	1	2	3	2	2
878	AFARI STEPHEN	Male	2	3	5	4	4
879	AFOTEY PATRICK DUNYO	Male	2	3	5	4	4
880	AFRAH TRACY NTOW	Female	1	2	3	2	2
881	ABABIO ABEDNEGO A.	Male	2	3	5	4	4
882	ABOAGYE ELIZABETH BOADIWAA	Female	1	2	3	2	2
883	ABOE ANDREWS	Male	2	3	5	4	4
884	ABRAHAM-QUANSAH MARY EVA	Female	1	2	3	2	2
885	ABALEM JENNIFER	Female	1	2	3	2	2
886	ADDAE SANDRA	Female	1	2	3	2	2
887	ADJEI FREDERICK YAW	Male	2	3	5	4	4
888	ADJEI PRINCE BAFFOUR	Male	2	3	5	4	4
889	ABBAN VIDA OWUSU	Female	1	2	3	2	2
890	ADJEI SAMUEL	Male	2	3	5	4	4
891	ADJORLOLO MERCY NORKPLIM	Female	1	2	3	2	2
892	ADOCTOR VICTORIA	Female	1	2	3	2	2
893	ADU AFRIYIE	Male	2	3	5	4	4
894	ADU EMMANUEL	Male	2	3	5	4	4
895	ADZOWU MILLICENT	Female	1	2	3	2	2
896	AFORDE JAMES ABLORDE	Male	2	3	5	4	4
897	ABDALLAH FATIMATU	Female	1	2	3	2	2
898	AGBENYEGA STEPHEN	Male	2	3	5	4	4
899	AGBOGBA LANDRY KWAME	Male	2	3	5	4	4
900	AGGERH BARNABAS KOBBY	Male	2	3	5	4	4
901	ABDULAI FAIZA	Female	1	2	3	2	2
902	AGOE JEHOSHAPHAT SOWAH	Male	2	3	5	4	4
903	AGUDA NARKIE PATRICIA	Female	1	2	3	2	2
904	AGYARE PRISCILLA DARFOUR	Female	1	2	3	2	2
905	ABEKAH EMMANUEL	Male	2	3	5	4	4
906	AGYEI RICHARD KWAME	Male	2	3	5	4	4
907	AGYEMAN DUAH BOATEMAA	Female	1	2	3	2	2
908	AGYEMAN PAUL BOAKYE	Male	2	3	5	4	4
909	ABOAGYE DAVID ADU	Male	2	3	5	4	4
910	AGYIRI GEORGINA	Female	1	2	3	2	2
911	AHIABLEY PORTIA	Female	1	2	3	2	2
912	AHONI MAUDLIN AYONGO	Female	1	2	3	2	2
913	ABOAGYE FELIX	Male	2	3	5	4	4
914	AKAGBO REBECCA	Female	1	2	3	2	2
915	AKOTO REINDOLF APPIAH	Male	2	3	5	4	4
916	AKUFFO GIDEON	Male	2	3	5	4	4
917	ABU ABDUL MANAF	Male	2	3	5	4	4
918	ALAGBO EMMANUEL	Male	2	3	5	4	4
919	ALLOTEY KPAKPO VINCENT	Male	2	3	5	4	4
920	ALLOTEY PEARL NAA AKU	Female	1	2	3	2	2
921	ABUBAKAR ARAFAT SUFYAN	Male	2	3	5	4	4
922	AMAKYE JAMES SARPONG	Male	2	3	5	4	4
923	AMEVOR ERIC	Male	2	3	5	4	4
924	AMOAH CHARLOTTE KORKOR	Female	1	2	3	2	2
925	ACHEAMPONG CHRISTABEL	Female	1	2	3	2	2
926	AMOAH MILDRED	Female	1	2	3	2	2
927	AMOAKO ERNESTINA OPOKUA	Female	1	2	3	2	2
928	AMPONSAH CECILIA ABENA	Female	1	2	3	2	2
929	ACHEAMPONG KINGSLEY	Male	2	3	5	4	4
930	AMUZU STELLA KABUKI	Female	1	2	3	2	2
931	ANABI MUSAH AHMED	Male	2	3	5	4	4
932	ANDERSON GIFTY	Female	1	2	3	2	2
933	ACHEAMPONG MICHAEL APPIAH	Male	2	3	5	4	4
934	ANDERSON VIVIAN	Female	1	2	3	2	2
935	ANKOMAH GEORGINA	Female	1	2	3	2	2
936	ANNANG FRANCISCA TORSHIE	Female	1	2	3	2	2
937	ACQUAH BENJAMIN	Male	2	3	5	4	4
938	ANNOR RICHAEL	Female	1	2	3	2	2
939	ANSAH FAUSTINA	Female	1	2	3	2	2
940	ANSAH MARFO DOREEN	Female	1	2	3	2	2
941	ACQUAH KINGSLEY OCANSEY	Male	2	3	5	4	4
942	ANTHONIO HENRIETTA	Female	1	2	3	2	2
943	APPIAH ISAAC	Male	2	3	5	4	4
944	APPIAH MOSES	Male	2	3	5	4	4
945	ACQUAH PHILIP	Male	2	3	5	4	4
946	APPIAH PRINCE KWESI	Male	2	3	5	4	4
947	ARKO HAGAR	Female	1	2	3	2	2
948	ARKOH GALAHAD AHINSAH	Female	1	2	3	2	2
949	ADAM HALIMATU SADIA	Female	1	2	3	2	2
950	ARTHUR EBENEZER	Male	2	3	5	4	4
951	ARTHUR ESSUMAN JAMES	Male	2	3	5	4	4
952	ARYEETEY MESHACK	Male	2	3	5	4	4
953	ADAMA-TETTEY MARYNSKY	Female	1	2	3	2	2
954	ASABIRE SOPHIA	Female	1	2	3	2	2
955	ASAHENE EMMANUELLA	Female	1	2	3	2	2
956	ASAMANY CARL	Male	2	3	5	4	4
957	ADAMS AFISHETU	Female	1	2	3	2	2
958	ASAMOAH MERCY	Female	1	2	3	2	2
959	ASARE ERIC AGYIRI AWERE	Male	2	3	5	4	4
960	ASHITEY MCZILL HAFIZ OKO	Male	2	3	5	4	4
961	ADAMS ANASS	Male	2	3	5	4	4
962	ASIEDU MAVIS	Female	1	2	3	2	2
963	ATIEMO JOSEPHINE	Female	1	2	3	2	2
964	AWUDER WILLIAM YAO	Male	2	3	5	4	4
965	ADARKWAH IRENE	Female	1	2	3	2	2
966	AYER PERCY OKAI	Male	2	3	5	4	4
967	AYISI BENJAMIN	Male	2	3	5	4	4
968	AZAMETSI MIRABLE	Female	1	2	3	2	2
969	ADDAE PORTIA	Female	1	2	3	2	2
970	BEDIAKO PRISCILLA ODURO	Female	1	2	3	2	2
971	BELLEY BETTY	Female	1	2	3	2	2
972	BOATEMAA SLYVIA	Female	1	2	3	2	2
973	ADDEY AUGUSTINE	Male	2	3	5	4	4
974	BOATENG ABRAHAM AMEGAVIE	Male	2	3	5	4	4
975	BONDZIE SAMUEL AIDOO	Male	2	3	5	4	4
976	BONI MAXWELL EDEM	Male	2	3	5	4	4
977	ADDICO FRANCIS AWULEY	Male	2	3	5	4	4
978	BOTCHWAY HANNAH	Female	1	2	3	2	2
979	BOTCHWAY JEMIMA ATSWEI	Female	1	2	3	2	2
980	BOTCHWAY MICHAEL	Male	2	3	5	4	4
981	ADDISON EMMANUEL	Male	2	3	5	4	4
982	BOYETEY SOLOMON BUERNOR	Male	2	3	5	4	4
983	BRENYAH SYLVESTER	Male	2	3	5	4	4
984	CLELAND VERA VASTU	Female	1	2	3	2	2
985	ADDISON STEPHEN EBO	Male	2	3	5	4	4
986	DADZIE ISAAC	Male	2	3	5	4	4
987	DAMALIE DEBORAH YAYRA	Female	1	2	3	2	2
988	DARKO MOSES	Male	2	3	5	4	4
989	ADDO NAOMI	Female	1	2	3	2	2
990	DARKOA DORA	Female	1	2	3	2	2
991	DENTAAH AMPOFO PATIENCE O.	Female	1	2	3	2	2
992	DJIDONU DANIEL KWESI	Male	2	3	5	4	4
993	ADDO PATIENCE	Female	1	2	3	2	2
994	DOE KENNEDY	Male	2	3	5	4	4
995	DOKU ESTHER MAKU	Female	1	2	3	2	2
996	DOWUONA PRISCILLA NORKAI	Female	1	2	3	2	2
997	ADDY MELIORA GENEVIEVE	Female	1	2	3	2	2
998	DZRAMADO SANDRA	Female	1	2	3	2	2
999	DZUFLE BRIDGET	Female	1	2	3	2	2
1000	EDZEOU BERNARD	Male	2	3	5	4	4
1001	ADEKPUITOR PETER	Male	2	3	5	4	4
1002	ENTSIEH EVANS	Male	2	3	5	4	4
1003	FOMETU GLADYS COURINE	Female	1	2	3	2	2
1004	GANYO REBECCA EYRAM	Female	1	2	3	2	2
1005	ADEKU CALEB KOJO	Male	2	3	5	4	4
1006	GBADGO CHARLOTTE	Female	1	2	3	2	2
1007	GODOMEY ABRAHAM	Male	2	3	5	4	4
1008	GYAN FELICIA	Female	1	2	3	2	2
1009	ADETI CLIFFORD KWABLA	Male	2	3	5	4	4
1010	GYAN MANTEY	Male	2	3	5	4	4
1011	GYEKYE EMMANUEL	Male	2	3	5	4	4
1012	HAGAN EDWIN EBOH	Male	2	3	5	4	4
1013	ADINKRAH ABIGAIL	Female	1	2	3	2	2
1014	HAMMOND NATHANIEL	Male	2	3	5	4	4
1015	IBRAHIM MOHAMMED SANUSI	Male	2	3	5	4	4
1016	IBRAHIM SEMIRATU	Female	1	2	3	2	2
1017	ADIOK JOSHUA ALLEN	Male	2	3	5	4	4
1018	INUSAH MOHAMMED	Male	2	3	5	4	4
1019	KABAH ALIAYIRE ALEX	Male	2	3	5	4	4
1020	KELVIN NKANSAH	Male	2	3	5	4	4
1021	ADJAKLOE FLOSSIE DZIFA	Female	1	2	3	2	2
1022	KUDJUH BRIGHT DOSU	Male	2	3	5	4	4
1023	KUMI DANIEL DARKO	Male	2	3	5	4	4
1024	KUMI MARY POKUAA	Female	1	2	3	2	2
1025	ADJASOO LINDA SELINAM	Female	1	2	3	2	2
1026	KUSI LYDIA ADJOA ADJEIWAA	Female	1	2	3	2	2
1027	KWARTENG JESSE SARPONG	Male	2	3	5	4	4
1028	LANTEI- LAMPTEY JESSE NII	Male	2	3	5	4	4
1029	ADJEI - BAAH STEPHEN	Male	2	3	5	4	4
1030	MASOPEH FELICIA VANILLA NAA AMELEY	Female	1	2	3	2	2
1031	MENDS FIDELIA APPIAH	Female	1	2	3	2	2
1032	MENSAH BETTY TELUS	Female	1	2	3	2	2
1033	ADJEI BELINDA ADJETEY	Female	1	2	3	2	2
1034	MENSAH CHARLES GYAMFI	Male	2	3	5	4	4
1035	MENSAH PHILOMINA TECHIE	Female	1	2	3	2	2
1036	MENYE GODWIN JR	Male	2	3	5	4	4
1037	ADJEI DANIEL	Male	2	3	5	4	4
1038	MOHAMMED ADAM ZAKIYU	Male	2	3	5	4	4
1039	NARTEH GEOFFREY	Male	2	3	5	4	4
1040	NKANSAH LOCTUS ADJEI	Female	1	2	3	2	2
1041	ADJEI HENRY	Male	2	3	5	4	4
1042	NORTEY NICHOLAS	Male	2	3	5	4	4
1043	NUAMAH SAMUEL	Male	2	3	5	4	4
1044	NUKPE DAVID CONVERY	Male	2	3	5	4	4
1045	ADJEI JENNIFER ODUA	Female	1	2	3	2	2
1046	NYARKO ANISA	Female	1	2	3	2	2
1047	NYARKO NICHOLAS	Male	2	3	5	4	4
1048	NYARKO WILLIAM KWABENA	Male	2	3	5	4	4
1049	ADJEIBEA RACHEAL	Female	1	2	3	2	2
1050	NYEDU ISHMAEL	Male	2	3	5	4	4
1051	OBENG JULIANA	Female	1	2	3	2	2
1052	OBUOBI SOLOMON	Male	2	3	5	4	4
1053	ADJETEY ERAMI NII ADJEI	Male	2	3	5	4	4
1054	ODOI ERIC AKO	Male	2	3	5	4	4
1055	OFFEI OSEI FRANCIS	Male	2	3	5	4	4
1056	OPOKU SAMUEL	Male	2	3	5	4	4
1057	ADJIN-TETTEY JEREMIAH	Male	2	3	5	4	4
1058	OPOKUA GIFTY NANA AMA	Female	1	2	3	2	2
1059	OSEI RICHMOND KOFI	Male	2	3	5	4	4
1060	OUEDORAOGO ROGER PETER	Male	2	3	5	4	4
1061	ADJOKATSE BERNICE	Female	1	2	3	2	2
1062	OWUSU ALEX	Male	2	3	5	4	4
1063	OWUSU-APENTENG STEPHEN	Male	2	3	5	4	4
1064	PARRY JESSICA	Male	2	3	5	4	4
1065	ADOM JENNIFER ESTHER OHENEBA	Female	1	2	3	2	2
1066	QUAICOE ENOCH	Male	2	3	5	4	4
1067	QUANSAH BELINDA	Female	1	2	3	2	2
1068	QUARTEY EVELYN NAA KWARLEY	Female	1	2	3	2	2
1069	ADOM KWADWO BOAKYE	Male	2	3	5	4	4
1070	QUARTEY SALOMEY	Female	1	2	3	2	2
1071	SAHEED AZEEZAT	Female	1	2	3	2	2
1072	SHAIBU FAUZIYATU	Female	1	2	3	2	2
1073	ADU BONA SUSANNA	Female	1	2	3	2	2
1074	SOWAH ALEXANDRA ENYONAM	Female	1	2	3	2	2
1075	SULLEY HINDU MUNIRU	Female	1	2	3	2	2
1076	TAGOE DAVID	Male	2	3	5	4	4
1077	ADU DORA	Female	1	2	3	2	2
1078	TAWIAH ADAMA OKOE	Male	2	3	5	4	4
1079	TETTEH KELVIN	Male	2	3	5	4	4
1080	TETTEH MALVIN	Male	2	3	5	4	4
1081	ADU PRISCILLA NKETIA	Female	1	2	3	2	2
1082	WADIE LINDA NKANSAH	Female	1	2	3	2	2
1083	WENOMA LINDA	Female	1	2	3	2	2
1084	YARTEY SEFIATU	Female	1	2	3	2	2
1085	ADU-AGYEI AWURA AKUA	Female	1	2	3	2	2
1086	OWUSU ALEX	Male	2	3	5	4	4
1087	OWUSU-APENTENG STEPHEN	Male	2	3	5	4	4
1088	PARRY JESSICA	Male	2	3	5	4	4
1089	ADU-TWUM FREDERICK ASANTE	Male	2	3	5	4	4
1090	QUAICOE ENOCH	Male	2	3	5	4	4
1091	QUANSAH BELINDA	Female	1	2	3	2	2
1092	QUARTEY EVELYN NAA KWARLEY	Female	1	2	3	2	2
1093	ADUSEI GIFTY YEBOAH	Female	1	2	3	2	2
1094	QUARTEY SALOMEY	Female	1	2	3	2	2
1095	SAHEED AZEEZAT	Female	1	2	3	2	2
1096	SHAIBU FAUZIYATU	Female	1	2	3	2	2
1097	ADUUM REBECCA	Female	1	2	3	2	2
1098	AFARI STEPHEN	Male	2	3	5	4	4
1099	AFOTEY PATRICK DUNYO	Male	2	3	5	4	4
1100	AFRAH TRACY NTOW	Female	1	2	3	2	2
1101	ABABIO ABEDNEGO A.	Male	2	3	5	4	4
1102	ABOAGYE ELIZABETH BOADIWAA	Female	1	2	3	2	2
1103	ABOE ANDREWS	Male	2	3	5	4	4
1104	ABRAHAM-QUANSAH MARY EVA	Female	1	2	3	2	2
1105	ABALEM JENNIFER	Female	1	2	3	2	2
1106	ADDAE SANDRA	Female	1	2	3	2	2
1107	ADJEI FREDERICK YAW	Male	2	3	5	4	4
1108	ADJEI PRINCE BAFFOUR	Male	2	3	5	4	4
1109	ABBAN VIDA OWUSU	Female	1	2	3	2	2
1110	ADJEI SAMUEL	Male	2	3	5	4	4
1111	ADJORLOLO MERCY NORKPLIM	Female	1	2	3	2	2
1112	ADOCTOR VICTORIA	Female	1	2	3	2	2
1113	ADU AFRIYIE	Male	2	3	5	4	4
1114	ADU EMMANUEL	Male	2	3	5	4	4
1115	ADZOWU MILLICENT	Female	1	2	3	2	2
1116	AFORDE JAMES ABLORDE	Male	2	3	5	4	4
1117	ABDALLAH FATIMATU	Female	1	2	3	2	2
1118	AGBENYEGA STEPHEN	Male	2	3	5	4	4
1119	AGBOGBA LANDRY KWAME	Male	2	3	5	4	4
1120	AGGERH BARNABAS KOBBY	Male	2	3	5	4	4
1121	ABDULAI FAIZA	Female	1	2	3	2	2
1122	AGOE JEHOSHAPHAT SOWAH	Male	2	3	5	4	4
1123	AGUDA NARKIE PATRICIA	Female	1	2	3	2	2
1124	AGYARE PRISCILLA DARFOUR	Female	1	2	3	2	2
1125	ABEKAH EMMANUEL	Male	2	3	5	4	4
1126	AGYEI RICHARD KWAME	Male	2	3	5	4	4
1127	AGYEMAN DUAH BOATEMAA	Female	1	2	3	2	2
1128	AGYEMAN PAUL BOAKYE	Male	2	3	5	4	4
1129	ABOAGYE DAVID ADU	Male	2	3	5	4	4
1130	AGYIRI GEORGINA	Female	1	2	3	2	2
1131	AHIABLEY PORTIA	Female	1	2	3	2	2
1132	AHONI MAUDLIN AYONGO	Female	1	2	3	2	2
1133	ABOAGYE FELIX	Male	2	3	5	4	4
1134	AKAGBO REBECCA	Female	1	2	3	2	2
1135	AKOTO REINDOLF APPIAH	Male	2	3	5	4	4
1136	AKUFFO GIDEON	Male	2	3	5	4	4
1137	ABU ABDUL MANAF	Male	2	3	5	4	4
1138	ALAGBO EMMANUEL	Male	2	3	5	4	4
1139	ALLOTEY KPAKPO VINCENT	Male	2	3	5	4	4
1140	ALLOTEY PEARL NAA AKU	Female	1	2	3	2	2
1141	ABUBAKAR ARAFAT SUFYAN	Male	2	3	5	4	4
1142	AMAKYE JAMES SARPONG	Male	2	3	5	4	4
1143	AMEVOR ERIC	Male	2	3	5	4	4
1144	AMOAH CHARLOTTE KORKOR	Female	1	2	3	2	2
1145	ACHEAMPONG CHRISTABEL	Female	1	2	3	2	2
1146	AMOAH MILDRED	Female	1	2	3	2	2
1147	AMOAKO ERNESTINA OPOKUA	Female	1	2	3	2	2
1148	AMPONSAH CECILIA ABENA	Female	1	2	3	2	2
1149	ACHEAMPONG KINGSLEY	Male	2	3	5	4	4
1150	AMUZU STELLA KABUKI	Female	1	2	3	2	2
1151	ANABI MUSAH AHMED	Male	2	3	5	4	4
1152	ANDERSON GIFTY	Female	1	2	3	2	2
1153	ACHEAMPONG MICHAEL APPIAH	Male	2	3	5	4	4
1154	ANDERSON VIVIAN	Female	1	2	3	2	2
1155	ANKOMAH GEORGINA	Female	1	2	3	2	2
1156	ANNANG FRANCISCA TORSHIE	Female	1	2	3	2	2
1157	ACQUAH BENJAMIN	Male	2	3	5	4	4
1158	ANNOR RICHAEL	Female	1	2	3	2	2
1159	ANSAH FAUSTINA	Female	1	2	3	2	2
1160	ANSAH MARFO DOREEN	Female	1	2	3	2	2
1161	ACQUAH KINGSLEY OCANSEY	Male	2	3	5	4	4
1162	ANTHONIO HENRIETTA	Female	1	2	3	2	2
1163	APPIAH ISAAC	Male	2	3	5	4	4
1164	APPIAH MOSES	Male	2	3	5	4	4
1165	ACQUAH PHILIP	Male	2	3	5	4	4
1166	APPIAH PRINCE KWESI	Male	2	3	5	4	4
1167	ARKO HAGAR	Female	1	2	3	2	2
1168	ARKOH GALAHAD AHINSAH	Female	1	2	3	2	2
1169	ADAM HALIMATU SADIA	Female	1	2	3	2	2
1170	ARTHUR EBENEZER	Male	2	3	5	4	4
1171	ARTHUR ESSUMAN JAMES	Male	2	3	5	4	4
1172	ARYEETEY MESHACK	Male	2	3	5	4	4
1173	ADAMA-TETTEY MARYNSKY	Female	1	2	3	2	2
1174	ASABIRE SOPHIA	Female	1	2	3	2	2
1175	ASAHENE EMMANUELLA	Female	1	2	3	2	2
1176	ASAMANY CARL	Male	2	3	5	4	4
1177	ADAMS AFISHETU	Female	1	2	3	2	2
1178	ASAMOAH MERCY	Female	1	2	3	2	2
1179	ASARE ERIC AGYIRI AWERE	Male	2	3	5	4	4
1180	ASHITEY MCZILL HAFIZ OKO	Male	2	3	5	4	4
1181	ADAMS ANASS	Male	2	3	5	4	4
1182	ASIEDU MAVIS	Female	1	2	3	2	2
1183	ATIEMO JOSEPHINE	Female	1	2	3	2	2
1184	AWUDER WILLIAM YAO	Male	2	3	5	4	4
1185	ADARKWAH IRENE	Female	1	2	3	2	2
1186	AYER PERCY OKAI	Male	2	3	5	4	4
1187	AYISI BENJAMIN	Male	2	3	5	4	4
1188	AZAMETSI MIRABLE	Female	1	2	3	2	2
1189	ADDAE PORTIA	Female	1	2	3	2	2
1190	BEDIAKO PRISCILLA ODURO	Female	1	2	3	2	2
1191	BELLEY BETTY	Female	1	2	3	2	2
1192	BOATEMAA SLYVIA	Female	1	2	3	2	2
1193	ADDEY AUGUSTINE	Male	2	3	5	4	4
1194	BOATENG ABRAHAM AMEGAVIE	Male	2	3	5	4	4
1195	BONDZIE SAMUEL AIDOO	Male	2	3	5	4	4
1196	BONI MAXWELL EDEM	Male	2	3	5	4	4
1197	ADDICO FRANCIS AWULEY	Male	2	3	5	4	4
1198	BOTCHWAY HANNAH	Female	1	2	3	2	2
1199	BOTCHWAY JEMIMA ATSWEI	Female	1	2	3	2	2
1200	BOTCHWAY MICHAEL	Male	2	3	5	4	4
1201	ADDISON EMMANUEL	Male	2	3	5	4	4
1202	BOYETEY SOLOMON BUERNOR	Male	2	3	5	4	4
1203	BRENYAH SYLVESTER	Male	2	3	5	4	4
1204	CLELAND VERA VASTU	Female	1	2	3	2	2
1205	ADDISON STEPHEN EBO	Male	2	3	5	4	4
1206	DADZIE ISAAC	Male	2	3	5	4	4
1207	DAMALIE DEBORAH YAYRA	Female	1	2	3	2	2
1208	DARKO MOSES	Male	2	3	5	4	4
1209	ADDO NAOMI	Female	1	2	3	2	2
1210	DARKOA DORA	Female	1	2	3	2	2
1211	DENTAAH AMPOFO PATIENCE O.	Female	1	2	3	2	2
1212	DJIDONU DANIEL KWESI	Male	2	3	5	4	4
1213	ADDO PATIENCE	Female	1	2	3	2	2
1214	DOE KENNEDY	Male	2	3	5	4	4
1215	DOKU ESTHER MAKU	Female	1	2	3	2	2
1216	DOWUONA PRISCILLA NORKAI	Female	1	2	3	2	2
1217	ADDY MELIORA GENEVIEVE	Female	1	2	3	2	2
1218	DZRAMADO SANDRA	Female	1	2	3	2	2
1219	DZUFLE BRIDGET	Female	1	2	3	2	2
1220	EDZEOU BERNARD	Male	2	3	5	4	4
1221	ADEKPUITOR PETER	Male	2	3	5	4	4
1222	ENTSIEH EVANS	Male	2	3	5	4	4
1223	FOMETU GLADYS COURINE	Female	1	2	3	2	2
1224	GANYO REBECCA EYRAM	Female	1	2	3	2	2
1225	ADEKU CALEB KOJO	Male	2	3	5	4	4
1226	GBADGO CHARLOTTE	Female	1	2	3	2	2
1227	GODOMEY ABRAHAM	Male	2	3	5	4	4
1228	GYAN FELICIA	Female	1	2	3	2	2
1229	ADETI CLIFFORD KWABLA	Male	2	3	5	4	4
1230	GYAN MANTEY	Male	2	3	5	4	4
1231	GYEKYE EMMANUEL	Male	2	3	5	4	4
1232	HAGAN EDWIN EBOH	Male	2	3	5	4	4
1233	ADINKRAH ABIGAIL	Female	1	2	3	2	2
1234	HAMMOND NATHANIEL	Male	2	3	5	4	4
1235	IBRAHIM MOHAMMED SANUSI	Male	2	3	5	4	4
1236	IBRAHIM SEMIRATU	Female	1	2	3	2	2
1237	ADIOK JOSHUA ALLEN	Male	2	3	5	4	4
1238	INUSAH MOHAMMED	Male	2	3	5	4	4
1239	KABAH ALIAYIRE ALEX	Male	2	3	5	4	4
1240	KELVIN NKANSAH	Male	2	3	5	4	4
1241	ADJAKLOE FLOSSIE DZIFA	Female	1	2	3	2	2
1242	KUDJUH BRIGHT DOSU	Male	2	3	5	4	4
1243	KUMI DANIEL DARKO	Male	2	3	5	4	4
1244	KUMI MARY POKUAA	Female	1	2	3	2	2
1245	ADJASOO LINDA SELINAM	Female	1	2	3	2	2
1246	KUSI LYDIA ADJOA ADJEIWAA	Female	1	2	3	2	2
1247	KWARTENG JESSE SARPONG	Male	2	3	5	4	4
1248	LANTEI- LAMPTEY JESSE NII	Male	2	3	5	4	4
1249	ADJEI - BAAH STEPHEN	Male	2	3	5	4	4
1250	MASOPEH FELICIA VANILLA NAA AMELEY	Female	1	2	3	2	2
1251	MENDS FIDELIA APPIAH	Female	1	2	3	2	2
1252	MENSAH BETTY TELUS	Female	1	2	3	2	2
1253	ADJEI BELINDA ADJETEY	Female	1	2	3	2	2
1254	MENSAH CHARLES GYAMFI	Male	2	3	5	4	4
1255	MENSAH PHILOMINA TECHIE	Female	1	2	3	2	2
1256	MENYE GODWIN JR	Male	2	3	5	4	4
1257	ADJEI DANIEL	Male	2	3	5	4	4
1258	MOHAMMED ADAM ZAKIYU	Male	2	3	5	4	4
1259	NARTEH GEOFFREY	Male	2	3	5	4	4
1260	NKANSAH LOCTUS ADJEI	Female	1	2	3	2	2
1261	ADJEI HENRY	Male	2	3	5	4	4
1262	NORTEY NICHOLAS	Male	2	3	5	4	4
1263	NUAMAH SAMUEL	Male	2	3	5	4	4
1264	NUKPE DAVID CONVERY	Male	2	3	5	4	4
1265	ADJEI JENNIFER ODUA	Female	1	2	3	2	2
1266	NYARKO ANISA	Female	1	2	3	2	2
1267	NYARKO NICHOLAS	Male	2	3	5	4	4
1268	NYARKO WILLIAM KWABENA	Male	2	3	5	4	4
1269	ADJEIBEA RACHEAL	Female	1	2	3	2	2
1270	NYEDU ISHMAEL	Male	2	3	5	4	4
1271	OBENG JULIANA	Female	1	2	3	2	2
1272	OBUOBI SOLOMON	Male	2	3	5	4	4
1273	ADJETEY ERAMI NII ADJEI	Male	2	3	5	4	4
1274	ODOI ERIC AKO	Male	2	3	5	4	4
1275	OFFEI OSEI FRANCIS	Male	2	3	5	4	4
1276	OPOKU SAMUEL	Male	2	3	5	4	4
1277	ADJIN-TETTEY JEREMIAH	Male	2	3	5	4	4
1278	OPOKUA GIFTY NANA AMA	Female	1	2	3	2	2
1279	OSEI RICHMOND KOFI	Male	2	3	5	4	4
1280	OUEDORAOGO ROGER PETER	Male	2	3	5	4	4
1281	ADJOKATSE BERNICE	Female	1	2	3	2	2
1282	OWUSU ALEX	Male	2	3	5	4	4
1283	OWUSU-APENTENG STEPHEN	Male	2	3	5	4	4
1284	PARRY JESSICA	Male	2	3	5	4	4
1285	ADOM JENNIFER ESTHER OHENEBA	Female	1	2	3	2	2
1286	QUAICOE ENOCH	Male	2	3	5	4	4
1287	QUANSAH BELINDA	Female	1	2	3	2	2
1288	QUARTEY EVELYN NAA KWARLEY	Female	1	2	3	2	2
1289	ADOM KWADWO BOAKYE	Male	2	3	5	4	4
1290	QUARTEY SALOMEY	Female	1	2	3	2	2
1291	SAHEED AZEEZAT	Female	1	2	3	2	2
1292	SHAIBU FAUZIYATU	Female	1	2	3	2	2
1293	ADU BONA SUSANNA	Female	1	2	3	2	2
1294	SOWAH ALEXANDRA ENYONAM	Female	1	2	3	2	2
1295	SULLEY HINDU MUNIRU	Female	1	2	3	2	2
1296	TAGOE DAVID	Male	2	3	5	4	4
1297	ADU DORA	Female	1	2	3	2	2
1298	TAWIAH ADAMA OKOE	Male	2	3	5	4	4
1299	TETTEH KELVIN	Male	2	3	5	4	4
1300	TETTEH MALVIN	Male	2	3	5	4	4
1301	ADU PRISCILLA NKETIA	Female	1	2	3	2	2
1302	WADIE LINDA NKANSAH	Female	1	2	3	2	2
1303	WENOMA LINDA	Female	1	2	3	2	2
1304	YARTEY SEFIATU	Female	1	2	3	2	2
1305	ADU-AGYEI AWURA AKUA	Female	1	2	3	2	2
1306	OWUSU ALEX	Male	2	3	5	4	4
1307	OWUSU-APENTENG STEPHEN	Male	2	3	5	4	4
1308	PARRY JESSICA	Male	2	3	5	4	4
1309	ADU-TWUM FREDERICK ASANTE	Male	2	3	5	4	4
1310	QUAICOE ENOCH	Male	2	3	5	4	4
1311	QUANSAH BELINDA	Female	1	2	3	2	2
1312	QUARTEY EVELYN NAA KWARLEY	Female	1	2	3	2	2
1313	ADUSEI GIFTY YEBOAH	Female	1	2	3	2	2
1314	QUARTEY SALOMEY	Female	1	2	3	2	2
1315	SAHEED AZEEZAT	Female	1	2	3	2	2
1316	SHAIBU FAUZIYATU	Female	1	2	3	2	2
1317	ADUUM REBECCA	Female	1	2	3	2	2
1318	AFARI STEPHEN	Male	2	3	5	4	4
1319	AFOTEY PATRICK DUNYO	Male	2	3	5	4	4
1320	AFRAH TRACY NTOW	Female	1	2	3	2	2
1321	ABABIO ABEDNEGO A.	Male	2	3	5	4	4
1322	ABOAGYE ELIZABETH BOADIWAA	Female	1	2	3	2	2
1323	ABOE ANDREWS	Male	2	3	5	4	4
1324	ABRAHAM-QUANSAH MARY EVA	Female	1	2	3	2	2
1325	ABALEM JENNIFER	Female	1	2	3	2	2
1326	ADDAE SANDRA	Female	1	2	3	2	2
1327	ADJEI FREDERICK YAW	Male	2	3	5	4	4
1328	ADJEI PRINCE BAFFOUR	Male	2	3	5	4	4
1329	ABBAN VIDA OWUSU	Female	1	2	3	2	2
1330	ADJEI SAMUEL	Male	2	3	5	4	4
1331	ADJORLOLO MERCY NORKPLIM	Female	1	2	3	2	2
1332	ADOCTOR VICTORIA	Female	1	2	3	2	2
1333	ADU AFRIYIE	Male	2	3	5	4	4
1334	ADU EMMANUEL	Male	2	3	5	4	4
1335	ADZOWU MILLICENT	Female	1	2	3	2	2
1336	AFORDE JAMES ABLORDE	Male	2	3	5	4	4
1337	ABDALLAH FATIMATU	Female	1	2	3	2	2
1338	AGBENYEGA STEPHEN	Male	2	3	5	4	4
1339	AGBOGBA LANDRY KWAME	Male	2	3	5	4	4
1340	AGGERH BARNABAS KOBBY	Male	2	3	5	4	4
1341	ABDULAI FAIZA	Female	1	2	3	2	2
1342	AGOE JEHOSHAPHAT SOWAH	Male	2	3	5	4	4
1343	AGUDA NARKIE PATRICIA	Female	1	2	3	2	2
1344	AGYARE PRISCILLA DARFOUR	Female	1	2	3	2	2
1345	ABEKAH EMMANUEL	Male	2	3	5	4	4
1346	AGYEI RICHARD KWAME	Male	2	3	5	4	4
1347	AGYEMAN DUAH BOATEMAA	Female	1	2	3	2	2
1348	AGYEMAN PAUL BOAKYE	Male	2	3	5	4	4
1349	ABOAGYE DAVID ADU	Male	2	3	5	4	4
1350	AGYIRI GEORGINA	Female	1	2	3	2	2
1351	AHIABLEY PORTIA	Female	1	2	3	2	2
1352	AHONI MAUDLIN AYONGO	Female	1	2	3	2	2
1353	ABOAGYE FELIX	Male	2	3	5	4	4
1354	AKAGBO REBECCA	Female	1	2	3	2	2
1355	AKOTO REINDOLF APPIAH	Male	2	3	5	4	4
1356	AKUFFO GIDEON	Male	2	3	5	4	4
1357	ABU ABDUL MANAF	Male	2	3	5	4	4
1358	ALAGBO EMMANUEL	Male	2	3	5	4	4
1359	ALLOTEY KPAKPO VINCENT	Male	2	3	5	4	4
1360	ALLOTEY PEARL NAA AKU	Female	1	2	3	2	2
1361	ABUBAKAR ARAFAT SUFYAN	Male	2	3	5	4	4
1362	AMAKYE JAMES SARPONG	Male	2	3	5	4	4
1363	AMEVOR ERIC	Male	2	3	5	4	4
1364	AMOAH CHARLOTTE KORKOR	Female	1	2	3	2	2
1365	ACHEAMPONG CHRISTABEL	Female	1	2	3	2	2
1366	AMOAH MILDRED	Female	1	2	3	2	2
1367	AMOAKO ERNESTINA OPOKUA	Female	1	2	3	2	2
1368	AMPONSAH CECILIA ABENA	Female	1	2	3	2	2
1369	ACHEAMPONG KINGSLEY	Male	2	3	5	4	4
1370	AMUZU STELLA KABUKI	Female	1	2	3	2	2
1371	ANABI MUSAH AHMED	Male	2	3	5	4	4
1372	ANDERSON GIFTY	Female	1	2	3	2	2
1373	ACHEAMPONG MICHAEL APPIAH	Male	2	3	5	4	4
1374	ANDERSON VIVIAN	Female	1	2	3	2	2
1375	ANKOMAH GEORGINA	Female	1	2	3	2	2
1376	ANNANG FRANCISCA TORSHIE	Female	1	2	3	2	2
1377	ACQUAH BENJAMIN	Male	2	3	5	4	4
1378	ANNOR RICHAEL	Female	1	2	3	2	2
1379	ANSAH FAUSTINA	Female	1	2	3	2	2
1380	ANSAH MARFO DOREEN	Female	1	2	3	2	2
1381	ACQUAH KINGSLEY OCANSEY	Male	2	3	5	4	4
1382	ANTHONIO HENRIETTA	Female	1	2	3	2	2
1383	APPIAH ISAAC	Male	2	3	5	4	4
1384	APPIAH MOSES	Male	2	3	5	4	4
1385	ACQUAH PHILIP	Male	2	3	5	4	4
1386	APPIAH PRINCE KWESI	Male	2	3	5	4	4
1387	ARKO HAGAR	Female	1	2	3	2	2
1388	ARKOH GALAHAD AHINSAH	Female	1	2	3	2	2
1389	ADAM HALIMATU SADIA	Female	1	2	3	2	2
1390	ARTHUR EBENEZER	Male	2	3	5	4	4
1391	ARTHUR ESSUMAN JAMES	Male	2	3	5	4	4
1392	ARYEETEY MESHACK	Male	2	3	5	4	4
1393	ADAMA-TETTEY MARYNSKY	Female	1	2	3	2	2
1394	ASABIRE SOPHIA	Female	1	2	3	2	2
1395	ASAHENE EMMANUELLA	Female	1	2	3	2	2
1396	ASAMANY CARL	Male	2	3	5	4	4
1397	ADAMS AFISHETU	Female	1	2	3	2	2
1398	ASAMOAH MERCY	Female	1	2	3	2	2
1399	ASARE ERIC AGYIRI AWERE	Male	2	3	5	4	4
1400	ASHITEY MCZILL HAFIZ OKO	Male	2	3	5	4	4
1401	ADAMS ANASS	Male	2	3	5	4	4
1402	ASIEDU MAVIS	Female	1	2	3	2	2
1403	ATIEMO JOSEPHINE	Female	1	2	3	2	2
1404	AWUDER WILLIAM YAO	Male	2	3	5	4	4
1405	ADARKWAH IRENE	Female	1	2	3	2	2
1406	AYER PERCY OKAI	Male	2	3	5	4	4
1407	AYISI BENJAMIN	Male	2	3	5	4	4
1408	AZAMETSI MIRABLE	Female	1	2	3	2	2
1409	ADDAE PORTIA	Female	1	2	3	2	2
1410	BEDIAKO PRISCILLA ODURO	Female	1	2	3	2	2
1411	BELLEY BETTY	Female	1	2	3	2	2
1412	BOATEMAA SLYVIA	Female	1	2	3	2	2
1413	ADDEY AUGUSTINE	Male	2	3	5	4	4
1414	BOATENG ABRAHAM AMEGAVIE	Male	2	3	5	4	4
1415	BONDZIE SAMUEL AIDOO	Male	2	3	5	4	4
1416	BONI MAXWELL EDEM	Male	2	3	5	4	4
1417	ADDICO FRANCIS AWULEY	Male	2	3	5	4	4
1418	BOTCHWAY HANNAH	Female	1	2	3	2	2
1419	BOTCHWAY JEMIMA ATSWEI	Female	1	2	3	2	2
1420	BOTCHWAY MICHAEL	Male	2	3	5	4	4
1421	ADDISON EMMANUEL	Male	2	3	5	4	4
1422	BOYETEY SOLOMON BUERNOR	Male	2	3	5	4	4
1423	BRENYAH SYLVESTER	Male	2	3	5	4	4
1424	CLELAND VERA VASTU	Female	1	2	3	2	2
1425	ADDISON STEPHEN EBO	Male	2	3	5	4	4
1426	DADZIE ISAAC	Male	2	3	5	4	4
1427	DAMALIE DEBORAH YAYRA	Female	1	2	3	2	2
1428	DARKO MOSES	Male	2	3	5	4	4
1429	ADDO NAOMI	Female	1	2	3	2	2
1430	DARKOA DORA	Female	1	2	3	2	2
1431	DENTAAH AMPOFO PATIENCE O.	Female	1	2	3	2	2
1432	DJIDONU DANIEL KWESI	Male	2	3	5	4	4
1433	ADDO PATIENCE	Female	1	2	3	2	2
1434	DOE KENNEDY	Male	2	3	5	4	4
1435	DOKU ESTHER MAKU	Female	1	2	3	2	2
1436	DOWUONA PRISCILLA NORKAI	Female	1	2	3	2	2
1437	ADDY MELIORA GENEVIEVE	Female	1	2	3	2	2
1438	DZRAMADO SANDRA	Female	1	2	3	2	2
1439	DZUFLE BRIDGET	Female	1	2	3	2	2
1440	EDZEOU BERNARD	Male	2	3	5	4	4
1441	ADEKPUITOR PETER	Male	2	3	5	4	4
1442	ENTSIEH EVANS	Male	2	3	5	4	4
1443	FOMETU GLADYS COURINE	Female	1	2	3	2	2
1444	GANYO REBECCA EYRAM	Female	1	2	3	2	2
1445	ADEKU CALEB KOJO	Male	2	3	5	4	4
1446	GBADGO CHARLOTTE	Female	1	2	3	2	2
1447	GODOMEY ABRAHAM	Male	2	3	5	4	4
1448	GYAN FELICIA	Female	1	2	3	2	2
1449	ADETI CLIFFORD KWABLA	Male	2	3	5	4	4
1450	GYAN MANTEY	Male	2	3	5	4	4
1451	GYEKYE EMMANUEL	Male	2	3	5	4	4
1452	HAGAN EDWIN EBOH	Male	2	3	5	4	4
1453	ADINKRAH ABIGAIL	Female	1	2	3	2	2
1454	HAMMOND NATHANIEL	Male	2	3	5	4	4
1455	IBRAHIM MOHAMMED SANUSI	Male	2	3	5	4	4
1456	IBRAHIM SEMIRATU	Female	1	2	3	2	2
1457	ADIOK JOSHUA ALLEN	Male	2	3	5	4	4
1458	INUSAH MOHAMMED	Male	2	3	5	4	4
1459	KABAH ALIAYIRE ALEX	Male	2	3	5	4	4
1460	KELVIN NKANSAH	Male	2	3	5	4	4
1461	ADJAKLOE FLOSSIE DZIFA	Female	1	2	3	2	2
1462	KUDJUH BRIGHT DOSU	Male	2	3	5	4	4
1463	KUMI DANIEL DARKO	Male	2	3	5	4	4
1464	KUMI MARY POKUAA	Female	1	2	3	2	2
1465	ADJASOO LINDA SELINAM	Female	1	2	3	2	2
1466	KUSI LYDIA ADJOA ADJEIWAA	Female	1	2	3	2	2
1467	KWARTENG JESSE SARPONG	Male	2	3	5	4	4
1468	LANTEI- LAMPTEY JESSE NII	Male	2	3	5	4	4
1469	ADJEI - BAAH STEPHEN	Male	2	3	5	4	4
1470	MASOPEH FELICIA VANILLA NAA AMELEY	Female	1	2	3	2	2
1471	MENDS FIDELIA APPIAH	Female	1	2	3	2	2
1472	MENSAH BETTY TELUS	Female	1	2	3	2	2
1473	ADJEI BELINDA ADJETEY	Female	1	2	3	2	2
1474	MENSAH CHARLES GYAMFI	Male	2	3	5	4	4
1475	MENSAH PHILOMINA TECHIE	Female	1	2	3	2	2
1476	MENYE GODWIN JR	Male	2	3	5	4	4
1477	ADJEI DANIEL	Male	2	3	5	4	4
1478	MOHAMMED ADAM ZAKIYU	Male	2	3	5	4	4
1479	NARTEH GEOFFREY	Male	2	3	5	4	4
1480	NKANSAH LOCTUS ADJEI	Female	1	2	3	2	2
1481	ADJEI HENRY	Male	2	3	5	4	4
1482	NORTEY NICHOLAS	Male	2	3	5	4	4
1483	NUAMAH SAMUEL	Male	2	3	5	4	4
1484	NUKPE DAVID CONVERY	Male	2	3	5	4	4
1485	ADJEI JENNIFER ODUA	Female	1	2	3	2	2
1486	NYARKO ANISA	Female	1	2	3	2	2
1487	NYARKO NICHOLAS	Male	2	3	5	4	4
1488	NYARKO WILLIAM KWABENA	Male	2	3	5	4	4
1489	ADJEIBEA RACHEAL	Female	1	2	3	2	2
1490	NYEDU ISHMAEL	Male	2	3	5	4	4
1491	OBENG JULIANA	Female	1	2	3	2	2
1492	OBUOBI SOLOMON	Male	2	3	5	4	4
1493	ADJETEY ERAMI NII ADJEI	Male	2	3	5	4	4
1494	ODOI ERIC AKO	Male	2	3	5	4	4
1495	OFFEI OSEI FRANCIS	Male	2	3	5	4	4
1496	OPOKU SAMUEL	Male	2	3	5	4	4
1497	ADJIN-TETTEY JEREMIAH	Male	2	3	5	4	4
1498	OPOKUA GIFTY NANA AMA	Female	1	2	3	2	2
1499	OSEI RICHMOND KOFI	Male	2	3	5	4	4
1500	OUEDORAOGO ROGER PETER	Male	2	3	5	4	4
1501	ADJOKATSE BERNICE	Female	1	2	3	2	2
1502	OWUSU ALEX	Male	2	3	5	4	4
1503	OWUSU-APENTENG STEPHEN	Male	2	3	5	4	4
1504	PARRY JESSICA	Male	2	3	5	4	4
1505	ADOM JENNIFER ESTHER OHENEBA	Female	1	2	3	2	2
1506	QUAICOE ENOCH	Male	2	3	5	4	4
1507	QUANSAH BELINDA	Female	1	2	3	2	2
1508	QUARTEY EVELYN NAA KWARLEY	Female	1	2	3	2	2
1509	ADOM KWADWO BOAKYE	Male	2	3	5	4	4
1510	QUARTEY SALOMEY	Female	1	2	3	2	2
1511	SAHEED AZEEZAT	Female	1	2	3	2	2
1512	SHAIBU FAUZIYATU	Female	1	2	3	2	2
1513	ADU BONA SUSANNA	Female	1	2	3	2	2
1514	SOWAH ALEXANDRA ENYONAM	Female	1	2	3	2	2
1515	SULLEY HINDU MUNIRU	Female	1	2	3	2	2
1516	TAGOE DAVID	Male	2	3	5	4	4
1517	ADU DORA	Female	1	2	3	2	2
1518	TAWIAH ADAMA OKOE	Male	2	3	5	4	4
1519	TETTEH KELVIN	Male	2	3	5	4	4
1520	TETTEH MALVIN	Male	2	3	5	4	4
1521	ADU PRISCILLA NKETIA	Female	1	2	3	2	2
1522	WADIE LINDA NKANSAH	Female	1	2	3	2	2
1523	WENOMA LINDA	Female	1	2	3	2	2
1524	YARTEY SEFIATU	Female	1	2	3	2	2
1525	ADU-AGYEI AWURA AKUA	Female	1	2	3	2	2
1526	OWUSU ALEX	Male	2	3	5	4	4
1527	OWUSU-APENTENG STEPHEN	Male	2	3	5	4	4
1528	PARRY JESSICA	Male	2	3	5	4	4
1529	ADU-TWUM FREDERICK ASANTE	Male	2	3	5	4	4
1530	QUAICOE ENOCH	Male	2	3	5	4	4
1531	QUANSAH BELINDA	Female	1	2	3	2	2
1532	QUARTEY EVELYN NAA KWARLEY	Female	1	2	3	2	2
1533	ADUSEI GIFTY YEBOAH	Female	1	2	3	2	2
1534	QUARTEY SALOMEY	Female	1	2	3	2	2
1535	SAHEED AZEEZAT	Female	1	2	3	2	2
1536	SHAIBU FAUZIYATU	Female	1	2	3	2	2
1537	ADUUM REBECCA	Female	1	2	3	2	2
1538	AFARI STEPHEN	Male	2	3	5	4	4
1539	AFOTEY PATRICK DUNYO	Male	2	3	5	4	4
1540	AFRAH TRACY NTOW	Female	1	2	3	2	2
1541	ABABIO ABEDNEGO A.	Male	2	3	5	4	4
1542	ABOAGYE ELIZABETH BOADIWAA	Female	1	2	3	2	2
1543	ABOE ANDREWS	Male	2	3	5	4	4
1544	ABRAHAM-QUANSAH MARY EVA	Female	1	2	3	2	2
1545	ABALEM JENNIFER	Female	1	2	3	2	2
1546	ADDAE SANDRA	Female	1	2	3	2	2
1547	ADJEI FREDERICK YAW	Male	2	3	5	4	4
1548	ADJEI PRINCE BAFFOUR	Male	2	3	5	4	4
1549	ABBAN VIDA OWUSU	Female	1	2	3	2	2
1550	ADJEI SAMUEL	Male	2	3	5	4	4
1551	ADJORLOLO MERCY NORKPLIM	Female	1	2	3	2	2
1552	ADOCTOR VICTORIA	Female	1	2	3	2	2
1553	ADU AFRIYIE	Male	2	3	5	4	4
1554	ADU EMMANUEL	Male	2	3	5	4	4
1555	ADZOWU MILLICENT	Female	1	2	3	2	2
1556	AFORDE JAMES ABLORDE	Male	2	3	5	4	4
1557	ABDALLAH FATIMATU	Female	1	2	3	2	2
1558	AGBENYEGA STEPHEN	Male	2	3	5	4	4
1559	AGBOGBA LANDRY KWAME	Male	2	3	5	4	4
1560	AGGERH BARNABAS KOBBY	Male	2	3	5	4	4
1561	ABDULAI FAIZA	Female	1	2	3	2	2
1562	AGOE JEHOSHAPHAT SOWAH	Male	2	3	5	4	4
1563	AGUDA NARKIE PATRICIA	Female	1	2	3	2	2
1564	AGYARE PRISCILLA DARFOUR	Female	1	2	3	2	2
1565	ABEKAH EMMANUEL	Male	2	3	5	4	4
1566	AGYEI RICHARD KWAME	Male	2	3	5	4	4
1567	AGYEMAN DUAH BOATEMAA	Female	1	2	3	2	2
1568	AGYEMAN PAUL BOAKYE	Male	2	3	5	4	4
1569	ABOAGYE DAVID ADU	Male	2	3	5	4	4
1570	AGYIRI GEORGINA	Female	1	2	3	2	2
1571	AHIABLEY PORTIA	Female	1	2	3	2	2
1572	AHONI MAUDLIN AYONGO	Female	1	2	3	2	2
1573	ABOAGYE FELIX	Male	2	3	5	4	4
1574	AKAGBO REBECCA	Female	1	2	3	2	2
1575	AKOTO REINDOLF APPIAH	Male	2	3	5	4	4
1576	AKUFFO GIDEON	Male	2	3	5	4	4
1577	ABU ABDUL MANAF	Male	2	3	5	4	4
1578	ALAGBO EMMANUEL	Male	2	3	5	4	4
1579	ALLOTEY KPAKPO VINCENT	Male	2	3	5	4	4
1580	ALLOTEY PEARL NAA AKU	Female	1	2	3	2	2
1581	ABUBAKAR ARAFAT SUFYAN	Male	2	3	5	4	4
1582	AMAKYE JAMES SARPONG	Male	2	3	5	4	4
1583	AMEVOR ERIC	Male	2	3	5	4	4
1584	AMOAH CHARLOTTE KORKOR	Female	1	2	3	2	2
1585	ACHEAMPONG CHRISTABEL	Female	1	2	3	2	2
1586	AMOAH MILDRED	Female	1	2	3	2	2
1587	AMOAKO ERNESTINA OPOKUA	Female	1	2	3	2	2
1588	AMPONSAH CECILIA ABENA	Female	1	2	3	2	2
1589	ACHEAMPONG KINGSLEY	Male	2	3	5	4	4
1590	AMUZU STELLA KABUKI	Female	1	2	3	2	2
1591	ANABI MUSAH AHMED	Male	2	3	5	4	4
1592	ANDERSON GIFTY	Female	1	2	3	2	2
1593	ACHEAMPONG MICHAEL APPIAH	Male	2	3	5	4	4
1594	ANDERSON VIVIAN	Female	1	2	3	2	2
1595	ANKOMAH GEORGINA	Female	1	2	3	2	2
1596	ANNANG FRANCISCA TORSHIE	Female	1	2	3	2	2
1597	ACQUAH BENJAMIN	Male	2	3	5	4	4
1598	ANNOR RICHAEL	Female	1	2	3	2	2
1599	ANSAH FAUSTINA	Female	1	2	3	2	2
1600	ANSAH MARFO DOREEN	Female	1	2	3	2	2
1601	ACQUAH KINGSLEY OCANSEY	Male	2	3	5	4	4
1602	ANTHONIO HENRIETTA	Female	1	2	3	2	2
1603	APPIAH ISAAC	Male	2	3	5	4	4
1604	APPIAH MOSES	Male	2	3	5	4	4
1605	ACQUAH PHILIP	Male	2	3	5	4	4
1606	APPIAH PRINCE KWESI	Male	2	3	5	4	4
1607	ARKO HAGAR	Female	1	2	3	2	2
1608	ARKOH GALAHAD AHINSAH	Female	1	2	3	2	2
1609	ADAM HALIMATU SADIA	Female	1	2	3	2	2
1610	ARTHUR EBENEZER	Male	2	3	5	4	4
1611	ARTHUR ESSUMAN JAMES	Male	2	3	5	4	4
1612	ARYEETEY MESHACK	Male	2	3	5	4	4
1613	ADAMA-TETTEY MARYNSKY	Female	1	2	3	2	2
1614	ASABIRE SOPHIA	Female	1	2	3	2	2
1615	ASAHENE EMMANUELLA	Female	1	2	3	2	2
1616	ASAMANY CARL	Male	2	3	5	4	4
1617	ADAMS AFISHETU	Female	1	2	3	2	2
1618	ASAMOAH MERCY	Female	1	2	3	2	2
1619	ASARE ERIC AGYIRI AWERE	Male	2	3	5	4	4
1620	ASHITEY MCZILL HAFIZ OKO	Male	2	3	5	4	4
1621	ADAMS ANASS	Male	2	3	5	4	4
1622	ASIEDU MAVIS	Female	1	2	3	2	2
1623	ATIEMO JOSEPHINE	Female	1	2	3	2	2
1624	AWUDER WILLIAM YAO	Male	2	3	5	4	4
1625	ADARKWAH IRENE	Female	1	2	3	2	2
1626	AYER PERCY OKAI	Male	2	3	5	4	4
1627	AYISI BENJAMIN	Male	2	3	5	4	4
1628	AZAMETSI MIRABLE	Female	1	2	3	2	2
1629	ADDAE PORTIA	Female	1	2	3	2	2
1630	BEDIAKO PRISCILLA ODURO	Female	1	2	3	2	2
1631	BELLEY BETTY	Female	1	2	3	2	2
1632	BOATEMAA SLYVIA	Female	1	2	3	2	2
1633	ADDEY AUGUSTINE	Male	2	3	5	4	4
1634	BOATENG ABRAHAM AMEGAVIE	Male	2	3	5	4	4
1635	BONDZIE SAMUEL AIDOO	Male	2	3	5	4	4
1636	BONI MAXWELL EDEM	Male	2	3	5	4	4
1637	ADDICO FRANCIS AWULEY	Male	2	3	5	4	4
1638	BOTCHWAY HANNAH	Female	1	2	3	2	2
1639	BOTCHWAY JEMIMA ATSWEI	Female	1	2	3	2	2
1640	BOTCHWAY MICHAEL	Male	2	3	5	4	4
1641	ADDISON EMMANUEL	Male	2	3	5	4	4
1642	BOYETEY SOLOMON BUERNOR	Male	2	3	5	4	4
1643	BRENYAH SYLVESTER	Male	2	3	5	4	4
1644	CLELAND VERA VASTU	Female	1	2	3	2	2
1645	ADDISON STEPHEN EBO	Male	2	3	5	4	4
1646	DADZIE ISAAC	Male	2	3	5	4	4
1647	DAMALIE DEBORAH YAYRA	Female	1	2	3	2	2
1648	DARKO MOSES	Male	2	3	5	4	4
1649	ADDO NAOMI	Female	1	2	3	2	2
1650	DARKOA DORA	Female	1	2	3	2	2
1651	DENTAAH AMPOFO PATIENCE O.	Female	1	2	3	2	2
1652	DJIDONU DANIEL KWESI	Male	2	3	5	4	4
1653	ADDO PATIENCE	Female	1	2	3	2	2
1654	DOE KENNEDY	Male	2	3	5	4	4
1655	DOKU ESTHER MAKU	Female	1	2	3	2	2
1656	DOWUONA PRISCILLA NORKAI	Female	1	2	3	2	2
1657	ADDY MELIORA GENEVIEVE	Female	1	2	3	2	2
1658	DZRAMADO SANDRA	Female	1	2	3	2	2
1659	DZUFLE BRIDGET	Female	1	2	3	2	2
1660	EDZEOU BERNARD	Male	2	3	5	4	4
1661	ADEKPUITOR PETER	Male	2	3	5	4	4
1662	ENTSIEH EVANS	Male	2	3	5	4	4
1663	FOMETU GLADYS COURINE	Female	1	2	3	2	2
1664	GANYO REBECCA EYRAM	Female	1	2	3	2	2
1665	ADEKU CALEB KOJO	Male	2	3	5	4	4
1666	GBADGO CHARLOTTE	Female	1	2	3	2	2
1667	GODOMEY ABRAHAM	Male	2	3	5	4	4
1668	GYAN FELICIA	Female	1	2	3	2	2
1669	ADETI CLIFFORD KWABLA	Male	2	3	5	4	4
1670	GYAN MANTEY	Male	2	3	5	4	4
1671	GYEKYE EMMANUEL	Male	2	3	5	4	4
1672	HAGAN EDWIN EBOH	Male	2	3	5	4	4
1673	ADINKRAH ABIGAIL	Female	1	2	3	2	2
1674	HAMMOND NATHANIEL	Male	2	3	5	4	4
1675	IBRAHIM MOHAMMED SANUSI	Male	2	3	5	4	4
1676	IBRAHIM SEMIRATU	Female	1	2	3	2	2
1677	ADIOK JOSHUA ALLEN	Male	2	3	5	4	4
1678	INUSAH MOHAMMED	Male	2	3	5	4	4
1679	KABAH ALIAYIRE ALEX	Male	2	3	5	4	4
1680	KELVIN NKANSAH	Male	2	3	5	4	4
1681	ADJAKLOE FLOSSIE DZIFA	Female	1	2	3	2	2
1682	KUDJUH BRIGHT DOSU	Male	2	3	5	4	4
1683	KUMI DANIEL DARKO	Male	2	3	5	4	4
1684	KUMI MARY POKUAA	Female	1	2	3	2	2
1685	ADJASOO LINDA SELINAM	Female	1	2	3	2	2
1686	KUSI LYDIA ADJOA ADJEIWAA	Female	1	2	3	2	2
1687	KWARTENG JESSE SARPONG	Male	2	3	5	4	4
1688	LANTEI- LAMPTEY JESSE NII	Male	2	3	5	4	4
1689	ADJEI - BAAH STEPHEN	Male	2	3	5	4	4
1690	MASOPEH FELICIA VANILLA NAA AMELEY	Female	1	2	3	2	2
1691	MENDS FIDELIA APPIAH	Female	1	2	3	2	2
1692	MENSAH BETTY TELUS	Female	1	2	3	2	2
1693	ADJEI BELINDA ADJETEY	Female	1	2	3	2	2
1694	MENSAH CHARLES GYAMFI	Male	2	3	5	4	4
1695	MENSAH PHILOMINA TECHIE	Female	1	2	3	2	2
1696	MENYE GODWIN JR	Male	2	3	5	4	4
1697	ADJEI DANIEL	Male	2	3	5	4	4
1698	MOHAMMED ADAM ZAKIYU	Male	2	3	5	4	4
1699	NARTEH GEOFFREY	Male	2	3	5	4	4
1700	NKANSAH LOCTUS ADJEI	Female	1	2	3	2	2
1701	ADJEI HENRY	Male	2	3	5	4	4
1702	NORTEY NICHOLAS	Male	2	3	5	4	4
1703	NUAMAH SAMUEL	Male	2	3	5	4	4
1704	NUKPE DAVID CONVERY	Male	2	3	5	4	4
1705	ADJEI JENNIFER ODUA	Female	1	2	3	2	2
1706	NYARKO ANISA	Female	1	2	3	2	2
1707	NYARKO NICHOLAS	Male	2	3	5	4	4
1708	NYARKO WILLIAM KWABENA	Male	2	3	5	4	4
1709	ADJEIBEA RACHEAL	Female	1	2	3	2	2
1710	NYEDU ISHMAEL	Male	2	3	5	4	4
1711	OBENG JULIANA	Female	1	2	3	2	2
1712	OBUOBI SOLOMON	Male	2	3	5	4	4
1713	ADJETEY ERAMI NII ADJEI	Male	2	3	5	4	4
1714	ODOI ERIC AKO	Male	2	3	5	4	4
1715	OFFEI OSEI FRANCIS	Male	2	3	5	4	4
1716	OPOKU SAMUEL	Male	2	3	5	4	4
1717	ADJIN-TETTEY JEREMIAH	Male	2	3	5	4	4
1718	OPOKUA GIFTY NANA AMA	Female	1	2	3	2	2
1719	OSEI RICHMOND KOFI	Male	2	3	5	4	4
1720	OUEDORAOGO ROGER PETER	Male	2	3	5	4	4
1721	ADJOKATSE BERNICE	Female	1	2	3	2	2
1722	OWUSU ALEX	Male	2	3	5	4	4
1723	OWUSU-APENTENG STEPHEN	Male	2	3	5	4	4
1724	PARRY JESSICA	Male	2	3	5	4	4
1725	ADOM JENNIFER ESTHER OHENEBA	Female	1	2	3	2	2
1726	QUAICOE ENOCH	Male	2	3	5	4	4
1727	QUANSAH BELINDA	Female	1	2	3	2	2
1728	QUARTEY EVELYN NAA KWARLEY	Female	1	2	3	2	2
1729	ADOM KWADWO BOAKYE	Male	2	3	5	4	4
1730	QUARTEY SALOMEY	Female	1	2	3	2	2
1731	SAHEED AZEEZAT	Female	1	2	3	2	2
1732	SHAIBU FAUZIYATU	Female	1	2	3	2	2
1733	ADU BONA SUSANNA	Female	1	2	3	2	2
1734	SOWAH ALEXANDRA ENYONAM	Female	1	2	3	2	2
1735	SULLEY HINDU MUNIRU	Female	1	2	3	2	2
1736	TAGOE DAVID	Male	2	3	5	4	4
1737	ADU DORA	Female	1	2	3	2	2
1738	TAWIAH ADAMA OKOE	Male	2	3	5	4	4
1739	TETTEH KELVIN	Male	2	3	5	4	4
1740	TETTEH MALVIN	Male	2	3	5	4	4
1741	ADU PRISCILLA NKETIA	Female	1	2	3	2	2
1742	WADIE LINDA NKANSAH	Female	1	2	3	2	2
1743	WENOMA LINDA	Female	1	2	3	2	2
1744	YARTEY SEFIATU	Female	1	2	3	2	2
1745	ADU-AGYEI AWURA AKUA	Female	1	2	3	2	2
1746	OWUSU ALEX	Male	2	3	5	4	4
1747	OWUSU-APENTENG STEPHEN	Male	2	3	5	4	4
1748	PARRY JESSICA	Male	2	3	5	4	4
1749	ADU-TWUM FREDERICK ASANTE	Male	2	3	5	4	4
1750	QUAICOE ENOCH	Male	2	3	5	4	4
1751	QUANSAH BELINDA	Female	1	2	3	2	2
1752	QUARTEY EVELYN NAA KWARLEY	Female	1	2	3	2	2
1753	ADUSEI GIFTY YEBOAH	Female	1	2	3	2	2
1754	QUARTEY SALOMEY	Female	1	2	3	2	2
1755	SAHEED AZEEZAT	Female	1	2	3	2	2
1756	SHAIBU FAUZIYATU	Female	1	2	3	2	2
1757	ADUUM REBECCA	Female	1	2	3	2	2
1758	AFARI STEPHEN	Male	2	3	5	4	4
1759	AFOTEY PATRICK DUNYO	Male	2	3	5	4	4
1760	AFRAH TRACY NTOW	Female	1	2	3	2	2
1761	ABABIO ABEDNEGO A.	Male	2	3	5	4	4
1762	ABOAGYE ELIZABETH BOADIWAA	Female	1	2	3	2	2
1763	ABOE ANDREWS	Male	2	3	5	4	4
1764	ABRAHAM-QUANSAH MARY EVA	Female	1	2	3	2	2
1765	ABALEM JENNIFER	Female	1	2	3	2	2
1766	ADDAE SANDRA	Female	1	2	3	2	2
1767	ADJEI FREDERICK YAW	Male	2	3	5	4	4
1768	ADJEI PRINCE BAFFOUR	Male	2	3	5	4	4
1769	ABBAN VIDA OWUSU	Female	1	2	3	2	2
1770	ADJEI SAMUEL	Male	2	3	5	4	4
1771	ADJORLOLO MERCY NORKPLIM	Female	1	2	3	2	2
1772	ADOCTOR VICTORIA	Female	1	2	3	2	2
1773	ADU AFRIYIE	Male	2	3	5	4	4
1774	ADU EMMANUEL	Male	2	3	5	4	4
1775	ADZOWU MILLICENT	Female	1	2	3	2	2
1776	AFORDE JAMES ABLORDE	Male	2	3	5	4	4
1777	ABDALLAH FATIMATU	Female	1	2	3	2	2
1778	AGBENYEGA STEPHEN	Male	2	3	5	4	4
1779	AGBOGBA LANDRY KWAME	Male	2	3	5	4	4
1780	AGGERH BARNABAS KOBBY	Male	2	3	5	4	4
1781	ABDULAI FAIZA	Female	1	2	3	2	2
1782	AGOE JEHOSHAPHAT SOWAH	Male	2	3	5	4	4
1783	AGUDA NARKIE PATRICIA	Female	1	2	3	2	2
1784	AGYARE PRISCILLA DARFOUR	Female	1	2	3	2	2
1785	ABEKAH EMMANUEL	Male	2	3	5	4	4
1786	AGYEI RICHARD KWAME	Male	2	3	5	4	4
1787	AGYEMAN DUAH BOATEMAA	Female	1	2	3	2	2
1788	AGYEMAN PAUL BOAKYE	Male	2	3	5	4	4
1789	ABOAGYE DAVID ADU	Male	2	3	5	4	4
1790	AGYIRI GEORGINA	Female	1	2	3	2	2
1791	AHIABLEY PORTIA	Female	1	2	3	2	2
1792	AHONI MAUDLIN AYONGO	Female	1	2	3	2	2
1793	ABOAGYE FELIX	Male	2	3	5	4	4
1794	AKAGBO REBECCA	Female	1	2	3	2	2
1795	AKOTO REINDOLF APPIAH	Male	2	3	5	4	4
1796	AKUFFO GIDEON	Male	2	3	5	4	4
1797	ABU ABDUL MANAF	Male	2	3	5	4	4
1798	ALAGBO EMMANUEL	Male	2	3	5	4	4
1799	ALLOTEY KPAKPO VINCENT	Male	2	3	5	4	4
1800	ALLOTEY PEARL NAA AKU	Female	1	2	3	2	2
1801	ABUBAKAR ARAFAT SUFYAN	Male	2	3	5	4	4
1802	AMAKYE JAMES SARPONG	Male	2	3	5	4	4
1803	AMEVOR ERIC	Male	2	3	5	4	4
1804	AMOAH CHARLOTTE KORKOR	Female	1	2	3	2	2
1805	ACHEAMPONG CHRISTABEL	Female	1	2	3	2	2
1806	AMOAH MILDRED	Female	1	2	3	2	2
1807	AMOAKO ERNESTINA OPOKUA	Female	1	2	3	2	2
1808	AMPONSAH CECILIA ABENA	Female	1	2	3	2	2
1809	ACHEAMPONG KINGSLEY	Male	2	3	5	4	4
1810	AMUZU STELLA KABUKI	Female	1	2	3	2	2
1811	ANABI MUSAH AHMED	Male	2	3	5	4	4
1812	ANDERSON GIFTY	Female	1	2	3	2	2
1813	ACHEAMPONG MICHAEL APPIAH	Male	2	3	5	4	4
1814	ANDERSON VIVIAN	Female	1	2	3	2	2
1815	ANKOMAH GEORGINA	Female	1	2	3	2	2
1816	ANNANG FRANCISCA TORSHIE	Female	1	2	3	2	2
1817	ACQUAH BENJAMIN	Male	2	3	5	4	4
1818	ANNOR RICHAEL	Female	1	2	3	2	2
1819	ANSAH FAUSTINA	Female	1	2	3	2	2
1820	ANSAH MARFO DOREEN	Female	1	2	3	2	2
1821	ACQUAH KINGSLEY OCANSEY	Male	2	3	5	4	4
1822	ANTHONIO HENRIETTA	Female	1	2	3	2	2
1823	APPIAH ISAAC	Male	2	3	5	4	4
1824	APPIAH MOSES	Male	2	3	5	4	4
1825	ACQUAH PHILIP	Male	2	3	5	4	4
1826	APPIAH PRINCE KWESI	Male	2	3	5	4	4
1827	ARKO HAGAR	Female	1	2	3	2	2
1828	ARKOH GALAHAD AHINSAH	Female	1	2	3	2	2
1829	ADAM HALIMATU SADIA	Female	1	2	3	2	2
1830	ARTHUR EBENEZER	Male	2	3	5	4	4
1831	ARTHUR ESSUMAN JAMES	Male	2	3	5	4	4
1832	ARYEETEY MESHACK	Male	2	3	5	4	4
1833	ADAMA-TETTEY MARYNSKY	Female	1	2	3	2	2
1834	ASABIRE SOPHIA	Female	1	2	3	2	2
1835	ASAHENE EMMANUELLA	Female	1	2	3	2	2
1836	ASAMANY CARL	Male	2	3	5	4	4
1837	ADAMS AFISHETU	Female	1	2	3	2	2
1838	ASAMOAH MERCY	Female	1	2	3	2	2
1839	ASARE ERIC AGYIRI AWERE	Male	2	3	5	4	4
1840	ASHITEY MCZILL HAFIZ OKO	Male	2	3	5	4	4
1841	ADAMS ANASS	Male	2	3	5	4	4
1842	ASIEDU MAVIS	Female	1	2	3	2	2
1843	ATIEMO JOSEPHINE	Female	1	2	3	2	2
1844	AWUDER WILLIAM YAO	Male	2	3	5	4	4
1845	ADARKWAH IRENE	Female	1	2	3	2	2
1846	AYER PERCY OKAI	Male	2	3	5	4	4
1847	AYISI BENJAMIN	Male	2	3	5	4	4
1848	AZAMETSI MIRABLE	Female	1	2	3	2	2
1849	ADDAE PORTIA	Female	1	2	3	2	2
1850	BEDIAKO PRISCILLA ODURO	Female	1	2	3	2	2
1851	BELLEY BETTY	Female	1	2	3	2	2
1852	BOATEMAA SLYVIA	Female	1	2	3	2	2
1853	ADDEY AUGUSTINE	Male	2	3	5	4	4
1854	BOATENG ABRAHAM AMEGAVIE	Male	2	3	5	4	4
1855	BONDZIE SAMUEL AIDOO	Male	2	3	5	4	4
1856	BONI MAXWELL EDEM	Male	2	3	5	4	4
1857	ADDICO FRANCIS AWULEY	Male	2	3	5	4	4
1858	BOTCHWAY HANNAH	Female	1	2	3	2	2
1859	BOTCHWAY JEMIMA ATSWEI	Female	1	2	3	2	2
1860	BOTCHWAY MICHAEL	Male	2	3	5	4	4
1861	ADDISON EMMANUEL	Male	2	3	5	4	4
1862	BOYETEY SOLOMON BUERNOR	Male	2	3	5	4	4
1863	BRENYAH SYLVESTER	Male	2	3	5	4	4
1864	CLELAND VERA VASTU	Female	1	2	3	2	2
1865	ADDISON STEPHEN EBO	Male	2	3	5	4	4
1866	DADZIE ISAAC	Male	2	3	5	4	4
1867	DAMALIE DEBORAH YAYRA	Female	1	2	3	2	2
1868	DARKO MOSES	Male	2	3	5	4	4
1869	ADDO NAOMI	Female	1	2	3	2	2
1870	DARKOA DORA	Female	1	2	3	2	2
1871	DENTAAH AMPOFO PATIENCE O.	Female	1	2	3	2	2
1872	DJIDONU DANIEL KWESI	Male	2	3	5	4	4
1873	ADDO PATIENCE	Female	1	2	3	2	2
1874	DOE KENNEDY	Male	2	3	5	4	4
1875	DOKU ESTHER MAKU	Female	1	2	3	2	2
1876	DOWUONA PRISCILLA NORKAI	Female	1	2	3	2	2
1877	ADDY MELIORA GENEVIEVE	Female	1	2	3	2	2
1878	DZRAMADO SANDRA	Female	1	2	3	2	2
1879	DZUFLE BRIDGET	Female	1	2	3	2	2
1880	EDZEOU BERNARD	Male	2	3	5	4	4
1881	ADEKPUITOR PETER	Male	2	3	5	4	4
1882	ENTSIEH EVANS	Male	2	3	5	4	4
1883	FOMETU GLADYS COURINE	Female	1	2	3	2	2
1884	GANYO REBECCA EYRAM	Female	1	2	3	2	2
1885	ADEKU CALEB KOJO	Male	2	3	5	4	4
1886	GBADGO CHARLOTTE	Female	1	2	3	2	2
1887	GODOMEY ABRAHAM	Male	2	3	5	4	4
1888	GYAN FELICIA	Female	1	2	3	2	2
1889	ADETI CLIFFORD KWABLA	Male	2	3	5	4	4
1890	GYAN MANTEY	Male	2	3	5	4	4
1891	GYEKYE EMMANUEL	Male	2	3	5	4	4
1892	HAGAN EDWIN EBOH	Male	2	3	5	4	4
1893	ADINKRAH ABIGAIL	Female	1	2	3	2	2
1894	HAMMOND NATHANIEL	Male	2	3	5	4	4
1895	IBRAHIM MOHAMMED SANUSI	Male	2	3	5	4	4
1896	IBRAHIM SEMIRATU	Female	1	2	3	2	2
1897	ADIOK JOSHUA ALLEN	Male	2	3	5	4	4
1898	INUSAH MOHAMMED	Male	2	3	5	4	4
1899	KABAH ALIAYIRE ALEX	Male	2	3	5	4	4
1900	KELVIN NKANSAH	Male	2	3	5	4	4
1901	ADJAKLOE FLOSSIE DZIFA	Female	1	2	3	2	2
1902	KUDJUH BRIGHT DOSU	Male	2	3	5	4	4
1903	KUMI DANIEL DARKO	Male	2	3	5	4	4
1904	KUMI MARY POKUAA	Female	1	2	3	2	2
1905	ADJASOO LINDA SELINAM	Female	1	2	3	2	2
1906	KUSI LYDIA ADJOA ADJEIWAA	Female	1	2	3	2	2
1907	KWARTENG JESSE SARPONG	Male	2	3	5	4	4
1908	LANTEI- LAMPTEY JESSE NII	Male	2	3	5	4	4
1909	ADJEI - BAAH STEPHEN	Male	2	3	5	4	4
1910	MASOPEH FELICIA VANILLA NAA AMELEY	Female	1	2	3	2	2
1911	MENDS FIDELIA APPIAH	Female	1	2	3	2	2
1912	MENSAH BETTY TELUS	Female	1	2	3	2	2
1913	ADJEI BELINDA ADJETEY	Female	1	2	3	2	2
1914	MENSAH CHARLES GYAMFI	Male	2	3	5	4	4
1915	MENSAH PHILOMINA TECHIE	Female	1	2	3	2	2
1916	MENYE GODWIN JR	Male	2	3	5	4	4
1917	ADJEI DANIEL	Male	2	3	5	4	4
1918	MOHAMMED ADAM ZAKIYU	Male	2	3	5	4	4
1919	NARTEH GEOFFREY	Male	2	3	5	4	4
1920	NKANSAH LOCTUS ADJEI	Female	1	2	3	2	2
1921	ADJEI HENRY	Male	2	3	5	4	4
1922	NORTEY NICHOLAS	Male	2	3	5	4	4
1923	NUAMAH SAMUEL	Male	2	3	5	4	4
1924	NUKPE DAVID CONVERY	Male	2	3	5	4	4
1925	ADJEI JENNIFER ODUA	Female	1	2	3	2	2
1926	NYARKO ANISA	Female	1	2	3	2	2
1927	NYARKO NICHOLAS	Male	2	3	5	4	4
1928	NYARKO WILLIAM KWABENA	Male	2	3	5	4	4
1929	ADJEIBEA RACHEAL	Female	1	2	3	2	2
1930	NYEDU ISHMAEL	Male	2	3	5	4	4
1931	OBENG JULIANA	Female	1	2	3	2	2
1932	OBUOBI SOLOMON	Male	2	3	5	4	4
1933	ADJETEY ERAMI NII ADJEI	Male	2	3	5	4	4
1934	ODOI ERIC AKO	Male	2	3	5	4	4
1935	OFFEI OSEI FRANCIS	Male	2	3	5	4	4
1936	OPOKU SAMUEL	Male	2	3	5	4	4
1937	ADJIN-TETTEY JEREMIAH	Male	2	3	5	4	4
1938	OPOKUA GIFTY NANA AMA	Female	1	2	3	2	2
1939	OSEI RICHMOND KOFI	Male	2	3	5	4	4
1940	OUEDORAOGO ROGER PETER	Male	2	3	5	4	4
1941	ADJOKATSE BERNICE	Female	1	2	3	2	2
1942	OWUSU ALEX	Male	2	3	5	4	4
1943	OWUSU-APENTENG STEPHEN	Male	2	3	5	4	4
1944	PARRY JESSICA	Male	2	3	5	4	4
1945	ADOM JENNIFER ESTHER OHENEBA	Female	1	2	3	2	2
1946	QUAICOE ENOCH	Male	2	3	5	4	4
1947	QUANSAH BELINDA	Female	1	2	3	2	2
1948	QUARTEY EVELYN NAA KWARLEY	Female	1	2	3	2	2
1949	ADOM KWADWO BOAKYE	Male	2	3	5	4	4
1950	QUARTEY SALOMEY	Female	1	2	3	2	2
1951	SAHEED AZEEZAT	Female	1	2	3	2	2
1952	SHAIBU FAUZIYATU	Female	1	2	3	2	2
1953	ADU BONA SUSANNA	Female	1	2	3	2	2
1954	SOWAH ALEXANDRA ENYONAM	Female	1	2	3	2	2
1955	SULLEY HINDU MUNIRU	Female	1	2	3	2	2
1956	TAGOE DAVID	Male	2	3	5	4	4
1957	ADU DORA	Female	1	2	3	2	2
1958	TAWIAH ADAMA OKOE	Male	2	3	5	4	4
1959	TETTEH KELVIN	Male	2	3	5	4	4
1960	TETTEH MALVIN	Male	2	3	5	4	4
1961	ADU PRISCILLA NKETIA	Female	1	2	3	2	2
1962	WADIE LINDA NKANSAH	Female	1	2	3	2	2
1963	WENOMA LINDA	Female	1	2	3	2	2
1964	YARTEY SEFIATU	Female	1	2	3	2	2
1965	ADU-AGYEI AWURA AKUA	Female	1	2	3	2	2
1966	OWUSU ALEX	Male	2	3	5	4	4
1967	OWUSU-APENTENG STEPHEN	Male	2	3	5	4	4
1968	PARRY JESSICA	Male	2	3	5	4	4
1969	ADU-TWUM FREDERICK ASANTE	Male	2	3	5	4	4
1970	QUAICOE ENOCH	Male	2	3	5	4	4
1971	QUANSAH BELINDA	Female	1	2	3	2	2
1972	QUARTEY EVELYN NAA KWARLEY	Female	1	2	3	2	2
1973	ADUSEI GIFTY YEBOAH	Female	1	2	3	2	2
1974	QUARTEY SALOMEY	Female	1	2	3	2	2
1975	SAHEED AZEEZAT	Female	1	2	3	2	2
1976	SHAIBU FAUZIYATU	Female	1	2	3	2	2
1977	ADUUM REBECCA	Female	1	2	3	2	2
1978	AFARI STEPHEN	Male	2	3	5	4	4
1979	AFOTEY PATRICK DUNYO	Male	2	3	5	4	4
1980	AFRAH TRACY NTOW	Female	1	2	3	2	2
1981	ABABIO ABEDNEGO A.	Male	2	3	5	4	4
1982	ABOAGYE ELIZABETH BOADIWAA	Female	1	2	3	2	2
1983	ABOE ANDREWS	Male	2	3	5	4	4
1984	ABRAHAM-QUANSAH MARY EVA	Female	1	2	3	2	2
1985	ABALEM JENNIFER	Female	1	2	3	2	2
1986	ADDAE SANDRA	Female	1	2	3	2	2
1987	ADJEI FREDERICK YAW	Male	2	3	5	4	4
1988	ADJEI PRINCE BAFFOUR	Male	2	3	5	4	4
1989	ABBAN VIDA OWUSU	Female	1	2	3	2	2
1990	ADJEI SAMUEL	Male	2	3	5	4	4
1991	ADJORLOLO MERCY NORKPLIM	Female	1	2	3	2	2
1992	ADOCTOR VICTORIA	Female	1	2	3	2	2
1993	ADU AFRIYIE	Male	2	3	5	4	4
1994	ADU EMMANUEL	Male	2	3	5	4	4
1995	ADZOWU MILLICENT	Female	1	2	3	2	2
1996	AFORDE JAMES ABLORDE	Male	2	3	5	4	4
1997	ABDALLAH FATIMATU	Female	1	2	3	2	2
[truncated: 2,404 more rows]

## Sheet: TV Program Ratings-Sports
ACCRA TECHNICAL UNIVERSITY
ATU Dataset - HND Marketing		MOVIE/TV SERIES RATINGS (1 - 5)								TV PROGRAM RATINGS (1 - 5)
No.	NAME	SEX	FOOTBALL	BASKETBALL	HOCKEY	BOXING	ATHLETICS			1	2	3	4	5
1	ABABIO ABEDNEGO A.	Male	5	3	1	4	2		Football	1975	0	0	0	2421
2	ABOAGYE ELIZABETH BOADIWAA	Female	1	1	1	1	1		Basketball	1381	594	2421	0	594
3	ABOE ANDREWS	Male	5	3	1	4	2		Hockey	2978	108	570	148	592
4	ABRAHAM-QUANSAH MARY EVA	Female	1	1	1	1	1		Boxing	1381	0	594	1483	938
5	ABALEM JENNIFER	Female	1	1	1	1	1		Athletics	1381	2077	0	938	0
6	ADDAE SANDRA	Female	1	1	1	1	1		Total Ratings	9097	2781	3588	2573	4550
7	ADJEI FREDERICK YAW	Male	5	3	1	4	2		Grand Total of all Ratings	22589
8	ADJEI PRINCE BAFFOUR	Male	5	3	1	4	2
9	ABBAN VIDA OWUSU	Female	1	1	1	1	1
10	ADJEI SAMUEL	Male	5	3	1	4	2
11	ADJORLOLO MERCY NORKPLIM	Female	1	1	1	1	1
12	ADOCTOR VICTORIA	Female	1	1	1	1	1
13	ADU AFRIYIE	Male	5	3	1	4	2
14	ADU EMMANUEL	Male	5	3	1	4	2
15	ADZOWU MILLICENT	Female	1	1	1	1	1
16	AFORDE JAMES ABLORDE	Male	5	3	1	4	2
17	ABDALLAH FATIMATU	Female	1	1	1	1	1
18	AGBENYEGA STEPHEN	Male	5	3	1	4	2
19	AGBOGBA LANDRY KWAME	Male	5	3	1	4	2
20	AGGERH BARNABAS KOBBY	Male	5	3	1	4	2
21	ABDULAI FAIZA	Female	1	1	1	1	1
22	AGOE JEHOSHAPHAT SOWAH	Male	5	3	1	4	2
23	AGUDA NARKIE PATRICIA	Female	1	1	1	1	1
24	AGYARE PRISCILLA DARFOUR	Female	1	1	1	1	1
25	ABEKAH EMMANUEL	Male	5	3	1	4	2
26	AGYEI RICHARD KWAME	Male	5	3	1	4	2
27	AGYEMAN DUAH BOATEMAA	Female	1	1	1	1	1
28	AGYEMAN PAUL BOAKYE	Male	5	3	1	4	2
29	ABOAGYE DAVID ADU	Male	5	3	1	4	2
30	AGYIRI GEORGINA	Female	1	1	1	1	1
31	AHIABLEY PORTIA	Female	1	1	1	1	1
32	AHONI MAUDLIN AYONGO	Female	1	1	1	1	1
33	ABOAGYE FELIX	Male	5	3	1	4	2
34	AKAGBO REBECCA	Female	1	1	1	1	1
35	AKOTO REINDOLF APPIAH	Male	5	3	1	4	2
36	AKUFFO GIDEON	Male	5	3	1	4	2
37	ABU ABDUL MANAF	Male	5	3	1	4	2
38	ALAGBO EMMANUEL	Male	5	3	1	4	2
39	ALLOTEY KPAKPO VINCENT	Male	5	3	1	4	2
40	ALLOTEY PEARL NAA AKU	Female	1	1	1	1	1
41	ABUBAKAR ARAFAT SUFYAN	Male	5	3	1	4	2
42	AMAKYE JAMES SARPONG	Male	5	3	1	4	2
43	AMEVOR ERIC	Male	5	3	1	4	2
44	AMOAH CHARLOTTE KORKOR	Female	1	1	1	1	1
45	ACHEAMPONG CHRISTABEL	Female	1	1	1	1	1
46	AMOAH MILDRED	Female	1	1	1	1	1
47	AMOAKO ERNESTINA OPOKUA	Female	1	1	1	1	1
48	AMPONSAH CECILIA ABENA	Female	1	1	1	1	1
49	ACHEAMPONG KINGSLEY	Male	5	3	1	4	2
50	AMUZU STELLA KABUKI	Female	1	1	1	1	1
51	ANABI MUSAH AHMED	Male	5	3	1	4	2
52	ANDERSON GIFTY	Female	1	1	1	1	1
53	ACHEAMPONG MICHAEL APPIAH	Male	5	3	1	4	2
54	ANDERSON VIVIAN	Female	1	1	1	1	1
55	ANKOMAH GEORGINA	Female	1	1	1	1	1
56	ANNANG FRANCISCA TORSHIE	Female	1	1	1	1	1
57	ACQUAH BENJAMIN	Male	5	3	1	4	2
58	ANNOR RICHAEL	Female	1	1	1	1	1
59	ANSAH FAUSTINA	Female	1	1	1	1	1
60	ANSAH MARFO DOREEN	Female	1	1	1	1	1
61	ACQUAH KINGSLEY OCANSEY	Male	5	3	1	4	2
62	ANTHONIO HENRIETTA	Female	1	1	1	1	1
63	APPIAH ISAAC	Male	5	3	1	4	2
64	APPIAH MOSES	Male	5	3	1	4	2
65	ACQUAH PHILIP	Male	5	3	1	4	2
66	APPIAH PRINCE KWESI	Male	5	3	1	4	2
67	ARKO HAGAR	Female	1	1	1	1	1
68	ARKOH GALAHAD AHINSAH	Female	1	1	1	1	1
69	ADAM HALIMATU SADIA	Female	1	1	1	1	1
70	ARTHUR EBENEZER	Male	5	3	1	4	2
71	ARTHUR ESSUMAN JAMES	Male	5	3	1	4	2
72	ARYEETEY MESHACK	Male	5	3	1	4	2
73	ADAMA-TETTEY MARYNSKY	Female	1	1	1	1	1
74	ASABIRE SOPHIA	Female	1	1	1	1	1
75	ASAHENE EMMANUELLA	Female	1	1	1	1	1
76	ASAMANY CARL	Male	5	3	1	4	2
77	ADAMS AFISHETU	Female	1	1	1	1	1
78	ASAMOAH MERCY	Female	1	1	1	1	1
79	ASARE ERIC AGYIRI AWERE	Male	5	3	1	4	2
80	ASHITEY MCZILL HAFIZ OKO	Male	5	3	1	4	2
81	ADAMS ANASS	Male	5	3	1	4	2
82	ASIEDU MAVIS	Female	1	1	1	1	1
83	ATIEMO JOSEPHINE	Female	1	1	1	1	1
84	AWUDER WILLIAM YAO	Male	5	3	1	4	2
85	ADARKWAH IRENE	Female	1	1	1	1	1
86	AYER PERCY OKAI	Male	5	3	1	4	2
87	AYISI BENJAMIN	Male	5	3	1	4	2
88	AZAMETSI MIRABLE	Female	1	1	1	1	1
89	ADDAE PORTIA	Female	1	1	1	1	1
90	BEDIAKO PRISCILLA ODURO	Female	1	1	1	1	1
91	BELLEY BETTY	Female	1	1	1	1	1
92	BOATEMAA SLYVIA	Female	1	1	1	1	1
93	ADDEY AUGUSTINE	Male	5	3	1	4	2
94	BOATENG ABRAHAM AMEGAVIE	Male	5	3	1	4	2
95	BONDZIE SAMUEL AIDOO	Male	5	3	1	4	2
96	BONI MAXWELL EDEM	Male	5	3	1	4	2
97	ADDICO FRANCIS AWULEY	Male	5	3	1	4	2
98	BOTCHWAY HANNAH	Female	1	1	1	1	1
99	BOTCHWAY JEMIMA ATSWEI	Female	1	1	1	1	1
100	BOTCHWAY MICHAEL	Male	5	3	1	4	2
101	ADDISON EMMANUEL	Male	5	3	1	4	2
102	BOYETEY SOLOMON BUERNOR	Male	5	3	1	4	2
103	BRENYAH SYLVESTER	Male	5	3	1	4	2
104	CLELAND VERA VASTU	Female	1	1	1	1	1
105	ADDISON STEPHEN EBO	Male	5	3	1	4	2
106	DADZIE ISAAC	Male	5	3	1	4	2
107	DAMALIE DEBORAH YAYRA	Female	1	1	1	1	1
108	DARKO MOSES	Male	5	3	1	4	2
109	ADDO NAOMI	Female	1	1	1	1	1
110	DARKOA DORA	Female	1	1	1	1	1
111	DENTAAH AMPOFO PATIENCE O.	Female	1	1	1	1	1
112	DJIDONU DANIEL KWESI	Male	5	3	1	4	2
113	ADDO PATIENCE	Female	1	1	1	1	1
114	DOE KENNEDY	Male	5	3	1	4	2
115	DOKU ESTHER MAKU	Female	1	1	1	1	1
116	DOWUONA PRISCILLA NORKAI	Female	1	1	1	1	1
117	ADDY MELIORA GENEVIEVE	Female	1	1	1	1	1
118	DZRAMADO SANDRA	Female	1	1	1	1	1
119	DZUFLE BRIDGET	Female	1	1	1	1	1
120	EDZEOU BERNARD	Male	5	3	1	4	2
121	ADEKPUITOR PETER	Male	5	3	1	4	2
122	ENTSIEH EVANS	Male	5	3	1	4	2
123	FOMETU GLADYS COURINE	Female	1	1	1	1	1
124	GANYO REBECCA EYRAM	Female	1	1	1	1	1
125	ADEKU CALEB KOJO	Male	5	3	1	4	2
126	GBADGO CHARLOTTE	Female	1	1	1	1	1
127	GODOMEY ABRAHAM	Male	5	3	1	4	2
128	GYAN FELICIA	Female	1	1	1	1	1
129	ADETI CLIFFORD KWABLA	Male	5	3	1	4	2
130	GYAN MANTEY	Male	5	3	1	4	2
131	GYEKYE EMMANUEL	Male	5	3	1	4	2
132	HAGAN EDWIN EBOH	Male	5	3	1	4	2
133	ADINKRAH ABIGAIL	Female	1	1	1	1	1
134	HAMMOND NATHANIEL	Male	5	3	1	4	2
135	IBRAHIM MOHAMMED SANUSI	Male	5	3	1	4	2
136	IBRAHIM SEMIRATU	Female	1	1	1	1	1
137	ADIOK JOSHUA ALLEN	Male	5	3	1	4	2
138	INUSAH MOHAMMED	Male	5	3	1	4	2
139	KABAH ALIAYIRE ALEX	Male	5	3	1	4	2
140	KELVIN NKANSAH	Male	5	3	1	4	2
141	ADJAKLOE FLOSSIE DZIFA	Female	1	1	1	1	1
142	KUDJUH BRIGHT DOSU	Male	5	3	1	4	2
143	KUMI DANIEL DARKO	Male	5	3	1	4	2
144	KUMI MARY POKUAA	Female	1	1	1	1	1
145	ADJASOO LINDA SELINAM	Female	1	1	1	1	1
146	KUSI LYDIA ADJOA ADJEIWAA	Female	1	1	1	1	1
147	KWARTENG JESSE SARPONG	Male	5	3	1	4	2
148	LANTEI- LAMPTEY JESSE NII	Male	5	3	1	4	2
149	ADJEI - BAAH STEPHEN	Male	5	3	1	4	2
150	MASOPEH FELICIA VANILLA NAA AMELEY	Female	1	1	1	1	1
151	MENDS FIDELIA APPIAH	Female	1	1	1	1	1
152	MENSAH BETTY TELUS	Female	1	1	1	1	1
153	ADJEI BELINDA ADJETEY	Female	1	1	1	1	1
154	MENSAH CHARLES GYAMFI	Male	5	3	1	4	2
155	MENSAH PHILOMINA TECHIE	Female	1	1	1	1	1
156	MENYE GODWIN JR	Male	5	3	1	4	2
157	ADJEI DANIEL	Male	5	3	1	4	2
158	MOHAMMED ADAM ZAKIYU	Male	5	3	1	4	2
159	NARTEH GEOFFREY	Male	5	3	1	4	2
160	NKANSAH LOCTUS ADJEI	Female	1	1	1	1	1
161	ADJEI HENRY	Male	5	3	1	4	2
162	NORTEY NICHOLAS	Male	5	3	1	4	2
163	NUAMAH SAMUEL	Male	5	3	1	4	2
164	NUKPE DAVID CONVERY	Male	5	3	1	4	2
165	ADJEI JENNIFER ODUA	Female	1	1	1	1	1
166	NYARKO ANISA	Female	1	1	1	1	1
167	NYARKO NICHOLAS	Male	5	3	1	4	2
168	NYARKO WILLIAM KWABENA	Male	5	3	1	4	2
169	ADJEIBEA RACHEAL	Female	1	1	1	1	1
170	NYEDU ISHMAEL	Male	5	3	1	4	2
171	OBENG JULIANA	Female	1	1	1	1	1
172	OBUOBI SOLOMON	Male	5	3	1	4	2
173	ADJETEY ERAMI NII ADJEI	Male	5	3	1	4	2
174	ODOI ERIC AKO	Male	5	3	1	4	2
175	OFFEI OSEI FRANCIS	Male	5	3	1	4	2
176	OPOKU SAMUEL	Male	5	3	1	4	2
177	ADJIN-TETTEY JEREMIAH	Male	5	3	1	4	2
178	OPOKUA GIFTY NANA AMA	Female	1	1	1	1	1
179	OSEI RICHMOND KOFI	Male	5	3	1	4	2
180	OUEDORAOGO ROGER PETER	Male	5	3	1	4	2
181	ADJOKATSE BERNICE	Female	1	1	1	1	1
182	OWUSU ALEX	Male	5	3	1	4	2
183	OWUSU-APENTENG STEPHEN	Male	5	3	1	4	2
184	PARRY JESSICA	Male	5	3	1	4	2
185	ADOM JENNIFER ESTHER OHENEBA	Female	1	1	1	1	1
186	QUAICOE ENOCH	Male	5	3	1	4	2
187	QUANSAH BELINDA	Female	1	1	1	1	1
188	QUARTEY EVELYN NAA KWARLEY	Female	1	1	1	1	1
189	ADOM KWADWO BOAKYE	Male	5	3	1	4	2
190	QUARTEY SALOMEY	Female	1	1	1	1	1
191	SAHEED AZEEZAT	Female	1	1	1	1	1
192	SHAIBU FAUZIYATU	Female	1	1	1	1	1
193	ADU BONA SUSANNA	Female	1	1	1	1	1
194	SOWAH ALEXANDRA ENYONAM	Female	1	1	1	1	1
195	SULLEY HINDU MUNIRU	Female	1	1	1	1	1
196	TAGOE DAVID	Male	5	3	1	4	2
197	ADU DORA	Female	1	1	1	1	1
198	TAWIAH ADAMA OKOE	Male	5	3	1	4	2
199	TETTEH KELVIN	Male	5	3	1	4	2
200	TETTEH MALVIN	Male	5	3	1	4	2
201	ADU PRISCILLA NKETIA	Female	1	1	1	1	1
202	WADIE LINDA NKANSAH	Female	1	1	1	1	1
203	WENOMA LINDA	Female	1	1	1	1	1
204	YARTEY SEFIATU	Female	1	1	1	1	1
205	ADU-AGYEI AWURA AKUA	Female	1	1	1	1	1
206	OWUSU ALEX	Male	5	3	1	4	2
207	OWUSU-APENTENG STEPHEN	Male	5	3	1	4	2
208	PARRY JESSICA	Male	5	3	1	4	2
209	ADU-TWUM FREDERICK ASANTE	Male	5	3	1	4	2
210	QUAICOE ENOCH	Male	5	3	1	4	2
211	QUANSAH BELINDA	Female	1	1	1	1	1
212	QUARTEY EVELYN NAA KWARLEY	Female	1	1	1	1	1
213	ADUSEI GIFTY YEBOAH	Female	1	1	1	1	1
214	QUARTEY SALOMEY	Female	1	1	1	1	1
215	SAHEED AZEEZAT	Female	1	1	1	1	1
216	SHAIBU FAUZIYATU	Female	1	1	1	1	1
217	ADUUM REBECCA	Female	1	1	1	1	1
218	AFARI STEPHEN	Male	5	3	1	4	2
219	AFOTEY PATRICK DUNYO	Male	5	3	1	4	2
220	AFRAH TRACY NTOW	Female	1	1	1	1	1
221	ABABIO ABEDNEGO A.	Male	5	3	1	4	2
222	ABOAGYE ELIZABETH BOADIWAA	Female	1	1	1	1	1
223	ABOE ANDREWS	Male	5	3	1	4	2
224	ABRAHAM-QUANSAH MARY EVA	Female	1	1	1	1	1
225	ABALEM JENNIFER	Female	1	1	1	1	1
226	ADDAE SANDRA	Female	1	1	1	1	1
227	ADJEI FREDERICK YAW	Male	5	3	1	4	2
228	ADJEI PRINCE BAFFOUR	Male	5	3	1	4	2
229	ABBAN VIDA OWUSU	Female	1	1	1	1	1
230	ADJEI SAMUEL	Male	5	3	1	4	2
231	ADJORLOLO MERCY NORKPLIM	Female	1	1	1	1	1
232	ADOCTOR VICTORIA	Female	1	1	1	1	1
233	ADU AFRIYIE	Male	5	3	1	4	2
234	ADU EMMANUEL	Male	5	3	1	4	2
235	ADZOWU MILLICENT	Female	1	1	1	1	1
236	AFORDE JAMES ABLORDE	Male	5	3	1	4	2
237	ABDALLAH FATIMATU	Female	1	1	1	1	1
238	AGBENYEGA STEPHEN	Male	5	3	1	4	2
239	AGBOGBA LANDRY KWAME	Male	5	3	1	4	2
240	AGGERH BARNABAS KOBBY	Male	5	3	1	4	2
241	ABDULAI FAIZA	Female	1	1	1	1	1
242	AGOE JEHOSHAPHAT SOWAH	Male	5	3	1	4	2
243	AGUDA NARKIE PATRICIA	Female	1	1	1	1	1
244	AGYARE PRISCILLA DARFOUR	Female	1	1	1	1	1
245	ABEKAH EMMANUEL	Male	5	3	1	4	2
246	AGYEI RICHARD KWAME	Male	5	3	1	4	2
247	AGYEMAN DUAH BOATEMAA	Female	1	1	1	1	1
248	AGYEMAN PAUL BOAKYE	Male	5	3	1	4	2
249	ABOAGYE DAVID ADU	Male	5	3	1	4	2
250	AGYIRI GEORGINA	Female	1	1	1	1	1
251	AHIABLEY PORTIA	Female	1	1	1	1	1
252	AHONI MAUDLIN AYONGO	Female	1	1	1	1	1
253	ABOAGYE FELIX	Male	5	3	1	4	2
254	AKAGBO REBECCA	Female	1	1	1	1	1
255	AKOTO REINDOLF APPIAH	Male	5	3	1	4	2
256	AKUFFO GIDEON	Male	5	3	1	4	2
257	ABU ABDUL MANAF	Male	5	3	1	4	2
258	ALAGBO EMMANUEL	Male	5	3	1	4	2
259	ALLOTEY KPAKPO VINCENT	Male	5	3	1	4	2
260	ALLOTEY PEARL NAA AKU	Female	1	1	1	1	1
261	ABUBAKAR ARAFAT SUFYAN	Male	5	3	1	4	2
262	AMAKYE JAMES SARPONG	Male	5	3	1	4	2
263	AMEVOR ERIC	Male	5	3	1	4	2
264	AMOAH CHARLOTTE KORKOR	Female	1	1	1	1	1
265	ACHEAMPONG CHRISTABEL	Female	1	1	1	1	1
266	AMOAH MILDRED	Female	1	1	1	1	1
267	AMOAKO ERNESTINA OPOKUA	Female	1	1	1	1	1
268	AMPONSAH CECILIA ABENA	Female	1	1	1	1	1
269	ACHEAMPONG KINGSLEY	Male	5	3	1	4	2
270	AMUZU STELLA KABUKI	Female	1	1	1	1	1
271	ANABI MUSAH AHMED	Male	5	3	1	4	2
272	ANDERSON GIFTY	Female	1	1	1	1	1
273	ACHEAMPONG MICHAEL APPIAH	Male	5	3	1	4	2
274	ANDERSON VIVIAN	Female	1	1	1	1	1
275	ANKOMAH GEORGINA	Female	1	1	1	1	1
276	ANNANG FRANCISCA TORSHIE	Female	1	1	1	1	1
277	ACQUAH BENJAMIN	Male	5	3	1	4	2
278	ANNOR RICHAEL	Female	1	1	1	1	1
279	ANSAH FAUSTINA	Female	1	1	1	1	1
280	ANSAH MARFO DOREEN	Female	1	1	1	1	1
281	ACQUAH KINGSLEY OCANSEY	Male	5	3	1	4	2
282	ANTHONIO HENRIETTA	Female	1	1	1	1	1
283	APPIAH ISAAC	Male	5	3	1	4	2
284	APPIAH MOSES	Male	5	3	1	4	2
285	ACQUAH PHILIP	Male	5	3	1	4	2
286	APPIAH PRINCE KWESI	Male	5	3	1	4	2
287	ARKO HAGAR	Female	1	1	1	1	1
288	ARKOH GALAHAD AHINSAH	Female	1	1	1	1	1
289	ADAM HALIMATU SADIA	Female	1	1	1	1	1
290	ARTHUR EBENEZER	Male	5	3	1	4	2
291	ARTHUR ESSUMAN JAMES	Male	5	3	1	4	2
292	ARYEETEY MESHACK	Male	5	3	1	4	2
293	ADAMA-TETTEY MARYNSKY	Female	1	1	1	1	1
294	ASABIRE SOPHIA	Female	1	1	1	1	1
295	ASAHENE EMMANUELLA	Female	1	1	1	1	1
296	ASAMANY CARL	Male	5	3	1	4	2
297	ADAMS AFISHETU	Female	1	1	1	1	1
298	ASAMOAH MERCY	Female	1	1	1	1	1
299	ASARE ERIC AGYIRI AWERE	Male	5	3	1	4	2
300	ASHITEY MCZILL HAFIZ OKO	Male	5	3	1	4	2
301	ADAMS ANASS	Male	5	3	1	4	2
302	ASIEDU MAVIS	Female	1	1	1	1	1
303	ATIEMO JOSEPHINE	Female	1	1	1	1	1
304	AWUDER WILLIAM YAO	Male	5	3	1	4	2
305	ADARKWAH IRENE	Female	1	1	1	1	1
306	AYER PERCY OKAI	Male	5	3	1	4	2
307	AYISI BENJAMIN	Male	5	3	1	4	2
308	AZAMETSI MIRABLE	Female	1	1	1	1	1
309	ADDAE PORTIA	Female	1	1	1	1	1
310	BEDIAKO PRISCILLA ODURO	Female	1	1	1	1	1
311	BELLEY BETTY	Female	1	1	1	1	1
312	BOATEMAA SLYVIA	Female	1	1	1	1	1
313	ADDEY AUGUSTINE	Male	5	3	1	4	2
314	BOATENG ABRAHAM AMEGAVIE	Male	5	3	1	4	2
315	BONDZIE SAMUEL AIDOO	Male	5	3	1	4	2
316	BONI MAXWELL EDEM	Male	5	3	1	4	2
317	ADDICO FRANCIS AWULEY	Male	5	3	1	4	2
318	BOTCHWAY HANNAH	Female	1	1	1	1	1
319	BOTCHWAY JEMIMA ATSWEI	Female	1	1	1	1	1
320	BOTCHWAY MICHAEL	Male	5	3	1	4	2
321	ADDISON EMMANUEL	Male	5	3	1	4	2
322	BOYETEY SOLOMON BUERNOR	Male	5	3	1	4	2
323	BRENYAH SYLVESTER	Male	5	3	1	4	2
324	CLELAND VERA VASTU	Female	1	1	1	1	1
325	ADDISON STEPHEN EBO	Male	5	3	1	4	2
326	DADZIE ISAAC	Male	5	3	1	4	2
327	DAMALIE DEBORAH YAYRA	Female	1	1	1	1	1
328	DARKO MOSES	Male	5	3	1	4	2
329	ADDO NAOMI	Female	1	1	1	1	1
330	DARKOA DORA	Female	1	1	1	1	1
331	DENTAAH AMPOFO PATIENCE O.	Female	1	1	1	1	1
332	DJIDONU DANIEL KWESI	Male	5	3	1	4	2
333	ADDO PATIENCE	Female	1	1	1	1	1
334	DOE KENNEDY	Male	5	3	1	4	2
335	DOKU ESTHER MAKU	Female	1	1	1	1	1
336	DOWUONA PRISCILLA NORKAI	Female	1	1	1	1	1
337	ADDY MELIORA GENEVIEVE	Female	1	1	1	1	1
338	DZRAMADO SANDRA	Female	1	1	1	1	1
339	DZUFLE BRIDGET	Female	1	1	1	1	1
340	EDZEOU BERNARD	Male	5	3	1	4	2
341	ADEKPUITOR PETER	Male	5	3	1	4	2
342	ENTSIEH EVANS	Male	5	3	1	4	2
343	FOMETU GLADYS COURINE	Female	1	1	1	1	1
344	GANYO REBECCA EYRAM	Female	1	1	1	1	1
345	ADEKU CALEB KOJO	Male	5	3	1	4	2
346	GBADGO CHARLOTTE	Female	1	1	1	1	1
347	GODOMEY ABRAHAM	Male	5	3	1	4	2
348	GYAN FELICIA	Female	1	1	1	1	1
349	ADETI CLIFFORD KWABLA	Male	5	3	1	4	2
350	GYAN MANTEY	Male	5	3	1	4	2
351	GYEKYE EMMANUEL	Male	5	3	1	4	2
352	HAGAN EDWIN EBOH	Male	5	3	1	4	2
353	ADINKRAH ABIGAIL	Female	1	1	1	1	1
354	HAMMOND NATHANIEL	Male	5	3	1	4	2
355	IBRAHIM MOHAMMED SANUSI	Male	5	3	1	4	2
356	IBRAHIM SEMIRATU	Female	1	1	1	1	1
357	ADIOK JOSHUA ALLEN	Male	5	3	1	4	2
358	INUSAH MOHAMMED	Male	5	3	1	4	2
359	KABAH ALIAYIRE ALEX	Male	5	3	1	4	2
360	KELVIN NKANSAH	Male	5	3	1	4	2
361	ADJAKLOE FLOSSIE DZIFA	Female	1	1	1	1	1
362	KUDJUH BRIGHT DOSU	Male	5	3	1	4	2
363	KUMI DANIEL DARKO	Male	5	3	1	4	2
364	KUMI MARY POKUAA	Female	1	1	1	1	1
365	ADJASOO LINDA SELINAM	Female	1	1	1	1	1
366	KUSI LYDIA ADJOA ADJEIWAA	Female	1	1	1	1	1
367	KWARTENG JESSE SARPONG	Male	5	3	1	4	2
368	LANTEI- LAMPTEY JESSE NII	Male	5	3	1	4	2
369	ADJEI - BAAH STEPHEN	Male	5	3	1	4	2
370	MASOPEH FELICIA VANILLA NAA AMELEY	Female	1	1	1	1	1
371	MENDS FIDELIA APPIAH	Female	1	1	1	1	1
372	MENSAH BETTY TELUS	Female	1	1	1	1	1
373	ADJEI BELINDA ADJETEY	Female	1	1	1	1	1
374	MENSAH CHARLES GYAMFI	Male	5	3	1	4	2
375	MENSAH PHILOMINA TECHIE	Female	1	1	1	1	1
376	MENYE GODWIN JR	Male	5	3	1	4	2
377	ADJEI DANIEL	Male	5	3	1	4	2
378	MOHAMMED ADAM ZAKIYU	Male	5	3	1	4	2
379	NARTEH GEOFFREY	Male	5	3	1	4	2
380	NKANSAH LOCTUS ADJEI	Female	1	1	1	1	1
381	ADJEI HENRY	Male	5	3	1	4	2
382	NORTEY NICHOLAS	Male	5	3	1	4	2
383	NUAMAH SAMUEL	Male	5	3	1	4	2
384	NUKPE DAVID CONVERY	Male	5	3	1	4	2
385	ADJEI JENNIFER ODUA	Female	1	1	1	1	1
386	NYARKO ANISA	Female	1	1	1	1	1
387	NYARKO NICHOLAS	Male	5	3	1	4	2
388	NYARKO WILLIAM KWABENA	Male	5	3	1	4	2
389	ADJEIBEA RACHEAL	Female	1	1	1	1	1
390	NYEDU ISHMAEL	Male	5	3	1	4	2
391	OBENG JULIANA	Female	1	1	1	1	1
392	OBUOBI SOLOMON	Male	5	3	1	4	2
393	ADJETEY ERAMI NII ADJEI	Male	5	3	1	4	2
394	ODOI ERIC AKO	Male	5	3	1	4	2
395	OFFEI OSEI FRANCIS	Male	5	3	1	4	2
396	OPOKU SAMUEL	Male	5	3	1	4	2
397	ADJIN-TETTEY JEREMIAH	Male	5	3	1	4	2
398	OPOKUA GIFTY NANA AMA	Female	1	1	1	1	1
399	OSEI RICHMOND KOFI	Male	5	3	1	4	2
400	OUEDORAOGO ROGER PETER	Male	5	3	1	4	2
401	ADJOKATSE BERNICE	Female	1	1	1	1	1
402	OWUSU ALEX	Male	5	3	1	4	2
403	OWUSU-APENTENG STEPHEN	Male	5	3	1	4	2
404	PARRY JESSICA	Male	5	3	1	4	2
405	ADOM JENNIFER ESTHER OHENEBA	Female	1	1	1	1	1
406	QUAICOE ENOCH	Male	5	3	1	4	2
407	QUANSAH BELINDA	Female	1	1	1	1	1
408	QUARTEY EVELYN NAA KWARLEY	Female	1	1	1	1	1
409	ADOM KWADWO BOAKYE	Male	5	3	1	4	2
410	QUARTEY SALOMEY	Female	1	1	1	1	1
411	SAHEED AZEEZAT	Female	1	1	1	1	1
412	SHAIBU FAUZIYATU	Female	1	1	1	1	1
413	ADU BONA SUSANNA	Female	1	1	1	1	1
414	SOWAH ALEXANDRA ENYONAM	Female	1	1	1	1	1
415	SULLEY HINDU MUNIRU	Female	1	1	1	1	1
416	TAGOE DAVID	Male	5	3	1	4	2
417	ADU DORA	Female	1	1	1	1	1
418	TAWIAH ADAMA OKOE	Male	5	3	1	4	2
419	TETTEH KELVIN	Male	5	3	1	4	2
420	TETTEH MALVIN	Male	5	3	1	4	2
421	ADU PRISCILLA NKETIA	Female	1	1	1	1	1
422	WADIE LINDA NKANSAH	Female	1	1	1	1	1
423	WENOMA LINDA	Female	1	1	1	1	1
424	YARTEY SEFIATU	Female	1	1	1	1	1
425	ADU-AGYEI AWURA AKUA	Female	1	1	1	1	1
426	OWUSU ALEX	Male	5	3	1	4	2
427	OWUSU-APENTENG STEPHEN	Male	5	3	1	4	2
428	PARRY JESSICA	Male	5	3	1	4	2
429	ADU-TWUM FREDERICK ASANTE	Male	5	3	1	4	2
430	QUAICOE ENOCH	Male	5	3	1	4	2
431	QUANSAH BELINDA	Female	1	1	1	1	1
432	QUARTEY EVELYN NAA KWARLEY	Female	1	1	1	1	1
433	ADUSEI GIFTY YEBOAH	Female	1	1	1	1	1
434	QUARTEY SALOMEY	Female	1	1	1	1	1
435	SAHEED AZEEZAT	Female	1	1	1	1	1
436	SHAIBU FAUZIYATU	Female	1	1	1	1	1
437	ADUUM REBECCA	Female	1	1	1	1	1
438	AFARI STEPHEN	Male	5	3	1	4	2
439	AFOTEY PATRICK DUNYO	Male	5	3	1	4	2
440	AFRAH TRACY NTOW	Female	1	1	1	1	1
441	ABABIO ABEDNEGO A.	Male	5	3	1	4	2
442	ABOAGYE ELIZABETH BOADIWAA	Female	1	1	1	1	1
443	ABOE ANDREWS	Male	5	3	1	4	2
444	ABRAHAM-QUANSAH MARY EVA	Female	1	1	1	1	1
445	ABALEM JENNIFER	Female	1	1	1	1	1
446	ADDAE SANDRA	Female	1	1	1	1	1
447	ADJEI FREDERICK YAW	Male	5	3	1	4	2
448	ADJEI PRINCE BAFFOUR	Male	5	3	1	4	2
449	ABBAN VIDA OWUSU	Female	1	1	1	1	1
450	ADJEI SAMUEL	Male	5	3	1	4	2
451	ADJORLOLO MERCY NORKPLIM	Female	1	1	1	1	1
452	ADOCTOR VICTORIA	Female	1	1	1	1	1
453	ADU AFRIYIE	Male	5	3	1	4	2
454	ADU EMMANUEL	Male	5	3	1	4	2
455	ADZOWU MILLICENT	Female	1	1	1	1	1
456	AFORDE JAMES ABLORDE	Male	5	3	1	4	2
457	ABDALLAH FATIMATU	Female	1	1	1	1	1
458	AGBENYEGA STEPHEN	Male	5	3	1	4	2
459	AGBOGBA LANDRY KWAME	Male	5	3	1	4	2
460	AGGERH BARNABAS KOBBY	Male	5	3	1	4	2
461	ABDULAI FAIZA	Female	1	1	1	1	1
462	AGOE JEHOSHAPHAT SOWAH	Male	5	3	1	4	2
463	AGUDA NARKIE PATRICIA	Female	1	1	1	1	1
464	AGYARE PRISCILLA DARFOUR	Female	1	1	1	1	1
465	ABEKAH EMMANUEL	Male	5	3	1	4	2
466	AGYEI RICHARD KWAME	Male	5	3	1	4	2
467	AGYEMAN DUAH BOATEMAA	Female	1	1	1	1	1
468	AGYEMAN PAUL BOAKYE	Male	5	3	1	4	2
469	ABOAGYE DAVID ADU	Male	5	3	1	4	2
470	AGYIRI GEORGINA	Female	1	1	1	1	1
471	AHIABLEY PORTIA	Female	1	1	1	1	1
472	AHONI MAUDLIN AYONGO	Female	1	1	1	1	1
473	ABOAGYE FELIX	Male	5	3	1	4	2
474	AKAGBO REBECCA	Female	1	1	1	1	1
475	AKOTO REINDOLF APPIAH	Male	5	3	1	4	2
476	AKUFFO GIDEON	Male	5	3	1	4	2
477	ABU ABDUL MANAF	Male	5	3	1	4	2
478	ALAGBO EMMANUEL	Male	5	3	1	4	2
479	ALLOTEY KPAKPO VINCENT	Male	5	3	1	4	2
480	ALLOTEY PEARL NAA AKU	Female	1	1	1	1	1
481	ABUBAKAR ARAFAT SUFYAN	Male	5	3	1	4	2
482	AMAKYE JAMES SARPONG	Male	5	3	1	4	2
483	AMEVOR ERIC	Male	5	3	1	4	2
484	AMOAH CHARLOTTE KORKOR	Female	1	1	1	1	1
485	ACHEAMPONG CHRISTABEL	Female	1	1	1	1	1
486	AMOAH MILDRED	Female	1	1	1	1	1
487	AMOAKO ERNESTINA OPOKUA	Female	1	1	1	1	1
488	AMPONSAH CECILIA ABENA	Female	1	1	1	1	1
489	ACHEAMPONG KINGSLEY	Male	5	3	1	4	2
490	AMUZU STELLA KABUKI	Female	1	1	1	1	1
491	ANABI MUSAH AHMED	Male	5	3	1	4	2
492	ANDERSON GIFTY	Female	1	1	1	1	1
493	ACHEAMPONG MICHAEL APPIAH	Male	5	3	1	4	2
494	ANDERSON VIVIAN	Female	1	1	1	1	1
495	ANKOMAH GEORGINA	Female	1	1	1	1	1
496	ANNANG FRANCISCA TORSHIE	Female	1	1	1	1	1
497	ACQUAH BENJAMIN	Male	5	3	1	4	2
498	ANNOR RICHAEL	Female	1	1	1	1	1
499	ANSAH FAUSTINA	Female	1	1	1	1	1
500	ANSAH MARFO DOREEN	Female	1	1	1	1	1
501	ACQUAH KINGSLEY OCANSEY	Male	5	3	1	4	2
502	ANTHONIO HENRIETTA	Female	1	1	1	1	1
503	APPIAH ISAAC	Male	5	3	1	4	2
504	APPIAH MOSES	Male	5	3	1	4	2
505	ACQUAH PHILIP	Male	5	3	1	4	2
506	APPIAH PRINCE KWESI	Male	5	3	1	4	2
507	ARKO HAGAR	Female	1	1	1	1	1
508	ARKOH GALAHAD AHINSAH	Female	1	1	1	1	1
509	ADAM HALIMATU SADIA	Female	1	1	1	1	1
510	ARTHUR EBENEZER	Male	5	3	1	4	2
511	ARTHUR ESSUMAN JAMES	Male	5	3	1	4	2
512	ARYEETEY MESHACK	Male	5	3	1	4	2
513	ADAMA-TETTEY MARYNSKY	Female	1	1	1	1	1
514	ASABIRE SOPHIA	Female	1	1	1	1	1
515	ASAHENE EMMANUELLA	Female	1	1	1	1	1
516	ASAMANY CARL	Male	5	3	1	4	2
517	ADAMS AFISHETU	Female	1	1	1	1	1
518	ASAMOAH MERCY	Female	1	1	1	1	1
519	ASARE ERIC AGYIRI AWERE	Male	5	3	1	4	2
520	ASHITEY MCZILL HAFIZ OKO	Male	5	3	1	4	2
521	ADAMS ANASS	Male	5	3	1	4	2
522	ASIEDU MAVIS	Female	1	1	1	1	1
523	ATIEMO JOSEPHINE	Female	1	1	1	1	1
524	AWUDER WILLIAM YAO	Male	5	3	1	4	2
525	ADARKWAH IRENE	Female	1	1	1	1	1
526	AYER PERCY OKAI	Male	5	3	1	4	2
527	AYISI BENJAMIN	Male	5	3	1	4	2
528	AZAMETSI MIRABLE	Female	1	1	1	1	1
529	ADDAE PORTIA	Female	1	1	1	1	1
530	BEDIAKO PRISCILLA ODURO	Female	1	1	1	1	1
531	BELLEY BETTY	Female	1	1	1	1	1
532	BOATEMAA SLYVIA	Female	1	1	1	1	1
533	ADDEY AUGUSTINE	Male	5	3	1	4	2
534	BOATENG ABRAHAM AMEGAVIE	Male	5	3	1	4	2
535	BONDZIE SAMUEL AIDOO	Male	5	3	1	4	2
536	BONI MAXWELL EDEM	Male	5	3	1	4	2
537	ADDICO FRANCIS AWULEY	Male	5	3	1	4	2
538	BOTCHWAY HANNAH	Female	1	1	1	1	1
539	BOTCHWAY JEMIMA ATSWEI	Female	1	1	1	1	1
540	BOTCHWAY MICHAEL	Male	5	3	1	4	2
541	ADDISON EMMANUEL	Male	5	3	1	4	2
542	BOYETEY SOLOMON BUERNOR	Male	5	3	1	4	2
543	BRENYAH SYLVESTER	Male	5	3	1	4	2
544	CLELAND VERA VASTU	Female	1	1	1	1	1
545	ADDISON STEPHEN EBO	Male	5	3	1	4	2
546	DADZIE ISAAC	Male	5	3	1	4	2
547	DAMALIE DEBORAH YAYRA	Female	1	1	1	1	1
548	DARKO MOSES	Male	5	3	1	4	2
549	ADDO NAOMI	Female	1	1	1	1	1
550	DARKOA DORA	Female	1	1	1	1	1
551	DENTAAH AMPOFO PATIENCE O.	Female	1	1	1	1	1
552	DJIDONU DANIEL KWESI	Male	5	3	1	4	2
553	ADDO PATIENCE	Female	1	1	1	1	1
554	DOE KENNEDY	Male	5	3	1	4	2
555	DOKU ESTHER MAKU	Female	1	1	1	1	1
556	DOWUONA PRISCILLA NORKAI	Female	1	1	1	1	1
557	ADDY MELIORA GENEVIEVE	Female	1	1	1	1	1
558	DZRAMADO SANDRA	Female	1	1	1	1	1
559	DZUFLE BRIDGET	Female	1	1	1	1	1
560	EDZEOU BERNARD	Male	5	3	1	4	2
561	ADEKPUITOR PETER	Male	5	3	1	4	2
562	ENTSIEH EVANS	Male	5	3	1	4	2
563	FOMETU GLADYS COURINE	Female	1	1	1	1	1
564	GANYO REBECCA EYRAM	Female	1	1	1	1	1
565	ADEKU CALEB KOJO	Male	5	3	1	4	2
566	GBADGO CHARLOTTE	Female	1	1	1	1	1
567	GODOMEY ABRAHAM	Male	5	3	1	4	2
568	GYAN FELICIA	Female	1	1	1	1	1
569	ADETI CLIFFORD KWABLA	Male	5	3	1	4	2
570	GYAN MANTEY	Male	5	3	1	4	2
571	GYEKYE EMMANUEL	Male	5	3	1	4	2
572	HAGAN EDWIN EBOH	Male	5	3	1	4	2
573	ADINKRAH ABIGAIL	Female	1	1	1	1	1
574	HAMMOND NATHANIEL	Male	5	3	1	4	2
575	IBRAHIM MOHAMMED SANUSI	Male	5	3	1	4	2
576	IBRAHIM SEMIRATU	Female	1	1	1	1	1
577	ADIOK JOSHUA ALLEN	Male	5	3	1	4	2
578	INUSAH MOHAMMED	Male	5	3	1	4	2
579	KABAH ALIAYIRE ALEX	Male	5	3	1	4	2
580	KELVIN NKANSAH	Male	5	3	1	4	2
581	ADJAKLOE FLOSSIE DZIFA	Female	1	1	1	1	1
582	KUDJUH BRIGHT DOSU	Male	5	3	1	4	2
583	KUMI DANIEL DARKO	Male	5	3	1	4	2
584	KUMI MARY POKUAA	Female	1	1	1	1	1
585	ADJASOO LINDA SELINAM	Female	1	1	1	1	1
586	KUSI LYDIA ADJOA ADJEIWAA	Female	1	1	1	1	1
587	KWARTENG JESSE SARPONG	Male	5	3	1	4	2
588	LANTEI- LAMPTEY JESSE NII	Male	5	3	1	4	2
589	ADJEI - BAAH STEPHEN	Male	5	3	1	4	2
590	MASOPEH FELICIA VANILLA NAA AMELEY	Female	1	1	1	1	1
591	MENDS FIDELIA APPIAH	Female	1	1	1	1	1
592	MENSAH BETTY TELUS	Female	1	1	1	1	1
593	ADJEI BELINDA ADJETEY	Female	1	1	1	1	1
594	MENSAH CHARLES GYAMFI	Male	5	3	1	4	2
595	MENSAH PHILOMINA TECHIE	Female	1	1	1	1	1
596	MENYE GODWIN JR	Male	5	3	1	4	2
597	ADJEI DANIEL	Male	5	3	1	4	2
598	MOHAMMED ADAM ZAKIYU	Male	5	3	1	4	2
599	NARTEH GEOFFREY	Male	5	3	1	4	2
600	NKANSAH LOCTUS ADJEI	Female	1	1	1	1	1
601	ADJEI HENRY	Male	5	3	1	4	2
602	NORTEY NICHOLAS	Male	5	3	1	4	2
603	NUAMAH SAMUEL	Male	5	3	1	4	2
604	NUKPE DAVID CONVERY	Male	5	3	1	4	2
605	ADJEI JENNIFER ODUA	Female	1	1	1	1	1
606	NYARKO ANISA	Female	1	1	1	1	1
607	NYARKO NICHOLAS	Male	5	3	1	4	2
608	NYARKO WILLIAM KWABENA	Male	5	3	1	4	2
609	ADJEIBEA RACHEAL	Female	1	1	1	1	1
610	NYEDU ISHMAEL	Male	5	3	1	4	2
611	OBENG JULIANA	Female	1	1	1	1	1
612	OBUOBI SOLOMON	Male	5	3	1	4	2
613	ADJETEY ERAMI NII ADJEI	Male	5	3	1	4	2
614	ODOI ERIC AKO	Male	5	3	1	4	2
615	OFFEI OSEI FRANCIS	Male	5	3	1	4	2
616	OPOKU SAMUEL	Male	5	3	1	4	2
617	ADJIN-TETTEY JEREMIAH	Male	5	3	1	4	2
618	OPOKUA GIFTY NANA AMA	Female	1	1	1	1	1
619	OSEI RICHMOND KOFI	Male	5	3	1	4	2
620	OUEDORAOGO ROGER PETER	Male	5	3	1	4	2
621	ADJOKATSE BERNICE	Female	1	1	1	1	1
622	OWUSU ALEX	Male	5	3	1	4	2
623	OWUSU-APENTENG STEPHEN	Male	5	3	1	4	2
624	PARRY JESSICA	Male	5	3	1	4	2
625	ADOM JENNIFER ESTHER OHENEBA	Female	1	1	1	1	1
626	QUAICOE ENOCH	Male	5	3	1	4	2
627	QUANSAH BELINDA	Female	1	1	1	1	1
628	QUARTEY EVELYN NAA KWARLEY	Female	1	1	1	1	1
629	ADOM KWADWO BOAKYE	Male	5	3	1	4	2
630	QUARTEY SALOMEY	Female	1	1	1	1	1
631	SAHEED AZEEZAT	Female	1	1	1	1	1
632	SHAIBU FAUZIYATU	Female	1	1	1	1	1
633	ADU BONA SUSANNA	Female	1	1	1	1	1
634	SOWAH ALEXANDRA ENYONAM	Female	1	1	1	1	1
635	SULLEY HINDU MUNIRU	Female	1	1	1	1	1
636	TAGOE DAVID	Male	5	3	1	4	2
637	ADU DORA	Female	1	1	1	1	1
638	TAWIAH ADAMA OKOE	Male	5	3	1	4	2
639	TETTEH KELVIN	Male	5	3	1	4	2
640	TETTEH MALVIN	Male	5	3	1	4	2
641	ADU PRISCILLA NKETIA	Female	1	1	1	1	1
642	WADIE LINDA NKANSAH	Female	1	1	1	1	1
643	WENOMA LINDA	Female	1	1	1	1	1
644	YARTEY SEFIATU	Female	1	1	1	1	1
645	ADU-AGYEI AWURA AKUA	Female	1	1	1	1	1
646	OWUSU ALEX	Male	5	3	1	4	2
647	OWUSU-APENTENG STEPHEN	Male	5	3	1	4	2
648	PARRY JESSICA	Male	5	3	1	4	2
649	ADU-TWUM FREDERICK ASANTE	Male	5	3	1	4	2
650	QUAICOE ENOCH	Male	5	3	1	4	2
651	QUANSAH BELINDA	Female	1	1	1	1	1
652	QUARTEY EVELYN NAA KWARLEY	Female	1	1	1	1	1
653	ADUSEI GIFTY YEBOAH	Female	1	1	1	1	1
654	QUARTEY SALOMEY	Female	1	1	1	1	1
655	SAHEED AZEEZAT	Female	1	1	1	1	1
656	SHAIBU FAUZIYATU	Female	1	1	1	1	1
657	ADUUM REBECCA	Female	1	1	1	1	1
658	AFARI STEPHEN	Male	5	3	1	4	2
659	AFOTEY PATRICK DUNYO	Male	5	3	1	4	2
660	AFRAH TRACY NTOW	Female	1	1	1	1	1
661	ABABIO ABEDNEGO A.	Male	5	3	1	4	2
662	ABOAGYE ELIZABETH BOADIWAA	Female	1	1	1	1	1
663	ABOE ANDREWS	Male	5	3	1	4	2
664	ABRAHAM-QUANSAH MARY EVA	Female	1	1	1	1	1
665	ABALEM JENNIFER	Female	1	1	1	1	1
666	ADDAE SANDRA	Female	1	1	1	1	1
667	ADJEI FREDERICK YAW	Male	5	3	1	4	2
668	ADJEI PRINCE BAFFOUR	Male	5	3	1	4	2
669	ABBAN VIDA OWUSU	Female	1	1	1	1	1
670	ADJEI SAMUEL	Male	5	3	1	4	2
671	ADJORLOLO MERCY NORKPLIM	Female	1	1	1	1	1
672	ADOCTOR VICTORIA	Female	1	1	1	1	1
673	ADU AFRIYIE	Male	5	3	1	4	2
674	ADU EMMANUEL	Male	5	3	1	4	2
675	ADZOWU MILLICENT	Female	1	1	1	1	1
676	AFORDE JAMES ABLORDE	Male	5	3	1	4	2
677	ABDALLAH FATIMATU	Female	1	1	1	1	1
678	AGBENYEGA STEPHEN	Male	5	3	1	4	2
679	AGBOGBA LANDRY KWAME	Male	5	3	1	4	2
680	AGGERH BARNABAS KOBBY	Male	5	3	1	4	2
681	ABDULAI FAIZA	Female	1	1	1	1	1
682	AGOE JEHOSHAPHAT SOWAH	Male	5	3	1	4	2
683	AGUDA NARKIE PATRICIA	Female	1	1	1	1	1
684	AGYARE PRISCILLA DARFOUR	Female	1	1	1	1	1
685	ABEKAH EMMANUEL	Male	5	3	1	4	2
686	AGYEI RICHARD KWAME	Male	5	3	1	4	2
687	AGYEMAN DUAH BOATEMAA	Female	1	1	1	1	1
688	AGYEMAN PAUL BOAKYE	Male	5	3	1	4	2
689	ABOAGYE DAVID ADU	Male	5	3	1	4	2
690	AGYIRI GEORGINA	Female	1	1	1	1	1
691	AHIABLEY PORTIA	Female	1	1	1	1	1
692	AHONI MAUDLIN AYONGO	Female	1	1	1	1	1
693	ABOAGYE FELIX	Male	5	3	1	4	2
694	AKAGBO REBECCA	Female	1	1	1	1	1
695	AKOTO REINDOLF APPIAH	Male	5	3	1	4	2
696	AKUFFO GIDEON	Male	5	3	1	4	2
697	ABU ABDUL MANAF	Male	5	3	1	4	2
698	ALAGBO EMMANUEL	Male	5	3	1	4	2
699	ALLOTEY KPAKPO VINCENT	Male	5	3	1	4	2
700	ALLOTEY PEARL NAA AKU	Female	1	1	1	1	1
701	ABUBAKAR ARAFAT SUFYAN	Male	5	3	1	4	2
702	AMAKYE JAMES SARPONG	Male	5	3	1	4	2
703	AMEVOR ERIC	Male	5	3	1	4	2
704	AMOAH CHARLOTTE KORKOR	Female	1	1	1	1	1
705	ACHEAMPONG CHRISTABEL	Female	1	1	1	1	1
706	AMOAH MILDRED	Female	1	1	1	1	1
707	AMOAKO ERNESTINA OPOKUA	Female	1	1	1	1	1
708	AMPONSAH CECILIA ABENA	Female	1	1	1	1	1
709	ACHEAMPONG KINGSLEY	Male	5	3	1	4	2
710	AMUZU STELLA KABUKI	Female	1	1	1	1	1
711	ANABI MUSAH AHMED	Male	5	3	1	4	2
712	ANDERSON GIFTY	Female	1	1	1	1	1
713	ACHEAMPONG MICHAEL APPIAH	Male	5	3	1	4	2
714	ANDERSON VIVIAN	Female	1	1	1	1	1
715	ANKOMAH GEORGINA	Female	1	1	1	1	1
716	ANNANG FRANCISCA TORSHIE	Female	1	1	1	1	1
717	ACQUAH BENJAMIN	Male	5	3	1	4	2
718	ANNOR RICHAEL	Female	1	1	1	1	1
719	ANSAH FAUSTINA	Female	1	1	1	1	1
720	ANSAH MARFO DOREEN	Female	1	1	1	1	1
721	ACQUAH KINGSLEY OCANSEY	Male	5	3	1	4	2
722	ANTHONIO HENRIETTA	Female	1	1	1	1	1
723	APPIAH ISAAC	Male	5	3	1	4	2
724	APPIAH MOSES	Male	5	3	1	4	2
725	ACQUAH PHILIP	Male	5	3	1	4	2
726	APPIAH PRINCE KWESI	Male	5	3	1	4	2
727	ARKO HAGAR	Female	1	1	1	1	1
728	ARKOH GALAHAD AHINSAH	Female	1	1	1	1	1
729	ADAM HALIMATU SADIA	Female	1	1	1	1	1
730	ARTHUR EBENEZER	Male	5	3	1	4	2
731	ARTHUR ESSUMAN JAMES	Male	5	3	1	4	2
732	ARYEETEY MESHACK	Male	5	3	1	4	2
733	ADAMA-TETTEY MARYNSKY	Female	1	1	1	1	1
734	ASABIRE SOPHIA	Female	1	1	1	1	1
735	ASAHENE EMMANUELLA	Female	1	1	1	1	1
736	ASAMANY CARL	Male	5	3	1	4	2
737	ADAMS AFISHETU	Female	1	1	1	1	1
738	ASAMOAH MERCY	Female	1	1	1	1	1
739	ASARE ERIC AGYIRI AWERE	Male	5	3	1	4	2
740	ASHITEY MCZILL HAFIZ OKO	Male	5	3	1	4	2
741	ADAMS ANASS	Male	5	3	1	4	2
742	ASIEDU MAVIS	Female	1	1	1	1	1
743	ATIEMO JOSEPHINE	Female	1	1	1	1	1
744	AWUDER WILLIAM YAO	Male	5	3	1	4	2
745	ADARKWAH IRENE	Female	1	1	1	1	1
746	AYER PERCY OKAI	Male	5	3	1	4	2
747	AYISI BENJAMIN	Male	5	3	1	4	2
748	AZAMETSI MIRABLE	Female	1	1	1	1	1
749	ADDAE PORTIA	Female	1	1	1	1	1
750	BEDIAKO PRISCILLA ODURO	Female	1	1	1	1	1
751	BELLEY BETTY	Female	1	1	1	1	1
752	BOATEMAA SLYVIA	Female	1	1	1	1	1
753	ADDEY AUGUSTINE	Male	5	3	1	4	2
754	BOATENG ABRAHAM AMEGAVIE	Male	5	3	1	4	2
755	BONDZIE SAMUEL AIDOO	Male	5	3	1	4	2
756	BONI MAXWELL EDEM	Male	5	3	1	4	2
757	ADDICO FRANCIS AWULEY	Male	5	3	1	4	2
758	BOTCHWAY HANNAH	Female	1	1	1	1	1
759	BOTCHWAY JEMIMA ATSWEI	Female	1	1	1	1	1
760	BOTCHWAY MICHAEL	Male	5	3	1	4	2
761	ADDISON EMMANUEL	Male	5	3	1	4	2
762	BOYETEY SOLOMON BUERNOR	Male	5	3	1	4	2
763	BRENYAH SYLVESTER	Male	5	3	1	4	2
764	CLELAND VERA VASTU	Female	1	1	1	1	1
765	ADDISON STEPHEN EBO	Male	5	3	1	4	2
766	DADZIE ISAAC	Male	5	3	1	4	2
767	DAMALIE DEBORAH YAYRA	Female	1	1	1	1	1
768	DARKO MOSES	Male	5	3	1	4	2
769	ADDO NAOMI	Female	1	1	1	1	1
770	DARKOA DORA	Female	1	1	1	1	1
771	DENTAAH AMPOFO PATIENCE O.	Female	1	1	1	1	1
772	DJIDONU DANIEL KWESI	Male	5	3	1	4	2
773	ADDO PATIENCE	Female	1	1	1	1	1
774	DOE KENNEDY	Male	5	3	1	4	2
775	DOKU ESTHER MAKU	Female	1	1	1	1	1
776	DOWUONA PRISCILLA NORKAI	Female	1	1	1	1	1
777	ADDY MELIORA GENEVIEVE	Female	1	1	1	1	1
778	DZRAMADO SANDRA	Female	1	1	1	1	1
779	DZUFLE BRIDGET	Female	1	1	1	1	1
780	EDZEOU BERNARD	Male	5	3	1	4	2
781	ADEKPUITOR PETER	Male	5	3	1	4	2
782	ENTSIEH EVANS	Male	5	3	1	4	2
783	FOMETU GLADYS COURINE	Female	1	1	1	1	1
784	GANYO REBECCA EYRAM	Female	1	1	1	1	1
785	ADEKU CALEB KOJO	Male	5	3	1	4	2
786	GBADGO CHARLOTTE	Female	1	1	1	1	1
787	GODOMEY ABRAHAM	Male	5	3	1	4	2
788	GYAN FELICIA	Female	1	1	1	1	1
789	ADETI CLIFFORD KWABLA	Male	5	3	1	4	2
790	GYAN MANTEY	Male	5	3	1	4	2
791	GYEKYE EMMANUEL	Male	5	3	1	4	2
792	HAGAN EDWIN EBOH	Male	5	3	1	4	2
793	ADINKRAH ABIGAIL	Female	1	1	1	1	1
794	HAMMOND NATHANIEL	Male	5	3	1	4	2
795	IBRAHIM MOHAMMED SANUSI	Male	5	3	1	4	2
796	IBRAHIM SEMIRATU	Female	1	1	1	1	1
797	ADIOK JOSHUA ALLEN	Male	5	3	1	4	2
798	INUSAH MOHAMMED	Male	5	3	1	4	2
799	KABAH ALIAYIRE ALEX	Male	5	3	1	4	2
800	KELVIN NKANSAH	Male	5	3	1	4	2
801	ADJAKLOE FLOSSIE DZIFA	Female	1	1	1	1	1
802	KUDJUH BRIGHT DOSU	Male	5	3	1	4	2
803	KUMI DANIEL DARKO	Male	5	3	1	4	2
804	KUMI MARY POKUAA	Female	1	1	1	1	1
805	ADJASOO LINDA SELINAM	Female	1	1	1	1	1
806	KUSI LYDIA ADJOA ADJEIWAA	Female	1	1	1	1	1
807	KWARTENG JESSE SARPONG	Male	5	3	1	4	2
808	LANTEI- LAMPTEY JESSE NII	Male	5	3	1	4	2
809	ADJEI - BAAH STEPHEN	Male	5	3	1	4	2
810	MASOPEH FELICIA VANILLA NAA AMELEY	Female	1	1	1	1	1
811	MENDS FIDELIA APPIAH	Female	1	1	1	1	1
812	MENSAH BETTY TELUS	Female	1	1	1	1	1
813	ADJEI BELINDA ADJETEY	Female	1	1	1	1	1
814	MENSAH CHARLES GYAMFI	Male	5	3	1	4	2
815	MENSAH PHILOMINA TECHIE	Female	1	1	1	1	1
816	MENYE GODWIN JR	Male	5	3	1	4	2
817	ADJEI DANIEL	Male	5	3	1	4	2
818	MOHAMMED ADAM ZAKIYU	Male	5	3	1	4	2
819	NARTEH GEOFFREY	Male	5	3	1	4	2
820	NKANSAH LOCTUS ADJEI	Female	1	1	1	1	1
821	ADJEI HENRY	Male	5	3	1	4	2
822	NORTEY NICHOLAS	Male	5	3	1	4	2
823	NUAMAH SAMUEL	Male	5	3	1	4	2
824	NUKPE DAVID CONVERY	Male	5	3	1	4	2
825	ADJEI JENNIFER ODUA	Female	1	1	1	1	1
826	NYARKO ANISA	Female	1	1	1	1	1
827	NYARKO NICHOLAS	Male	5	3	1	4	2
828	NYARKO WILLIAM KWABENA	Male	5	3	1	4	2
829	ADJEIBEA RACHEAL	Female	1	1	1	1	1
830	NYEDU ISHMAEL	Male	5	3	1	4	2
831	OBENG JULIANA	Female	1	1	1	1	1
832	OBUOBI SOLOMON	Male	5	3	1	4	2
833	ADJETEY ERAMI NII ADJEI	Male	5	3	1	4	2
834	ODOI ERIC AKO	Male	5	3	1	4	2
835	OFFEI OSEI FRANCIS	Male	5	3	1	4	2
836	OPOKU SAMUEL	Male	5	3	1	4	2
837	ADJIN-TETTEY JEREMIAH	Male	5	3	1	4	2
838	OPOKUA GIFTY NANA AMA	Female	1	1	1	1	1
839	OSEI RICHMOND KOFI	Male	5	3	1	4	2
840	OUEDORAOGO ROGER PETER	Male	5	3	1	4	2
841	ADJOKATSE BERNICE	Female	1	1	1	1	1
842	OWUSU ALEX	Male	5	3	1	4	2
843	OWUSU-APENTENG STEPHEN	Male	5	3	1	4	2
844	PARRY JESSICA	Male	5	3	1	4	2
845	ADOM JENNIFER ESTHER OHENEBA	Female	1	1	1	1	1
846	QUAICOE ENOCH	Male	5	3	1	4	2
847	QUANSAH BELINDA	Female	1	1	1	1	1
848	QUARTEY EVELYN NAA KWARLEY	Female	1	1	1	1	1
849	ADOM KWADWO BOAKYE	Male	5	3	1	4	2
850	QUARTEY SALOMEY	Female	1	1	1	1	1
851	SAHEED AZEEZAT	Female	1	1	1	1	1
852	SHAIBU FAUZIYATU	Female	1	1	1	1	1
853	ADU BONA SUSANNA	Female	1	1	1	1	1
854	SOWAH ALEXANDRA ENYONAM	Female	1	1	1	1	1
855	SULLEY HINDU MUNIRU	Female	1	1	1	1	1
856	TAGOE DAVID	Male	5	3	1	4	2
857	ADU DORA	Female	1	1	1	1	1
858	TAWIAH ADAMA OKOE	Male	5	3	1	4	2
859	TETTEH KELVIN	Male	5	3	1	4	2
860	TETTEH MALVIN	Male	5	3	1	4	2
861	ADU PRISCILLA NKETIA	Female	1	1	1	1	1
862	WADIE LINDA NKANSAH	Female	1	1	1	1	1
863	WENOMA LINDA	Female	1	1	1	1	1
864	YARTEY SEFIATU	Female	1	1	1	1	1
865	ADU-AGYEI AWURA AKUA	Female	1	1	1	1	1
866	OWUSU ALEX	Male	5	3	1	4	2
867	OWUSU-APENTENG STEPHEN	Male	5	3	1	4	2
868	PARRY JESSICA	Male	5	3	1	4	2
869	ADU-TWUM FREDERICK ASANTE	Male	5	3	1	4	2
870	QUAICOE ENOCH	Male	5	3	1	4	2
871	QUANSAH BELINDA	Female	1	1	1	1	1
872	QUARTEY EVELYN NAA KWARLEY	Female	1	1	1	1	1
873	ADUSEI GIFTY YEBOAH	Female	1	1	1	1	1
874	QUARTEY SALOMEY	Female	1	1	1	1	1
875	SAHEED AZEEZAT	Female	1	1	1	1	1
876	SHAIBU FAUZIYATU	Female	1	1	1	1	1
877	ADUUM REBECCA	Female	1	1	1	1	1
878	AFARI STEPHEN	Male	5	3	1	4	2
879	AFOTEY PATRICK DUNYO	Male	5	3	1	4	2
880	AFRAH TRACY NTOW	Female	1	1	1	1	1
881	ABABIO ABEDNEGO A.	Male	5	3	1	4	2
882	ABOAGYE ELIZABETH BOADIWAA	Female	1	1	1	1	1
883	ABOE ANDREWS	Male	5	3	1	4	2
884	ABRAHAM-QUANSAH MARY EVA	Female	1	1	1	1	1
885	ABALEM JENNIFER	Female	1	1	1	1	1
886	ADDAE SANDRA	Female	1	1	1	1	1
887	ADJEI FREDERICK YAW	Male	5	3	1	4	2
888	ADJEI PRINCE BAFFOUR	Male	5	3	1	4	2
889	ABBAN VIDA OWUSU	Female	1	1	1	1	1
890	ADJEI SAMUEL	Male	5	3	1	4	2
891	ADJORLOLO MERCY NORKPLIM	Female	1	1	1	1	1
892	ADOCTOR VICTORIA	Female	1	1	1	1	1
893	ADU AFRIYIE	Male	5	3	1	4	2
894	ADU EMMANUEL	Male	5	3	1	4	2
895	ADZOWU MILLICENT	Female	1	1	1	1	1
896	AFORDE JAMES ABLORDE	Male	5	3	1	4	2
897	ABDALLAH FATIMATU	Female	1	1	1	1	1
898	AGBENYEGA STEPHEN	Male	5	3	1	4	2
899	AGBOGBA LANDRY KWAME	Male	5	3	1	4	2
900	AGGERH BARNABAS KOBBY	Male	5	3	1	4	2
901	ABDULAI FAIZA	Female	1	1	1	1	1
902	AGOE JEHOSHAPHAT SOWAH	Male	5	3	1	4	2
903	AGUDA NARKIE PATRICIA	Female	1	1	1	1	1
904	AGYARE PRISCILLA DARFOUR	Female	1	1	1	1	1
905	ABEKAH EMMANUEL	Male	5	3	1	4	2
906	AGYEI RICHARD KWAME	Male	5	3	1	4	2
907	AGYEMAN DUAH BOATEMAA	Female	1	1	1	1	1
908	AGYEMAN PAUL BOAKYE	Male	5	3	1	4	2
909	ABOAGYE DAVID ADU	Male	5	3	1	4	2
910	AGYIRI GEORGINA	Female	1	1	1	1	1
911	AHIABLEY PORTIA	Female	1	1	1	1	1
912	AHONI MAUDLIN AYONGO	Female	1	1	1	1	1
913	ABOAGYE FELIX	Male	5	3	1	4	2
914	AKAGBO REBECCA	Female	1	1	1	1	1
915	AKOTO REINDOLF APPIAH	Male	5	3	1	4	2
916	AKUFFO GIDEON	Male	5	3	1	4	2
917	ABU ABDUL MANAF	Male	5	3	1	4	2
918	ALAGBO EMMANUEL	Male	5	3	1	4	2
919	ALLOTEY KPAKPO VINCENT	Male	5	3	1	4	2
920	ALLOTEY PEARL NAA AKU	Female	1	1	1	1	1
921	ABUBAKAR ARAFAT SUFYAN	Male	5	3	1	4	2
922	AMAKYE JAMES SARPONG	Male	5	3	1	4	2
923	AMEVOR ERIC	Male	5	3	1	4	2
924	AMOAH CHARLOTTE KORKOR	Female	1	1	1	1	1
925	ACHEAMPONG CHRISTABEL	Female	1	1	1	1	1
926	AMOAH MILDRED	Female	1	1	1	1	1
927	AMOAKO ERNESTINA OPOKUA	Female	1	1	1	1	1
928	AMPONSAH CECILIA ABENA	Female	1	1	1	1	1
929	ACHEAMPONG KINGSLEY	Male	5	3	1	4	2
930	AMUZU STELLA KABUKI	Female	1	1	1	1	1
931	ANABI MUSAH AHMED	Male	5	3	1	4	2
932	ANDERSON GIFTY	Female	1	1	1	1	1
933	ACHEAMPONG MICHAEL APPIAH	Male	5	3	1	4	2
934	ANDERSON VIVIAN	Female	1	1	1	1	1
935	ANKOMAH GEORGINA	Female	1	1	1	1	1
936	ANNANG FRANCISCA TORSHIE	Female	1	1	1	1	1
937	ACQUAH BENJAMIN	Male	5	3	1	4	2
938	ANNOR RICHAEL	Female	1	1	1	1	1
939	ANSAH FAUSTINA	Female	1	1	1	1	1
940	ANSAH MARFO DOREEN	Female	1	1	1	1	1
941	ACQUAH KINGSLEY OCANSEY	Male	5	3	1	4	2
942	ANTHONIO HENRIETTA	Female	1	1	1	1	1
943	APPIAH ISAAC	Male	5	3	1	4	2
944	APPIAH MOSES	Male	5	3	1	4	2
945	ACQUAH PHILIP	Male	5	3	1	4	2
946	APPIAH PRINCE KWESI	Male	5	3	1	4	2
947	ARKO HAGAR	Female	1	1	1	1	1
948	ARKOH GALAHAD AHINSAH	Female	1	1	1	1	1
949	ADAM HALIMATU SADIA	Female	1	1	1	1	1
950	ARTHUR EBENEZER	Male	5	3	1	4	2
951	ARTHUR ESSUMAN JAMES	Male	5	3	1	4	2
952	ARYEETEY MESHACK	Male	5	3	1	4	2
953	ADAMA-TETTEY MARYNSKY	Female	1	1	1	1	1
954	ASABIRE SOPHIA	Female	1	1	1	1	1
955	ASAHENE EMMANUELLA	Female	1	1	1	1	1
956	ASAMANY CARL	Male	5	3	1	4	2
957	ADAMS AFISHETU	Female	1	1	1	1	1
958	ASAMOAH MERCY	Female	1	1	1	1	1
959	ASARE ERIC AGYIRI AWERE	Male	5	3	1	4	2
960	ASHITEY MCZILL HAFIZ OKO	Male	5	3	1	4	2
961	ADAMS ANASS	Male	5	3	1	4	2
962	ASIEDU MAVIS	Female	1	1	1	1	1
963	ATIEMO JOSEPHINE	Female	1	1	1	1	1
964	AWUDER WILLIAM YAO	Male	5	3	1	4	2
965	ADARKWAH IRENE	Female	1	1	1	1	1
966	AYER PERCY OKAI	Male	5	3	1	4	2
967	AYISI BENJAMIN	Male	5	3	1	4	2
968	AZAMETSI MIRABLE	Female	1	1	1	1	1
969	ADDAE PORTIA	Female	1	1	1	1	1
970	BEDIAKO PRISCILLA ODURO	Female	1	1	1	1	1
971	BELLEY BETTY	Female	1	1	1	1	1
972	BOATEMAA SLYVIA	Female	1	1	1	1	1
973	ADDEY AUGUSTINE	Male	5	3	1	4	2
974	BOATENG ABRAHAM AMEGAVIE	Male	5	3	1	4	2
975	BONDZIE SAMUEL AIDOO	Male	5	3	1	4	2
976	BONI MAXWELL EDEM	Male	5	3	1	4	2
977	ADDICO FRANCIS AWULEY	Male	5	3	1	4	2
978	BOTCHWAY HANNAH	Female	1	1	1	1	1
979	BOTCHWAY JEMIMA ATSWEI	Female	1	1	1	1	1
980	BOTCHWAY MICHAEL	Male	5	3	1	4	2
981	ADDISON EMMANUEL	Male	5	3	1	4	2
982	BOYETEY SOLOMON BUERNOR	Male	5	3	1	4	2
983	BRENYAH SYLVESTER	Male	5	3	1	4	2
984	CLELAND VERA VASTU	Female	1	1	1	1	1
985	ADDISON STEPHEN EBO	Male	5	3	1	4	2
986	DADZIE ISAAC	Male	5	3	1	4	2
987	DAMALIE DEBORAH YAYRA	Female	1	1	1	1	1
988	DARKO MOSES	Male	5	3	1	4	2
989	ADDO NAOMI	Female	1	1	1	1	1
990	DARKOA DORA	Female	1	1	1	1	1
991	DENTAAH AMPOFO PATIENCE O.	Female	1	1	1	1	1
992	DJIDONU DANIEL KWESI	Male	5	3	1	4	2
993	ADDO PATIENCE	Female	1	1	1	1	1
994	DOE KENNEDY	Male	5	3	1	4	2
995	DOKU ESTHER MAKU	Female	1	1	1	1	1
996	DOWUONA PRISCILLA NORKAI	Female	1	1	1	1	1
997	ADDY MELIORA GENEVIEVE	Female	1	1	1	1	1
998	DZRAMADO SANDRA	Female	1	1	1	1	1
999	DZUFLE BRIDGET	Female	1	1	1	1	1
1000	EDZEOU BERNARD	Male	5	3	1	4	2
1001	ADEKPUITOR PETER	Male	5	3	1	4	2
1002	ENTSIEH EVANS	Male	5	3	1	4	2
1003	FOMETU GLADYS COURINE	Female	1	1	1	1	1
1004	GANYO REBECCA EYRAM	Female	1	1	1	1	1
1005	ADEKU CALEB KOJO	Male	5	3	1	4	2
1006	GBADGO CHARLOTTE	Female	1	1	1	1	1
1007	GODOMEY ABRAHAM	Male	5	3	1	4	2
1008	GYAN FELICIA	Female	1	1	1	1	1
1009	ADETI CLIFFORD KWABLA	Male	5	3	1	4	2
1010	GYAN MANTEY	Male	5	3	1	4	2
1011	GYEKYE EMMANUEL	Male	5	3	1	4	2
1012	HAGAN EDWIN EBOH	Male	5	3	1	4	2
1013	ADINKRAH ABIGAIL	Female	1	1	1	1	1
1014	HAMMOND NATHANIEL	Male	5	3	1	4	2
1015	IBRAHIM MOHAMMED SANUSI	Male	5	3	1	4	2
1016	IBRAHIM SEMIRATU	Female	1	1	1	1	1
1017	ADIOK JOSHUA ALLEN	Male	5	3	1	4	2
1018	INUSAH MOHAMMED	Male	5	3	1	4	2
1019	KABAH ALIAYIRE ALEX	Male	5	3	1	4	2
1020	KELVIN NKANSAH	Male	5	3	1	4	2
1021	ADJAKLOE FLOSSIE DZIFA	Female	1	1	1	1	1
1022	KUDJUH BRIGHT DOSU	Male	5	3	1	4	2
1023	KUMI DANIEL DARKO	Male	5	3	1	4	2
1024	KUMI MARY POKUAA	Female	1	1	1	1	1
1025	ADJASOO LINDA SELINAM	Female	1	1	1	1	1
1026	KUSI LYDIA ADJOA ADJEIWAA	Female	1	1	1	1	1
1027	KWARTENG JESSE SARPONG	Male	5	3	1	4	2
1028	LANTEI- LAMPTEY JESSE NII	Male	5	3	1	4	2
1029	ADJEI - BAAH STEPHEN	Male	5	3	1	4	2
1030	MASOPEH FELICIA VANILLA NAA AMELEY	Female	1	1	1	1	1
1031	MENDS FIDELIA APPIAH	Female	1	1	1	1	1
1032	MENSAH BETTY TELUS	Female	1	1	1	1	1
1033	ADJEI BELINDA ADJETEY	Female	1	1	1	1	1
1034	MENSAH CHARLES GYAMFI	Male	5	3	1	4	2
1035	MENSAH PHILOMINA TECHIE	Female	1	1	1	1	1
1036	MENYE GODWIN JR	Male	5	3	1	4	2
1037	ADJEI DANIEL	Male	5	3	1	4	2
1038	MOHAMMED ADAM ZAKIYU	Male	5	3	1	4	2
1039	NARTEH GEOFFREY	Male	5	3	1	4	2
1040	NKANSAH LOCTUS ADJEI	Female	1	1	1	1	1
1041	ADJEI HENRY	Male	5	3	1	4	2
1042	NORTEY NICHOLAS	Male	5	3	1	4	2
1043	NUAMAH SAMUEL	Male	5	3	1	4	2
1044	NUKPE DAVID CONVERY	Male	5	3	1	4	2
1045	ADJEI JENNIFER ODUA	Female	1	1	1	1	1
1046	NYARKO ANISA	Female	1	1	1	1	1
1047	NYARKO NICHOLAS	Male	5	3	1	4	2
1048	NYARKO WILLIAM KWABENA	Male	5	3	1	4	2
1049	ADJEIBEA RACHEAL	Female	1	1	1	1	1
1050	NYEDU ISHMAEL	Male	5	3	1	4	2
1051	OBENG JULIANA	Female	1	1	1	1	1
1052	OBUOBI SOLOMON	Male	5	3	1	4	2
1053	ADJETEY ERAMI NII ADJEI	Male	5	3	1	4	2
1054	ODOI ERIC AKO	Male	5	3	1	4	2
1055	OFFEI OSEI FRANCIS	Male	5	3	1	4	2
1056	OPOKU SAMUEL	Male	5	3	1	4	2
1057	ADJIN-TETTEY JEREMIAH	Male	5	3	1	4	2
1058	OPOKUA GIFTY NANA AMA	Female	1	1	1	1	1
1059	OSEI RICHMOND KOFI	Male	5	3	1	4	2
1060	OUEDORAOGO ROGER PETER	Male	5	3	1	4	2
1061	ADJOKATSE BERNICE	Female	1	1	1	1	1
1062	OWUSU ALEX	Male	5	3	1	4	2
1063	OWUSU-APENTENG STEPHEN	Male	5	3	1	4	2
1064	PARRY JESSICA	Male	5	3	1	4	2
1065	ADOM JENNIFER ESTHER OHENEBA	Female	1	1	1	1	1
1066	QUAICOE ENOCH	Male	5	3	1	4	2
1067	QUANSAH BELINDA	Female	1	1	1	1	1
1068	QUARTEY EVELYN NAA KWARLEY	Female	1	1	1	1	1
1069	ADOM KWADWO BOAKYE	Male	5	3	1	4	2
1070	QUARTEY SALOMEY	Female	1	1	1	1	1
1071	SAHEED AZEEZAT	Female	1	1	1	1	1
1072	SHAIBU FAUZIYATU	Female	1	1	1	1	1
1073	ADU BONA SUSANNA	Female	1	1	1	1	1
1074	SOWAH ALEXANDRA ENYONAM	Female	1	1	1	1	1
1075	SULLEY HINDU MUNIRU	Female	1	1	1	1	1
1076	TAGOE DAVID	Male	5	3	1	4	2
1077	ADU DORA	Female	1	1	1	1	1
1078	TAWIAH ADAMA OKOE	Male	5	3	1	4	2
1079	TETTEH KELVIN	Male	5	3	1	4	2
1080	TETTEH MALVIN	Male	5	3	1	4	2
1081	ADU PRISCILLA NKETIA	Female	1	1	1	1	1
1082	WADIE LINDA NKANSAH	Female	1	1	1	1	1
1083	WENOMA LINDA	Female	1	1	1	1	1
1084	YARTEY SEFIATU	Female	1	1	1	1	1
1085	ADU-AGYEI AWURA AKUA	Female	1	1	1	1	1
1086	OWUSU ALEX	Male	5	3	1	4	2
1087	OWUSU-APENTENG STEPHEN	Male	5	3	1	4	2
1088	PARRY JESSICA	Male	5	3	1	4	2
1089	ADU-TWUM FREDERICK ASANTE	Male	5	3	1	4	2
1090	QUAICOE ENOCH	Male	5	3	1	4	2
1091	QUANSAH BELINDA	Female	1	1	1	1	1
1092	QUARTEY EVELYN NAA KWARLEY	Female	1	1	1	1	1
1093	ADUSEI GIFTY YEBOAH	Female	1	1	1	1	1
1094	QUARTEY SALOMEY	Female	1	1	1	1	1
1095	SAHEED AZEEZAT	Female	1	1	1	1	1
1096	SHAIBU FAUZIYATU	Female	1	1	1	1	1
1097	ADUUM REBECCA	Female	1	1	1	1	1
1098	AFARI STEPHEN	Male	5	3	1	4	2
1099	AFOTEY PATRICK DUNYO	Male	5	3	1	4	2
1100	AFRAH TRACY NTOW	Female	1	1	1	1	1
1101	ABABIO ABEDNEGO A.	Male	5	3	1	4	2
1102	ABOAGYE ELIZABETH BOADIWAA	Female	1	1	1	1	1
1103	ABOE ANDREWS	Male	5	3	1	4	2
1104	ABRAHAM-QUANSAH MARY EVA	Female	1	1	1	1	1
1105	ABALEM JENNIFER	Female	1	1	1	1	1
1106	ADDAE SANDRA	Female	1	1	1	1	1
1107	ADJEI FREDERICK YAW	Male	5	3	1	4	2
1108	ADJEI PRINCE BAFFOUR	Male	5	3	1	4	2
1109	ABBAN VIDA OWUSU	Female	1	1	1	1	1
1110	ADJEI SAMUEL	Male	5	3	1	4	2
1111	ADJORLOLO MERCY NORKPLIM	Female	1	1	1	1	1
1112	ADOCTOR VICTORIA	Female	1	1	1	1	1
1113	ADU AFRIYIE	Male	5	3	1	4	2
1114	ADU EMMANUEL	Male	5	3	1	4	2
1115	ADZOWU MILLICENT	Female	1	1	1	1	1
1116	AFORDE JAMES ABLORDE	Male	5	3	1	4	2
1117	ABDALLAH FATIMATU	Female	1	1	1	1	1
1118	AGBENYEGA STEPHEN	Male	5	3	1	4	2
1119	AGBOGBA LANDRY KWAME	Male	5	3	1	4	2
1120	AGGERH BARNABAS KOBBY	Male	5	3	1	4	2
1121	ABDULAI FAIZA	Female	1	1	1	1	1
1122	AGOE JEHOSHAPHAT SOWAH	Male	5	3	1	4	2
1123	AGUDA NARKIE PATRICIA	Female	1	1	1	1	1
1124	AGYARE PRISCILLA DARFOUR	Female	1	1	1	1	1
1125	ABEKAH EMMANUEL	Male	5	3	1	4	2
1126	AGYEI RICHARD KWAME	Male	5	3	1	4	2
1127	AGYEMAN DUAH BOATEMAA	Female	1	1	1	1	1
1128	AGYEMAN PAUL BOAKYE	Male	5	3	1	4	2
1129	ABOAGYE DAVID ADU	Male	5	3	1	4	2
1130	AGYIRI GEORGINA	Female	1	1	1	1	1
1131	AHIABLEY PORTIA	Female	1	1	1	1	1
1132	AHONI MAUDLIN AYONGO	Female	1	1	1	1	1
1133	ABOAGYE FELIX	Male	5	3	1	4	2
1134	AKAGBO REBECCA	Female	1	1	1	1	1
1135	AKOTO REINDOLF APPIAH	Male	5	3	1	4	2
1136	AKUFFO GIDEON	Male	5	3	1	4	2
1137	ABU ABDUL MANAF	Male	5	3	1	4	2
1138	ALAGBO EMMANUEL	Male	5	3	1	4	2
1139	ALLOTEY KPAKPO VINCENT	Male	5	3	1	4	2
1140	ALLOTEY PEARL NAA AKU	Female	1	1	1	1	1
1141	ABUBAKAR ARAFAT SUFYAN	Male	5	3	1	4	2
1142	AMAKYE JAMES SARPONG	Male	5	3	1	4	2
1143	AMEVOR ERIC	Male	5	3	1	4	2
1144	AMOAH CHARLOTTE KORKOR	Female	1	1	1	1	1
1145	ACHEAMPONG CHRISTABEL	Female	1	1	1	1	1
1146	AMOAH MILDRED	Female	1	1	1	1	1
1147	AMOAKO ERNESTINA OPOKUA	Female	1	1	1	1	1
1148	AMPONSAH CECILIA ABENA	Female	1	1	1	1	1
1149	ACHEAMPONG KINGSLEY	Male	5	3	1	4	2
1150	AMUZU STELLA KABUKI	Female	1	1	1	1	1
1151	ANABI MUSAH AHMED	Male	5	3	1	4	2
1152	ANDERSON GIFTY	Female	1	1	1	1	1
1153	ACHEAMPONG MICHAEL APPIAH	Male	5	3	1	4	2
1154	ANDERSON VIVIAN	Female	1	1	1	1	1
1155	ANKOMAH GEORGINA	Female	1	1	1	1	1
1156	ANNANG FRANCISCA TORSHIE	Female	1	1	1	1	1
1157	ACQUAH BENJAMIN	Male	5	3	1	4	2
1158	ANNOR RICHAEL	Female	1	1	1	1	1
1159	ANSAH FAUSTINA	Female	1	1	1	1	1
1160	ANSAH MARFO DOREEN	Female	1	1	1	1	1
1161	ACQUAH KINGSLEY OCANSEY	Male	5	3	1	4	2
1162	ANTHONIO HENRIETTA	Female	1	1	1	1	1
1163	APPIAH ISAAC	Male	5	3	1	4	2
1164	APPIAH MOSES	Male	5	3	1	4	2
1165	ACQUAH PHILIP	Male	5	3	1	4	2
1166	APPIAH PRINCE KWESI	Male	5	3	1	4	2
1167	ARKO HAGAR	Female	1	1	1	1	1
1168	ARKOH GALAHAD AHINSAH	Female	1	1	1	1	1
1169	ADAM HALIMATU SADIA	Female	1	1	1	1	1
1170	ARTHUR EBENEZER	Male	5	3	1	4	2
1171	ARTHUR ESSUMAN JAMES	Male	5	3	1	4	2
1172	ARYEETEY MESHACK	Male	5	3	1	4	2
1173	ADAMA-TETTEY MARYNSKY	Female	1	1	1	1	1
1174	ASABIRE SOPHIA	Female	1	1	1	1	1
1175	ASAHENE EMMANUELLA	Female	1	1	1	1	1
1176	ASAMANY CARL	Male	5	3	1	4	2
1177	ADAMS AFISHETU	Female	1	1	1	1	1
1178	ASAMOAH MERCY	Female	1	1	1	1	1
1179	ASARE ERIC AGYIRI AWERE	Male	5	3	1	4	2
1180	ASHITEY MCZILL HAFIZ OKO	Male	5	3	1	4	2
1181	ADAMS ANASS	Male	5	3	1	4	2
1182	ASIEDU MAVIS	Female	1	1	1	1	1
1183	ATIEMO JOSEPHINE	Female	1	1	1	1	1
1184	AWUDER WILLIAM YAO	Male	5	3	1	4	2
1185	ADARKWAH IRENE	Female	1	1	1	1	1
1186	AYER PERCY OKAI	Male	5	3	1	4	2
1187	AYISI BENJAMIN	Male	5	3	1	4	2
1188	AZAMETSI MIRABLE	Female	1	1	1	1	1
1189	ADDAE PORTIA	Female	1	1	1	1	1
1190	BEDIAKO PRISCILLA ODURO	Female	1	1	1	1	1
1191	BELLEY BETTY	Female	1	1	1	1	1
1192	BOATEMAA SLYVIA	Female	1	1	1	1	1
1193	ADDEY AUGUSTINE	Male	5	3	1	4	2
1194	BOATENG ABRAHAM AMEGAVIE	Male	5	3	1	4	2
1195	BONDZIE SAMUEL AIDOO	Male	5	3	1	4	2
1196	BONI MAXWELL EDEM	Male	5	3	1	4	2
1197	ADDICO FRANCIS AWULEY	Male	5	3	1	4	2
1198	BOTCHWAY HANNAH	Female	1	1	1	1	1
1199	BOTCHWAY JEMIMA ATSWEI	Female	1	1	1	1	1
1200	BOTCHWAY MICHAEL	Male	5	3	1	4	2
1201	ADDISON EMMANUEL	Male	5	3	1	4	2
1202	BOYETEY SOLOMON BUERNOR	Male	5	3	1	4	2
1203	BRENYAH SYLVESTER	Male	5	3	1	4	2
1204	CLELAND VERA VASTU	Female	1	1	1	1	1
1205	ADDISON STEPHEN EBO	Male	5	3	1	4	2
1206	DADZIE ISAAC	Male	5	3	1	4	2
1207	DAMALIE DEBORAH YAYRA	Female	1	1	1	1	1
1208	DARKO MOSES	Male	5	3	1	4	2
1209	ADDO NAOMI	Female	1	1	1	1	1
1210	DARKOA DORA	Female	1	1	1	1	1
1211	DENTAAH AMPOFO PATIENCE O.	Female	1	1	1	1	1
1212	DJIDONU DANIEL KWESI	Male	5	3	1	4	2
1213	ADDO PATIENCE	Female	1	1	1	1	1
1214	DOE KENNEDY	Male	5	3	1	4	2
1215	DOKU ESTHER MAKU	Female	1	1	1	1	1
1216	DOWUONA PRISCILLA NORKAI	Female	1	1	1	1	1
1217	ADDY MELIORA GENEVIEVE	Female	1	1	1	1	1
1218	DZRAMADO SANDRA	Female	1	1	1	1	1
1219	DZUFLE BRIDGET	Female	1	1	1	1	1
1220	EDZEOU BERNARD	Male	5	3	1	4	2
1221	ADEKPUITOR PETER	Male	5	3	1	4	2
1222	ENTSIEH EVANS	Male	5	3	1	4	2
1223	FOMETU GLADYS COURINE	Female	1	1	1	1	1
1224	GANYO REBECCA EYRAM	Female	1	1	1	1	1
1225	ADEKU CALEB KOJO	Male	5	3	1	4	2
1226	GBADGO CHARLOTTE	Female	1	1	1	1	1
1227	GODOMEY ABRAHAM	Male	5	3	1	4	2
1228	GYAN FELICIA	Female	1	1	1	1	1
1229	ADETI CLIFFORD KWABLA	Male	5	3	1	4	2
1230	GYAN MANTEY	Male	5	3	1	4	2
1231	GYEKYE EMMANUEL	Male	5	3	1	4	2
1232	HAGAN EDWIN EBOH	Male	5	3	1	4	2
1233	ADINKRAH ABIGAIL	Female	1	1	1	1	1
1234	HAMMOND NATHANIEL	Male	5	3	1	4	2
1235	IBRAHIM MOHAMMED SANUSI	Male	5	3	1	4	2
1236	IBRAHIM SEMIRATU	Female	1	1	1	1	1
1237	ADIOK JOSHUA ALLEN	Male	5	3	1	4	2
1238	INUSAH MOHAMMED	Male	5	3	1	4	2
1239	KABAH ALIAYIRE ALEX	Male	5	3	1	4	2
1240	KELVIN NKANSAH	Male	5	3	1	4	2
1241	ADJAKLOE FLOSSIE DZIFA	Female	1	1	1	1	1
1242	KUDJUH BRIGHT DOSU	Male	5	3	1	4	2
1243	KUMI DANIEL DARKO	Male	5	3	1	4	2
1244	KUMI MARY POKUAA	Female	1	1	1	1	1
1245	ADJASOO LINDA SELINAM	Female	1	1	1	1	1
1246	KUSI LYDIA ADJOA ADJEIWAA	Female	1	1	1	1	1
1247	KWARTENG JESSE SARPONG	Male	5	3	1	4	2
1248	LANTEI- LAMPTEY JESSE NII	Male	5	3	1	4	2
1249	ADJEI - BAAH STEPHEN	Male	5	3	1	4	2
1250	MASOPEH FELICIA VANILLA NAA AMELEY	Female	1	1	1	1	1
1251	MENDS FIDELIA APPIAH	Female	1	1	1	1	1
1252	MENSAH BETTY TELUS	Female	1	1	1	1	1
1253	ADJEI BELINDA ADJETEY	Female	1	1	1	1	1
1254	MENSAH CHARLES GYAMFI	Male	5	3	1	4	2
1255	MENSAH PHILOMINA TECHIE	Female	1	1	1	1	1
1256	MENYE GODWIN JR	Male	5	3	1	4	2
1257	ADJEI DANIEL	Male	5	3	1	4	2
1258	MOHAMMED ADAM ZAKIYU	Male	5	3	1	4	2
1259	NARTEH GEOFFREY	Male	5	3	1	4	2
1260	NKANSAH LOCTUS ADJEI	Female	1	1	1	1	1
1261	ADJEI HENRY	Male	5	3	1	4	2
1262	NORTEY NICHOLAS	Male	5	3	1	4	2
1263	NUAMAH SAMUEL	Male	5	3	1	4	2
1264	NUKPE DAVID CONVERY	Male	5	3	1	4	2
1265	ADJEI JENNIFER ODUA	Female	1	1	1	1	1
1266	NYARKO ANISA	Female	1	1	1	1	1
1267	NYARKO NICHOLAS	Male	5	3	1	4	2
1268	NYARKO WILLIAM KWABENA	Male	5	3	1	4	2
1269	ADJEIBEA RACHEAL	Female	1	1	1	1	1
1270	NYEDU ISHMAEL	Male	5	3	1	4	2
1271	OBENG JULIANA	Female	1	1	1	1	1
1272	OBUOBI SOLOMON	Male	5	3	1	4	2
1273	ADJETEY ERAMI NII ADJEI	Male	5	3	1	4	2
1274	ODOI ERIC AKO	Male	5	3	1	4	2
1275	OFFEI OSEI FRANCIS	Male	5	3	1	4	2
1276	OPOKU SAMUEL	Male	5	3	1	4	2
1277	ADJIN-TETTEY JEREMIAH	Male	5	3	1	4	2
1278	OPOKUA GIFTY NANA AMA	Female	1	1	1	1	1
1279	OSEI RICHMOND KOFI	Male	5	3	1	4	2
1280	OUEDORAOGO ROGER PETER	Male	5	3	1	4	2
1281	ADJOKATSE BERNICE	Female	1	1	1	1	1
1282	OWUSU ALEX	Male	5	3	1	4	2
1283	OWUSU-APENTENG STEPHEN	Male	5	3	1	4	2
1284	PARRY JESSICA	Male	5	3	1	4	2
1285	ADOM JENNIFER ESTHER OHENEBA	Female	1	1	1	1	1
1286	QUAICOE ENOCH	Male	5	3	1	4	2
1287	QUANSAH BELINDA	Female	1	1	1	1	1
1288	QUARTEY EVELYN NAA KWARLEY	Female	1	1	1	1	1
1289	ADOM KWADWO BOAKYE	Male	5	3	1	4	2
1290	QUARTEY SALOMEY	Female	1	1	1	1	1
1291	SAHEED AZEEZAT	Female	1	1	1	1	1
1292	SHAIBU FAUZIYATU	Female	1	1	1	1	1
1293	ADU BONA SUSANNA	Female	1	1	1	1	1
1294	SOWAH ALEXANDRA ENYONAM	Female	1	1	1	1	1
1295	SULLEY HINDU MUNIRU	Female	1	1	1	1	1
1296	TAGOE DAVID	Male	5	3	1	4	2
1297	ADU DORA	Female	1	1	1	1	1
1298	TAWIAH ADAMA OKOE	Male	5	3	1	4	2
1299	TETTEH KELVIN	Male	5	3	1	4	2
1300	TETTEH MALVIN	Male	5	3	1	4	2
1301	ADU PRISCILLA NKETIA	Female	1	1	1	1	1
1302	WADIE LINDA NKANSAH	Female	1	1	1	1	1
1303	WENOMA LINDA	Female	1	1	1	1	1
1304	YARTEY SEFIATU	Female	1	1	1	1	1
1305	ADU-AGYEI AWURA AKUA	Female	1	1	1	1	1
1306	OWUSU ALEX	Male	5	3	1	4	2
1307	OWUSU-APENTENG STEPHEN	Male	5	3	1	4	2
1308	PARRY JESSICA	Male	5	3	1	4	2
1309	ADU-TWUM FREDERICK ASANTE	Male	5	3	1	4	2
1310	QUAICOE ENOCH	Male	5	3	1	4	2
1311	QUANSAH BELINDA	Female	1	1	1	1	1
1312	QUARTEY EVELYN NAA KWARLEY	Female	1	1	1	1	1
1313	ADUSEI GIFTY YEBOAH	Female	1	1	1	1	1
1314	QUARTEY SALOMEY	Female	1	1	1	1	1
1315	SAHEED AZEEZAT	Female	1	1	1	1	1
1316	SHAIBU FAUZIYATU	Female	1	1	1	1	1
1317	ADUUM REBECCA	Female	1	1	1	1	1
1318	AFARI STEPHEN	Male	5	3	1	4	2
1319	AFOTEY PATRICK DUNYO	Male	5	3	1	4	2
1320	AFRAH TRACY NTOW	Female	1	1	1	1	1
1321	ABABIO ABEDNEGO A.	Male	5	3	1	4	2
1322	ABOAGYE ELIZABETH BOADIWAA	Female	1	1	1	1	1
1323	ABOE ANDREWS	Male	5	3	1	4	2
1324	ABRAHAM-QUANSAH MARY EVA	Female	1	1	1	1	1
1325	ABALEM JENNIFER	Female	1	1	1	1	1
1326	ADDAE SANDRA	Female	1	1	1	1	1
1327	ADJEI FREDERICK YAW	Male	5	3	1	4	2
1328	ADJEI PRINCE BAFFOUR	Male	5	3	1	4	2
1329	ABBAN VIDA OWUSU	Female	1	1	1	1	1
1330	ADJEI SAMUEL	Male	5	3	1	4	2
1331	ADJORLOLO MERCY NORKPLIM	Female	1	1	1	1	1
1332	ADOCTOR VICTORIA	Female	1	1	1	1	1
1333	ADU AFRIYIE	Male	5	3	1	4	2
1334	ADU EMMANUEL	Male	5	3	1	4	2
1335	ADZOWU MILLICENT	Female	1	1	1	1	1
1336	AFORDE JAMES ABLORDE	Male	5	3	1	4	2
1337	ABDALLAH FATIMATU	Female	1	1	1	1	1
1338	AGBENYEGA STEPHEN	Male	5	3	1	4	2
1339	AGBOGBA LANDRY KWAME	Male	5	3	1	4	2
1340	AGGERH BARNABAS KOBBY	Male	5	3	1	4	2
1341	ABDULAI FAIZA	Female	1	1	1	1	1
1342	AGOE JEHOSHAPHAT SOWAH	Male	5	3	1	4	2
1343	AGUDA NARKIE PATRICIA	Female	1	1	1	1	1
1344	AGYARE PRISCILLA DARFOUR	Female	1	1	1	1	1
1345	ABEKAH EMMANUEL	Male	5	3	1	4	2
1346	AGYEI RICHARD KWAME	Male	5	3	1	4	2
1347	AGYEMAN DUAH BOATEMAA	Female	1	1	1	1	1
1348	AGYEMAN PAUL BOAKYE	Male	5	3	1	4	2
1349	ABOAGYE DAVID ADU	Male	5	3	1	4	2
1350	AGYIRI GEORGINA	Female	1	1	1	1	1
1351	AHIABLEY PORTIA	Female	1	1	1	1	1
1352	AHONI MAUDLIN AYONGO	Female	1	1	1	1	1
1353	ABOAGYE FELIX	Male	5	3	1	4	2
1354	AKAGBO REBECCA	Female	1	1	1	1	1
1355	AKOTO REINDOLF APPIAH	Male	5	3	1	4	2
1356	AKUFFO GIDEON	Male	5	3	1	4	2
1357	ABU ABDUL MANAF	Male	5	3	1	4	2
1358	ALAGBO EMMANUEL	Male	5	3	1	4	2
1359	ALLOTEY KPAKPO VINCENT	Male	5	3	1	4	2
1360	ALLOTEY PEARL NAA AKU	Female	1	1	1	1	1
1361	ABUBAKAR ARAFAT SUFYAN	Male	5	3	1	4	2
1362	AMAKYE JAMES SARPONG	Male	5	3	1	4	2
1363	AMEVOR ERIC	Male	5	3	1	4	2
1364	AMOAH CHARLOTTE KORKOR	Female	1	1	1	1	1
1365	ACHEAMPONG CHRISTABEL	Female	1	1	1	1	1
1366	AMOAH MILDRED	Female	1	1	1	1	1
1367	AMOAKO ERNESTINA OPOKUA	Female	1	1	1	1	1
1368	AMPONSAH CECILIA ABENA	Female	1	1	1	1	1
1369	ACHEAMPONG KINGSLEY	Male	5	3	1	4	2
1370	AMUZU STELLA KABUKI	Female	1	1	1	1	1
1371	ANABI MUSAH AHMED	Male	5	3	1	4	2
1372	ANDERSON GIFTY	Female	1	1	1	1	1
1373	ACHEAMPONG MICHAEL APPIAH	Male	5	3	1	4	2
1374	ANDERSON VIVIAN	Female	1	1	1	1	1
1375	ANKOMAH GEORGINA	Female	1	1	1	1	1
1376	ANNANG FRANCISCA TORSHIE	Female	1	1	1	1	1
1377	ACQUAH BENJAMIN	Male	5	3	1	4	2
1378	ANNOR RICHAEL	Female	1	1	1	1	1
1379	ANSAH FAUSTINA	Female	1	1	1	1	1
1380	ANSAH MARFO DOREEN	Female	1	1	1	1	1
1381	ACQUAH KINGSLEY OCANSEY	Male	5	3	1	4	2
1382	ANTHONIO HENRIETTA	Female	1	1	1	1	1
1383	APPIAH ISAAC	Male	5	3	1	4	2
1384	APPIAH MOSES	Male	5	3	1	4	2
1385	ACQUAH PHILIP	Male	5	3	1	4	2
1386	APPIAH PRINCE KWESI	Male	5	3	1	4	2
1387	ARKO HAGAR	Female	1	1	1	1	1
1388	ARKOH GALAHAD AHINSAH	Female	1	1	1	1	1
1389	ADAM HALIMATU SADIA	Female	1	1	1	1	1
1390	ARTHUR EBENEZER	Male	5	3	1	4	2
1391	ARTHUR ESSUMAN JAMES	Male	5	3	1	4	2
1392	ARYEETEY MESHACK	Male	5	3	1	4	2
1393	ADAMA-TETTEY MARYNSKY	Female	1	1	1	1	1
1394	ASABIRE SOPHIA	Female	1	1	1	1	1
1395	ASAHENE EMMANUELLA	Female	1	1	1	1	1
1396	ASAMANY CARL	Male	5	3	1	4	2
1397	ADAMS AFISHETU	Female	1	1	1	1	1
1398	ASAMOAH MERCY	Female	1	1	1	1	1
1399	ASARE ERIC AGYIRI AWERE	Male	5	3	1	4	2
1400	ASHITEY MCZILL HAFIZ OKO	Male	5	3	1	4	2
1401	ADAMS ANASS	Male	5	3	1	4	2
1402	ASIEDU MAVIS	Female	1	1	1	1	1
1403	ATIEMO JOSEPHINE	Female	1	1	1	1	1
1404	AWUDER WILLIAM YAO	Male	5	3	1	4	2
1405	ADARKWAH IRENE	Female	1	1	1	1	1
1406	AYER PERCY OKAI	Male	5	3	1	4	2
1407	AYISI BENJAMIN	Male	5	3	1	4	2
1408	AZAMETSI MIRABLE	Female	1	1	1	1	1
1409	ADDAE PORTIA	Female	1	1	1	1	1
1410	BEDIAKO PRISCILLA ODURO	Female	1	1	1	1	1
1411	BELLEY BETTY	Female	1	1	1	1	1
1412	BOATEMAA SLYVIA	Female	1	1	1	1	1
1413	ADDEY AUGUSTINE	Male	5	3	1	4	2
1414	BOATENG ABRAHAM AMEGAVIE	Male	5	3	1	4	2
1415	BONDZIE SAMUEL AIDOO	Male	5	3	1	4	2
1416	BONI MAXWELL EDEM	Male	5	3	1	4	2
1417	ADDICO FRANCIS AWULEY	Male	5	3	1	4	2
1418	BOTCHWAY HANNAH	Female	1	1	1	1	1
1419	BOTCHWAY JEMIMA ATSWEI	Female	1	1	1	1	1
1420	BOTCHWAY MICHAEL	Male	5	3	1	4	2
1421	ADDISON EMMANUEL	Male	5	3	1	4	2
1422	BOYETEY SOLOMON BUERNOR	Male	5	3	1	4	2
1423	BRENYAH SYLVESTER	Male	5	3	1	4	2
1424	CLELAND VERA VASTU	Female	1	1	1	1	1
1425	ADDISON STEPHEN EBO	Male	5	3	1	4	2
1426	DADZIE ISAAC	Male	5	3	1	4	2
1427	DAMALIE DEBORAH YAYRA	Female	1	1	1	1	1
1428	DARKO MOSES	Male	5	3	1	4	2
1429	ADDO NAOMI	Female	1	1	1	1	1
1430	DARKOA DORA	Female	1	1	1	1	1
1431	DENTAAH AMPOFO PATIENCE O.	Female	1	1	1	1	1
1432	DJIDONU DANIEL KWESI	Male	5	3	1	4	2
1433	ADDO PATIENCE	Female	1	1	1	1	1
1434	DOE KENNEDY	Male	5	3	1	4	2
1435	DOKU ESTHER MAKU	Female	1	1	1	1	1
1436	DOWUONA PRISCILLA NORKAI	Female	1	1	1	1	1
1437	ADDY MELIORA GENEVIEVE	Female	1	1	1	1	1
1438	DZRAMADO SANDRA	Female	1	1	1	1	1
1439	DZUFLE BRIDGET	Female	1	1	1	1	1
1440	EDZEOU BERNARD	Male	5	3	1	4	2
1441	ADEKPUITOR PETER	Male	5	3	1	4	2
1442	ENTSIEH EVANS	Male	5	3	1	4	2
1443	FOMETU GLADYS COURINE	Female	1	1	1	1	1
1444	GANYO REBECCA EYRAM	Female	1	1	1	1	1
1445	ADEKU CALEB KOJO	Male	5	3	1	4	2
1446	GBADGO CHARLOTTE	Female	1	1	1	1	1
1447	GODOMEY ABRAHAM	Male	5	3	1	4	2
1448	GYAN FELICIA	Female	1	1	1	1	1
1449	ADETI CLIFFORD KWABLA	Male	5	3	1	4	2
1450	GYAN MANTEY	Male	5	3	1	4	2
1451	GYEKYE EMMANUEL	Male	5	3	1	4	2
1452	HAGAN EDWIN EBOH	Male	5	3	1	4	2
1453	ADINKRAH ABIGAIL	Female	1	1	1	1	1
1454	HAMMOND NATHANIEL	Male	5	3	1	4	2
1455	IBRAHIM MOHAMMED SANUSI	Male	5	3	1	4	2
1456	IBRAHIM SEMIRATU	Female	1	1	1	1	1
1457	ADIOK JOSHUA ALLEN	Male	5	3	1	4	2
1458	INUSAH MOHAMMED	Male	5	3	1	4	2
1459	KABAH ALIAYIRE ALEX	Male	5	3	1	4	2
1460	KELVIN NKANSAH	Male	5	3	1	4	2
1461	ADJAKLOE FLOSSIE DZIFA	Female	1	1	1	1	1
1462	KUDJUH BRIGHT DOSU	Male	5	3	1	4	2
1463	KUMI DANIEL DARKO	Male	5	3	1	4	2
1464	KUMI MARY POKUAA	Female	1	1	1	1	1
1465	ADJASOO LINDA SELINAM	Female	1	1	1	1	1
1466	KUSI LYDIA ADJOA ADJEIWAA	Female	1	1	1	1	1
1467	KWARTENG JESSE SARPONG	Male	5	3	1	4	2
1468	LANTEI- LAMPTEY JESSE NII	Male	5	3	1	4	2
1469	ADJEI - BAAH STEPHEN	Male	5	3	1	4	2
1470	MASOPEH FELICIA VANILLA NAA AMELEY	Female	1	1	1	1	1
1471	MENDS FIDELIA APPIAH	Female	1	1	1	1	1
1472	MENSAH BETTY TELUS	Female	1	1	1	1	1
1473	ADJEI BELINDA ADJETEY	Female	1	1	1	1	1
1474	MENSAH CHARLES GYAMFI	Male	5	3	1	4	2
1475	MENSAH PHILOMINA TECHIE	Female	1	1	1	1	1
1476	MENYE GODWIN JR	Male	5	3	1	4	2
1477	ADJEI DANIEL	Male	5	3	1	4	2
1478	MOHAMMED ADAM ZAKIYU	Male	5	3	1	4	2
1479	NARTEH GEOFFREY	Male	5	3	1	4	2
1480	NKANSAH LOCTUS ADJEI	Female	1	1	1	1	1
1481	ADJEI HENRY	Male	5	3	1	4	2
1482	NORTEY NICHOLAS	Male	5	3	1	4	2
1483	NUAMAH SAMUEL	Male	5	3	1	4	2
1484	NUKPE DAVID CONVERY	Male	5	3	1	4	2
1485	ADJEI JENNIFER ODUA	Female	1	1	1	1	1
1486	NYARKO ANISA	Female	1	1	1	1	1
1487	NYARKO NICHOLAS	Male	5	3	1	4	2
1488	NYARKO WILLIAM KWABENA	Male	5	3	1	4	2
1489	ADJEIBEA RACHEAL	Female	1	1	1	1	1
1490	NYEDU ISHMAEL	Male	5	3	1	4	2
1491	OBENG JULIANA	Female	1	1	1	1	1
1492	OBUOBI SOLOMON	Male	5	3	1	4	2
1493	ADJETEY ERAMI NII ADJEI	Male	5	3	1	4	2
1494	ODOI ERIC AKO	Male	5	3	1	4	2
1495	OFFEI OSEI FRANCIS	Male	5	3	1	4	2
1496	OPOKU SAMUEL	Male	5	3	1	4	2
1497	ADJIN-TETTEY JEREMIAH	Male	5	3	1	4	2
1498	OPOKUA GIFTY NANA AMA	Female	1	1	1	1	1
1499	OSEI RICHMOND KOFI	Male	5	3	1	4	2
1500	OUEDORAOGO ROGER PETER	Male	5	3	1	4	2
1501	ADJOKATSE BERNICE	Female	1	1	1	1	1
1502	OWUSU ALEX	Male	5	3	1	4	2
1503	OWUSU-APENTENG STEPHEN	Male	5	3	1	4	2
1504	PARRY JESSICA	Male	5	3	1	4	2
1505	ADOM JENNIFER ESTHER OHENEBA	Female	1	1	1	1	1
1506	QUAICOE ENOCH	Male	5	3	1	4	2
1507	QUANSAH BELINDA	Female	1	1	1	1	1
1508	QUARTEY EVELYN NAA KWARLEY	Female	1	1	1	1	1
1509	ADOM KWADWO BOAKYE	Male	5	3	1	4	2
1510	QUARTEY SALOMEY	Female	1	1	1	1	1
1511	SAHEED AZEEZAT	Female	1	1	1	1	1
1512	SHAIBU FAUZIYATU	Female	1	1	1	1	1
1513	ADU BONA SUSANNA	Female	1	1	1	1	1
1514	SOWAH ALEXANDRA ENYONAM	Female	1	1	1	1	1
1515	SULLEY HINDU MUNIRU	Female	1	1	1	1	1
1516	TAGOE DAVID	Male	5	3	1	4	2
1517	ADU DORA	Female	1	1	1	1	1
1518	TAWIAH ADAMA OKOE	Male	5	3	1	4	2
1519	TETTEH KELVIN	Male	5	3	1	4	2
1520	TETTEH MALVIN	Male	5	3	1	4	2
1521	ADU PRISCILLA NKETIA	Female	1	1	1	1	1
1522	WADIE LINDA NKANSAH	Female	1	1	1	1	1
1523	WENOMA LINDA	Female	1	1	1	1	1
1524	YARTEY SEFIATU	Female	1	1	1	1	1
1525	ADU-AGYEI AWURA AKUA	Female	1	1	1	1	1
1526	OWUSU ALEX	Male	5	3	1	4	2
1527	OWUSU-APENTENG STEPHEN	Male	5	3	1	4	2
1528	PARRY JESSICA	Male	5	3	1	4	2
1529	ADU-TWUM FREDERICK ASANTE	Male	5	3	1	4	2
1530	QUAICOE ENOCH	Male	5	3	1	4	2
1531	QUANSAH BELINDA	Female	1	1	1	1	1
1532	QUARTEY EVELYN NAA KWARLEY	Female	1	1	1	1	1
1533	ADUSEI GIFTY YEBOAH	Female	1	1	1	1	1
1534	QUARTEY SALOMEY	Female	1	1	1	1	1
1535	SAHEED AZEEZAT	Female	1	1	1	1	1
1536	SHAIBU FAUZIYATU	Female	1	1	1	1	1
1537	ADUUM REBECCA	Female	1	1	1	1	1
1538	AFARI STEPHEN	Male	5	3	1	4	2
1539	AFOTEY PATRICK DUNYO	Male	5	3	1	4	2
1540	AFRAH TRACY NTOW	Female	1	1	1	1	1
1541	ABABIO ABEDNEGO A.	Male	5	3	1	4	2
1542	ABOAGYE ELIZABETH BOADIWAA	Female	1	1	1	1	1
1543	ABOE ANDREWS	Male	5	3	1	4	2
1544	ABRAHAM-QUANSAH MARY EVA	Female	1	1	1	1	1
1545	ABALEM JENNIFER	Female	1	1	1	1	1
1546	ADDAE SANDRA	Female	1	1	1	1	1
1547	ADJEI FREDERICK YAW	Male	5	3	1	4	2
1548	ADJEI PRINCE BAFFOUR	Male	5	3	1	4	2
1549	ABBAN VIDA OWUSU	Female	1	1	1	1	1
1550	ADJEI SAMUEL	Male	5	3	1	4	2
1551	ADJORLOLO MERCY NORKPLIM	Female	1	1	1	1	1
1552	ADOCTOR VICTORIA	Female	1	1	1	1	1
1553	ADU AFRIYIE	Male	5	3	1	4	2
1554	ADU EMMANUEL	Male	5	3	1	4	2
1555	ADZOWU MILLICENT	Female	1	1	1	1	1
1556	AFORDE JAMES ABLORDE	Male	5	3	1	4	2
1557	ABDALLAH FATIMATU	Female	1	1	1	1	1
1558	AGBENYEGA STEPHEN	Male	5	3	1	4	2
1559	AGBOGBA LANDRY KWAME	Male	5	3	1	4	2
1560	AGGERH BARNABAS KOBBY	Male	5	3	1	4	2
1561	ABDULAI FAIZA	Female	1	1	1	1	1
1562	AGOE JEHOSHAPHAT SOWAH	Male	5	3	1	4	2
1563	AGUDA NARKIE PATRICIA	Female	1	1	1	1	1
1564	AGYARE PRISCILLA DARFOUR	Female	1	1	1	1	1
1565	ABEKAH EMMANUEL	Male	5	3	1	4	2
1566	AGYEI RICHARD KWAME	Male	5	3	1	4	2
1567	AGYEMAN DUAH BOATEMAA	Female	1	1	1	1	1
1568	AGYEMAN PAUL BOAKYE	Male	5	3	1	4	2
1569	ABOAGYE DAVID ADU	Male	5	3	1	4	2
1570	AGYIRI GEORGINA	Female	1	1	1	1	1
1571	AHIABLEY PORTIA	Female	1	1	1	1	1
1572	AHONI MAUDLIN AYONGO	Female	1	1	1	1	1
1573	ABOAGYE FELIX	Male	5	3	1	4	2
1574	AKAGBO REBECCA	Female	1	1	1	1	1
1575	AKOTO REINDOLF APPIAH	Male	5	3	1	4	2
1576	AKUFFO GIDEON	Male	5	3	1	4	2
1577	ABU ABDUL MANAF	Male	5	3	1	4	2
1578	ALAGBO EMMANUEL	Male	5	3	1	4	2
1579	ALLOTEY KPAKPO VINCENT	Male	5	3	1	4	2
1580	ALLOTEY PEARL NAA AKU	Female	1	1	1	1	1
1581	ABUBAKAR ARAFAT SUFYAN	Male	5	3	1	4	2
1582	AMAKYE JAMES SARPONG	Male	5	3	1	4	2
1583	AMEVOR ERIC	Male	5	3	1	4	2
1584	AMOAH CHARLOTTE KORKOR	Female	1	1	1	1	1
1585	ACHEAMPONG CHRISTABEL	Female	1	1	1	1	1
1586	AMOAH MILDRED	Female	1	1	1	1	1
1587	AMOAKO ERNESTINA OPOKUA	Female	1	1	1	1	1
1588	AMPONSAH CECILIA ABENA	Female	1	1	1	1	1
1589	ACHEAMPONG KINGSLEY	Male	5	3	1	4	2
1590	AMUZU STELLA KABUKI	Female	1	1	1	1	1
1591	ANABI MUSAH AHMED	Male	5	3	1	4	2
1592	ANDERSON GIFTY	Female	1	1	1	1	1
1593	ACHEAMPONG MICHAEL APPIAH	Male	5	3	1	4	2
1594	ANDERSON VIVIAN	Female	1	1	1	1	1
1595	ANKOMAH GEORGINA	Female	1	1	1	1	1
1596	ANNANG FRANCISCA TORSHIE	Female	1	1	1	1	1
1597	ACQUAH BENJAMIN	Male	5	3	1	4	2
1598	ANNOR RICHAEL	Female	1	1	1	1	1
1599	ANSAH FAUSTINA	Female	1	1	1	1	1
1600	ANSAH MARFO DOREEN	Female	1	1	1	1	1
1601	ACQUAH KINGSLEY OCANSEY	Male	5	3	1	4	2
1602	ANTHONIO HENRIETTA	Female	1	1	1	1	1
1603	APPIAH ISAAC	Male	5	3	1	4	2
1604	APPIAH MOSES	Male	5	3	1	4	2
1605	ACQUAH PHILIP	Male	5	3	1	4	2
1606	APPIAH PRINCE KWESI	Male	5	3	1	4	2
1607	ARKO HAGAR	Female	1	1	1	1	1
1608	ARKOH GALAHAD AHINSAH	Female	1	1	1	1	1
1609	ADAM HALIMATU SADIA	Female	1	1	1	1	1
1610	ARTHUR EBENEZER	Male	5	3	1	4	2
1611	ARTHUR ESSUMAN JAMES	Male	5	3	1	4	2
1612	ARYEETEY MESHACK	Male	5	3	1	4	2
1613	ADAMA-TETTEY MARYNSKY	Female	1	1	1	1	1
1614	ASABIRE SOPHIA	Female	1	1	1	1	1
1615	ASAHENE EMMANUELLA	Female	1	1	1	1	1
1616	ASAMANY CARL	Male	5	3	1	4	2
1617	ADAMS AFISHETU	Female	1	1	1	1	1
1618	ASAMOAH MERCY	Female	1	1	1	1	1
1619	ASARE ERIC AGYIRI AWERE	Male	5	3	1	4	2
1620	ASHITEY MCZILL HAFIZ OKO	Male	5	3	1	4	2
1621	ADAMS ANASS	Male	5	3	1	4	2
1622	ASIEDU MAVIS	Female	1	1	1	1	1
1623	ATIEMO JOSEPHINE	Female	1	1	1	1	1
1624	AWUDER WILLIAM YAO	Male	5	3	1	4	2
1625	ADARKWAH IRENE	Female	1	1	1	1	1
1626	AYER PERCY OKAI	Male	5	3	1	4	2
1627	AYISI BENJAMIN	Male	5	3	1	4	2
1628	AZAMETSI MIRABLE	Female	1	1	1	1	1
1629	ADDAE PORTIA	Female	1	1	1	1	1
1630	BEDIAKO PRISCILLA ODURO	Female	1	1	1	1	1
1631	BELLEY BETTY	Female	1	1	1	1	1
1632	BOATEMAA SLYVIA	Female	1	1	1	1	1
1633	ADDEY AUGUSTINE	Male	5	3	1	4	2
1634	BOATENG ABRAHAM AMEGAVIE	Male	5	3	1	4	2
1635	BONDZIE SAMUEL AIDOO	Male	5	3	1	4	2
1636	BONI MAXWELL EDEM	Male	5	3	1	4	2
1637	ADDICO FRANCIS AWULEY	Male	5	3	1	4	2
1638	BOTCHWAY HANNAH	Female	1	1	1	1	1
1639	BOTCHWAY JEMIMA ATSWEI	Female	1	1	1	1	1
1640	BOTCHWAY MICHAEL	Male	5	3	1	4	2
1641	ADDISON EMMANUEL	Male	5	3	1	4	2
1642	BOYETEY SOLOMON BUERNOR	Male	5	3	1	4	2
1643	BRENYAH SYLVESTER	Male	5	3	1	4	2
1644	CLELAND VERA VASTU	Female	1	1	1	1	1
1645	ADDISON STEPHEN EBO	Male	5	3	1	4	2
1646	DADZIE ISAAC	Male	5	3	1	4	2
1647	DAMALIE DEBORAH YAYRA	Female	1	1	1	1	1
1648	DARKO MOSES	Male	5	3	1	4	2
1649	ADDO NAOMI	Female	1	1	1	1	1
1650	DARKOA DORA	Female	1	1	1	1	1
1651	DENTAAH AMPOFO PATIENCE O.	Female	1	1	1	1	1
1652	DJIDONU DANIEL KWESI	Male	5	3	1	4	2
1653	ADDO PATIENCE	Female	1	1	1	1	1
1654	DOE KENNEDY	Male	5	3	1	4	2
1655	DOKU ESTHER MAKU	Female	1	1	1	1	1
1656	DOWUONA PRISCILLA NORKAI	Female	1	1	1	1	1
1657	ADDY MELIORA GENEVIEVE	Female	1	1	1	1	1
1658	DZRAMADO SANDRA	Female	1	1	1	1	1
1659	DZUFLE BRIDGET	Female	1	1	1	1	1
1660	EDZEOU BERNARD	Male	5	3	1	4	2
1661	ADEKPUITOR PETER	Male	5	3	1	4	2
1662	ENTSIEH EVANS	Male	5	3	1	4	2
1663	FOMETU GLADYS COURINE	Female	1	1	1	1	1
1664	GANYO REBECCA EYRAM	Female	1	1	1	1	1
1665	ADEKU CALEB KOJO	Male	5	3	1	4	2
1666	GBADGO CHARLOTTE	Female	1	1	1	1	1
1667	GODOMEY ABRAHAM	Male	5	3	1	4	2
1668	GYAN FELICIA	Female	1	1	1	1	1
1669	ADETI CLIFFORD KWABLA	Male	5	3	1	4	2
1670	GYAN MANTEY	Male	5	3	1	4	2
1671	GYEKYE EMMANUEL	Male	5	3	1	4	2
1672	HAGAN EDWIN EBOH	Male	5	3	1	4	2
1673	ADINKRAH ABIGAIL	Female	1	1	1	1	1
1674	HAMMOND NATHANIEL	Male	5	3	1	4	2
1675	IBRAHIM MOHAMMED SANUSI	Male	5	3	1	4	2
1676	IBRAHIM SEMIRATU	Female	1	1	1	1	1
1677	ADIOK JOSHUA ALLEN	Male	5	3	1	4	2
1678	INUSAH MOHAMMED	Male	5	3	1	4	2
1679	KABAH ALIAYIRE ALEX	Male	5	3	1	4	2
1680	KELVIN NKANSAH	Male	5	3	1	4	2
1681	ADJAKLOE FLOSSIE DZIFA	Female	1	1	1	1	1
1682	KUDJUH BRIGHT DOSU	Male	5	3	1	4	2
1683	KUMI DANIEL DARKO	Male	5	3	1	4	2
1684	KUMI MARY POKUAA	Female	1	1	1	1	1
1685	ADJASOO LINDA SELINAM	Female	1	1	1	1	1
1686	KUSI LYDIA ADJOA ADJEIWAA	Female	1	1	1	1	1
1687	KWARTENG JESSE SARPONG	Male	5	3	1	4	2
1688	LANTEI- LAMPTEY JESSE NII	Male	5	3	1	4	2
1689	ADJEI - BAAH STEPHEN	Male	5	3	1	4	2
1690	MASOPEH FELICIA VANILLA NAA AMELEY	Female	1	1	1	1	1
1691	MENDS FIDELIA APPIAH	Female	1	1	1	1	1
1692	MENSAH BETTY TELUS	Female	1	1	1	1	1
1693	ADJEI BELINDA ADJETEY	Female	1	1	1	1	1
1694	MENSAH CHARLES GYAMFI	Male	5	3	1	4	2
1695	MENSAH PHILOMINA TECHIE	Female	1	1	1	1	1
1696	MENYE GODWIN JR	Male	5	3	1	4	2
1697	ADJEI DANIEL	Male	5	3	1	4	2
1698	MOHAMMED ADAM ZAKIYU	Male	5	3	1	4	2
1699	NARTEH GEOFFREY	Male	5	3	1	4	2
1700	NKANSAH LOCTUS ADJEI	Female	1	1	1	1	1
1701	ADJEI HENRY	Male	5	3	1	4	2
1702	NORTEY NICHOLAS	Male	5	3	1	4	2
1703	NUAMAH SAMUEL	Male	5	3	1	4	2
1704	NUKPE DAVID CONVERY	Male	5	3	1	4	2
1705	ADJEI JENNIFER ODUA	Female	1	1	1	1	1
1706	NYARKO ANISA	Female	1	1	1	1	1
1707	NYARKO NICHOLAS	Male	5	3	1	4	2
1708	NYARKO WILLIAM KWABENA	Male	5	3	1	4	2
1709	ADJEIBEA RACHEAL	Female	1	1	1	1	1
1710	NYEDU ISHMAEL	Male	5	3	1	4	2
1711	OBENG JULIANA	Female	1	1	1	1	1
1712	OBUOBI SOLOMON	Male	5	3	1	4	2
1713	ADJETEY ERAMI NII ADJEI	Male	5	3	1	4	2
1714	ODOI ERIC AKO	Male	5	3	1	4	2
1715	OFFEI OSEI FRANCIS	Male	5	3	1	4	2
1716	OPOKU SAMUEL	Male	5	3	1	4	2
1717	ADJIN-TETTEY JEREMIAH	Male	5	3	1	4	2
1718	OPOKUA GIFTY NANA AMA	Female	1	1	1	1	1
1719	OSEI RICHMOND KOFI	Male	5	3	1	4	2
1720	OUEDORAOGO ROGER PETER	Male	5	3	1	4	2
1721	ADJOKATSE BERNICE	Female	1	1	1	1	1
1722	OWUSU ALEX	Male	5	3	1	4	2
1723	OWUSU-APENTENG STEPHEN	Male	5	3	1	4	2
1724	PARRY JESSICA	Male	5	3	1	4	2
1725	ADOM JENNIFER ESTHER OHENEBA	Female	1	1	1	1	1
1726	QUAICOE ENOCH	Male	5	3	1	4	2
1727	QUANSAH BELINDA	Female	1	1	1	1	1
1728	QUARTEY EVELYN NAA KWARLEY	Female	1	1	1	1	1
1729	ADOM KWADWO BOAKYE	Male	5	3	1	4	2
1730	QUARTEY SALOMEY	Female	1	1	1	1	1
1731	SAHEED AZEEZAT	Female	1	1	1	1	1
1732	SHAIBU FAUZIYATU	Female	1	1	1	1	1
1733	ADU BONA SUSANNA	Female	1	1	1	1	1
1734	SOWAH ALEXANDRA ENYONAM	Female	1	1	1	1	1
1735	SULLEY HINDU MUNIRU	Female	1	1	1	1	1
1736	TAGOE DAVID	Male	5	3	1	4	2
1737	ADU DORA	Female	1	1	1	1	1
1738	TAWIAH ADAMA OKOE	Male	5	3	1	4	2
1739	TETTEH KELVIN	Male	5	3	1	4	2
1740	TETTEH MALVIN	Male	5	3	1	4	2
1741	ADU PRISCILLA NKETIA	Female	1	1	1	1	1
1742	WADIE LINDA NKANSAH	Female	1	1	1	1	1
1743	WENOMA LINDA	Female	1	1	1	1	1
1744	YARTEY SEFIATU	Female	1	1	1	1	1
1745	ADU-AGYEI AWURA AKUA	Female	1	1	1	1	1
1746	OWUSU ALEX	Male	5	3	1	4	2
1747	OWUSU-APENTENG STEPHEN	Male	5	3	1	4	2
1748	PARRY JESSICA	Male	5	3	1	4	2
1749	ADU-TWUM FREDERICK ASANTE	Male	5	3	1	4	2
1750	QUAICOE ENOCH	Male	5	3	1	4	2
1751	QUANSAH BELINDA	Female	1	1	1	1	1
1752	QUARTEY EVELYN NAA KWARLEY	Female	1	1	1	1	1
1753	ADUSEI GIFTY YEBOAH	Female	1	1	1	1	1
1754	QUARTEY SALOMEY	Female	1	1	1	1	1
1755	SAHEED AZEEZAT	Female	1	1	1	1	1
1756	SHAIBU FAUZIYATU	Female	1	1	1	1	1
1757	ADUUM REBECCA	Female	1	1	1	1	1
1758	AFARI STEPHEN	Male	5	3	1	4	2
1759	AFOTEY PATRICK DUNYO	Male	5	3	1	4	2
1760	AFRAH TRACY NTOW	Female	1	1	1	1	1
1761	ABABIO ABEDNEGO A.	Male	5	3	1	4	2
1762	ABOAGYE ELIZABETH BOADIWAA	Female	1	1	1	1	1
1763	ABOE ANDREWS	Male	5	3	1	4	2
1764	ABRAHAM-QUANSAH MARY EVA	Female	1	1	1	1	1
1765	ABALEM JENNIFER	Female	1	1	1	1	1
1766	ADDAE SANDRA	Female	1	1	1	1	1
1767	ADJEI FREDERICK YAW	Male	5	3	1	4	2
1768	ADJEI PRINCE BAFFOUR	Male	5	3	1	4	2
1769	ABBAN VIDA OWUSU	Female	1	1	1	1	1
1770	ADJEI SAMUEL	Male	5	3	1	4	2
1771	ADJORLOLO MERCY NORKPLIM	Female	1	1	1	1	1
1772	ADOCTOR VICTORIA	Female	1	1	1	1	1
1773	ADU AFRIYIE	Male	5	3	1	4	2
1774	ADU EMMANUEL	Male	5	3	1	4	2
1775	ADZOWU MILLICENT	Female	1	1	1	1	1
1776	AFORDE JAMES ABLORDE	Male	5	3	1	4	2
1777	ABDALLAH FATIMATU	Female	1	1	1	1	1
1778	AGBENYEGA STEPHEN	Male	5	3	1	4	2
1779	AGBOGBA LANDRY KWAME	Male	5	3	1	4	2
1780	AGGERH BARNABAS KOBBY	Male	5	3	1	4	2
1781	ABDULAI FAIZA	Female	1	1	1	1	1
1782	AGOE JEHOSHAPHAT SOWAH	Male	5	3	1	4	2
1783	AGUDA NARKIE PATRICIA	Female	1	1	1	1	1
1784	AGYARE PRISCILLA DARFOUR	Female	1	1	1	1	1
1785	ABEKAH EMMANUEL	Male	5	3	1	4	2
1786	AGYEI RICHARD KWAME	Male	5	3	1	4	2
1787	AGYEMAN DUAH BOATEMAA	Female	1	1	1	1	1
1788	AGYEMAN PAUL BOAKYE	Male	5	3	1	4	2
1789	ABOAGYE DAVID ADU	Male	5	3	1	4	2
1790	AGYIRI GEORGINA	Female	1	1	1	1	1
1791	AHIABLEY PORTIA	Female	1	1	1	1	1
1792	AHONI MAUDLIN AYONGO	Female	1	1	1	1	1
1793	ABOAGYE FELIX	Male	5	3	1	4	2
1794	AKAGBO REBECCA	Female	1	1	1	1	1
1795	AKOTO REINDOLF APPIAH	Male	5	3	1	4	2
1796	AKUFFO GIDEON	Male	5	3	1	4	2
1797	ABU ABDUL MANAF	Male	5	3	1	4	2
1798	ALAGBO EMMANUEL	Male	5	3	1	4	2
1799	ALLOTEY KPAKPO VINCENT	Male	5	3	1	4	2
1800	ALLOTEY PEARL NAA AKU	Female	1	1	1	1	1
1801	ABUBAKAR ARAFAT SUFYAN	Male	5	3	1	4	2
1802	AMAKYE JAMES SARPONG	Male	5	3	1	4	2
1803	AMEVOR ERIC	Male	5	3	1	4	2
1804	AMOAH CHARLOTTE KORKOR	Female	1	1	1	1	1
1805	ACHEAMPONG CHRISTABEL	Female	1	1	1	1	1
1806	AMOAH MILDRED	Female	1	1	1	1	1
1807	AMOAKO ERNESTINA OPOKUA	Female	1	1	1	1	1
1808	AMPONSAH CECILIA ABENA	Female	1	1	1	1	1
1809	ACHEAMPONG KINGSLEY	Male	5	3	1	4	2
1810	AMUZU STELLA KABUKI	Female	1	1	1	1	1
1811	ANABI MUSAH AHMED	Male	5	3	1	4	2
1812	ANDERSON GIFTY	Female	1	1	1	1	1
1813	ACHEAMPONG MICHAEL APPIAH	Male	5	3	1	4	2
1814	ANDERSON VIVIAN	Female	1	1	1	1	1
1815	ANKOMAH GEORGINA	Female	1	1	1	1	1
1816	ANNANG FRANCISCA TORSHIE	Female	1	1	1	1	1
1817	ACQUAH BENJAMIN	Male	5	3	1	4	2
1818	ANNOR RICHAEL	Female	1	1	1	1	1
1819	ANSAH FAUSTINA	Female	1	1	1	1	1
1820	ANSAH MARFO DOREEN	Female	1	1	1	1	1
1821	ACQUAH KINGSLEY OCANSEY	Male	5	3	1	4	2
1822	ANTHONIO HENRIETTA	Female	1	1	1	1	1
1823	APPIAH ISAAC	Male	5	3	1	4	2
1824	APPIAH MOSES	Male	5	3	1	4	2
1825	ACQUAH PHILIP	Male	5	3	1	4	2
1826	APPIAH PRINCE KWESI	Male	5	3	1	4	2
1827	ARKO HAGAR	Female	1	1	1	1	1
1828	ARKOH GALAHAD AHINSAH	Female	1	1	1	1	1
1829	ADAM HALIMATU SADIA	Female	1	1	1	1	1
1830	ARTHUR EBENEZER	Male	5	3	1	4	2
1831	ARTHUR ESSUMAN JAMES	Male	5	3	1	4	2
1832	ARYEETEY MESHACK	Male	5	3	1	4	2
1833	ADAMA-TETTEY MARYNSKY	Female	1	1	1	1	1
1834	ASABIRE SOPHIA	Female	1	1	1	1	1
1835	ASAHENE EMMANUELLA	Female	1	1	1	1	1
1836	ASAMANY CARL	Male	5	3	1	4	2
1837	ADAMS AFISHETU	Female	1	1	1	1	1
1838	ASAMOAH MERCY	Female	1	1	1	1	1
1839	ASARE ERIC AGYIRI AWERE	Male	5	3	1	4	2
1840	ASHITEY MCZILL HAFIZ OKO	Male	5	3	1	4	2
1841	ADAMS ANASS	Male	5	3	1	4	2
1842	ASIEDU MAVIS	Female	1	1	1	1	1
1843	ATIEMO JOSEPHINE	Female	1	1	1	1	1
1844	AWUDER WILLIAM YAO	Male	5	3	1	4	2
1845	ADARKWAH IRENE	Female	1	1	1	1	1
1846	AYER PERCY OKAI	Male	5	3	1	4	2
1847	AYISI BENJAMIN	Male	5	3	1	4	2
1848	AZAMETSI MIRABLE	Female	1	1	1	1	1
1849	ADDAE PORTIA	Female	1	1	1	1	1
1850	BEDIAKO PRISCILLA ODURO	Female	1	1	1	1	1
1851	BELLEY BETTY	Female	1	1	1	1	1
1852	BOATEMAA SLYVIA	Female	1	1	1	1	1
1853	ADDEY AUGUSTINE	Male	5	3	1	4	2
1854	BOATENG ABRAHAM AMEGAVIE	Male	5	3	1	4	2
1855	BONDZIE SAMUEL AIDOO	Male	5	3	1	4	2
1856	BONI MAXWELL EDEM	Male	5	3	1	4	2
1857	ADDICO FRANCIS AWULEY	Male	5	3	1	4	2
1858	BOTCHWAY HANNAH	Female	1	1	1	1	1
1859	BOTCHWAY JEMIMA ATSWEI	Female	1	1	1	1	1
1860	BOTCHWAY MICHAEL	Male	5	3	1	4	2
1861	ADDISON EMMANUEL	Male	5	3	1	4	2
1862	BOYETEY SOLOMON BUERNOR	Male	5	3	1	4	2
1863	BRENYAH SYLVESTER	Male	5	3	1	4	2
1864	CLELAND VERA VASTU	Female	1	1	1	1	1
1865	ADDISON STEPHEN EBO	Male	5	3	1	4	2
1866	DADZIE ISAAC	Male	5	3	1	4	2
1867	DAMALIE DEBORAH YAYRA	Female	1	1	1	1	1
1868	DARKO MOSES	Male	5	3	1	4	2
1869	ADDO NAOMI	Female	1	1	1	1	1
1870	DARKOA DORA	Female	1	1	1	1	1
1871	DENTAAH AMPOFO PATIENCE O.	Female	1	1	1	1	1
1872	DJIDONU DANIEL KWESI	Male	5	3	1	4	2
1873	ADDO PATIENCE	Female	1	1	1	1	1
1874	DOE KENNEDY	Male	5	3	1	4	2
1875	DOKU ESTHER MAKU	Female	1	1	1	1	1
1876	DOWUONA PRISCILLA NORKAI	Female	1	1	1	1	1
1877	ADDY MELIORA GENEVIEVE	Female	1	1	1	1	1
1878	DZRAMADO SANDRA	Female	1	1	1	1	1
1879	DZUFLE BRIDGET	Female	1	1	1	1	1
1880	EDZEOU BERNARD	Male	5	3	1	4	2
1881	ADEKPUITOR PETER	Male	5	3	1	4	2
1882	ENTSIEH EVANS	Male	5	3	1	4	2
1883	FOMETU GLADYS COURINE	Female	1	1	1	1	1
1884	GANYO REBECCA EYRAM	Female	1	1	1	1	1
1885	ADEKU CALEB KOJO	Male	5	3	1	4	2
1886	GBADGO CHARLOTTE	Female	1	1	1	1	1
1887	GODOMEY ABRAHAM	Male	5	3	1	4	2
1888	GYAN FELICIA	Female	1	1	1	1	1
1889	ADETI CLIFFORD KWABLA	Male	5	3	1	4	2
1890	GYAN MANTEY	Male	5	3	1	4	2
1891	GYEKYE EMMANUEL	Male	5	3	1	4	2
1892	HAGAN EDWIN EBOH	Male	5	3	1	4	2
1893	ADINKRAH ABIGAIL	Female	1	1	1	1	1
1894	HAMMOND NATHANIEL	Male	5	3	1	4	2
1895	IBRAHIM MOHAMMED SANUSI	Male	5	3	1	4	2
1896	IBRAHIM SEMIRATU	Female	1	1	1	1	1
1897	ADIOK JOSHUA ALLEN	Male	5	3	1	4	2
1898	INUSAH MOHAMMED	Male	5	3	1	4	2
1899	KABAH ALIAYIRE ALEX	Male	5	3	1	4	2
1900	KELVIN NKANSAH	Male	5	3	1	4	2
1901	ADJAKLOE FLOSSIE DZIFA	Female	1	1	1	1	1
1902	KUDJUH BRIGHT DOSU	Male	5	3	1	4	2
1903	KUMI DANIEL DARKO	Male	5	3	1	4	2
1904	KUMI MARY POKUAA	Female	1	1	1	1	1
1905	ADJASOO LINDA SELINAM	Female	1	1	1	1	1
1906	KUSI LYDIA ADJOA ADJEIWAA	Female	1	1	1	1	1
1907	KWARTENG JESSE SARPONG	Male	5	3	1	4	2
1908	LANTEI- LAMPTEY JESSE NII	Male	5	3	1	4	2
1909	ADJEI - BAAH STEPHEN	Male	5	3	1	4	2
1910	MASOPEH FELICIA VANILLA NAA AMELEY	Female	1	1	1	1	1
1911	MENDS FIDELIA APPIAH	Female	1	1	1	1	1
1912	MENSAH BETTY TELUS	Female	1	1	1	1	1
1913	ADJEI BELINDA ADJETEY	Female	1	1	1	1	1
1914	MENSAH CHARLES GYAMFI	Male	5	3	1	4	2
1915	MENSAH PHILOMINA TECHIE	Female	1	1	1	1	1
1916	MENYE GODWIN JR	Male	5	3	1	4	2
1917	ADJEI DANIEL	Male	5	3	1	4	2
1918	MOHAMMED ADAM ZAKIYU	Male	5	3	1	4	2
1919	NARTEH GEOFFREY	Male	5	3	1	4	2
1920	NKANSAH LOCTUS ADJEI	Female	1	1	1	1	1
1921	ADJEI HENRY	Male	5	3	1	4	2
1922	NORTEY NICHOLAS	Male	5	3	1	4	2
1923	NUAMAH SAMUEL	Male	5	3	1	4	2
1924	NUKPE DAVID CONVERY	Male	5	3	1	4	2
1925	ADJEI JENNIFER ODUA	Female	1	1	1	1	1
1926	NYARKO ANISA	Female	1	1	1	1	1
1927	NYARKO NICHOLAS	Male	5	3	1	4	2
1928	NYARKO WILLIAM KWABENA	Male	5	3	1	4	2
1929	ADJEIBEA RACHEAL	Female	1	1	1	1	1
[truncated: 2,472 more rows]
